# Supplementary material for: ERK3/MAPK6 dictates CDC42/RAC1 activity and ARP2/3-dependent actin polymerization
Source: eLife journal article supplement (doi:10.7554/elife.85167), 2023-04-14
Supplement: fig1-data2 [file Figure 1F-source data.xlsx]

## Sheet: Sheet1
Cell 1		Cell 2		Cell 3		Cell 4					KO	Cell 1		Cell 2		Cell 3		Cell 4
X	Y	X	Y	X	Y	X	Y					X	Y	X	Y	X	Y	X	Y
0	0	0	0	0	0	0	0					0	0	0	0	0	0	0	0
13.9	0.4	-16.8	6.3	-13.7	-30.1	-18.7	-13.9					-3.3	7.1	-15.6	-4.4	-18.1	15.6	-10.6	-12.1
25.1	-49.3	-20.2	15.5	-47.8	-22.8	-33.2	-30.3					-5.2	10.2	-18.8	-5	-19.8	33.2	-39.5	-35.9
35.8	-3.8	-28.6	26.7	-39.2	3	6.5	-46.8					-12	14.5	-18.2	-13	-28.4	33.8	-55.3	-25.7
74.7	17.5	-40.1	34.1	-19.9	39.8	-29.9	-37.7					-21.8	22.3	-17.6	-12.8			-61.5	-18.8
73.7	-47	-59.9	31.3	-3.8	51.3	-31.7	-22.6					-23.7	28.5	-17.6	-13.3			-67.5	-15.5
46.8	-5.2	-84.9	31	20.4	70.4	-44.1	-22.6					-31.5	30	-20.3	-14.1			-66	-15.4
37.4	4.6	-105.2	24.1	62	59.2	-25.1	-13.4					-29.3	36.2	-20.1	-13.9			-63.3	-16.7
14.6	-5.6	-137.9	28.6	75	77.6	-37	-24.1					-30.9	36.8	-20.4	-14			-64.7	-17.2
14.4	10.4	-143.9	5.9	62.8	78.3	-17.1	-21					-30.8	37	-17.3	-13.2			-64	-17.4
12	4.2	-125.9	-12.7	60.5	76.2	-5.8	-40.5					-31.9	36.9	-13.5	-12.1			-64.8	-17.3
3.4	28.8	-95.3	6.2	59.4	77.1	5	-51.5					-31.5	36.7	-12.4	-17.9			-62.6	-18.6
-1	38	-33.8	-6.2	59	53	25.4	-54.6					-31.2	36.3	-14.5	-17.9			-61.6	-20.4
-19.9	29.6	-43	8.2	71.4	28.3	43.2	-53.4					-30.8	36.4	-14.5	-12.7			-62.6	-20.1
-25.2	23.6	-16.6	19.5	59.6	21.2	62.2	-63					-30.4	36	-20.9	-8.1			-61	-20.6
-16.5	19.4	6	54.1	33.7	1.6	62.1	-61.7					-30.5	36.3	-17.8	-2.6			-61.5	-18
-45.8	0.6	39.9	63.4	20.5	-1.6	59	-61.2					-30.6	36.6	-20.2	-6.8			-71.4	-39.5
-27.9	6	72.4	51.8	6.3	16.1	54.9	-64.5					-30.3	36.1	-20.1	-12.3			-63.6	-26.1
-59.6	-19.5	79.3	32.9	0.8	9.4	55.4	-63.2					-29.8	36.3	-18.2	-16.8			-77.3	-30.2
-36.8	28.6	71	19.2	-15.6	51.1	58.9	-61.6					-30.5	36.4	-18.4	-17.7			-91	-39
-71.6	-18.4	67.9	4.8	-38	86.1	57.7	-63.4					-31	36.4	-19.8	-17.4			-101.6	-34.3
		54.5	3.9	-55.1	111.7	59.4	-64.7					-31.8	35.7	-19.5	-18			-102.1	-40
		33	7.3	-59.2	136.8	67.6	-62.1					-30.1	36.2	-18.1	-22.5			-105.5	-41.6
		36	6.3	-58.8	172.9	68.6	-57.9					-30.3	36.2	-19.8	-16.1			-111.5	-42
		37.5	5.7	-101.8	183.6	63.8	-54.8					-31.1	36.5	-18.9	-14.7			-117	-45.3
		36.5	4.8			61.3	-42.3					-30.6	36.9	-19.2	-13			-119.9	-49.1
		34.7	5.4			60	-37.5					-31.4	36.6	-17.2	-14.8			-122.9	-53.4
		36.2	6.2			66.8	-29.9					-31.7	37.5	-14.1	-16.2			-126.9	-55.9
		36.4	6.1			75	-26.9					-30.5	37	-10	-18.1			-125.8	-62.1
		34.4	5.5			88.1	-42					-29.5	41.9	-10.7	-23.8			-127.7	-65.7
		32.1	5.9			108.2	-44.7					-33.1	75.5	-15	-21.6			-125.6	-64.8
		32.8	5.3			109.1	-37.4					-49.4	102.2	-11.8	-29.7			-126.1	-67.9
		35	5.8			108.7	-39.1					-62.9	108.5	-14.9	-27.3			-124.9	-68
		36.3	5.7			103.5	-43.6					-61.6	107	-17.4	-34.5			-120.5	-67.9
		35.6	5.9			97	-43.7					-61.8	107.2	-25.3	-43.9			-121.1	-64.3
		36.4	5.6			96	-42.1					-65.9	102.5	-31.8	-48.1			-114.8	-59.7
		37.7	5.7			88.2	-43					-75.7	101.3	-32.7	-52.5			-113.6	-57.7
		37.9	5.9			87.9	-43.3					-75.3	108	-32.7	-57.2			-112.8	-58.9
		38.1	5.3			89.2	-43.3					-70.7	113.3	-31.9	-59.9			-110	-59.4
		40.4	5.3			87.8	-44.7					-68.5	119.9	-29.4	-63.8			-109.7	-61
		40.7	5.2			89.6	-43.6					-57.2	129.8	-29.5	-69.3			-110.2	-62.9
		40.2	5			86.1	-43.5					-54.2	130.5	-25.6	-70.9			-109.6	-60.2
