# Supplementary material for: ERK3/MAPK6 dictates CDC42/RAC1 activity and ARP2/3-dependent actin polymerization
Source: eLife journal article supplement (doi:10.7554/elife.85167), 2023-04-14
Supplement: fig1-data3 [file Figure 1G-source data.xlsx]

## Sheet: Results 2021
mouse	movie	comments	GFP cells	condition		shCTRL	shERK3
m1	tsz1	ghosts cells	0	shERK3	movies per mice	4	4				condition
	tsz001		3	shERK3		4	5			3	shCTRL		0	shERK3
	tsz002	ghosts cells	1	shERK3		6	4			6	shCTRL		3	shERK3
	tsz003	water run out half way	0	shERK3			5			2	shCTRL		1	shERK3
m2	tsz001	bad movie z shift	0	shERK3			4			0	shCTRL		0	shERK3
	tsz002	breathing movement	2	shERK3		4.66667	4.4			3	shCTRL		0	shERK3
	tsz003	breathing but beautiful contrast	1	shERK3						8	shCTRL		2	shERK3
	tsz004		2	shERK3						2	shCTRL		1	shERK3
	tsz005		1	shERK3						20	shCTRL		2	shERK3
m3	tsz016		3	shCTRL						0	shCTRL		1	shERK3
	tsz017		6	shCTRL						0	shCTRL		0	shERK3
	tsz018	water loss		shCTRL						0	shCTRL		0	shERK3
	tsz019	weak signal	2	shCTRL						7	shCTRL		0	shERK3
	tsz020	until t9	0	shCTRL						2	shCTRL		2	shERK3
m4	tsz001	too many breathing mvt, possible underest.	3	shCTRL						7	shCTRL		1	shERK3
	tsz002	too many breathing mvt, underest.	8	shCTRL									0	shERK3
	tsz003	too many breathing mvt	2	shCTRL									1	shERK3
	tsz004		20	shCTRL									2	shERK3
m5	tsz001		0	shERK3									2	shERK3
	tsz002	half FOV	0	shERK3									1	shERK3
	tsz003		0	shERK3									1	shERK3
	tsz004	bad movie		shERK3									0	shERK3
	tsz005		2	shERK3									5	shERK3
	tsz006	bad movie		shERK3
m6	tsz001	loss water		shERK3
	tsz002	ghosts	1	shERK3						expt dec2021
	tsz003	shift then stable	0	shERK3							average	st dev	mice	movie per mice	movies
	tsz004		1	shERK3						shCTRL	4.28571	5.34111	3	4.6	14
	tsz005		2	shERK3						shERK3	1.13636	1.24577	5	4.3	22
	tsz006		2	shERK3						t.test	0.0114303
m7	tsz001		0	shCTRL
	tsz002		0	shCTRL
	tsz003		0	shCTRL
	tsz004		7	shCTRL
	tsz005		2	shCTRL
	tsz006		7	shCTRL
m8	tsz001	big drift, not confident	1	shERK3
	tsz002	artefact but okish, ghost cells clear	1	shERK3
	tsz003	slight shift	0	shERK3
	tsz004	stable in z	5	shERK3
m9	tsz001	too big shift in z		shCTRL
	tsz002	lesser shift deep in, but tough to quantify		shCTRL
	tsz003	lesser shift deep in, but tough to quantify		shCTRL
	tsz004	too big shift in z		shCTRL
	tsz005	too big shift in z		shCTRL
	tsz006	too big shift in z		shCTRL

## Sheet: Combined results 2017&2021
mouse	movie	GFP cells	condition	year expt	average per mice
ctrl m1	tsz1	30	shCTRL	2017	18
ctrl m1	tsz2	13	shCTRL	2017
ctrl m1	tsz3	11	shCTRL	2017			Data presented as average moving cells per FOV
ctrl m2	tsz1	9	shCTRL	2017	20.5
ctrl m2	tsz2	20	shCTRL	2017				average	st dev	sem	mice	av movie per mice	movies
ctrl m2	tsz3	30	shCTRL	2017			shCTRL	10.7407	10.7223	4.05267	7	3.85	27
ctrl m2	tsz4	23	shCTRL	2017			shERK3	2.84848	3.04263	1.07573	8	4.125	33
ctrl m3	tsz2	3	shCTRL	2017	3		t.test	0.000158655
ctrl m4	tsz2	7	shCTRL	2017	18.2
ctrl m4	tsz3	1	shCTRL	2017
ctrl m4	tsz6	29	shCTRL	2017
ctrl m4	tsz7	24	shCTRL	2017				ctrl	sh
ctrl m4	tsz8	30	shCTRL	2017			1	3	4
m3_ctrl	tsz016	3	shCTRL	2021	2.75		2	4	4
m3_ctrl	tsz017	6	shCTRL	2021			3	1	3
m3_ctrl	tsz019	2	shCTRL	2021			4	5	4
m3_ctrl	tsz020	0	shCTRL	2021			5	4	5
m4_ctrl	tsz001	3	shCTRL	2021	8.25		6	4	4
m4_ctrl	tsz002	8	shCTRL	2021			7	6	5
m4_ctrl	tsz003	2	shCTRL	2021			8		4
m4_ctrl	tsz004	20	shCTRL	2021				3.85714	4.125
m7_ctrl	tsz001	0	shCTRL	2021	2.66667
m7_ctrl	tsz002	0	shCTRL	2021			Data presented as average moving cells per mice per FOV
m7_ctrl	tsz003	0	shCTRL	2021				average	st dev	sem	mice	av movie per mice	movies
m7_ctrl	tsz004	7	shCTRL	2021			shCTRL	10.481	8.14733	3.0794	7	3.85	27
m7_ctrl	tsz005	2	shCTRL	2021			shERK3	3.09167	2.83008	1.00059	8	4.125	33
m7_ctrl	tsz006	7	shCTRL	2021			t.test	0.0311912
sh_m1	tsz1	2	shERK3	2017	4.75
sh_m1	tsz2	7	shERK3	2017
sh_m1	tsz3	7	shERK3	2017
sh_m1	tsz4	3	shERK3	2017
sh_m2	tsz2	3	shERK3	2017	7
sh_m2	tsz3	7	shERK3	2017
sh_m2	tsz4	11	shERK3	2017
sh_m2	tsz5	7	shERK3	2017
sh_m3	tsz1	6	shERK3	2017	7.33333
sh_m3	tsz2	8	shERK3	2017
sh_m3	tsz2b	8	shERK3	2017
m1_sh	tsz1	0	shERK3	2021	1
m1_sh	tsz001	3	shERK3	2021
m1_sh	tsz002	1	shERK3	2021
m1_sh	tsz003	0	shERK3	2021
m2_sh	tsz001	0	shERK3	2021	1.2
m2_sh	tsz002	2	shERK3	2021
m2_sh	tsz003	1	shERK3	2021
m2_sh	tsz004	2	shERK3	2021
m2_sh	tsz005	1	shERK3	2021
m5_sh	tsz001	0	shERK3	2021	0.5
m5_sh	tsz002	0	shERK3	2021
m5_sh	tsz003	0	shERK3	2021
m5_sh	tsz005	2	shERK3	2021
m6_sh	tsz002	1	shERK3	2021	1.2
m6_sh	tsz003	0	shERK3	2021
m6_sh	tsz004	1	shERK3	2021
m6_sh	tsz005	2	shERK3	2021
m6_sh	tsz006	2	shERK3	2021
m8_sh	tsz001	1	shERK3	2021	1.75
m8_sh	tsz002	1	shERK3	2021
m8_sh	tsz003	0	shERK3	2021
m8_sh	tsz004	5	shERK3	2021
