# Supplementary material for: ERK3/MAPK6 dictates CDC42/RAC1 activity and ARP2/3-dependent actin polymerization
Source: eLife journal article supplement (doi:10.7554/elife.85167), 2023-04-14
Supplement: fig1-figsupp1-data3 [file Figure 1-figure supplement 1D-source data.xlsx]

## Sheet: Sheet1
Transwell pics 20/12/16 set up on 15/12/20
4 fields pics taken
								CrC/Cr3
Rep1								Rep2
Field	-EGF		-/+ EGF		Fold	percentage		Field	-EGF		-/+ EGF		Fold	percentage
CrC 1	49		84					CrC 1	118		101
CrC 2	61		115					CrC 2	124		84
CrC 3	26		52					CrC 3	88		82
CrC 4	29		51					CrC 4	80		53
Average	41.25		75.5		1	100		Average	102.5		80		1	100
CrERK3 1	44		19					CrERK3 1	48		37
CrERK3 2	39		10					CrERK3 2	30		23
CrERK3 3	64		13					CrERK3 3	35		8
CrERK3 4	39		33					CrERK3 4	31		18
Average	46.5		18.75		0.248344	24.8344		Average	36		21.5		0.26875	26.875
Rep3
Field	-EGF	-/+ EGF		Fold	percentage
CrC 1		77
CrC 2		34
CrC 3		39
CrC 4		60
Average		52.5		1	100
CrERK3 1	13	21
CrERK3 2		35
CrERK3 3		18
CrERK3 4		12
Average		21.5		0.409524	40.9524
