# Supplementary material for: ERK3/MAPK6 dictates CDC42/RAC1 activity and ARP2/3-dependent actin polymerization
Source: eLife journal article supplement (doi:10.7554/elife.85167), 2023-04-14
Supplement: fig1-figsupp1-data4 [file Figure 1-figure supplement 1F-source data.xlsx]

## Sheet: Sheet1
Transwell pics 23/02/21
4 fields pics taken
						CrC/Cr3 New
Rep1						Rep2
Field	-EGF	-/+ EGF		Fold	Percentage	Field	-EGF	-/+ EGF	Fold	Percentage
shC 1	18	69		1		shC 1		82
shC 2		38		1		shC 2		45
shC 3		66		1		shC 3		92
shC 4		77		1		shC 4		155
Average		62.5		1	100	Average		93.5	1	100
shERK3 1	21	8				shERK3 1		35
shERK3 2		30				shERK3 2		43
shERK3 3		30				shERK3 3		34
shERK3 4		34				shERK3 4		49
Average		25.5		0.408	40.8	Average		40.25	0.430481	43.0481
						CrC/Cr3 New
						Rep2
						Field	-EGF	-/+ EGF
						CrC 1	23	96
						CrC 2		81
						CrC 3		57
						CrC 4		41
						Average		68.75		1	100
						CrERK3 1	14	48
						CrERK3 2	21	43
						CrERK3 3		22
						CrERK3 4		19
								33		0.48	48
