# Supplementary material for: ERK3/MAPK6 dictates CDC42/RAC1 activity and ARP2/3-dependent actin polymerization
Source: eLife journal article supplement (doi:10.7554/elife.85167), 2023-04-14
Supplement: fig1-figsupp2-data3 [file Figure 1-figure supplement 2D-source data.xlsx]

## Sheet: Sheet1
WB 3 replicates loading f. 31/1/19
Rep 1	pERK3	ERK3	Actin	pERK3/ERK3	Ratio with control	ERK3/ponceau	Ratio with control
0	2474033	10643539	7732711	0.232445	1	1.37643	1
5'	12213439	13290761	6153903	0.918942	3.95338	2.15973	1.56908
15'	13896267	13163518	7352560	1.05567	4.54158	1.79033	1.30071
30'	6963711	12855518	6734447	0.54169	2.33041	1.90892	1.38686
WB run 16/01/19
Rep 3
	pERK3	ERK3	ponceau	pERK3/ERK3	Ratio with control	ERK3/ponceau	Ratio with control
0	3497640	10430518	5186024	0.335328	1	2.01127	1
5'	5682640	11010154	4627447	0.516127	1.53917	2.37931	1.18299
15'	14205983	13663104	4484012	1.03973	3.10065	3.04707	1.515
30'	10005397	14361882	4552477	0.696663	2.07756	3.15474	1.56853
WB run 16/01/19 Rep3
Rep4
	pERK3	ERK3	ponceau	pERK3/ERK3	Ratio with control	ERK3/ponceau	Ratio with control
0	3302154	11734418	7428702	0.281408	1	1.57961	1
5'	9638439	12683175	7716480	0.759939	2.70049	1.64365	1.04054
15'	10110731	11485539	5309530	0.880301	3.12821	2.16319	1.36945
30'	7011731	13095933	3926125	0.535413	1.90262	3.33559	2.11166
