# Supplementary material for: ERK3/MAPK6 dictates CDC42/RAC1 activity and ARP2/3-dependent actin polymerization
Source: eLife journal article supplement (doi:10.7554/elife.85167), 2023-04-14
Supplement: fig1-figsupp2-data4 [file Figure 1-figure supplement 2F and 2G-source data.xlsx]

## Sheet: Sheet1
WB run 14/12/18
Rep1
		ERK3	Actin	ERK3/Actin	Ratio with each 0	Ratio with control
	0	6704477	2640042	2.53953	1	1
	0.5	6197276	2515761	2.46338	0.970013	0.970013
	1	4889648	2932770	1.66725	0.656516	0.656516
	2	3319305	2683891	1.23675	0.486999	0.486999
	4	2878184	3005012	0.957795	0.377154	0.377154
	6	603820	2325598	0.259641	0.10224	0.10224
EGF	0	9240326	2510184	3.68113	1	1.44953
	0.5	8586548	2699326	3.181	0.864135	1.25259
	1	8603083	2955477	2.91089	0.79076	1.14623
	2	6836276	3503062	1.95151	0.530139	0.768454
	4	3461477	3181811	1.0879	0.295533	0.428384
	6	4570426	2503991	1.82526	0.495841	0.718737
WB run 14/08/20 Rep1
Rep2
		ERK3	Actin	ERK3/Actin	Ratio with each 0	Ratio with control
	0	7672376	6162305	1.24505	1	1
	0.5	7463062	7511225	0.993588	0.798031	0.798031
	1	6671184	7965548	0.837505	0.672668	0.672668
	2	4848184	7605669	0.637443	0.511982	0.511982
	4	3364234	7910770	0.425273	0.341571	0.341571
	6	2530598	7208648	0.35105	0.281957	0.281957
EGF	0	11262205	7447820	1.51215	1	1.21453
	0.5	8873255	6878426	1.29001	0.853099	1.03611
	1	7837184	7370770	1.06328	0.703158	0.854005
	2	4590355	6948891	0.660588	0.436854	0.530572
	4	2033698	6973184	0.291646	0.192868	0.234244
	6	1567113	9194062	0.170448	0.112719	0.136901
WB run 14/08/20 Rep2
Rep3
		ERK3	Ponceau S	ERK3/Actin	Ratio with each 0	Ratio with control
	0	7071012	2323640	3.04308	1	1
	0.5	7358477	2187418	3.364	1.10546	1.10546
	1	7580790	2179569	3.47811	1.14296	1.14296
	2	5269548	2371619	2.22192	0.730156	0.730156
	4	3346820	2364062	1.41571	0.465223	0.465223
	6	1805648	2316669	0.779416	0.256128	0.256128
EGF	0	11755326	3760326	3.12615	1	1.0273
	0.5	9836548	3555255	2.76676	0.88504	0.9092
	1	10322426	3422548	3.01601	0.964768	0.991105
	2	8034497	3450861	2.32826	0.74477	0.765101
	4	4377598	2884134	1.51782	0.485525	0.498778
	6	1887234	2493497	0.756862	0.242107	0.248716
WB run 14/12/18
HMEC
REp4
		ERK3	Ponceau S	ERK3/Actin	Ratio with each 0	Ratio with control
	0	8653598	5461882	1.58436	1	1
	0.5	8694477	4917912	1.76792	1.11586	1.11586
	1	10419376	6652548	1.56622	0.988551	0.988551
	2	6760962	5521255	1.22453	0.772888	0.772888
	4	3973255	4514912	0.880029	0.555447	0.555447
	6	1246255	3964690	0.314339	0.198401	0.198401
EGF	0	10026933	4894619	2.04856	1	1.29299
	0.5	10631770	4724418	2.25039	1.09852	1.42037
	1	9569134	4021619	2.37942	1.16151	1.50182
	2	7523790	4285569	1.75561	0.856996	1.10809
	4	3909912	3147305	1.2423	0.606428	0.784104
	6	1138062	2889669	0.393838	0.192251	0.248578
