# Supplementary material for: ERK3/MAPK6 dictates CDC42/RAC1 activity and ARP2/3-dependent actin polymerization
Source: eLife journal article supplement (doi:10.7554/elife.85167), 2023-04-14
Supplement: fig1-figsupp2-data5 [file Figure 1-figure supplement 2H-source data.xlsx]

## Sheet: HMEC EGF Rep1
					DCT=CTGP-CTHGPRT
Spezies Name	Gen	Cycle	Mean	Stabw		DCTS/DCTC	Relative Expression
HMEC T 0	18s	9.71905	9.70709	0.0502169	0
		9.76173
		9.64048
	ERK3#1	23.5231	24.0171	0.352595	-14.31	0	1
		24.3229
		24.2053
5' EGF	HGPRT	9.87617	9.85416	0.0360931	0
		9.88305
		9.80327
	ERK3#1	24.3626	24.144	0.35559	-14.2899	-0.0201454	1.01406
		24.4269
		23.6425
15' EGF	HGPRT	9.88955	9.8154	0.0602433	0
		9.74199
		9.81468
	ERK3#1	24.0152	24.0674	0.0385912	-14.252	-0.0579755	1.041
		24.0799
		24.1072
30' EGF	HGPRT	10.3444	10.0043	0.251773	0
		9.92556
		9.74297
	ERK3#1	23.9047	23.949	0.0952819	-13.9447	-0.365278	1.28813
		24.0814
		23.861
x	x	x	x	x	x	x	x
								x	x	x

## Sheet: HMEC EGF Rep2
					DCT=CTGP-CTHGPRT
Spezies Name	Gen	Cycle	Mean	Stabw		DCTS/DCTC	Relative Expression
HMEC T 0	18s	9.76339	9.72167	0.0356019	0
		9.72521
		9.6764
	ERK3#1	24.0223	24.0984	0.0564452	-14.3767	0	1
		24.1572
		24.1157
5' EGF	HGPRT	9.55202	9.57244	0.0464049	0
		9.52865
		9.63667
	ERK3#1	24.0015	23.9451	0.0411518	-14.3727	-0.00404962	1.00281
		23.9044
		23.9295
15' EGF	HGPRT	9.87166	9.83522	0.0630157	0
		9.88743
		9.74657
	ERK3#1	23.9338	24.0032	0.0741592	-14.168	-0.208717	1.15566
		24.106
		23.9698
30' EGF	HGPRT	9.73342	9.7154	0.0391475	0
		9.66105
		9.75172
	ERK3#1	24.0018	23.9977	0.00705696	-14.2823	-0.0944716	1.06767
		24.0034
		23.9877
x	x	x	x	x	x	x	x
								x	x	x

## Sheet: HMEC EGF Rep3
					DCT=CTGP-CTHGPRT
Spezies Name	Gen	Cycle	Mean	Stabw		DCTS/DCTC	Relative Expression
HMEC T 0	18s	9.59109	9.613	0.0216006	0
		9.64239
		9.60552
	ERK3#1	24.0481	24.0673	0.0549577	-14.4543	0	1
		24.1421
		24.0116
5' EGF	HGPRT	10.1137	10.0442	0.0594219	0
		10.0502
		9.96857
	ERK3#1	26.983	24.8716	1.49347	-14.8275	0.373188	0.772074
		23.8625
		23.7694
15' EGF	HGPRT	9.90021	9.82535	0.0558271	0
		9.80964
		9.76619
	ERK3#1	24.1129	23.966	0.112173	-14.1407	-0.313584	1.24279
		23.9446
		23.8407
30' EGF	HGPRT	9.7869	9.89339	0.0753149	0
		9.94854
		9.94472
	ERK3#1	23.8452	23.9023	0.101162	-14.0089	-0.445379	1.36167
		24.0444
		23.8172
x	x	x	x	x	x	x	x
								x	x	x
