# Supplementary material for: ERK3/MAPK6 dictates CDC42/RAC1 activity and ARP2/3-dependent actin polymerization
Source: eLife journal article supplement (doi:10.7554/elife.85167), 2023-04-14
Supplement: fig2-data3 [file Figure 2E-source data.xlsx]

## Sheet: Sheet1
Rep1
run 29/1/19		Cdc42 GTP	CDc42	Cdc42 GTP/Total	Ratio siCo
	sho	2015640	11827033	0.170427	1
EGF	shCo	9484296	13371690	0.709282	4.1618
	sh3	1668962	9406983	0.177417	1.04102
EGF	sh3	688205	12385196	0.0555667	0.326045
Rep2
run 30/11/20
		Cdc42 GTP	CDc42	Cdc42 GTP/Total	Ratio siCo
	siCo	5387740	12396175	0.434629	1
EGF	siCo	12455359	13116640	0.949585	2.18482
	si3	905811	14183640	0.0638631	0.146937
EGF	si3	2069891	9660861	0.214255	0.492961
Rep3
Run 14/09/20
		Cdc42 GTP	CDc42	Cdc42 GTP/Total	Ratio shCo
	shC	4964752	9575669	0.518476	1
	shC+EGF	15873569	13037861	1.2175	2.34823
	sh3	1111305	7956912	0.139665	0.269377
	shERK3+EGF	2844376	11224983	0.253397	0.488734
