# Supplementary material for: ERK3/MAPK6 dictates CDC42/RAC1 activity and ARP2/3-dependent actin polymerization
Source: eLife journal article supplement (doi:10.7554/elife.85167), 2023-04-14
Supplement: fig2-data4 [file Figure 2F-source data.xlsx]

## Sheet: Sheet1
Rep1
Run 14/09/20
	Rac1 GTP	Rac1	Rac1 GTP/Rac1	Fold hange
shC	14623468	17544861	0.83349	1
shC+EGF	2650497	9837317	0.269433	0.323259
sh3	1772648	17795305	0.0996132	0.119513
sh3+EGF	919406	9532154	0.0964531	0.115722
Rep2
Run 23/11/20
	Rac1 GTP	Rac1	Rac1 GTP/Rac1	Fold hange
shC	13616087	14364468	0.947901	1
shC EGF	11073388	12271468	0.902369	0.951966
sh3	6796326	12659933	0.536837	0.566344
sh3 EGF	12473953	12156317	1.02613	1.08253
Rep3 Rac1
Run 15/12/20
	Rac1 GTP	Rac1	Rac1 GTP/Rac1	Fold hange
shC	14472296	15572296	0.929362	1
shC EGF	6691347	16201690	0.413003	0.444394
sh3	8555690	14766104	0.579414	0.623454
sh3 EGF	8633640	12621347	0.684051	0.736043
