# Supplementary material for: ERK3/MAPK6 dictates CDC42/RAC1 activity and ARP2/3-dependent actin polymerization
Source: eLife journal article supplement (doi:10.7554/elife.85167), 2023-04-14
Supplement: fig2-data7 [file Figure 2K-source data.xlsx]

## Sheet: Result sheet
Method name: Method 1
Application: SparkControl				V3.1
Device: Spark				Serial number: 2007011179
Firmware:				LUM:V5.2.4|ABS:V4.3.2|ABS_MEX:V5.1.1|MTP:V14.2.11|FLUOR:V5.1.4|FLUOR_BOTTOM:V5.0.2|PODI:V1.11.2
Date:				2021-02-16
Time:				3:52 PM
System				CBUMAINZ-HP
User				CBUMainz-HP\User
Plate				[GRE96ft] - Greiner 96 Flat Transparent Cat. No.: 655101/655161/655192
Lid lifter				No lid
Humidity Cassette				No humidity cassette
Smooth mode				Not selected
List of actions in this measurement script:
Plate
	Absorbance					Label 1
Name				GRE96ft
Plate layout
Plate area				A1-B12;C1-C11;D1-H8
Mode	Absorbance
Name	Label 1
Measurement wavelength [nm]				450
Reference wavelength [nm]				570
Number of flashes				10
Settle time [ms]				50
Part of Plate				A1-B12;C1-C11;D1-H8
Start Time				2021-02-16 15:52:13
Temperature [°C]				26.8
																		Abs
Difference															Coated	Interacting	Conc.	Rep1	Rep2	Rep3
<>	1	2	3	4	5	6	7	8	9	10	11	12			Cdc42 no tag	ERK3-GST	40nM	0.3888	0.3598	0.3621
A	0.7284	0.5788	0.4071	0.2922	0.7443	0.5633	0.464	0.3116	0.6862	0.7766	0.6694	0.8481				ERK3-GST	20nM	0.3052	0.2682	0.2788
B	0.932	0.6969	0.5274	0.3356	0.8702	0.6759	0.3998	0.3371	0.6171	0.7229	0.6863	0.8362				ERK3-GST	10nM	0.2111	0.203	0.2089
C	0.3465	0.2177	0.1598	0.0976	0.0116	0.0116	0.0115	0.0117	0.6327	0.6306	0.8002					ERK3-GST	5nM	0.114	0.1191	0.1346
D	0.3447	0.2363	0.1503	0.093	0.0109	0.0109	0.0111	0.0107							Cdc42 no tag	GST	40nM	0.0117	0.0115	0.0129
E	0.3661	0.2745	0.1813	0.106	0.0108	0.0107	0.0115	0.0114								GST	20nM	0.0116	0.0115	0.0113
F	0.3888	0.3052	0.2111	0.114	0.0117	0.0116	0.0114	0.0115								GST	10nM	0.0114	0.0115	0.012
G	0.3598	0.2682	0.203	0.1191	0.0115	0.0115	0.0115	0.0115								GST	5nM	0.0115	0.0115	0.0113
H	0.3621	0.2788	0.2089	0.1346	0.0129	0.0113	0.012	0.0113
End Time				2021-02-16 15:52:50
