# Supplementary material for: ERK3/MAPK6 dictates CDC42/RAC1 activity and ARP2/3-dependent actin polymerization
Source: eLife journal article supplement (doi:10.7554/elife.85167), 2023-04-14
Supplement: fig2-figsupp1-data2 [file Active MCF7.xlsx]

## Sheet: Sheet1
MCF7
	Cdc42 GTP	Cdc42 total	GTP/total	Ratio	Rac1 GTP	Rac1 total	GTP/total	Ratio
siCo	8023125	13344589	0.601227	1	6275882	12615296	0.497482	1
siCo eGF	11199560	16126933	0.694463	1.15508	7814933	12862569	0.607572	1.22129
si3	12002125	13746861	0.873081	1.45217	8079933	13464033	0.600112	1.2063
si3 EGF	3801882	13742589	0.27665	0.460142	3908104	15576803	0.250893	0.504325
