# Supplementary material for: ERK3/MAPK6 dictates CDC42/RAC1 activity and ARP2/3-dependent actin polymerization
Source: eLife journal article supplement (doi:10.7554/elife.85167), 2023-04-14
Supplement: fig2-figsupp1-data3 [file Active 468.xlsx]

## Sheet: Sheet1
468
	Cdc42 GTP	Cdc42 total	GTP/total	Ratio	Rac1 GTP	Rac1 total	GTP/total	Ratio
siCo	10710832	12412267	0.862923	1	16793154	15912125	1.05537	1
siCo eGF	3485891	12624296	0.276126	0.319989	10297861	13436569	0.766406	0.726197
si3	3114962	10837004	0.287438	0.333098	10151447	12740983	0.796755	0.754955
si3 EGF	5489012	13107154	0.41878	0.485304	11159054	13028175	0.856532	0.811596
