# Supplementary material for: ERK3/MAPK6 dictates CDC42/RAC1 activity and ARP2/3-dependent actin polymerization
Source: eLife journal article supplement (doi:10.7554/elife.85167), 2023-04-14
Supplement: fig2-figsupp2-data2 [file Figure 2-figure supplement 2B and 2C-source data.xlsx]

## Sheet: Sheet1
Calu1
	Cdc42 GTP	Cdc42 total	GTP/total	Ratio	Rac1 GTP	Rac1 total	GTP/total	Ratio
CrC	6281024	6672811	0.941286	1	5602154	14809418	0.378283	1
Cr3	8490903	16094731	0.527558	0.560465	11360267	14231104	0.79827	2.11025
CrC EGF	8420631	13483619	0.624508	0.663463	13976539	11183497	1.24975	3.30373
Cr3 EGF	290435	14062660	0.0206529	0.0219412	1102062	12208104	0.090273	0.238639
