# Supplementary material for: ERK3/MAPK6 dictates CDC42/RAC1 activity and ARP2/3-dependent actin polymerization
Source: eLife journal article supplement (doi:10.7554/elife.85167), 2023-04-14
Supplement: fig2-figsupp2-data3 [file Figure 2-figure supplement 2E and 2F-source data.xlsx]

## Sheet: Sheet1
Ht-29
	Cdc42 GTP	Cdc42 total	GTP/total	Ratio	Rac1 GTP	Rac1 total	GTP/total	Ratio
CrC	15882761	16380430	0.969618	1	16310368	11109640	1.46813	1
Cr3	803104	4226004	0.190039	0.195993	853941	4769175	0.179054	0.121961
CrC EGF	6270711	5776326	1.08559	1.1196	11915075	3029619	3.93286	2.67883
Cr3 EGF	125435	4659125	0.0269224	0.027766	1696397	5297652	0.320217	0.218112
