# Supplementary material for: ERK3/MAPK6 dictates CDC42/RAC1 activity and ARP2/3-dependent actin polymerization
Source: eLife journal article supplement (doi:10.7554/elife.85167), 2023-04-14
Supplement: fig2-figsupp2-data4 [file Figure 2-figure supplement 2H and 2I-source data.xlsx]

## Sheet: Sheet1
HUVEC
	Cdc42 GTP	Cdc42 total	GTP/total	Ratio	Rac1 GTP	Rac1 total	GTP/total	Ratio
siCo	17619004	15713832	1.12124	1	14869489	16712418	0.889727	1
si3	4516841	11860660	0.380825	0.339646	3313669	11341217	0.292179	0.328392
