# Supplementary material for: ERK3/MAPK6 dictates CDC42/RAC1 activity and ARP2/3-dependent actin polymerization
Source: eLife journal article supplement (doi:10.7554/elife.85167), 2023-04-14
Supplement: fig3-data2 [file Figure 3C-source data.xlsx]

## Sheet: Sheet1
Cdc42 GDP-GTP exchange -/+ERK3
Run 14/06/21
Rep1,2,3,4
		Cdc42 GTP	Pak1-PBD	Ratio	ratio with control
GTP	Control	10552882	18732246	0.563354	1
ERK3	2	19836882	11081397	1.79011	3.17759
	10	19293004	11614669	1.66109	2.94857
	2	18212933	12414004	1.46713	2.60427
	5	13611640	12167903	1.11865	1.9857
Rep 5
run 30/06/2021
	Cdc42	Pak1-PBD	ratio	fold
GDP	0	8025874	0
GTP	5944933	6991016	0.850368	1
GTP+ERK3	15357832	7508539	2.04538	2.40529
