# Supplementary material for: ERK3/MAPK6 dictates CDC42/RAC1 activity and ARP2/3-dependent actin polymerization
Source: eLife journal article supplement (doi:10.7554/elife.85167), 2023-04-14
Supplement: fig3-data3 [file Figure 3E-source data.xlsx]

## Sheet: Sheet1
Rep1
Run 15/06/21
Rep2 from rac1
	Rac1	Pak1-PBD	ratio	subtrac GDP
GDP	161778	8078397	0.020026
GTP	18180731	8121004	2.23873	2.2187	1
GTP+ERK3	9016731	10141953	0.889053	0.869027	0.391682
Rep2
Run 15/06/21
Rep3 from rac1
	Rac1	Pak1-PBD	ratio	subtrac GDP
GDP	0	5246418	0
GTP	19750418	6773225	2.91595	2.91595	1
GTP+ERK3	15123045	6167175	2.45218	2.45218	0.840954
Rep 3
Run 14/06/21		Rac1	Pak1-PBD	ratio
GTP		13213154	7050409	1.8741	1
GTP+ERK3	2	13822376	8485267	1.62899	0.869211
Rep4
Run 16/06/21
		Rac1	Pak1-PBD	ratio	GDP subtr
GDP		0	9649711	0
GTP	GTP	18622418	5644004	3.2995		1
GTP+ERK3	ERK3	12700175	7894004	1.60884		0.4876
Rep 5
run 30/06/2021
	Rac1	Pak1-PBD	ratio	Fold
GDP	0	14706894
GTP	15952933	13925338	1.1456	1
GTP+ERK3	10883790	11477497	0.948272	0.827748
