# Supplementary material for: ERK3/MAPK6 dictates CDC42/RAC1 activity and ARP2/3-dependent actin polymerization
Source: eLife journal article supplement (doi:10.7554/elife.85167), 2023-04-14
Supplement: fig3-data4 [file Figure 3F-source data.xlsx]

## Sheet: run 210720
Method name: Actin polymerization (Modified)
Application: SparkControl				V3.1
Device: Spark				Serial number: 2007011179
Firmware:				LUM:V5.2.4|ABS:V4.3.2|ABS_MEX:V5.1.1|MTP:V14.2.11|FLUOR:V5.1.4|FLUOR_BOTTOM:V5.0.2|PODI:V1.11.2
Date:				2021-07-20
Time:				3:24 PM
System				CBUMAINZ-HP
User				CBUMainz-HP\User
Plate				[GRE96fb_half area] - Greiner 96 Flat Black Cat. No.: 675077/675076
Lid lifter				No lid
Humidity Cassette				No humidity cassette
Smooth mode				Not selected
List of actions in this measurement script:
Plate
	Shaking
	Temperature
	Kinetic
		Fluorescence Top Reading				GEF
Name				GRE96fb_half area
Plate layout
Plate area				A1-D12
Start Time				2021-07-20 15:21:02
Shaking (Orbital) Duration [s]				5
Shaking (Orbital) Position				Current
Shaking (Orbital) Amplitude [mm]				1
Shaking (Orbital) Frequency [rpm]				510
End Time				2021-07-20 15:21:07
Start Time				2021-07-20 15:21:07
Temperature control				On
Target temperature [°C]				25
End Time				2021-07-20 15:21:07
Mode	Kinetic
Kinetic cycles				60
Interval time [hhmmss]				00:00:30
Mode	Fluorescence Top Reading
Name	GEF
Excitation				Filter
Excitation wavelength [nm]				485
Excitation bandwidth [nm]				20
Emission				Filter
Emission wavelength [nm]				535
Emission bandwidth [nm]				25
Gain Manual				40
Mirror				Automatic (Dichroic 510)
Number of flashes				3
Integration time [µs]				40
Lag time [µs]				0
Settle time [ms]				0
Z-Position [μm]				17500
Z-Position mode				Manual
Part of Plate				A1-D12
Start Time				2021-07-20 15:21:10
Cycles / Well
A4	1	2	3	4	5	6	7	8	9	10	11	12	13	14	15	16	17	18	19	20	21	22	23	24	25	26	27	28	29	30	31	32	33	34	35	36	37	38	39	40	41	42	43	44	45	46	47	48	49
Time [s]	0	30.006	60.013	90.017	120.027	150.034	180.051	210.073	240.081	270.086	300.092	330.097	360.11	390.118	420.127	450.135	480.143	510.148	540.162	570.175	600.183	630.188	660.195	690.206	720.21	750.235	780.256	810.264	840.283	870.293	900.298	930.305	960.322	990.345	1020.35	1050.36	1080.37	1110.39	1140.39	1170.41	1200.42	1230.43	1260.44	1290.44	1320.46	1350.46	1380.49	1410.49	1440.5
Temp. [°C]	26.9	27.1	27.3	27.3	27.2	27.1	27.2	27.2	27.3	27.5	27.5	27.6	27.6	27.4	27.4	27.5	27.3	27.2	27.2	27.3	27.3	27.5	27.6	27.8	27.7	27.4	27.2	27.1	27	27.1	27.3	27.4	27.6	27.7	27.7	27.6	27.4	27.4	27.3	27.2	27.2	27.4	27.5	27.8	27.8	27.6	27.5	27.3	27.1
Mean	6924.25	7374	7743.75	7796.75	7571.75	7280	9666.75	10007.5	11048.8	10499.2	11364.5	11026.8	12139.5	12541	12160.5	11594.2	11842	11252.2	11415.5	13277.8	13594.8	12304.5	12485.5	13142	13142	12944.2	14483.8	13179	14708.5	13688	15218	14586.8	14759	14827	15947.8	15202	16001.5	16413.5	15397.8	16422.5	15811.5	16136.5	16385	17087.8	16984.8	17505.8	18065	18438.2	16918.2
Cycles / Well
A5	1	2	3	4	5	6	7	8	9	10	11	12	13	14	15	16	17	18	19	20	21	22	23	24	25	26	27	28	29	30	31	32	33	34	35	36	37	38	39	40	41	42	43	44	45	46	47	48	49
Time [s]	0	30.006	60.013	90.017	120.027	150.034	180.051	210.073	240.081	270.086	300.092	330.097	360.11	390.118	420.127	450.135	480.143	510.148	540.162	570.175	600.183	630.188	660.195	690.206	720.21	750.235	780.256	810.264	840.283	870.293	900.298	930.305	960.322	990.345	1020.35	1050.36	1080.37	1110.39	1140.39	1170.41	1200.42	1230.43	1260.44	1290.44	1320.46	1350.46	1380.49	1410.49	1440.5
Temp. [°C]	26.9	27.1	27.3	27.3	27.2	27.1	27.2	27.2	27.3	27.5	27.5	27.6	27.6	27.4	27.4	27.5	27.3	27.2	27.2	27.3	27.3	27.5	27.6	27.8	27.7	27.4	27.2	27.1	27	27.1	27.3	27.4	27.6	27.7	27.7	27.6	27.4	27.4	27.3	27.2	27.2	27.4	27.5	27.8	27.8	27.6	27.5	27.3	27.1
Mean	6715	7008.75	6777.5	6923.25	6888	6933.25	11470.5	10975.5	11661	12171.2	12284.8	16019.8	16279	16337	15770.8	16526.8	16389	17859.5	16448.8	18116.8	16683	17569.2	18056.2	18045	19728.8	19826.8	18792	18938.5	19601.8	19387.2	21200.8	19571.2	19749.5	20914.2	21476.2	21726	20986.5	21426.5	22876.2	23239.8	23426.5	23019.5	23136	24435.5	23727	24194.5	23568.8	24469.2	24265.8
Cycles / Well
A6	1	2	3	4	5	6	7	8	9	10	11	12	13	14	15	16	17	18	19	20	21	22	23	24	25	26	27	28	29	30	31	32	33	34	35	36	37	38	39	40	41	42	43	44	45	46	47	48	49
Time [s]	0	30.006	60.013	90.017	120.027	150.034	180.051	210.073	240.081	270.086	300.092	330.097	360.11	390.118	420.127	450.135	480.143	510.148	540.162	570.175	600.183	630.188	660.195	690.206	720.21	750.235	780.256	810.264	840.283	870.293	900.298	930.305	960.322	990.345	1020.35	1050.36	1080.37	1110.39	1140.39	1170.41	1200.42	1230.43	1260.44	1290.44	1320.46	1350.46	1380.49	1410.49	1440.5
Temp. [°C]	26.9	27.1	27.3	27.3	27.2	27	27.2	27.2	27.3	27.5	27.5	27.6	27.6	27.4	27.4	27.5	27.3	27.2	27.2	27.3	27.3	27.5	27.6	27.8	27.7	27.4	27.2	27.1	27	27.1	27.3	27.4	27.6	27.7	27.7	27.6	27.4	27.4	27.3	27.2	27.2	27.4	27.5	27.8	27.8	27.6	27.5	27.3	27.1
Mean	6280.75	6901.25	7544.25	6706.25	7405	6815	10724	10218.8	10918	11010.8	11714.5	11238.2	14555.8	15367.8	15807.5	14865.5	16371.5	15231	15446.8	17105.8	17639.8	16234	17827.5	18651	18919.2	18029.5	18812.2	18780.2	19296	18330.8	19181.5	19167.8	20797.8	20864.8	20687.2	19649.8	19520	20232.8	20996.2	20916	21717.5	21894	21542	22814	22178.5	23724	22481	22658.8	24039.5
Cycles / Well
A10	1	2	3	4	5	6	7	8	9	10	11	12	13	14	15	16	17	18	19	20	21	22	23	24	25	26	27	28	29	30	31	32	33	34	35	36	37	38	39	40	41	42	43	44	45	46	47	48	49
Time [s]	0	30.006	60.013	90.017	120.027	150.034	180.051	210.073	240.081	270.086	300.092	330.097	360.11	390.118	420.127	450.135	480.143	510.148	540.162	570.175	600.183	630.188	660.195	690.206	720.21	750.235	780.256	810.264	840.283	870.293	900.298	930.305	960.322	990.345	1020.35	1050.36	1080.37	1110.39	1140.39	1170.41	1200.42	1230.43	1260.44	1290.44	1320.46	1350.46	1380.49	1410.49	1440.5
Temp. [°C]	27	27.1	27.3	27.3	27.2	27	27.2	27.2	27.3	27.5	27.5	27.6	27.6	27.4	27.4	27.5	27.3	27.2	27.2	27.3	27.3	27.5	27.6	27.8	27.7	27.4	27.2	27.1	27	27.1	27.3	27.4	27.6	27.7	27.7	27.6	27.4	27.4	27.3	27.2	27.2	27.4	27.5	27.8	27.8	27.6	27.5	27.3	27.1
Mean	7564.25	7711.5	7473	7582.5	8059.25	8684.5	5076.25	5244.25	5049.25	4965.75	5288.75	5078	5109.5	5229.75	4919.75	5272.25	5739	5776.75	4941.25	5681.25	5558	5448.25	5447.75	5339.75	5537.25	5557.25	5548.5	5789.25	5287.25	5173.75	5616.5	5172.5	6061.75	5664.25	5878	5781.25	6139.5	5261.5	5841.5	6323.5	5831	5986.5	6234	5519.5	6117.5	5769.25	5945	5842.5	6321.75
Cycles / Well
B4	1	2	3	4	5	6	7	8	9	10	11	12	13	14	15	16	17	18	19	20	21	22	23	24	25	26	27	28	29	30	31	32	33	34	35	36	37	38	39	40	41	42	43	44	45	46	47	48	49
Time [s]	0	30.006	60.013	90.017	120.027	150.034	180.051	210.073	240.081	270.086	300.092	330.097	360.11	390.118	420.127	450.135	480.143	510.148	540.162	570.175	600.183	630.188	660.195	690.206	720.21	750.235	780.256	810.264	840.283	870.293	900.298	930.305	960.322	990.345	1020.35	1050.36	1080.37	1110.39	1140.39	1170.41	1200.42	1230.43	1260.44	1290.44	1320.46	1350.46	1380.49	1410.49	1440.5
Temp. [°C]	27	27.2	27.3	27.3	27.2	27	27.2	27.3	27.3	27.6	27.6	27.6	27.5	27.4	27.5	27.5	27.3	27.2	27.2	27.3	27.4	27.5	27.7	27.8	27.6	27.4	27.3	27.1	27.1	27.2	27.3	27.4	27.7	27.7	27.7	27.6	27.4	27.4	27.3	27.2	27.3	27.4	27.7	27.8	27.8	27.6	27.4	27.3	27.1
Mean	7016.25	6634.5	6954.5	7113.25	7158.25	7752.75	9512.25	10038.5	13190.8	13135	13612.2	14767	14434.8	14953	14577.5	15626.2	14766.5	14214.8	16831	15774.2	15831.2	16258.8	16076	17342.2	17914	17220.2	18193.2	17322.5	18157	16903.5	18613.2	18754.2	18218.2	18648.8	19602	20070.5	18827.8	20715.8	20389.8	20908.5	19856.8	20327.8	21354.2	19779	21094.5	21420	20297.2	21799.2	21119.2
Cycles / Well
B6	1	2	3	4	5	6	7	8	9	10	11	12	13	14	15	16	17	18	19	20	21	22	23	24	25	26	27	28	29	30	31	32	33	34	35	36	37	38	39	40	41	42	43	44	45	46	47	48	49
Time [s]	0	30.006	60.013	90.017	120.027	150.034	180.051	210.073	240.081	270.086	300.092	330.097	360.11	390.118	420.127	450.135	480.143	510.148	540.162	570.175	600.183	630.188	660.195	690.206	720.21	750.235	780.256	810.264	840.283	870.293	900.298	930.305	960.322	990.345	1020.35	1050.36	1080.37	1110.39	1140.39	1170.41	1200.42	1230.43	1260.44	1290.44	1320.46	1350.46	1380.49	1410.49	1440.5
Temp. [°C]	27	27.2	27.3	27.3	27.2	27	27.2	27.3	27.3	27.6	27.5	27.6	27.6	27.4	27.4	27.5	27.3	27.2	27.2	27.3	27.4	27.5	27.7	27.8	27.6	27.4	27.2	27.1	27	27.2	27.3	27.4	27.6	27.7	27.7	27.6	27.4	27.4	27.2	27.2	27.2	27.4	27.7	27.8	27.8	27.6	27.4	27.3	27.1
Mean	6320.5	6191.75	6623.25	6780	6452.75	6589.25	8113.25	8083.25	8706.5	11524.8	11422	11972.8	12274.2	11901.2	11732	12611	12164.5	12899.2	13159	12873	14002.8	13326	14768.2	13353.8	13611.8	14594	14059	14803	14871.5	14915	14860.8	15478.8	15161.8	16339.8	16229.8	16166	16940	17810	15484.2	16475	17276.8	17535.5	17598.2	18305.8	18148.5	17714	17680.2	18102.8	17477.5
Cycles / Well
D2	1	2	3	4	5	6	7	8	9	10	11	12	13	14	15	16	17	18	19	20	21	22	23	24	25	26	27	28	29	30	31	32	33	34	35	36	37	38	39	40	41	42	43	44	45	46	47	48	49
Time [s]	0	30.006	60.013	90.017	120.027	150.034	180.051	210.073	240.081	270.086	300.092	330.097	360.11	390.118	420.127	450.135	480.143	510.148	540.162	570.175	600.183	630.188	660.195	690.206	720.21	750.235	780.256	810.264	840.283	870.293	900.298	930.305	960.322	990.345	1020.35	1050.36	1080.37	1110.39	1140.39	1170.41	1200.42	1230.43	1260.44	1290.44	1320.46	1350.46	1380.49	1410.49	1440.5
Temp. [°C]	27	27.3	27.3	27.2	27.1	26.9	27.2	27.2	27.3	27.6	27.6	27.5	27.5	27.4	27.5	27.5	27.3	27.2	27.2	27.3	27.4	27.5	27.8	27.8	27.5	27.3	27.3	27	27.1	27.2	27.4	27.5	27.7	27.7	27.7	27.5	27.4	27.3	27.3	27.2	27.3	27.4	27.8	27.8	27.7	27.5	27.4	27.3	27.1
Mean	4863.75	4884.25	4951.75	5156	4997	4927	4818.75	4896.75	4702.75	4784.25	4595.5	4815.75	4932.75	5028	4904	4939	4801.5	4850.25	4860.5	4698.75	4790	5008	4702	4943.25	4813.5	5035.25	5165.25	5186.5	4977.25	4987.75	5050	5080.5	5683.5	4930.75	5189	5232.25	5268.75	5172.5	4883.75	5057	4855.25	5279.5	5000	4961	4868.5	4857	5008	5787.5	4919.75
[truncated: 17 more columns]

## Sheet: run 210721 run2
Method name: Actin polymerization (Modified)
Application: SparkControl				V3.1
Device: Spark				Serial number: 2007011179
Firmware:				LUM:V5.2.4|ABS:V4.3.2|ABS_MEX:V5.1.1|MTP:V14.2.11|FLUOR:V5.1.4|FLUOR_BOTTOM:V5.0.2|PODI:V1.11.2
Date:				2021-07-21
Time:				12:14 PM
System				CBUMAINZ-HP
User				CBUMainz-HP\User
Plate				[GRE384sb] - Greiner 384 Flat Black Cat. No.: 784 076
Lid lifter				No lid
Humidity Cassette				No humidity cassette
Smooth mode				Not selected
List of actions in this measurement script:
Plate
	Shaking
	Temperature
	Kinetic
		Fluorescence Top Reading				GEF
Name				GRE384sb
Plate layout
Plate area				E1-H16
Start Time				2021-07-21 11:14:14
Shaking (Orbital) Duration [s]				5
Shaking (Orbital) Position				Current
Shaking (Orbital) Amplitude [mm]				1
Shaking (Orbital) Frequency [rpm]				510
End Time				2021-07-21 11:14:19
Start Time				2021-07-21 11:14:19
Temperature control				On
Target temperature [°C]				25
End Time				2021-07-21 11:14:19
Mode	Kinetic
Kinetic cycles				60
Interval time [hhmmss]				00:00:30
Mode	Fluorescence Top Reading
Name	GEF
Excitation				Filter
Excitation wavelength [nm]				485
Excitation bandwidth [nm]				20
Emission				Filter
Emission wavelength [nm]				535
Emission bandwidth [nm]				25
Gain Manual				50
Mirror				Automatic (Dichroic 510)
Number of flashes				3
Integration time [µs]				40
Lag time [µs]				0
Settle time [ms]				0
Z-Position [μm]				17500
Z-Position mode				Manual
Part of Plate				E1-H16
Start Time				2021-07-21 11:14:22
Cycles / Well
H4	1	2	3	4	5	6	7	8	9	10	11	12	13	14	15	16	17	18	19	20	21	22	23	24	25	26	27	28	29	30	31	32	33	34	35	36	37	38	39	40	41	42	43	44	45	46	47	48	49
Time [s]	0	30.015	60.028	90.062	120.092	150.108	180.051	210.073	240.081	270.086	300.092	330.097	360.11	390.118	420.127	450.135	480.143	510.148	540.162	570.175	600.183	630.188	660.195	690.206	720.21	750.235	780.256	810.264	840.283	870.293	900.298	930.305	960.322	990.345	1020.35	1050.36	1080.37	1110.39	1140.39	1170.41	1200.42	1230.43	1260.44	1290.44	1320.46	1350.46	1380.49	1410.49	1440.5
Temp. [°C]	27.5	27.7	27.8	27.7	27.6	27.5	27.4	27.4	27.6	27.7	27.9	28	28	27.9	27.6	27.5	27.3	27.2	27.4	27.5	27.7	28	27.9	27.9	27.7	27.5	27.4	27.3	27.3	27.5	27.6	27.8	27.9	27.8	27.7	27.5	27.6	27.4	27.4	27.4	27.7	27.9	27.9	27.8	27.7	27.6	27.5	27.3	27.3
Mean	7016.25	6634.5	6954.5	7113.25	7158.25	6930.5	8720	8933	9187	9212	9492	9315	9796	9738	9621	9806	9856	10011	10215	10346	10486	10656	10839	10917	11053	11115	11416	11702	11593	11803	11974	12063	12182	12427	12434	14159	12499	12723	12948	12979	13250	13345	13447	13466	13408	13725	13924	14023	14162
Cycles / Well
H6	1	2	3	4	5	6	7	8	9	10	11	12	13	14	15	16	17	18	19	20	21	22	23	24	25	26	27	28	29	30	31	32	33	34	35	36	37	38	39	40	41	42	43	44	45	46	47	48	49
Time [s]	0	30.015	60.028	90.062	120.092	150.108	180.051	210.073	240.081	270.086	300.092	330.097	360.11	390.118	420.127	450.135	480.143	510.148	540.162	570.175	600.183	630.188	660.195	690.206	720.21	750.235	780.256	810.264	840.283	870.293	900.298	930.305	960.322	990.345	1020.35	1050.36	1080.37	1110.39	1140.39	1170.41	1200.42	1230.43	1260.44	1290.44	1320.46	1350.46	1380.49	1410.49	1440.5
Temp. [°C]	27.5	27.7	27.8	27.7	27.6	27.5	27.4	27.4	27.6	27.7	27.9	28	28	27.9	27.6	27.5	27.3	27.2	27.4	27.5	27.7	28	27.9	27.9	27.7	27.5	27.4	27.3	27.3	27.5	27.6	27.8	27.9	27.8	27.7	27.5	27.6	27.4	27.4	27.4	27.7	27.9	27.9	27.8	27.7	27.6	27.5	27.3	27.3
Mean	6715	7008.75	6777.5	6923.25	6888	6994.25	9490	10565	11425	12053	12553	13184	13804	13849	13924	14246	14527	14605	14633	15084	15239	15174	15392	15313	15394	15562	15659	15940	15799	15763	17291	16156	16351	16183	16200	16039	16812	16940	16422	16446	16590	16600	16419	16298	16244	16506	16303	16423	16385
[truncated: 17 more columns]

## Sheet: run 210721 run1
Method name: Actin polymerization (Modified)
Application: SparkControl				V3.1
Device: Spark				Serial number: 2007011179
Firmware:				LUM:V5.2.4|ABS:V4.3.2|ABS_MEX:V5.1.1|MTP:V14.2.11|FLUOR:V5.1.4|FLUOR_BOTTOM:V5.0.2|PODI:V1.11.2
Date:				2021-07-21
Time:				10:17 AM
System				CBUMAINZ-HP
User				CBUMainz-HP\User
Plate				[GRE384sb] - Greiner 384 Flat Black Cat. No.: 784 076
Lid lifter				No lid
Humidity Cassette				No humidity cassette
Smooth mode				Not selected
List of actions in this measurement script:
Plate
	Shaking
	Temperature
	Kinetic
		Fluorescence Top Reading				GEF
Name				GRE384sb
Plate layout
Plate area				A1-D19
Start Time				2021-07-21 09:17:55
Shaking (Orbital) Duration [s]				5
Shaking (Orbital) Position				Current
Shaking (Orbital) Amplitude [mm]				1
Shaking (Orbital) Frequency [rpm]				510
End Time				2021-07-21 09:18:00
Start Time				2021-07-21 09:18:00
Temperature control				On
Target temperature [°C]				25
End Time				2021-07-21 09:18:00
Mode	Kinetic
Kinetic cycles				60
Interval time [hhmmss]				00:00:30
Mode	Fluorescence Top Reading
Name	GEF
Excitation				Filter
Excitation wavelength [nm]				485
Excitation bandwidth [nm]				20
Emission				Filter
Emission wavelength [nm]				535
Emission bandwidth [nm]				25
Gain Manual				40
Mirror				Automatic (Dichroic 510)
Number of flashes				3
Integration time [µs]				40
Lag time [µs]				0
Settle time [ms]				0
Z-Position [μm]				17500
Z-Position mode				Manual
Part of Plate				A1-D19
Start Time				2021-07-21 09:18:02
Cycles / Well
D2	1	2	3	4	5	6	7	8	9	10	11	12	13	14	15	16	17	18	19	20	21	22	23	24	25	26	27	28	29	30	31	32	33	34	35	36	37	38	39	40	41	42	43	44	45	46	47	48	49
Time [s]	0	30.015	60.028	90.062	120.092	150.108	180.051	210.073	240.081	270.086	300.092	330.097	360.11	390.118	420.127	450.135	480.143	510.148	540.162	570.175	600.183	630.188	660.195	690.206	720.21	750.235	780.256	810.264	840.283	870.293	900.298	930.305	960.322	990.345	1020.35	1050.36	1080.37	1110.39	1140.39	1170.41	1200.42	1230.43	1260.44	1290.44	1320.46	1350.46	1380.49	1410.49	1440.5
Temp. [°C]	26.8	26.9	26.9	26.9	27	27	27.2	27.3	27.3	27.3	27.1	27	26.9	26.8	26.7	26.9	27	27	27	26.9	26.8	26.8	26.8	26.9	27	26.8	26.8	26.6	26.6	26.7	26.8	26.9	27.1	27	26.9	26.7	26.5	26.3	26.4	26.4	26.6	26.8	27	27	26.9	26.6	26.5	26.4	26.5
Mean	5188	5260	5349	5449	5528	5623	5701	5880	5936	6059	6118	6298	6346	6490	6657	6729	6871	6971	7251	7286	7387	7446	7555	7733	7835	8078	8111	8132	8261	8519	8581	8694	8874	9025	9038	9212	9269	9391	9527	9657	9803	9932	10017	10127	10355	10351	10552	10669	10747
Cycles / Well
D4	1	2	3	4	5	6	7	8	9	10	11	12	13	14	15	16	17	18	19	20	21	22	23	24	25	26	27	28	29	30	31	32	33	34	35	36	37	38	39	40	41	42	43	44	45	46	47	48	49
Time [s]	0	30.015	60.028	90.062	120.092	150.108	180.051	210.073	240.081	270.086	300.092	330.097	360.11	390.118	420.127	450.135	480.143	510.148	540.162	570.175	600.183	630.188	660.195	690.206	720.21	750.235	780.256	810.264	840.283	870.293	900.298	930.305	960.322	990.345	1020.35	1050.36	1080.37	1110.39	1140.39	1170.41	1200.42	1230.43	1260.44	1290.44	1320.46	1350.46	1380.49	1410.49	1440.5
Temp. [°C]	26.8	26.9	26.9	26.9	27	27	27.2	27.3	27.3	27.3	27.1	27	26.9	26.8	26.7	26.9	27	27	27	26.9	26.8	26.8	26.8	26.9	27	26.8	26.8	26.6	26.6	26.7	26.8	26.9	27.1	27	26.9	26.7	26.5	26.3	26.4	26.4	26.6	26.8	27	27	26.9	26.6	26.5	26.4	26.5
Mean	6555	6407.25	6348.5	6729.25	7204.5	7293	7626	8422	8925	9591	10241	10587	11030	11357	11568	12159	12480	12557	12964	13174	13297	13438	13683	13838	13980	14148	14281	14259	14489	14459	14676	14628	14564	14727	14690	14878	15060	15125	15198	15024	15634	15365	15469	15418	15522	15509	15699	15478	15767
[truncated: 77 more columns]
