# Supplementary material for: ERK3/MAPK6 dictates CDC42/RAC1 activity and ARP2/3-dependent actin polymerization
Source: eLife journal article supplement (doi:10.7554/elife.85167), 2023-04-14
Supplement: fig3-data5 [file Figure 3G-source data.xlsx]

## Sheet: run 210720
Method name: Actin polymerization (Modified)
Application: SparkControl				V3.1
Device: Spark				Serial number: 2007011179
Firmware:				LUM:V5.2.4|ABS:V4.3.2|ABS_MEX:V5.1.1|MTP:V14.2.11|FLUOR:V5.1.4|FLUOR_BOTTOM:V5.0.2|PODI:V1.11.2
Date:				2021-07-20
Time:				3:24 PM
System				CBUMAINZ-HP
User				CBUMainz-HP\User
Plate				[GRE96fb_half area] - Greiner 96 Flat Black Cat. No.: 675077/675076
Lid lifter				No lid
Humidity Cassette				No humidity cassette
Smooth mode				Not selected
List of actions in this measurement script:
Plate
	Shaking
	Temperature
	Kinetic
		Fluorescence Top Reading				GEF
Name				GRE96fb_half area
Plate layout
Plate area				A1-D12
Start Time				2021-07-20 15:21:02
Shaking (Orbital) Duration [s]				5
Shaking (Orbital) Position				Current
Shaking (Orbital) Amplitude [mm]				1
Shaking (Orbital) Frequency [rpm]				510
End Time				2021-07-20 15:21:07
Start Time				2021-07-20 15:21:07
Temperature control				On
Target temperature [°C]				25
End Time				2021-07-20 15:21:07
Mode	Kinetic
Kinetic cycles				60
Interval time [hhmmss]				00:00:30
Mode	Fluorescence Top Reading
Name	GEF
Excitation				Filter
Excitation wavelength [nm]				485
Excitation bandwidth [nm]				20
Emission				Filter
Emission wavelength [nm]				535
Emission bandwidth [nm]				25
Gain Manual				40
Mirror				Automatic (Dichroic 510)
Number of flashes				3
Integration time [µs]				40
Lag time [µs]				0
Settle time [ms]				0
Z-Position [μm]				17500
Z-Position mode				Manual
Start Time				2021-07-20 15:21:10
Cycles / Well
Cycles / Well
A7	1	2	3	4	5	6	7	8	9	10	11	12	13	14	15	16	17	18	19	20	21	22	23	24	25	26	27	28	29	30	31	32	33	34	35	36	37	38	39	40	41	42	43	44	45	46	47	48	49
Time [s]	0	30.015	60.028	90.062	120.092	150.108	180.051	210.073	240.081	270.086	300.092	330.097	360.11	390.118	420.127	450.135	480.143	510.148	540.162	570.175	600.183	630.188	660.195	690.206	720.21	750.235	780.256	810.264	840.283	870.293	900.298	930.305	960.322	990.345	1020.35	1050.36	1080.37	1110.39	1140.39	1170.41	1200.42	1230.43	1260.44	1290.44	1320.46	1350.46	1380.49	1410.49	1440.5
Temp. [°C]	27	27.3	27.3	27.2	27.1	26.9	27.2	27.2	27.3	27.6	27.6	27.5	27.5	27.4	27.5	27.5	27.3	27.2	27.2	27.3	27.4	27.5	27.8	27.8	27.5	27.3	27.3	27	27.1	27.2	27.4	27.5	27.7	27.7	27.7	27.5	27.4	27.4	27.3	27.2	27.3	27.4	27.8	27.8	27.7	27.5	27.4	27.2	27.1
Mean	4680.5	4366	4090.5	4092	4828.5	4910.75	5076.25	5244.25	5049.25	4965.75	5288.75	5078	5109.5	5229.75	4919.75	5272.25	5739	5776.75	4941.25	5681.25	5558	5448.25	5447.75	5339.75	5537.25	5557.25	5548.5	5789.25	5287.25	5173.75	5616.5	5172.5	6061.75	5664.25	5878	5781.25	6139.5	5261.5	5841.5	6323.5	5831	5986.5	6234	5519.5	6117.5	5769.25	5945	5842.5	6321.75
Cycles / Well
B7	1	2	3	4	5	6	7	8	9	10	11	12	13	14	15	16	17	18	19	20	21	22	23	24	25	26	27	28	29	30	31	32	33	34	35	36	37	38	39	40	41	42	43	44	45	46	47	48	49
Time [s]	0	30.015	60.028	90.062	120.092	150.108	180.051	210.073	240.081	270.086	300.092	330.097	360.11	390.118	420.127	450.135	480.143	510.148	540.162	570.175	600.183	630.188	660.195	690.206	720.21	750.235	780.256	810.264	840.283	870.293	900.298	930.305	960.322	990.345	1020.35	1050.36	1080.37	1110.39	1140.39	1170.41	1200.42	1230.43	1260.44	1290.44	1320.46	1350.46	1380.49	1410.49	1440.5
Temp. [°C]	27	27.3	27.3	27.2	27.1	26.9	27.2	27.2	27.3	27.6	27.6	27.5	27.5	27.4	27.5	27.5	27.3	27.2	27.2	27.3	27.4	27.5	27.8	27.8	27.5	27.3	27.3	27	27.1	27.2	27.4	27.5	27.7	27.7	27.7	27.5	27.4	27.4	27.3	27.2	27.3	27.4	27.8	27.8	27.7	27.5	27.4	27.2	27.1
Mean	4652	4384	4911.75	5170.5	4640.5	5655.75	5374	5147.5	5102	5178	5335	5438	5273	5623.25	5211.75	5599.25	5641.75	5380.5	5654.5	5386	5509.75	5299	5526.5	5617	5746	5551	5380.75	5265.75	5775.75	5626	5830.75	6146.25	5560.75	5934.75	5792.5	5528.75	5971.25	5966.5	5943.75	5959.25	5704	6189.5	6283.25	6385.75	5852.5	6126.75	6236.5	6158.25	6413.75
Cycles / Well
C1	1	2	3	4	5	6	7	8	9	10	11	12	13	14	15	16	17	18	19	20	21	22	23	24	25	26	27	28	29	30	31	32	33	34	35	36	37	38	39	40	41	42	43	44	45	46	47	48	49
Time [s]	0	30.015	60.028	90.062	120.092	150.108	180.051	210.073	240.081	270.086	300.092	330.097	360.11	390.118	420.127	450.135	480.143	510.148	540.162	570.175	600.183	630.188	660.195	690.206	720.21	750.235	780.256	810.264	840.283	870.293	900.298	930.305	960.322	990.345	1020.35	1050.36	1080.37	1110.39	1140.39	1170.41	1200.42	1230.43	1260.44	1290.44	1320.46	1350.46	1380.49	1410.49	1440.5
Temp. [°C]	27	27.2	27.3	27.3	27.2	27	27.2	27.3	27.3	27.6	27.6	27.6	27.5	27.4	27.5	27.5	27.3	27.2	27.2	27.3	27.4	27.5	27.7	27.8	27.6	27.4	27.3	27.1	27.1	27.2	27.3	27.4	27.7	27.7	27.7	27.6	27.4	27.4	27.3	27.2	27.3	27.4	27.7	27.8	27.8	27.6	27.4	27.3	27.1
Mean	7391.5	7689	8269.25	7506.25	8496.25	7919	10149.8	9230.75	9781.75	10683.2	10159.5	9370.25	11034.2	9872.5	10721	11861.8	11427.8	10773.2	10135.2	11184.8	11826.5	11182.5	11826.5	12676	11381.8	12173.8	11939	13055.5	12212	13647.2	13491.5	13441	13229	12553.5	13653.8	13628.2	14384.2	14787	13903	13883	15113.5	14578.2	15330.8	13944.8	15749.2	14000.2	14013.5	15071.5	15682.2
Cycles / Well
C7	1	2	3	4	5	6	7	8	9	10	11	12	13	14	15	16	17	18	19	20	21	22	23	24	25	26	27	28	29	30	31	32	33	34	35	36	37	38	39	40	41	42	43	44	45	46	47	48	49
Time [s]	0	30.015	60.028	90.062	120.092	150.108	180.051	210.073	240.081	270.086	300.092	330.097	360.11	390.118	420.127	450.135	480.143	510.148	540.162	570.175	600.183	630.188	660.195	690.206	720.21	750.235	780.256	810.264	840.283	870.293	900.298	930.305	960.322	990.345	1020.35	1050.36	1080.37	1110.39	1140.39	1170.41	1200.42	1230.43	1260.44	1290.44	1320.46	1350.46	1380.49	1410.49	1440.5
Temp. [°C]	27	27.3	27.3	27.2	27.1	26.9	27.2	27.2	27.3	27.6	27.6	27.5	27.5	27.4	27.5	27.5	27.3	27.2	27.2	27.3	27.4	27.5	27.8	27.8	27.5	27.3	27.3	27	27.1	27.2	27.4	27.5	27.7	27.7	27.7	27.5	27.4	27.4	27.3	27.2	27.3	27.4	27.8	27.8	27.7	27.5	27.4	27.2	27.1
Mean	4779	4197	4986.25	3700.75	4804.75	5082.25	5142.75	5383	5189.5	5355.25	5257	5496.5	5551.25	5158	4876.75	5255.25	5387.5	5558.25	5738.25	5409.5	5474.75	6120.75	5287.25	5066.5	5483	5677.5	5433	5882.75	5662	5585	5588	6141.25	5649.5	5693.25	5536.75	5456.5	5395.25	5864.75	5527.75	5973	5788.75	5831.5	5284	5900.75	6083.5	5808.25	6138	6145.75	5811.75
Cycles / Well
C9	1	2	3	4	5	6	7	8	9	10	11	12	13	14	15	16	17	18	19	20	21	22	23	24	25	26	27	28	29	30	31	32	33	34	35	36	37	38	39	40	41	42	43	44	45	46	47	48	49
Time [s]	0	30.015	60.028	90.062	120.092	150.108	180.051	210.073	240.081	270.086	300.092	330.097	360.11	390.118	420.127	450.135	480.143	510.148	540.162	570.175	600.183	630.188	660.195	690.206	720.21	750.235	780.256	810.264	840.283	870.293	900.298	930.305	960.322	990.345	1020.35	1050.36	1080.37	1110.39	1140.39	1170.41	1200.42	1230.43	1260.44	1290.44	1320.46	1350.46	1380.49	1410.49	1440.5
Temp. [°C]	27	27.3	27.3	27.2	27.1	26.9	27.2	27.2	27.3	27.6	27.6	27.5	27.5	27.4	27.5	27.5	27.3	27.2	27.2	27.3	27.4	27.5	27.8	27.8	27.5	27.3	27.3	27	27.1	27.2	27.4	27.5	27.7	27.7	27.7	27.5	27.4	27.4	27.3	27.2	27.3	27.4	27.8	27.8	27.7	27.5	27.4	27.2	27.1
Mean	3685	3674	3650	3668	3657	3655	6979.5	6693	6456.75	7120.25	7017.25	6850.75	6746.25	6638.25	6314.5	6604.25	6871	7479.25	7015.5	6748.5	7294.75	7070.75	7143.75	7397.75	7621	7440.75	6891.25	6898	6993.25	6788.5	7192.25	7327.5	7234.75	7626.5	7324.5	7532.75	7246.75	7762	7580.25	7741.25	7363.25	8104	7882.75	7537.5	7966.75	7215.5	8127	7522	8044.25
Cycles / Well
D1	1	2	3	4	5	6	7	8	9	10	11	12	13	14	15	16	17	18	19	20	21	22	23	24	25	26	27	28	29	30	31	32	33	34	35	36	37	38	39	40	41	42	43	44	45	46	47	48	49
Time [s]	0	30.015	60.028	90.062	120.092	150.108	180.051	210.073	240.081	270.086	300.092	330.097	360.11	390.118	420.127	450.135	480.143	510.148	540.162	570.175	600.183	630.188	660.195	690.206	720.21	750.235	780.256	810.264	840.283	870.293	900.298	930.305	960.322	990.345	1020.35	1050.36	1080.37	1110.39	1140.39	1170.41	1200.42	1230.43	1260.44	1290.44	1320.46	1350.46	1380.49	1410.49	1440.5
Temp. [°C]	27	27.3	27.3	27.2	27.1	26.9	27.2	27.2	27.3	27.6	27.6	27.5	27.5	27.4	27.5	27.5	27.3	27.2	27.2	27.3	27.4	27.5	27.8	27.8	27.5	27.3	27.3	27	27.1	27.2	27.4	27.5	27.7	27.7	27.7	27.5	27.4	27.4	27.3	27.2	27.3	27.4	27.8	27.8	27.7	27.5	27.4	27.2	27.1
Mean	5037	4711.75	4978.75	4978.25	4748.75	5060.5	4928	4634.5	4838.5	4916.5	5160	4546	4943	4863.25	4906.75	4839.25	4950	4835.5	4893.75	5254.5	4783.75	4710.5	5377.75	5347.25	4928.5	4924.25	4738	4791	4933.25	5023.75	5146.5	5076.75	5125.75	4764.5	4872.25	4939.75	4925.5	4853.25	4836	5250.75	4927.25	5212.75	4976	4941.25	5406	5102.5	5145	4896	4917.75
[truncated: 17 more columns]

## Sheet: run 210721 run1
Method name: Actin polymerization (Modified)
Application: SparkControl				V3.1
Device: Spark				Serial number: 2007011179
Firmware:				LUM:V5.2.4|ABS:V4.3.2|ABS_MEX:V5.1.1|MTP:V14.2.11|FLUOR:V5.1.4|FLUOR_BOTTOM:V5.0.2|PODI:V1.11.2
Date:				2021-07-21
Time:				10:17 AM
System				CBUMAINZ-HP
User				CBUMainz-HP\User
Plate				[GRE384sb] - Greiner 384 Flat Black Cat. No.: 784 076
Lid lifter				No lid
Humidity Cassette				No humidity cassette
Smooth mode				Not selected
List of actions in this measurement script:
Plate
	Shaking
	Temperature
	Kinetic
		Fluorescence Top Reading				GEF
Name				GRE384sb
Plate layout
Plate area				A1-D19
Start Time				2021-07-21 09:17:55
Shaking (Orbital) Duration [s]				5
Shaking (Orbital) Position				Current
Shaking (Orbital) Amplitude [mm]				1
Shaking (Orbital) Frequency [rpm]				510
End Time				2021-07-21 09:18:00
Start Time				2021-07-21 09:18:00
Temperature control				On
Target temperature [°C]				25
End Time				2021-07-21 09:18:00
Mode	Kinetic
Kinetic cycles				60
Interval time [hhmmss]				00:00:30
Mode	Fluorescence Top Reading
Name	GEF
Excitation				Filter
Excitation wavelength [nm]				485
Excitation bandwidth [nm]				20
Emission				Filter
Emission wavelength [nm]				535
Emission bandwidth [nm]				25
Gain Manual				40
Mirror				Automatic (Dichroic 510)
Number of flashes				3
Integration time [µs]				40
Lag time [µs]				0
Settle time [ms]				0
Z-Position [μm]				17500
Z-Position mode				Manual
Part of Plate				A1-D19
Start Time				2021-07-21 09:18:02
Cycles / Well
D1	1	2	3	4	5	6	7	8	9	10	11	12	13	14	15	16	17	18	19	20	21	22	23	24	25	26	27	28	29	30	31	32	33	34	35	36	37	38	39	40	41	42	43	44	45	46	47	48	49
Time [s]	0	30.015	60.028	90.062	120.092	150.108	180.051	210.073	240.081	270.086	300.092	330.097	360.11	390.118	420.127	450.135	480.143	510.148	540.162	570.175	600.183	630.188	660.195	690.206	720.21	750.235	780.256	810.264	840.283	870.293	900.298	930.305	960.322	990.345	1020.35	1050.36	1080.37	1110.39	1140.39	1170.41	1200.42	1230.43	1260.44	1290.44	1320.46	1350.46	1380.49	1410.49	1440.5
Temp. [°C]	26.8	26.9	26.9	26.9	27	27	27.2	27.3	27.3	27.3	27.1	27	26.9	26.8	26.7	26.9	27	27	27	26.9	26.8	26.8	26.8	26.9	27	26.8	26.8	26.6	26.6	26.7	26.8	26.9	27.1	27	26.9	26.7	26.5	26.3	26.4	26.4	26.6	26.8	27	27	26.9	26.6	26.5	26.4	26.5
Mean	3832	3791	3875	3904	3921	3999	4008	4047	4132	4160	4171	4180	4301	4328	4377	4468	4397	4482	4600	4545	4599	4674	4734	4759	4865	4881	4900	5012	5038	5109	5235	5183	5262	5312	5347	5344	5439	5503	5516	5607	5599	5651	5733	5752	5900	5850	5897	5938	6075
Cycles / Well
D3	1	2	3	4	5	6	7	8	9	10	11	12	13	14	15	16	17	18	19	20	21	22	23	24	25	26	27	28	29	30	31	32	33	34	35	36	37	38	39	40	41	42	43	44	45	46	47	48	49
Time [s]	0	30.015	60.028	90.062	120.092	150.108	180.051	210.073	240.081	270.086	300.092	330.097	360.11	390.118	420.127	450.135	480.143	510.148	540.162	570.175	600.183	630.188	660.195	690.206	720.21	750.235	780.256	810.264	840.283	870.293	900.298	930.305	960.322	990.345	1020.35	1050.36	1080.37	1110.39	1140.39	1170.41	1200.42	1230.43	1260.44	1290.44	1320.46	1350.46	1380.49	1410.49	1440.5
Temp. [°C]	26.8	26.9	26.9	26.9	27	27	27.2	27.3	27.3	27.3	27.1	27	26.9	26.8	26.7	26.9	27	27	27	26.9	26.8	26.8	26.8	26.9	27	26.8	26.8	26.6	26.6	26.7	26.8	26.9	27.1	27	26.9	26.7	26.5	26.3	26.4	26.4	26.6	26.8	27	27	26.9	26.6	26.5	26.4	26.5
Mean	2401	2406	2397	2412	2442	2439	3249	3264	3282	3300	3352	3394	3395	3486	3482	3532	3595	3574	3612	3729	3743	3801	3841	3858	3885	3948	4023	4022	4067	4118	4240	4217	4258	4307	4356	4411	4495	4510	4569	4545	4594	4716	4733	4785	4815	4853	4915	4886	5028
[truncated: 17 more columns]

## Sheet: run 210721 run2
Method name: Actin polymerization (Modified)
Application: SparkControl				V3.1
Device: Spark				Serial number: 2007011179
Firmware:				LUM:V5.2.4|ABS:V4.3.2|ABS_MEX:V5.1.1|MTP:V14.2.11|FLUOR:V5.1.4|FLUOR_BOTTOM:V5.0.2|PODI:V1.11.2
Date:				2021-07-21
Time:				12:14 PM
System				CBUMAINZ-HP
User				CBUMainz-HP\User
Plate				[GRE384sb] - Greiner 384 Flat Black Cat. No.: 784 076
Lid lifter				No lid
Humidity Cassette				No humidity cassette
Smooth mode				Not selected
List of actions in this measurement script:
Plate
	Shaking
	Temperature
	Kinetic
		Fluorescence Top Reading				GEF
Name				GRE384sb
Plate layout
Plate area				E1-H16
Start Time				2021-07-21 11:14:14
Shaking (Orbital) Duration [s]				5
Shaking (Orbital) Position				Current
Shaking (Orbital) Amplitude [mm]				1
Shaking (Orbital) Frequency [rpm]				510
End Time				2021-07-21 11:14:19
Start Time				2021-07-21 11:14:19
Temperature control				On
Target temperature [°C]				25
End Time				2021-07-21 11:14:19
Mode	Kinetic
Kinetic cycles				60
Interval time [hhmmss]				00:00:30
Mode	Fluorescence Top Reading
Name	GEF
Excitation				Filter
Excitation wavelength [nm]				485
Excitation bandwidth [nm]				20
Emission				Filter
Emission wavelength [nm]				535
Emission bandwidth [nm]				25
Gain Manual				40
Mirror				Automatic (Dichroic 510)
Number of flashes				3
Integration time [µs]				40
Lag time [µs]				0
Settle time [ms]				0
Z-Position [μm]				17500
Z-Position mode				Manual
Part of Plate				E1-H16
Start Time				2021-07-21 11:14:22
Cycles / Well
H1	1	2	3	4	5	6	7	8	9	10	11	12	13	14	15	16	17	18	19	20	21	22	23	24	25	26	27	28	29	30	31	32	33	34	35	36	37	38	39	40	41	42	43	44	45	46	47	48	49
Time [s]	0	30.015	60.028	90.062	120.092	150.108	180.051	210.073	240.081	270.086	300.092	330.097	360.11	390.118	420.127	450.135	480.143	510.148	540.162	570.175	600.183	630.188	660.195	690.206	720.21	750.235	780.256	810.264	840.283	870.293	900.298	930.305	960.322	990.345	1020.35	1050.36	1080.37	1110.39	1140.39	1170.41	1200.42	1230.43	1260.44	1290.44	1320.46	1350.46	1380.49	1410.49	1440.5
Temp. [°C]	27.5	27.7	27.8	27.7	27.6	27.5	27.4	27.4	27.6	27.7	27.9	28	28	27.9	27.6	27.5	27.3	27.2	27.4	27.5	27.7	28	27.9	27.9	27.7	27.5	27.4	27.3	27.3	27.5	27.6	27.8	27.9	27.8	27.7	27.5	27.6	27.4	27.4	27.4	27.7	27.9	27.9	27.8	27.7	27.6	27.5	27.3	27.3
Mean	5316	5389	5459	5615	5539	5715	5837	5937	5990	6094	6065	6222	6284	6481	6586	6566	6683	6781	6849	6831	6997	7081	7215	7211	7354	7302	7393	7378	7623	7624	7578	7804	7844	7891	8017	8120	8261	8389	8286	8410	8581	8530	8592	8626	8763	8953	9023	9071	9128
Cycles / Well
H3	1	2	3	4	5	6	7	8	9	10	11	12	13	14	15	16	17	18	19	20	21	22	23	24	25	26	27	28	29	30	31	32	33	34	35	36	37	38	39	40	41	42	43	44	45	46	47	48	49
Time [s]	0	30.015	60.028	90.062	120.092	150.108	180.051	210.073	240.081	270.086	300.092	330.097	360.11	390.118	420.127	450.135	480.143	510.148	540.162	570.175	600.183	630.188	660.195	690.206	720.21	750.235	780.256	810.264	840.283	870.293	900.298	930.305	960.322	990.345	1020.35	1050.36	1080.37	1110.39	1140.39	1170.41	1200.42	1230.43	1260.44	1290.44	1320.46	1350.46	1380.49	1410.49	1440.5
Temp. [°C]	27.5	27.7	27.8	27.7	27.6	27.5	27.4	27.4	27.6	27.7	27.9	28	28	27.9	27.6	27.5	27.3	27.2	27.4	27.5	27.7	28	27.9	27.9	27.7	27.5	27.4	27.3	27.3	27.5	27.6	27.8	27.9	27.8	27.7	27.5	27.6	27.4	27.4	27.4	27.7	27.9	27.9	27.8	27.7	27.6	27.5	27.3	27.3
Mean	4049	4086	4172	4192	4353	4300	4404	4466	4434	4527	4605	4664	4642	4708	4822	4950	4986	4998	5015	5086	5224	5223	5283	5364	5464	5427	5552	5623	5694	5705	5842	6005	5983	6070	6082	6222	6263	6376	6375	6397	6513	6579	6614	6637	6702	6836	6864	6854	6955
Cycles / Well
H5	1	2	3	4	5	6	7	8	9	10	11	12	13	14	15	16	17	18	19	20	21	22	23	24	25	26	27	28	29	30	31	32	33	34	35	36	37	38	39	40	41	42	43	44	45	46	47	48	49
Time [s]	0	30.015	60.028	90.062	120.092	150.108	180.051	210.073	240.081	270.086	300.092	330.097	360.11	390.118	420.127	450.135	480.143	510.148	540.162	570.175	600.183	630.188	660.195	690.206	720.21	750.235	780.256	810.264	840.283	870.293	900.298	930.305	960.322	990.345	1020.35	1050.36	1080.37	1110.39	1140.39	1170.41	1200.42	1230.43	1260.44	1290.44	1320.46	1350.46	1380.49	1410.49	1440.5
Temp. [°C]	27.5	27.7	27.8	27.7	27.6	27.5	27.4	27.4	27.6	27.7	27.9	28	28	27.9	27.6	27.5	27.3	27.2	27.4	27.5	27.7	28	27.9	27.9	27.7	27.5	27.4	27.3	27.3	27.5	27.6	27.8	27.9	27.8	27.7	27.5	27.6	27.4	27.4	27.4	27.7	27.9	27.9	27.8	27.7	27.6	27.5	27.3	27.3
Mean	2651	2681	2727	2683	2701	2749	4819	5029	5179	5236	5829	5413	5498	5610	5581	5753	5788	5847	6023	6103	6285	6233	6423	6533	6612	6673	6794	7016	6941	7051	7427	7267	7457	7479	7634	7754	7622	7699	7891	8030	8118	8110	8197	8239	8279	8531	8539	8652	8721
[truncated: 17 more columns]
