# Supplementary material for: ERK3/MAPK6 dictates CDC42/RAC1 activity and ARP2/3-dependent actin polymerization
Source: eLife journal article supplement (doi:10.7554/elife.85167), 2023-04-14
Supplement: fig3-figsupp1-data1 [file Figure 3-figure supplement 1-source data.xlsx]

## Sheet: Result sheet
Method name: Actin polymerization (Modified)
Application: SparkControl				V3.1
Device: Spark				Serial number: 2007011179
Firmware:				LUM:V5.2.4|ABS:V4.3.2|ABS_MEX:V5.1.1|MTP:V14.2.11|FLUOR:V5.1.4|FLUOR_BOTTOM:V5.0.2|PODI:V1.11.2
Date:				2021-07-20
Time:				4:00 PM
System				CBUMAINZ-HP
User				CBUMainz-HP\User
Plate				[GRE96fb_half area] - Greiner 96 Flat Black Cat. No.: 675077/675076
Lid lifter				No lid
Humidity Cassette				No humidity cassette
Smooth mode				Not selected
List of actions in this measurement script:
Plate
	Shaking
	Temperature
	Kinetic
		Fluorescence Top Reading				GEF
Name				GRE96fb_half area
Plate layout
Plate area				A1-D12
Start Time				2021-07-20 15:30:31
Shaking (Orbital) Duration [s]				5
Shaking (Orbital) Position				Current
Shaking (Orbital) Amplitude [mm]				1
Shaking (Orbital) Frequency [rpm]				510
End Time				2021-07-20 15:30:36
Start Time				2021-07-20 15:30:36
Temperature control				On
Target temperature [°C]				25
End Time				2021-07-20 15:30:36
Mode	Kinetic
Kinetic cycles				60
Interval time [hhmmss]				00:00:30
Mode	Fluorescence Top Reading
Name	GEF
Excitation				Filter
Excitation wavelength [nm]				485
Excitation bandwidth [nm]				20
Emission				Filter
Emission wavelength [nm]				535
Emission bandwidth [nm]				25
Gain Manual				40
Mirror				Automatic (Dichroic 510)
Number of flashes				3
Integration time [µs]				40
Lag time [µs]				0
Settle time [ms]				0
Z-Position [μm]				17500
Z-Position mode				Manual
Multiple Reads per Well (Circle (filled))				2 x 2
Multiple Reads per Well (Border) [μm]				500
Part of Plate				A1-D12
Start Time				2021-07-20 15:30:38
GEF
1;1	1;2
2;1	2;2
Cycles / Well
A1	1	2	3	4	5	6	7	8	9	10	11	12	13	14	15	16	17	18	19	20	21	22	23	24	25	26	27	28	29	30	31	32	33	34	35	36	37	38	39	40	41	42	43	44	45	46	47	48	49
Time [s]	0	30.015	60.029	90.044	120.058	150.07	180.085	210.095	240.111	270.124	300.138	330.153	360.18	390.196	420.226	450.256	480.284	510.297	540.321	570.34	600.376	630.385	660.397	690.411	720.424	750.448	780.47	810.494	840.508	870.522	900.554	930.579	960.608	990.618	1020.63	1050.64	1080.66	1110.67	1140.7	1170.72	1200.75	1230.76	1260.79	1290.8	1320.82	1350.83	1380.86	1410.87	1440.89
Temp. [°C]	27.2	27.2	27.3	27.4	27.5	27.6	27.6	27.3	27.4	27.5	27.3	27.2	27.2	27.2	27.3	27.5	27.6	27.8	27.7	27.4	27.2	27.1	27	27.1	27.3	27.4	27.6	27.7	27.7	27.6	27.4	27.4	27.3	27.2	27.2	27.3	27.5	27.7	27.8	27.6	27.5	27.3	27.1	27	27.2	27.3	27.6	27.8	27.8
Mean	9663	9025.75	9063.75	9185.75	9627	9560.75	9998	9778.75	10422	10016.8	10838.8	10444.8	10078.5	10249.8	11066.8	11208.5	10975.8	10742.5	10748.2	11494	11744.2	11075.2	11487	11311.8	12293	11495.8	11692.8	11810.8	12109	12318.2	12855.2	12303.8	13139	12856.8	12785	13421.2	12960.8	13374.2	13093.2	13455.8	14109	13942.8	14319	13766.8	14369	14675.8	13954.5	14937.5	14918.8
StDev	930.337	974.947	1024.41	920.992	700.591	1166.88	651.721	1188.57	381.582	976.396	234.496	805.334	1085.86	1028.1	204.821	188.052	592.419	1112.17	1105.18	505.687	140.536	1225.58	890.783	1138.45	305.235	1226.91	1161.21	911.535	678.616	619.845	250.46	1312.19	503.686	1355.82	1579.05	204.094	967.982	921.484	1283.3	1388.8	283.103	1125.71	447.483	1218.26	286.36	415.25	1145.45	316.196	409.857
1;1	9934	9549	9687	9760	9896	10022	10032	9966	10254	10356	10735	10695	10700	10694	10996	11111	11218	11351	11444	11636	11845	11783	12266	12106	12116	12320	12491	12241	12561	12761	12525	13099	13258	13309	13447	13453	13647	13650	13718	14153	13921	14324	14258	14481	14346	14479	14917	14813	14948
1;2	10358	10117	10174	10164	10495	10832	10877	10915	10939	11107	11111	11053	11166	11184	11370	11425	11683	11645	11619	11841	11839	12176	12250	12247	12543	12568	12660	12803	12807	12915	12930	13626	13461	13976	14111	13674	13740	14058	14284	14479	14285	14676	14750	14731	14777	14915	14923	15225	15227
2;1	10067	8014	8308	8572	9071	8080	9337	8108	10047	8785	10936	9259	8720	8802	10920	11295	10648	9155	9192	10746	11544	9410	10680	9781	12559	9881	10134	10705	11414	11625	13126	10724	12396	10883	10505	13180	11654	12016	11324	11418	13820	12268	13720	12032	14127	15113	12667	15163	15169
2;2	8293	8423	8086	8247	9046	9309	9746	10126	10448	9819	10573	10772	9728	10319	10981	11003	10354	10819	10738	11753	11749	10932	10752	11113	11954	11214	11486	11494	11654	11972	12840	11766	13441	13259	13077	13378	12802	13773	13047	13773	14410	14503	14548	13823	14226	14196	13311	14549	14331
Cycles / Well
A2	1	2	3	4	5	6	7	8	9	10	11	12	13	14	15	16	17	18	19	20	21	22	23	24	25	26	27	28	29	30	31	32	33	34	35	36	37	38	39	40	41	42	43	44	45	46	47	48	49
Time [s]	0	30.015	60.029	90.044	120.058	150.07	180.085	210.095	240.111	270.124	300.138	330.153	360.18	390.196	420.226	450.256	480.284	510.297	540.321	570.34	600.376	630.385	660.397	690.411	720.424	750.448	780.47	810.494	840.508	870.522	900.554	930.579	960.608	990.618	1020.63	1050.64	1080.66	1110.67	1140.7	1170.72	1200.75	1230.76	1260.79	1290.8	1320.82	1350.83	1380.86	1410.87	1440.89
Temp. [°C]	27.2	27.2	27.3	27.4	27.5	27.6	27.6	27.3	27.4	27.5	27.3	27.2	27.2	27.2	27.3	27.5	27.6	27.8	27.7	27.4	27.2	27.1	27	27.1	27.3	27.4	27.6	27.7	27.7	27.6	27.4	27.4	27.3	27.2	27.2	27.3	27.5	27.7	27.8	27.6	27.5	27.3	27.1	27.1	27.2	27.4	27.6	27.8	27.8
Mean	10695.5	11614.8	11945.5	11339.2	11559.2	12050.2	11806.8	12819.8	11846.2	12036.5	12358.2	13024.5	13650.2	12824.8	13047	13521	13210.5	13729.5	14439.8	13865.5	15130	15130.8	14217	15022.5	14478	15128	15278.2	16058	15464.8	15926	16544.8	16045	15964	16527.2	16751.8	16356.2	16593.8	17178.2	16729.2	17934.2	16786	18627.8	16793.5	17519	17774.8	17401.5	18854	18160	18616
StDev	1879.52	1448.12	1064	1693.9	1723.58	1602.3	957.424	1246.51	678.553	1096.92	1538.07	1872.95	1323.54	1625.27	1263.59	1435.85	1704.93	1810.72	1470.96	1183.51	1021.13	1373.48	1715.7	1634.12	1266.97	1413.14	1723.3	1479.25	1234.09	1411.53	1244.48	1712.27	1561.39	1300.57	1626.12	2143.52	1872.77	1359.89	1754.63	1701.8	1233.71	2106.29	1846.06	1892.17	2129.54	1887.74	1754.38	1535.36	1471.88
1;1	11002	11398	10784	11814	11131	12332	11908	12411	11168	11220	11813	12942	12298	11857	12467	12925	12759	13935	13771	12419	14018	14016	13586	14375	13093	14035	14442	14878	14184	14864	15252	15717	15395	14710	14961	15522	15609	16318	15746	17192	15953	19477	15690	17010	17264	16516	17084	16714	17541
1;2	13234	13495	13238	13456	14092	14162	13121	14672	12783	13566	14622	15687	15471	15194	14918	15646	15699	16150	16645	15310	16422	17084	16748	17463	16129	17203	17862	18195	17090	17996	18224	18452	18223	17801	18898	19472	19363	19166	19323	20484	18570	21181	19445	20294	20879	20232	21255	20330	20768
2;1	9353	11597	12309	10565	10730	11240	11026	12202	11645	11262	11184	11511	13446	11681	12157	12487	11839	11923	13658	13974	15361	15065	12934	14007	14606	14702	14344	15851	15630	15590	16552	14400	14640	16830	16406	14592	15320	16947	15574	16994	15966	16552	15396	16059	16063	16388	18800	17869	18335
2;2	9193	9969	11451	9522	10284	10467	11172	11994	11789	12098	11814	11958	13386	12567	12646	13026	12545	12910	13685	13759	14719	14358	13600	14245	14084	14572	14465	15308	14955	15254	16151	15611	15598	16768	16742	15839	16083	16282	16274	17067	16655	17301	16643	16713	16893	16470	18277	17727	17820
Cycles / Well
A3	1	2	3	4	5	6	7	8	9	10	11	12	13	14	15	16	17	18	19	20	21	22	23	24	25	26	27	28	29	30	31	32	33	34	35	36	37	38	39	40	41	42	43	44	45	46	47	48	49
Time [s]	0	30.015	60.029	90.044	120.058	150.07	180.085	210.095	240.111	270.124	300.138	330.153	360.18	390.196	420.226	450.256	480.284	510.297	540.321	570.34	600.376	630.385	660.397	690.411	720.424	750.448	780.47	810.494	840.508	870.522	900.554	930.579	960.608	990.618	1020.63	1050.64	1080.66	1110.67	1140.7	1170.72	1200.75	1230.76	1260.79	1290.8	1320.82	1350.83	1380.86	1410.87	1440.89
Temp. [°C]	27.2	27.2	27.3	27.4	27.5	27.6	27.6	27.3	27.4	27.5	27.3	27.2	27.2	27.2	27.3	27.5	27.6	27.8	27.7	27.4	27.2	27.1	27	27.1	27.3	27.4	27.6	27.7	27.7	27.6	27.4	27.4	27.3	27.2	27.2	27.4	27.5	27.8	27.8	27.6	27.5	27.3	27.1	27.1	27.2	27.4	27.6	27.8	27.8
Mean	10934.8	10997	10455.5	10575	12104	10951.5	11163.5	11887.2	11453.5	11058.2	12353.2	12319.8	11778.5	12961	12284.8	12414	13097.5	13752.5	12932	12599.5	13701.8	12862.5	14296.8	13975.5	13238.2	13752.8	14204.2	15134.5	13882.2	15113	14361	15624.5	14767.2	15557.5	15505.8	16441.5	16469.5	15478.2	15735.8	16284.8	15988.2	16303.2	16619.5	16719.2	17098.5	17138.5	16350.2	17020.5	16896
StDev	1048.73	1265.1	1088.82	1131.07	892.288	1072.74	853.443	757.998	892.05	934.79	773.086	1033.85	1050.17	1179.6	970.561	1245.69	1416.57	1090.03	1098.43	984.576	905.867	921.029	1256.96	1061	944.018	1556.03	1809.39	1020.76	1230.85	1304.48	955.044	909.314	1629	954.083	1442.81	1262.12	1159.45	1287.26	1515.7	990.906	1733.75	1640.64	1901.47	2041.34	1701.07	1827.33	1641.88	1827.24	1547.64
1;1	10421	10658	9981	10837	10834	11052	10765	11275	10868	10819	11851	11558	11267	11897	11634	12226	12413	12840	12533	12134	12867	12590	13489	13498	12436	13629	14166	14174	13024	14123	13348	14991	14639	14293	14073	15411	15521	15092	14925	15147	15499	14767	16179	16272	15326	16769	15253	16555	16299
1;2	12223	12594	12087	11957	12760	12349	12416	12700	12783	12375	13466	13823	13327	14648	13697	14199	15222	15302	14525	14072	14941	14228	16170	15566	14534	15941	16774	16485	15678	17034	15569	16972	16956	16582	17486	18275	18156	17363	17974	17557	18452	18603	19336	19686	19418	19821	18737	19610	19149
2;1	11281	11188	9889	10257	12131	10631	10952	12365	11074	10166	12289	12163	11024	12683	11661	11334	12402	13687	12659	12186	13771	12250	13837	13425	13330	12315	12860	15329	13145	14673	13923	15333	13019	15841	14986	16168	16192	14458	14701	16326	14385	15662	14897	15056	16894	15911	15284	15311	15631
2;2	9814	9548	9865	9249	12691	9774	10521	11209	11089	10873	11807	11735	11496	12616	12147	11897	12353	13181	12011	12006	13228	12382	13691	13413	12653	13126	13017	14550	13682	14622	14604	15202	14455	15514	15478	15912	16009	15000	15343	16109	15617	16181	16066	15863	16756	16053	16127	16606	16505
Cycles / Well
Cdc42	1	2	3	4	5	6	7	8	9	10	11	12	13	14	15	16	17	18	19	20	21	22	23	24	25	26	27	28	29	30	31	32	33	34	35	36	37	38	39	40	41	42	43	44	45	46	47	48	49
Time [s]	0	30.015	60.029	90.044	120.058	150.07	180.085	210.095	240.111	270.124	300.138	330.153	360.18	390.196	420.226	450.256	480.284	510.297	540.321	570.34	600.376	630.385	660.397	690.411	720.424	750.448	780.47	810.494	840.508	870.522	900.554	930.579	960.608	990.618	1020.63	1050.64	1080.66	1110.67	1140.7	1170.72	1200.75	1230.76	1260.79	1290.8	1320.82	1350.83	1380.86	1410.87	1440.89
Temp. [°C]	27.2	27.2	27.3	27.5	27.5	27.6	27.6	27.4	27.4	27.5	27.3	27.2	27.2	27.3	27.3	27.5	27.6	27.8	27.7	27.4	27.2	27.1	27	27.1	27.3	27.4	27.6	27.7	27.7	27.6	27.4	27.4	27.3	27.2	27.2	27.4	27.5	27.8	27.8	27.6	27.5	27.3	27.1	27.1	27.2	27.4	27.6	27.8	27.8
Mean	11364.5	11026.8	12139.5	12541	12160.5	11594.2	11842	11252.2	11415.5	13277.8	13594.8	12304.5	12485.5	13142	13142	12944.2	14483.8	13179	14708.5	13688	15218	14586.8	14759	14827	15947.8	15202	16001.5	16413.5	15397.8	16422.5	15811.5	16136.5	16385	17087.8	16984.8	17505.8	18065	18438.2	16918.2	19000.2	17892.2	19401.8	18589.5	18692.8	18698.5	18483.2	20331.2	18764.8	18411.8
StDev	969.673	1024.24	775.93	920.348	702.578	1632.25	639.99	1212.81	897.52	649.685	1020.22	1527.95	1930.06	565.414	874.044	2007.08	834.756	917.895	898.231	982.514	2101.51	1666.01	894.435	1079.27	966.486	1571.58	1880.59	996.117	1726.97	1575.03	1305.24	1160.62	2032.26	1291.75	760.077	1165.76	1190.95	1472.76	599.275	2610.08	1640.39	1233	1278.95	1339	923.077	1785.68	1602.09	1047.75	1120.4
1;1	11068	10753	11512	11815	11624	12234	11301	11505	11722	12644	12383	12945	13058	12635	13182	13348	13443	13128	13965	13412	13250	14800	14612	14163	15024	14912	15598	15166	15360	14738	15507	15451	16421	15272	16031	17223	16534	16796	16867	16355	17346	17781	17684	17070	18413	19003	18441	17441	17654
1;2	12747	12398	13074	13327	12304	13589	12671	12866	12546	13962	13683	14147	14886	13628	14329	15597	14282	14116	15091	15108	14456	16830	15588	15917	16907	17440	18444	17088	17766	16621	17532	17871	19227	17279	17849	19160	18196	18917	17780	18392	20333	20367	20394	20309	19359	20780	21393	19995	20071
2;1	10481	9935	12482	13346	13097	10018	12020	10282	10775	13697	14869	10822	10422	13635	12275	11089	15417	13528	15799	13389	18175	13699	15272	15556	16647	14686	16078	17333	14790	18481	15830	15691	14654	18320	17220	17220	19441	20225	16556	22599	16839	20357	18602	18954	19503	16910	21898	18919	18088
2;2	11162	11021	11490	11676	11617	10536	11376	10356	10619	12808	13444	11304	11576	12670	12782	11743	14793	11944	13979	12843	14991	13018	13564	13672	15213	13770	13886	16067	13675	15850	14377	15533	15238	17480	16839	16420	18089	17815	16470	18655	17051	19102	17678	18438	17519	17240	19593	18704	17834
Cycles / Well
ERK3 KD 1	1	2	3	4	5	6	7	8	9	10	11	12	13	14	15	16	17	18	19	20	21	22	23	24	25	26	27	28	29	30	31	32	33	34	35	36	37	38	39	40	41	42	43	44	45	46	47	48	49
Time [s]	0	30.015	60.029	90.044	120.058	150.07	180.085	210.095	240.111	270.124	300.138	330.153	360.18	390.196	420.226	450.256	480.284	510.297	540.321	570.34	600.376	630.385	660.397	690.411	720.424	750.448	780.47	810.494	840.508	870.522	900.554	930.579	960.608	990.618	1020.63	1050.64	1080.66	1110.67	1140.7	1170.72	1200.75	1230.76	1260.79	1290.8	1320.82	1350.83	1380.86	1410.87	1440.89
Temp. [°C]	27.2	27.2	27.3	27.5	27.5	27.6	27.6	27.4	27.4	27.5	27.3	27.2	27.2	27.3	27.3	27.5	27.6	27.8	27.7	27.4	27.2	27.1	27	27.1	27.3	27.4	27.6	27.7	27.7	27.6	27.4	27.4	27.3	27.2	27.2	27.4	27.5	27.8	27.8	27.6	27.5	27.3	27.1	27.1	27.2	27.4	27.6	27.8	27.8
Mean	16019.8	16279	16337	15770.8	16526.8	16389	17859.5	16448.8	18116.8	16683	17569.2	18056.2	18045	19728.8	19826.8	18792	18938.5	19601.8	19387.2	21200.8	19571.2	19749.5	20914.2	21476.2	21726	20986.5	21426.5	22876.2	23239.8	23426.5	23019.5	23136	24435.5	23727	24194.5	23568.8	24469.2	24265.8	23306	25416	25169.2	25497.8	26417.2	26175.8	25307.2	26606.5	25932.5	25649.2	26343.5
StDev	1453.94	1873.6	1174.49	1337.22	1243.42	1985.27	887.326	1827.53	1111.64	1647.7	1099.63	1650.09	905.758	1086.82	1270.92	1813.91	995.631	1602.75	1270.52	1151.65	1112.44	2093.45	1357.8	1440.82	1419.6	1970.4	1534.07	1234.3	1192.47	1532.88	1130.17	1223.12	1398.57	1171.53	1455.85	1597.39	1477.34	1339.78	1545.12	902.843	1425.8	1217.59	1323.42	1331.12	1587.96	1849.91	1279.34	1699.88	1479.57
1;1	15326	16326	15329	15180	16206	16652	17012	16880	17931	16473	16629	17680	17305	18524	18060	18336	17953	19732	19116	19921	18908	20233	19973	19420	19778	20683	21151	21278	22102	21535	22655	22670	22745	21971	22060	22930	22311	22772	22689	24360	24207	24891	24893	24340	22993	24089	24208	24214	24397
1;2	18200	18626	17839	17478	18120	19002	19055	18856	19720	19064	18867	20488	19339	20566	21021	21434	20244	21724	21154	22289	21227	22474	22823	22098	22469	23807	23552	24154	24385	23832	24663	24887	26159	24358	25147	25765	24986	25798	25346	26189	27199	27067	27156	27274	25972	27817	27061	28066	26998
2;1	15243	16120	16700	16072	16661	15580	17963	14958	17187	15791	18096	17007	17975	20726	20372	17316	19130	17906	18125	22051	19214	17730	20947	22734	23026	19263	21116	23444	24147	25219	22680	22929	24559	24328	25099	22012	25661	24881	21698	26146	25127	25776	27829	27028	26583	28157	26723	24780	27860
2;2	15310	14044	15480	14353	15120	14322	17408	15101	17629	15404	16685	17050	17561	19099	19854	18082	18427	19045	19154	20542	18936	18561	19914	21653	21631	20193	19887	22629	22325	23120	22080	22058	24279	24251	24472	23568	24919	23612	23491	24969	24144	24257	25791	26061	25681	26363	25738	25537	26119
Cycles / Well
ERK3 KD 2	1	2	3	4	5	6	7	8	9	10	11	12	13	14	15	16	17	18	19	20	21	22	23	24	25	26	27	28	29	30	31	32	33	34	35	36	37	38	39	40	41	42	43	44	45	46	47	48	49
Time [s]	0	30.015	60.029	90.044	120.058	150.07	180.085	210.095	240.111	270.124	300.138	330.153	360.18	390.196	420.226	450.256	480.284	510.297	540.321	570.34	600.376	630.385	660.397	690.411	720.424	750.448	780.47	810.494	840.508	870.522	900.554	930.579	960.608	990.618	1020.63	1050.64	1080.66	1110.67	1140.7	1170.72	1200.75	1230.76	1260.79	1290.8	1320.82	1350.83	1380.86	1410.87	1440.89
Temp. [°C]	27.2	27.2	27.3	27.5	27.5	27.6	27.6	27.4	27.4	27.5	27.3	27.2	27.2	27.3	27.3	27.5	27.6	27.8	27.7	27.4	27.2	27.1	27	27.1	27.3	27.4	27.6	27.7	27.7	27.6	27.4	27.4	27.3	27.2	27.2	27.4	27.5	27.8	27.8	27.6	27.5	27.3	27.1	27.1	27.2	27.4	27.6	27.8	27.8
Mean	14555.8	15367.8	15807.5	14865.5	16371.5	15231	15446.8	17105.8	17639.8	16234	17827.5	18651	18919.2	18029.5	18812.2	18780.2	19296	18330.8	19181.5	19167.8	20797.8	20864.8	20687.2	19649.8	19520	20232.8	20996.2	20916	21717.5	21894	21542	22814	22178.5	23724	22481	22658.8	24039.5	23675	23154.5	25059	24289.5	23767	24635.5	25467.2	23714.5	24965.8	24801.5	25628.5	25356.2
StDev	2091.21	1617.29	1274.71	1526.41	1393.01	2267.15	1807.63	1006.18	1114.92	2137.47	1108.65	884.319	1027.36	1161.08	1074.91	1013.24	1151.79	1842.36	1367.34	1704.37	903.354	1306.11	1314.56	1482.53	1445.65	1795.83	1431.13	1402.43	1083.99	1292.95	1776.48	1265.62	1307.72	1085.97	1090.33	1294.39	1801.65	976.361	2320.2	1437.3	1310.62	2170.03	1250.76	1344.9	1873.08	1056.6	1518.59	1411.87	1417.89
1;1	14876	15288	14546	14748	15928	15977	15514	16417	16226	16724	17131	17581	17796	17040	17864	17810	18744	18230	18342	19174	19838	19276	19984	19111	18569	19624	20817	20746	20928	20014	21681	22277	21695	22324	21038	21842	21620	22304	22443	22919	24274	23691	23182	23848	23443	23677	24526	23598	23826
1;2	17357	17248	17112	17059	18129	18074	17974	18412	18572	18995	19210	19551	19989	19468	20103	20163	20854	20741	21184	21487	21553	22284	22349	21822	21469	22680	22966	22682	23265	22695	23701	24619	24132	24528	23478	24583	24514	24554	26405	25872	26094	26660	26055	26078	26169	26265	27021	26582	27068
2;1	12609	15626	16675	13897	16629	13024	13999	17374	18491	14080	18211	19170	19562	18474	19290	18840	19402	16255	18930	18567	21584	21481	21065	19187	18290	18412	20662	19258	21007	22792	19357	22657	21439	24636	22262	22252	25952	23713	20922	25918	23780	21414	25184	26952	21612	24971	23945	26596	25875
2;2	13381	13309	14897	13758	14800	13849	14300	16220	17270	15137	16758	18302	18330	17136	17992	18308	18184	18097	18270	17443	20216	20418	19351	18479	19752	20215	19540	20978	21670	22075	21429	21703	21448	23408	23146	21958	24072	24129	22848	25527	23010	23303	24121	24991	23634	24950	23714	25738	24656
Cycles / Well
A7	1	2	3	4	5	6	7	8	9	10	11	12	13	14	15	16	17	18	19	20	21	22	23	24	25	26	27	28	29	30	31	32	33	34	35	36	37	38	39	40	41	42	43	44	45	46	47	48	49
Time [s]	0	30.015	60.029	90.044	120.058	150.07	180.085	210.095	240.111	270.124	300.138	330.153	360.18	390.196	420.226	450.256	480.284	510.297	540.321	570.34	600.376	630.385	660.397	690.411	720.424	750.448	780.47	810.494	840.508	870.522	900.554	930.579	960.608	990.618	1020.63	1050.64	1080.66	1110.67	1140.7	1170.72	1200.75	1230.76	1260.79	1290.8	1320.82	1350.83	1380.86	1410.87	1440.89
Temp. [°C]	27.2	27.2	27.3	27.5	27.5	27.6	27.6	27.4	27.4	27.5	27.3	27.2	27.2	27.3	27.3	27.5	27.6	27.8	27.7	27.4	27.2	27.1	27	27.1	27.3	27.4	27.6	27.7	27.7	27.6	27.4	27.4	27.3	27.2	27.2	27.4	27.5	27.8	27.8	27.6	27.5	27.3	27.1	27.1	27.2	27.4	27.6	27.8	27.8
Mean	5076.25	5244.25	5049.25	4965.75	5288.75	5078	5109.5	5229.75	4919.75	5272.25	5739	5776.75	4941.25	5681.25	5558	5448.25	5447.75	5339.75	5537.25	5557.25	5548.5	5789.25	5287.25	5173.75	5616.5	5172.5	6061.75	5664.25	5878	5781.25	6139.5	5261.5	5841.5	6323.5	5831	5986.5	6234	5519.5	6117.5	5769.25	5945	5842.5	6321.75	5747	6207.75	6380.75	6361.5	6077	6185.5
StDev	749.495	524.39	387.193	456.628	501.55	487.733	498.336	257.87	560.17	266.116	398.589	423.116	565.528	279.009	371.018	308.516	438.199	274.631	377.93	389.408	409.983	458.57	662.467	580.263	364.409	648.087	409.66	408.323	494.15	448.786	363.36	396.386	459.385	618.163	548.123	414.945	761.895	476.112	314.785	263.527	344.088	359.023	479.281	439.616	288.376	514.227	479.164	281.659	354.969
1;1	5043	5089	4769	4964	5177	5107	5181	5109	5054	5068	5306	5257	5130	5402	5488	5329	5471	5213	5399	5561	5282	5512	5585	5315	5395	5292	5635	5363	5392	5534	5806	5197	5862	5811	5420	5904	5405	5526	5687	5417	5909	5817	5787	5517	5799	5739	5857	5954	6165
1;2	6000	5909	5408	5535	5615	5754	5760	5615	5630	5662	5770	5764	5658	5748	5929	5879	5842	5749	5929	6044	5715	5940	6073	5934	6020	6024	6204	5874	5868	6022	6176	5826	6461	6220	6106	6492	6136	6115	6216	5900	6408	6348	6278	6114	6401	6451	6384	6446	6690
2;1	4165	5328	5356	4417	5735	4786	4916	5125	4321	5208	6262	6293	4497	6041	5743	5156	5647	5236	5745	5533	6046	6364	4854	4669	5817	4530	6565	6135	6558	6277	6634	5120	5670	7216	6468	6062	7252	5487	6437	6026	5887	5690	6953	6116	6420	6993	7001	6122	5889
2;2	5097	4651	4664	4947	4628	4665	4581	5070	4674	5151	5618	5793	4480	5534	5072	5429	4831	5161	5076	5091	5151	5341	4637	4777	5234	4844	5843	5285	5694	5292	5942	4903	5373	6047	5330	5488	6143	4950	6130	5734	5576	5515	6269	5241	6211	6340	6204	5786	5998
Cycles / Well
A8	1	2	3	4	5	6	7	8	9	10	11	12	13	14	15	16	17	18	19	20	21	22	23	24	25	26	27	28	29	30	31	32	33	34	35	36	37	38	39	40	41	42	43	44	45	46	47	48	49
Time [s]	0	30.015	60.029	90.044	120.058	150.07	180.085	210.095	240.111	270.124	300.138	330.153	360.18	390.196	420.226	450.256	480.284	510.297	540.321	570.34	600.376	630.385	660.397	690.411	720.424	750.448	780.47	810.494	840.508	870.522	900.554	930.579	960.608	990.618	1020.63	1050.64	1080.66	1110.67	1140.7	1170.72	1200.75	1230.76	1260.79	1290.8	1320.82	1350.83	1380.86	1410.87	1440.89
Temp. [°C]	27.2	27.2	27.3	27.5	27.5	27.6	27.6	27.4	27.4	27.5	27.3	27.2	27.2	27.3	27.3	27.5	27.6	27.8	27.7	27.4	27.2	27.1	27	27.1	27.3	27.4	27.6	27.7	27.7	27.6	27.4	27.4	27.3	27.2	27.2	27.4	27.6	27.8	27.8	27.6	27.4	27.3	27.1	27.1	27.2	27.4	27.7	27.8	27.8
Mean	6456.25	6739.5	7146	6850.25	6780.75	7054.75	7097.25	7274.5	7043	7299.5	7193.25	7111.75	7125.5	7278.75	6832.25	7452.75	7468.25	7166.5	7791.5	7646.5	7583.75	7667.25	7416.75	7482.5	7952.25	7179	7360.25	7420.75	7822.5	7928.5	7798.75	7989.25	7854	7827.75	8271.5	8103	8036.75	7899.75	7765.25	8178.75	8402.25	8316.75	8356.25	7742.25	7921.75	8351.25	8660.5	8361.5	8418.25
StDev	1125.14	837.127	599.555	737.321	528.298	674.876	667.241	462.472	524.203	548.687	510.599	575.474	716.66	535.84	688.998	393.236	560.007	814.684	480.755	411.234	567.038	522.208	554.101	557.837	576.574	944.364	632.491	600.57	486.063	476.671	446.158	424.396	716.25	444.858	396.795	512.064	584.07	792.596	791.044	502.032	574.528	632.325	443.209	739.505	622.248	455.533	578.629	561.425	424.808
1;1	6500	6596	6738	6688	6339	6957	6957	6852	6557	6979	7017	7003	6997	6807	6806	7032	7246	7298	7259	7265	7585	7042	6903	6722	7370	7133	7223	7055	7648	7345	7586	7550	7687	7487	7858	7846	7915	7722	7749	7508	7985	7968	7753	7334	7844	8148	7967	7812	7974
1;2	8009	7960	7594	7722	7401	7920	8018	7803	7668	7981	7805	7913	8130	7907	7808	7967	8234	8264	8303	8183	8362	7970	8139	7854	8516	8477	8249	8224	8506	8432	8455	8545	8853	8426	8812	8857	8878	8967	8868	8589	9173	9215	8683	8729	8801	8959	9105	9125	8987
2;1	5423	6123	7722	7040	7039	7067	6993	7520	7280	7487	7351	6989	6944	7541	6256	7501	7477	6468	8074	7745	7028	8205	7551	7943	8374	6233	6751	6880	7770	8174	7684	8057	7149	7491	8232	7735	7532	7056	7034	8537	8508	8287	8695	7045	7346	8404	9169	8117	8276
2;2	5893	6279	6530	5951	6344	6275	6421	6923	6667	6751	6600	6542	6431	6860	6459	7311	6916	6636	7530	7393	7360	7452	7074	7411	7549	6873	7218	7524	7366	7763	7470	7805	7727	7907	8184	7974	7822	7854	7410	8081	7943	7797	8294	7861	7696	7894	8401	8392	8436
Cycles / Well
A9	1	2	3	4	5	6	7	8	9	10	11	12	13	14	15	16	17	18	19	20	21	22	23	24	25	26	27	28	29	30	31	32	33	34	35	36	37	38	39	40	41	42	43	44	45	46	47	48	49
Time [s]	0	30.015	60.029	90.044	120.058	150.07	180.085	210.095	240.111	270.124	300.138	330.153	360.18	390.196	420.226	450.256	480.284	510.297	540.321	570.34	600.376	630.385	660.397	690.411	720.424	750.448	780.47	810.494	840.508	870.522	900.554	930.579	960.608	990.618	1020.63	1050.64	1080.66	1110.67	1140.7	1170.72	1200.75	1230.76	1260.79	1290.8	1320.82	1350.83	1380.86	1410.87	1440.89
Temp. [°C]	27.2	27.2	27.3	27.5	27.5	27.6	27.6	27.4	27.4	27.5	27.3	27.2	27.2	27.3	27.4	27.5	27.7	27.8	27.6	27.4	27.2	27.1	27	27.1	27.3	27.4	27.6	27.7	27.7	27.6	27.4	27.4	27.2	27.2	27.2	27.4	27.6	27.8	27.8	27.6	27.4	27.3	27.1	27.1	27.2	27.4	27.7	27.8	27.8
Mean	7237.25	7187.25	7683.5	7011.75	6878.25	7201	7614	7532.5	7567.25	7929.5	7045.5	7362.5	7587.75	7971.75	8023	7627	7773.75	7705	7701.25	7955	7927.5	8119.5	7933.25	8374.25	7933.5	7983	8061	8182.5	8594.75	8346	8614	8593	8260.25	8742	8286.75	8563.5	8797	8208.25	9029.5	8910	8086	8750.5	8800.75	8850.75	8470	8177.5	8705.25	8531.25	8439
StDev	807.834	930.926	612.379	862.158	765.936	674.19	641.832	453.247	564.612	452.949	627.462	807.529	544.741	507.753	586.079	552.777	643.799	786.989	545.878	532.116	565.499	389.548	712.405	504.973	545.86	538.487	571.293	485.153	441.976	515.521	422.542	398.827	619.863	383.706	418.323	416.005	436.549	646.908	526.843	407.752	567.09	583.501	478.359	510.845	950.005	698.356	455.704	697.254	690.107
1;1	7069	7187	7330	7250	6868	7306	7582	7010	6769	7608	6874	7456	7372	7341	7534	7282	7648	7764	7425	7276	7710	7777	7948	8076	7527	7696	7503	7473	8165	8248	8246	8102	8236	8245	8077	8326	8355	8063	8493	8465	7797	8589	8281	8277	8626	7903	8411	8441	8327
1;2	8287	8349	8203	8066	7928	8094	8457	8086	7990	8493	7952	8466	8390	8457	8784	8385	8690	8796	8482	8391	8718	8577	8894	9043	8677	8774	8781	8457	9143	9063	9202	9039	9132	9043	8892	9155	9398	9161	9625	9374	8780	9568	9357	9442	9723	9116	9368	9457	9433
2;1	7265	7143	8199	6702	6601	6533	7521	7652	7942	8096	6505	6846	7413	8299	8183	7683	7573	7169	7650	8367	7889	8309	7694	8472	8009	7599	8241	8528	8752	8239	8627	8750	7965	9046	7954	8228	8753	7787	9307	9107	7485	8659	9013	9070	7520	7467	8642	7764	7858
2;2	6328	6070	7002	6029	6116	6871	6896	7382	7568	7521	6851	6682	7176	7790	7591	7158	7184	7091	7248	7786	7393	7815	7197	7906	7521	7863	7719	8272	8319	7834	8381	8481	7708	8634	8224	8545	8682	7822	8693	8694	8282	8186	8552	8614	8011	8224	8400	8463	8138
Cycles / Well
ERK3 KD 0.5	1	2	3	4	5	6	7	8	9	10	11	12	13	14	15	16	17	18	19	20	21	22	23	24	25	26	27	28	29	30	31	32	33	34	35	36	37	38	39	40	41	42	43	44	45	46	47	48	49
Time [s]	0	30.015	60.029	90.044	120.058	150.07	180.085	210.095	240.111	270.124	300.138	330.153	360.18	390.196	420.226	450.256	480.284	510.297	540.321	570.34	600.376	630.385	660.397	690.411	720.424	750.448	780.47	810.494	840.508	870.522	900.554	930.579	960.608	990.618	1020.63	1050.64	1080.66	1110.67	1140.7	1170.72	1200.75	1230.76	1260.79	1290.8	1320.82	1350.83	1380.86	1410.87	1440.89
Temp. [°C]	27.2	27.2	27.3	27.5	27.5	27.6	27.6	27.4	27.4	27.5	27.3	27.2	27.2	27.3	27.4	27.5	27.7	27.8	27.6	27.4	27.2	27.1	27	27.1	27.3	27.4	27.6	27.7	27.7	27.6	27.4	27.4	27.2	27.2	27.2	27.4	27.6	27.8	27.8	27.6	27.4	27.3	27.1	27.1	27.2	27.4	27.7	27.8	27.8
Mean	9099	9077.25	8801.5	8989.5	8818.75	8659.75	9209	9481.5	9375	9551.5	8962.25	9720.25	9832	9561.75	9579	9460	9949.25	10015.2	9971	10507.5	10374.2	9541.75	9889.25	10160.8	9974.25	10013.2	10615.2	10440.2	10255	10711.8	10149.2	11124.5	10723.5	10561.5	11289.8	10405.8	10979	10972	11129.2	10979.8	10621.8	10900.5	11124	11013.5	10787.2	11432.5	11333.8	10978.2	11325.8
StDev	997.967	970.363	1053.26	674.092	543.319	805.939	850.017	583.44	447.472	729	536.525	615.731	660.628	581.476	1004.42	669.121	745.122	567.279	618.418	534.963	631.597	599.108	801.337	451.796	884.755	671.758	503.134	594.446	556.809	686.787	570.246	532.106	904.336	832.438	425.971	616.713	435.542	518.2	546.733	619.994	686.221	965.703	420.667	656.181	473.43	579.269	797.686	892.461	863.354
1;1	9117	9070	9172	8146	8376	8779	9263	8865	8765	9597	8496	9702	9545	9363	9791	9503	9826	9716	9186	9984	10126	9443	9779	9996	10110	9519	10216	9749	10404	9780	9760	10506	10829	10885	10978	10374	10367	10656	10364	11148	10386	11284	10925	10904	10233	10632	11288	11170	11467
1;2	10271	10217	10023	9361	9608	9740	10263	9956	9782	10468	9659	10584	10766	10416	10855	10362	10894	10752	10192	10794	11095	10363	11000	10680	11108	10994	11029	10524	10933	10776	10783	11235	11941	11484	11781	11200	11238	11745	11599	11705	11536	12088	11724	11947	11389	11596	12402	12079	12485
2;1	9177	9176	8470	9674	8588	8215	9124	10003	9622	9451	8588	9427	9778	9111	9186	8786	9997	10141	10655	11113	10640	9437	9089	10339	9685	9649	11071	11186	10072	11434	10470	11782	9856	9522	11508	9694	11336	10787	11430	10217	9901	10172	10764	10787	10795	12012	11171	9941	10560
2;2	7831	7846	7541	8777	8703	7905	8186	9102	9331	8690	9106	9168	9239	9357	8484	9189	9080	9452	9851	10139	9636	8924	9689	9628	8994	9891	10145	10302	9611	10857	9584	10975	10268	10355	10892	10355	10975	10700	11124	10849	10664	10058	11083	10416	10732	11490	10474	10723	10791
Cycles / Well
A11	1	2	3	4	5	6	7	8	9	10	11	12	13	14	15	16	17	18	19	20	21	22	23	24	25	26	27	28	29	30	31	32	33	34	35	36	37	38	39	40	41	42	43	44	45	46	47	48	49
Time [s]	0	30.015	60.029	90.044	120.058	150.07	180.085	210.095	240.111	270.124	300.138	330.153	360.18	390.196	420.226	450.256	480.284	510.297	540.321	570.34	600.376	630.385	660.397	690.411	720.424	750.448	780.47	810.494	840.508	870.522	900.554	930.579	960.608	990.618	1020.63	1050.64	1080.66	1110.67	1140.7	1170.72	1200.75	1230.76	1260.79	1290.8	1320.82	1350.83	1380.86	1410.87	1440.89
Temp. [°C]	27.2	27.2	27.3	27.5	27.5	27.6	27.6	27.4	27.4	27.5	27.3	27.2	27.2	27.3	27.4	27.5	27.7	27.8	27.6	27.4	27.2	27.1	27	27.1	27.3	27.4	27.6	27.7	27.7	27.6	27.4	27.4	27.2	27.2	27.2	27.4	27.6	27.8	27.8	27.6	27.4	27.3	27.1	27.1	27.2	27.4	27.7	27.8	27.8
Mean	10281.5	10119	10665	10818.2	9896.75	11092	11241.5	10736	10723.5	11725.2	10572.8	10646.5	11362	10906.2	11334.8	11564.5	11583.5	11219.8	12022.8	11810.5	12035.2	11128	11309	12525.8	11760.2	11449	12236.2	12183	11940	12151.8	12474.2	12499.2	12284	12709.8	12179.2	12091	13057.8	12463.2	12965	13180.8	12797	12656.2	13008.8	13039.8	13064.8	12714.8	12734	13400	12975.5
StDev	1405.68	1296.07	1091.7	665.278	1080.96	796.567	754.816	1014.14	828.471	620.365	1052.04	648.529	754.85	983.346	665.953	1298.41	514.41	834.608	691.652	572.895	703.782	983.262	827.272	921.216	1430.37	1107.39	569.296	609.647	844.001	589.002	1133.93	601.958	789.745	1128.48	828.743	1034.35	786.605	982.169	942.079	885.433	826.391	1126.25	844.429	1450.2	602.339	1021.16	1109.44	1042.43	1580.33
1;1	10300	10255	10619	10745	9881	10775	11134	11042	10735	11087	10415	10357	11305	10835	11147	11509	11266	11131	11259	11104	11854	10774	11071	12304	11994	11263	11486	11761	11736	11755	12138	11984	11142	12297	11467	11879	12753	12551	12805	12910	12364	12421	12639	13030	12639	12675	12901	12640	12951
1;2	12071	11874	12205	11780	11316	12192	12307	12002	11891	12415	11982	11609	12403	12182	12290	13323	12344	12325	12582	12214	12954	12457	12447	13831	13693	13045	12775	12904	13039	12964	14136	13370	12911	14357	13377	13397	14195	13812	14341	14491	14032	14120	14224	14977	13797	14074	14131	14869	15176
2;1	10116	9450	9711	10411	8692	11079	10990	9673	10155	12067	9434	10198	11133	9783	11161	10207	11271	10297	12634	12334	12077	10124	10474	12305	10656	10517	12562	12465	10999	12206	12040	12312	12685	11797	11955	10888	12890	11612	12403	12765	12481	11389	12876	11485	13314	11603	11457	13415	11512
2;2	8639	8897	10125	10337	9698	10322	10535	10227	10113	11332	10460	10422	10607	10825	10741	11219	11453	11126	11616	11590	11256	11157	11244	11663	10698	10971	12122	11602	11986	11682	11583	12331	12398	12388	11918	12200	12393	11878	12311	12557	12311	12695	12296	12667	12509	12507	12447	12676	12263
Cycles / Well
A12	1	2	3	4	5	6	7	8	9	10	11	12	13	14	15	16	17	18	19	20	21	22	23	24	25	26	27	28	29	30	31	32	33	34	35	36	37	38	39	40	41	42	43	44	45	46	47	48	49
Time [s]	0	30.015	60.029	90.044	120.058	150.07	180.085	210.095	240.111	270.124	300.138	330.153	360.18	390.196	420.226	450.256	480.284	510.297	540.321	570.34	600.376	630.385	660.397	690.411	720.424	750.448	780.47	810.494	840.508	870.522	900.554	930.579	960.608	990.618	1020.63	1050.64	1080.66	1110.67	1140.7	1170.72	1200.75	1230.76	1260.79	1290.8	1320.82	1350.83	1380.86	1410.87	1440.89
Temp. [°C]	27.2	27.2	27.3	27.5	27.5	27.6	27.6	27.4	27.4	27.5	27.3	27.2	27.2	27.3	27.4	27.5	27.7	27.8	27.6	27.4	27.2	27.1	27	27.1	27.3	27.4	27.6	27.7	27.7	27.6	27.4	27.4	27.2	27.2	27.2	27.4	27.6	27.8	27.8	27.6	27.4	27.3	27.1	27.1	27.2	27.4	27.7	27.8	27.8
Mean	10361	10053.8	10703.8	10235.8	10705.8	10776.8	10666.2	10516	10644.8	10411.8	10892	11386	10435.8	11348.2	11496.2	11389.5	10937.2	11431	11698	11297.2	11681.2	11811	12144.2	11729	11498.8	11844.5	11999.8	11753.8	12522	11926.8	12966	11819.8	12201.5	12467.8	12891.2	12087.8	12147.5	12349.2	13150.8	12643.5	12755.2	12596.8	12803.2	12570.8	12640.2	12805	12488.2	12795.5	13552.8
StDev	1181.84	1390.32	798.352	1078.57	807.421	893.279	1160.25	1161.49	1592.5	951.721	1093.56	760.761	972.971	915.967	819.04	697.947	1146.56	561.319	638.939	624.473	821.51	646.745	708.169	1160.84	1768.07	945.53	686.724	893.531	745.239	1059.02	768.573	1168.36	1141.68	796.901	791.897	1373.64	1692.86	939.417	848.291	1285.82	838.465	974.417	882.344	1026.1	734.729	1470.72	1183.37	1414.95	877.875
1;1	9989	9976	10103	10169	9853	10173	10773	10598	10808	10336	10790	10922	9817	11093	11062	10482	11036	10743	11069	10684	11149	11086	11600	11931	11843	10533	11388	10691	12036	12002	12587	11854	12269	12147	12291	12202	12816	11068	12438	12909	12114	11999	11774	12103	12102	12887	12130	13144	12879
1;2	12070	11828	11721	11773	11682	11997	12244	12078	12833	11748	12416	12465	11887	12702	12716	12060	12467	12081	12452	12165	12822	12632	13147	13270	13833	12770	12982	12793	13633	13383	14112	13411	13738	13660	14031	13897	14233	13278	14358	14250	13989	14023	13876	14004	13665	14773	14128	14652	14823
2;1	10037	9982	10959	9644	11010	10887	9580	10047	9588	9525	9832	11368	9972	10888	11221	11791	9757	11606	11991	11235	11734	11922	12136	11090	9825	12162	11874	12070	12222	11342	12685	10660	11040	12009	12817	10614	10704	12727	13092	11180	12449	11944	13031	11630	12681	11276	11317	11753	13072
2;2	9348	8429	10032	9357	10278	10050	10068	9341	9350	10038	10530	10789	10067	10710	10986	11225	10489	11294	11280	11105	11020	11604	11694	10625	10494	11913	11755	11461	12197	10980	12480	11354	11759	12055	12426	11638	10837	12324	12715	12235	12469	12421	12532	12546	12113	12284	12378	11633	13437
Cycles / Well
ERK3 KD 1	1	2	3	4	5	6	7	8	9	10	11	12	13	14	15	16	17	18	19	20	21	22	23	24	25	26	27	28	29	30	31	32	33	34	35	36	37	38	39	40	41	42	43	44	45	46	47	48	49
Time [s]	0	30.015	60.029	90.044	120.058	150.07	180.085	210.095	240.111	270.124	300.138	330.153	360.18	390.196	420.226	450.256	480.284	510.297	540.321	570.34	600.376	630.385	660.397	690.411	720.424	750.448	780.47	810.494	840.508	870.522	900.554	930.579	960.608	990.618	1020.63	1050.64	1080.66	1110.67	1140.7	1170.72	1200.75	1230.76	1260.79	1290.8	1320.82	1350.83	1380.86	1410.87	1440.89
Temp. [°C]	27.2	27.3	27.3	27.6	27.6	27.6	27.5	27.4	27.5	27.5	27.3	27.2	27.2	27.3	27.4	27.5	27.7	27.8	27.6	27.4	27.3	27.1	27.1	27.2	27.3	27.4	27.7	27.7	27.7	27.6	27.4	27.4	27.3	27.2	27.3	27.4	27.7	27.8	27.8	27.6	27.4	27.3	27.1	27.1	27.2	27.4	27.7	27.9	27.8
Mean	9820	10815.8	9987.75	10870	10698.2	11137.2	10709.5	10426.8	11540.5	10727	11397.2	11795.2	11836	12238.2	11119.2	12051	11695.8	11699.8	13170.2	12990	12037	12481	13752.5	12475.8	13021.2	12989.8	13824.5	12998	14307.2	14024.8	13562	14302.5	14370.2	15104.8	15198	15114.2	14761	14968.2	14789	15054.2	15277.5	15386.2	15355	15330.5	15414	17091.5	16592	16594.5	16956.8
StDev	1392.54	986.51	620.04	762.609	655.981	590.814	800.085	399.764	622.934	541.66	941.261	1218.04	372.025	580.319	1395.98	919.343	611.404	909.669	869.381	985.478	1022.26	1632.13	1235.76	1285.4	1084.09	1207.16	1730.22	1342.59	824.644	1453.85	789.907	1377.38	862.889	1344.43	1269.56	1160.84	1336.91	1822.12	845.84	1136.79	1848.26	1792.26	1240.4	1044.13	1165.95	1537.45	1249.45	1567.27	1251.08
1;1	11258	11327	10190	11395	11114	11040	10940	10657	12123	11125	11254	11368	11906	11903	11760	12928	11440	11747	13398	13580	11969	13674	14653	12257	12450	12199	14133	12461	14225	12928	12922	14270	13757	14195	16316	14606	14289	15435	14127	13818	13955	13921	14400	15200	14642	15731	15987	15489	16013
1;2	10768	11850	10772	11642	11242	11980	11555	10819	12035	10704	12608	13556	11848	13103	12773	12762	12604	12917	14300	14027	13409	13991	14979	14326	14645	14785	16151	14979	15440	16128	14697	16103	15648	17069	16145	16829	16608	17339	16014	16571	17983	17932	17172	16824	17122	19250	18447	18909	18761
2;1	8674	10487	9568	10348	10644	10922	10707	10314	10989	11110	10315	10755	12246	11903	10157	11252	11274	11383	12586	12465	11831	11693	12734	11938	12428	12390	12479	12552	14097	13199	13154	12753	13992	14277	13638	14270	13448	13330	14351	14848	14252	14385	15048	14866	15198	17055	15749	15818	16826
2;2	8580	9599	9421	10095	9793	10607	9636	9917	11015	9969	11412	11502	11344	12044	9787	11262	11465	10752	12397	11888	10939	10566	12644	11382	12562	12585	12535	12000	13467	13844	13475	14084	14084	14878	14693	14752	14699	13769	14664	14980	14920	15307	14800	14432	14694	16330	16185	16162	16227
Cycles / Well
B2	1	2	3	4	5	6	7	8	9	10	11	12	13	14	15	16	17	18	19	20	21	22	23	24	25	26	27	28	29	30	31	32	33	34	35	36	37	38	39	40	41	42	43	44	45	46	47	48	49
Time [s]	0	30.015	60.029	90.044	120.058	150.07	180.085	210.095	240.111	270.124	300.138	330.153	360.18	390.196	420.226	450.256	480.284	510.297	540.321	570.34	600.376	630.385	660.397	690.411	720.424	750.448	780.47	810.494	840.508	870.522	900.554	930.579	960.608	990.618	1020.63	1050.64	1080.66	1110.67	1140.7	1170.72	1200.75	1230.76	1260.79	1290.8	1320.82	1350.83	1380.86	1410.87	1440.89
Temp. [°C]	27.2	27.3	27.3	27.6	27.6	27.6	27.5	27.4	27.5	27.5	27.3	27.2	27.2	27.3	27.4	27.5	27.7	27.8	27.6	27.4	27.3	27.1	27.1	27.2	27.3	27.4	27.7	27.7	27.7	27.6	27.4	27.4	27.3	27.2	27.3	27.4	27.7	27.8	27.8	27.6	27.4	27.3	27.1	27.1	27.2	27.4	27.7	27.9	27.8
Mean	8820	9200.75	9127.5	8946	9222.5	10368.2	10389.5	9467.5	10254.5	9915.75	10457.8	10759.2	10236.5	10365.5	10902	11266.8	11137	11087.5	10964	11467	11440.8	11158.2	11743.8	12141.2	11517	12335.8	12276.2	12074	12827.5	11901.8	12044	12448	12213.8	12647.2	12785.2	12990	12441.2	13055.8	13185.8	13725	13800.8	13388.2	13321	13371.8	13553.8	13416.8	14366.8	13672	14201.5
StDev	1120.32	907.063	650.504	1345.27	828.556	663.865	766.718	919.604	685.405	361.928	1155.74	1570.81	800.302	733.195	837.893	725.074	719.761	1077.56	1190.59	810.46	1011.81	1203.51	1543	1057.68	1173.24	705.197	1090.1	829.768	736.854	1441.98	1204.43	1110.38	1193.93	1391.15	1018.53	1180.37	1388.87	1213.07	685.11	952.818	1247.65	1361.98	1335.28	1064.85	1588.54	1607.29	1181.29	1590.22	1402.3
1;1	9890	9603	9573	9416	8945	10113	9942	9368	10016	9847	11364	11865	10222	10134	10112	11801	10689	10091	10118	11360	11272	10594	12562	12557	11274	12449	12298	11812	12919	12641	11853	11593	11512	12723	12098	12168	11876	12877	13338	14032	13673	12304	12199	12483	13978	14599	13632	12798	13376
1;2	9685	10289	9742	10597	10455	11323	11526	10793	11276	10445	11515	12325	11342	11446	12064	11951	12211	12617	12712	12635	12919	12943	13476	13446	13239	13280	13783	13304	13822	13552	13756	14073	13933	14508	14285	14713	14474	14776	14081	14904	15591	15307	15257	14915	15611	14953	16101	16039	16299
2;1	7860	8380	8854	8227	8806	10243	9914	8951	9828	9718	9211	9141	9919	9816	10893	10859	10869	10888	10320	10810	10777	10768	10137	11261	10702	11926	11261	11502	12429	10469	10946	11939	11311	11198	12205	12285	11348	11942	12530	12722	12787	12547	12841	13134	12114	11672	14131	12696	13497
2;2	7845	8531	8341	7544	8684	9794	10176	8758	9898	9653	9741	9706	9463	10066	10539	10456	10779	10754	10706	11063	10795	10328	10800	11301	10853	11688	11763	11678	12140	10945	11621	12187	12099	12160	12553	12794	12067	12628	12794	13242	13152	13395	12987	12955	12512	12443	13603	13155	13634
Cycles / Well
B3	1	2	3	4	5	6	7	8	9	10	11	12	13	14	15	16	17	18	19	20	21	22	23	24	25	26	27	28	29	30	31	32	33	34	35	36	37	38	39	40	41	42	43	44	45	46	47	48	49
Time [s]	0	30.015	60.029	90.044	120.058	150.07	180.085	210.095	240.111	270.124	300.138	330.153	360.18	390.196	420.226	450.256	480.284	510.297	540.321	570.34	600.376	630.385	660.397	690.411	720.424	750.448	780.47	810.494	840.508	870.522	900.554	930.579	960.608	990.618	1020.63	1050.64	1080.66	1110.67	1140.7	1170.72	1200.75	1230.76	1260.79	1290.8	1320.82	1350.83	1380.86	1410.87	1440.89
Temp. [°C]	27.2	27.3	27.3	27.6	27.6	27.6	27.5	27.4	27.5	27.5	27.3	27.2	27.2	27.3	27.4	27.5	27.7	27.8	27.6	27.4	27.3	27.1	27.1	27.2	27.3	27.4	27.7	27.7	27.7	27.6	27.4	27.4	27.3	27.2	27.3	27.4	27.7	27.8	27.8	27.6	27.4	27.3	27.1	27.1	27.2	27.4	27.7	27.9	27.8
Mean	8548.5	9260.25	9480.25	9712	10151.2	9953.5	9863.5	9960.75	9966.25	9866.25	10791.5	10609	10091.2	10441.5	10864.2	10236	10311.5	10819.8	10614.2	10757.2	11032.5	11350	11319.2	10840.8	11645	11266.2	12094.5	11414.2	11609	11909	11804.8	12443.2	11480.5	11742.5	11450.8	11851.5	12280.5	12638.2	12810.2	12215.5	12064.5	12294.2	12148.2	12825.5	12980.2	13580.8	12028.2	12891.8	12551
StDev	863.421	869.823	1090.28	1248.95	308.368	1302.07	1110.09	476.379	1000.05	562.493	829.267	1465.61	686.974	622.785	970.413	936.758	1228.99	1090.08	787.432	958.346	930.193	1127.09	1209.5	1085.72	986.097	1186.33	1213.92	870.502	1086.12	906.54	1047.43	870.141	602.855	639.966	602.537	1119.02	856.049	1093.57	524.355	612.129	1043.1	375.924	694.287	431.9	692.328	763.88	988.764	798.469	1575.86
1;1	8939	9769	9638	10587	9959	10559	9956	9357	9519	9667	11337	11222	9829	9817	11225	9820	10008	10200	9733	9978	10159	10834	11368	10266	10892	10203	11998	11256	12292	11119	10709	12303	10768	11034	11233	12833	12475	11455	12876	11860	11596	12053	11995	12826	13143	13977	12041	13452	13484
1;2	9566	10222	10824	10969	10503	11480	11382	10488	11426	10705	11621	12267	11118	11241	12023	11640	12116	12365	11566	12040	12285	13036	12996	12464	13000	12949	13817	12689	12726	13015	13157	13662	12214	12573	12314	12786	13412	14061	13506	13127	13589	12828	13022	13433	13893	13815	13420	13700	14278
2;1	8014	8476	9281	8471	10308	8646	8852	10132	9180	9574	9847	8865	9726	10110	9790	9732	9393	9930	10283	10072	10533	10671	10249	10420	11752	10772	11034	10857	10389	12284	12015	11600	11321	11803	11338	10688	11642	12778	12582	11859	11251	12286	12235	12575	12441	14084	11257	12275	11049
2;2	7675	8574	8178	8821	9835	9129	9264	9866	9740	9519	10361	10082	9692	10598	10419	9752	9729	10784	10875	10939	11153	10859	10664	10213	10936	11141	11529	10855	11029	11218	11338	12208	11619	11560	10918	11099	11593	12259	12277	12016	11822	12010	11341	12468	12444	12447	11395	12140	11393
Cycles / Well
ERK3 KD 0.5	1	2	3	4	5	6	7	8	9	10	11	12	13	14	15	16	17	18	19	20	21	22	23	24	25	26	27	28	29	30	31	32	33	34	35	36	37	38	39	40	41	42	43	44	45	46	47	48	49
Time [s]	0	30.015	60.029	90.044	120.058	150.07	180.085	210.095	240.111	270.124	300.138	330.153	360.18	390.196	420.226	450.256	480.284	510.297	540.321	570.34	600.376	630.385	660.397	690.411	720.424	750.448	780.47	810.494	840.508	870.522	900.554	930.579	960.608	990.618	1020.63	1050.64	1080.66	1110.67	1140.7	1170.72	1200.75	1230.76	1260.79	1290.8	1320.82	1350.83	1380.86	1410.87	1440.89
Temp. [°C]	27.2	27.3	27.3	27.6	27.6	27.6	27.5	27.4	27.5	27.5	27.3	27.2	27.2	27.3	27.4	27.5	27.7	27.8	27.6	27.4	27.3	27.1	27.1	27.2	27.3	27.4	27.7	27.7	27.7	27.6	27.4	27.4	27.3	27.2	27.3	27.4	27.7	27.8	27.8	27.6	27.4	27.3	27.1	27.1	27.2	27.4	27.7	27.9	27.8
Mean	13190.8	13135	13612.2	14767	14434.8	14953	14577.5	15626.2	14766.5	14214.8	16831	15774.2	15831.2	16258.8	16076	17342.2	17914	17220.2	18193.2	17322.5	18157	16903.5	18613.2	18754.2	18218.2	18648.8	19602	20070.5	18827.8	20715.8	20389.8	20908.5	19856.8	20327.8	21354.2	19779	21094.5	21420	20297.2	21799.2	21119.2	21790	22905.5	22060.5	22114.8	23295.2	24066.2	23174.8	23768
StDev	999.091	1863.94	1624.95	926.496	2013.63	740.597	1701.55	1558.36	1068.74	1329.98	751.059	1404.27	1693.5	835.131	846.658	628.621	667.098	1457	1907.24	1423.36	1559.29	1548.43	1785.45	1321.3	1028.7	1176.91	1868.71	878.122	2556.49	1229.94	1460.64	1845.17	1293.63	701.289	874.305	1192.01	1268.54	2074.37	2206.52	3093.4	1998.73	1812.34	1415.2	1608.81	1883.52	2238.77	1489.54	1489.8	2072.53
1;1	13758	14229	14415	14881	15696	14802	15925	16984	15535	14990	17094	16134	16587	16599	15937	16935	18261	18524	19628	17467	17242	16733	19916	18119	17609	17496	19004	19886	20353	20772	21139	21742	18748	19334	21561	19142	19432	21168	20364	23376	20383	20966	23835	20937	20906	24647	25121	22279	24007
1;2	13852	15142	15514	16013	16424	16038	16157	16936	15795	15522	17706	17522	17848	17234	17123	18215	18433	18350	20045	19264	20455	19032	20381	20733	19584	20255	22280	21308	21593	22379	22079	23065	21475	20810	22464	21557	22277	24330	23386	25368	23937	24494	24309	24426	24836	25726	25551	25365	26573
2;1	13437	12026	12300	14293	13626	14418	12900	14583	13582	13817	16586	14215	14692	15884	15064	17383	16947	15539	16439	16516	17134	15326	17195	17993	17269	18154	17936	19233	17146	20237	19249	18967	18880	20833	20420	19059	21859	19441	18923	18875	19261	20631	21263	21179	20796	21133	22557	22195	21841
2;2	11716	11143	12220	13881	11993	14554	13328	14002	14154	12530	15938	15226	14198	15318	16180	16836	18015	16468	16661	16043	17797	16523	16961	18172	18411	18690	19188	19855	16219	19475	19092	19860	20324	20334	20972	19358	20810	20741	18516	19578	20896	21069	22215	21700	21921	21675	23036	22860	22651
Cycles / Well
B5	1	2	3	4	5	6	7	8	9	10	11	12	13	14	15	16	17	18	19	20	21	22	23	24	25	26	27	28	29	30	31	32	33	34	35	36	37	38	39	40	41	42	43	44	45	46	47	48	49
Time [s]	0	30.015	60.029	90.044	120.058	150.07	180.085	210.095	240.111	270.124	300.138	330.153	360.18	390.196	420.226	450.256	480.284	510.297	540.321	570.34	600.376	630.385	660.397	690.411	720.424	750.448	780.47	810.494	840.508	870.522	900.554	930.579	960.608	990.618	1020.63	1050.64	1080.66	1110.67	1140.7	1170.72	1200.75	1230.76	1260.79	1290.8	1320.82	1350.83	1380.86	1410.87	1440.89
Temp. [°C]	27.2	27.3	27.3	27.6	27.5	27.6	27.6	27.4	27.4	27.5	27.3	27.2	27.2	27.3	27.4	27.5	27.7	27.8	27.6	27.4	27.3	27.1	27.1	27.2	27.3	27.4	27.7	27.7	27.7	27.6	27.4	27.4	27.3	27.2	27.3	27.4	27.7	27.8	27.8	27.6	27.4	27.3	27.1	27.1	27.2	27.4	27.7	27.9	27.8
Mean	9820.5	10202.5	9632	9832.75	10448.2	10476	9904.75	10161.2	10309	11032.2	11093.2	11459.8	11169.8	11359.2	11287.5	11712	11857.8	11943	11435.8	12104.8	12846.8	13036.2	13267.8	12503.2	13681	14120	13063	13208.2	14011	13762.2	13474.2	13415	13617.8	15058.8	13990.8	14717.8	15424.8	14900	14865.8	14645.5	15351.2	15090	15682	14852	15142	15262.2	16742	15669.8	15844
StDev	1485.38	472.176	769.335	1411.61	1300.67	1241.4	716.419	741.035	506.772	783.619	796.493	781.521	835.084	785.382	924.602	1716.69	796.614	822.004	671.276	649.864	464.031	690.607	1620.2	1395.38	1205.57	1036.54	1073.91	857.607	789.952	783.26	1351.96	765.841	946.369	426.036	984.642	614.087	622.924	641.556	510.112	1100.29	657.472	789.881	307.678	937.896	652.143	686.901	1388.46	528.651	1222.51
1;1	10584	10103	10201	11285	11864	11452	10524	10891	10650	10955	11748	11973	11629	11246	12421	12930	11751	12385	12045	12937	12886	13090	14709	13546	14271	13470	13735	13493	13431	13700	14191	13886	13797	14420	14820	15086	14748	14250	15401	15629	15648	15918	15326	15565	15094	15273	17897	15782	16248
1;2	11203	10703	10298	10728	11241	11609	10514	10683	10770	10710	11104	12076	11463	11184	11559	13432	11985	11665	11659	12305	13014	13291	14515	13866	14633	13696	14219	13841	13765	14379	14805	14233	14422	15290	14514	14987	15678	15731	15185	15565	16139	15613	15544	15757	16076	16169	17836	16349	17389
2;1	7793	9597	8664	8264	9387	9707	9167	9708	10153	12141	11552	11420	11663	12443	10916	10447	12816	12794	11560	11613	13289	13693	12484	11258	13889	15668	12125	13557	15177	14292	13193	12633	13999	15265	14033	14999	16162	14580	14322	13759	14817	14418	16019	14079	14633	14510	16219	15114	14739
2;2	9702	10407	9365	9054	9301	9136	9414	9363	9663	10323	9969	10370	9924	10564	10254	10039	10879	10928	10479	11564	12198	12071	11363	11343	11931	13646	12173	11942	13671	12678	11708	12908	12253	15260	12596	13799	15111	15039	14555	13629	14801	14411	15839	14007	14765	15097	15016	15434	15000
Cycles / Well
ERK3 KD 2	1	2	3	4	5	6	7	8	9	10	11	12	13	14	15	16	17	18	19	20	21	22	23	24	25	26	27	28	29	30	31	32	33	34	35	36	37	38	39	40	41	42	43	44	45	46	47	48	49
Time [s]	0	30.015	60.029	90.044	120.058	150.07	180.085	210.095	240.111	270.124	300.138	330.153	360.18	390.196	420.226	450.256	480.284	510.297	540.321	570.34	600.376	630.385	660.397	690.411	720.424	750.448	780.47	810.494	840.508	870.522	900.554	930.579	960.608	990.618	1020.63	1050.64	1080.66	1110.67	1140.7	1170.72	1200.75	1230.76	1260.79	1290.8	1320.82	1350.83	1380.86	1410.87	1440.89
Temp. [°C]	27.2	27.3	27.3	27.6	27.5	27.6	27.6	27.4	27.4	27.5	27.3	27.2	27.2	27.3	27.4	27.5	27.7	27.8	27.6	27.4	27.2	27.1	27	27.2	27.3	27.4	27.6	27.7	27.7	27.6	27.4	27.4	27.2	27.2	27.2	27.4	27.7	27.8	27.8	27.6	27.4	27.3	27.1	27.1	27.2	27.4	27.7	27.9	27.8
Mean	11524.8	11422	11972.8	12274.2	11901.2	11732	12611	12164.5	12899.2	13159	12873	14002.8	13326	14768.2	13353.8	13611.8	14594	14059	14803	14871.5	14915	14860.8	15478.8	15161.8	16339.8	16229.8	16166	16940	17810	15484.2	16475	17276.8	17535.5	17598.2	18305.8	18148.5	17714	17680.2	18102.8	17477.5	18982.8	18736	19478	19372.5	18917.8	19493.5	19481	19037.2	19097.2
StDev	1262.24	966.077	867.885	1029.43	704.88	1494.97	439.237	756.292	607.058	286.86	1043.86	306.304	841.888	661.63	964.559	1394.31	359.345	666.144	260.072	655.486	1042.7	450.553	1088.13	681.773	1778.97	957.75	910.553	936.477	722.201	1407.09	1039.72	1606	424.718	625.157	1500.99	690.276	1543.25	1402.48	872.432	959.857	1518.19	1642.9	1258.55	1348.18	999.62	1173.77	1505.06	1196.99	1429.94
1;1	12142	11933	12408	12689	11999	12731	12576	12382	13050	12867	13563	13652	13461	15269	13722	14395	14572	13520	14679	14445	15214	14604	15784	14949	17755	16840	16612	17618	18520	14829	16195	18505	17380	17447	19527	18221	18673	18557	17708	16599	20450	20219	20518	18076	19239	20291	20563	19115	19632
1;2	12845	12328	12806	13206	12631	13283	13168	12994	13675	13172	13930	14252	14399	15398	14482	15056	15089	14873	15147	15829	16260	15525	16858	16169	17963	17165	17197	17720	18331	17475	17857	18815	18142	18374	19515	18773	19302	19096	19203	18323	20133	20097	20615	19407	20141	20685	20980	20701	20803
2;1	11180	11311	11873	12386	12038	10615	12606	12106	12597	13546	12273	14267	13059	14319	12243	11927	14480	13509	14543	14763	14016	14754	14899	14862	15167	15063	15687	15711	17069	14244	15355	15759	17156	16866	16438	17171	15961	16034	17172	16695	17593	17286	18452	21223	18466	18722	18344	18229	17514
2;2	9932	10116	10804	10816	10937	10299	12094	11176	12275	13051	11726	13840	12385	14087	12968	13069	14235	14334	14843	14449	14170	14560	14374	14667	14474	15851	15168	16711	17320	15389	16493	16028	17464	17706	17743	18429	16920	17034	18328	18293	17755	17342	18327	18784	17825	18276	18037	18104	18440
Cycles / Well
B7	1	2	3	4	5	6	7	8	9	10	11	12	13	14	15	16	17	18	19	20	21	22	23	24	25	26	27	28	29	30	31	32	33	34	35	36	37	38	39	40	41	42	43	44	45	46	47	48	49
Time [s]	0	30.015	60.029	90.044	120.058	150.07	180.085	210.095	240.111	270.124	300.138	330.153	360.18	390.196	420.226	450.256	480.284	510.297	540.321	570.34	600.376	630.385	660.397	690.411	720.424	750.448	780.47	810.494	840.508	870.522	900.554	930.579	960.608	990.618	1020.63	1050.64	1080.66	1110.67	1140.7	1170.72	1200.75	1230.76	1260.79	1290.8	1320.82	1350.83	1380.86	1410.87	1440.89
Temp. [°C]	27.2	27.3	27.3	27.6	27.5	27.6	27.6	27.4	27.4	27.5	27.3	27.2	27.2	27.3	27.4	27.5	27.7	27.8	27.6	27.4	27.2	27.1	27	27.2	27.3	27.4	27.6	27.7	27.7	27.6	27.4	27.4	27.2	27.2	27.2	27.4	27.6	27.8	27.8	27.6	27.4	27.3	27.1	27.1	27.2	27.4	27.7	27.9	27.8
Mean	5374	5147.5	5102	5178	5335	5438	5273	5623.25	5211.75	5599.25	5641.75	5380.5	5654.5	5386	5509.75	5299	5526.5	5617	5746	5551	5380.75	5265.75	5775.75	5626	5830.75	6146.25	5560.75	5934.75	5792.5	5528.75	5971.25	5966.5	5943.75	5959.25	5704	6189.5	6283.25	6385.75	5852.5	6126.75	6236.5	6158.25	6413.75	6131.5	5748	6278.5	6268.25	6827	6351.5
StDev	165.745	477.254	613.205	378.389	186.279	211.021	117.405	674.172	313.577	319.861	342.653	325.079	365.86	344.685	291.348	816.393	340.492	270.268	282.287	656.412	525.1	642.429	430.802	711.282	543.628	347.512	401.325	435.918	251.903	729.324	239.025	361.17	314.532	223.504	547.539	273.75	241.325	241.961	345.935	339.485	425.087	372.414	590.434	366.07	419.052	288.202	248.23	665.672	290.16
1;1	5234	5413	5724	5410	5228	5422	5327	5374	5398	5883	5782	5588	6021	5502	5525	6151	5567	5662	5903	6144	5796	5845	5965	6304	6262	6196	5601	5742	5887	6198	5837	5874	6119	6056	6129	6415	6195	6263	6125	6340	6014	6204	7098	6477	5996	6336	6283	6348	6435
1;2	5553	5637	5533	5539	5252	5401	5413	5375	5287	5662	5546	5551	5584	5368	5370	5844	5528	5674	5813	6053	5760	5797	6031	6044	6215	6354	5921	5674	5846	6092	5768	5662	6131	6016	6193	6286	6232	6295	6140	6064	6023	6082	6708	6270	6198	6315	6187	6652	6519
2;1	5232	4980	4598	4695	5614	5720	5173	6619	5413	5711	6021	5486	5837	5748	5909	4581	5921	5889	5938	5215	5296	4754	5976	5454	5755	6394	5729	6587	6008	5101	6306	6490	6050	6133	5423	6266	6631	6747	5723	6429	6874	6625	6003	6160	5497	6578	6598	7808	6531
2;2	5477	4560	4553	5068	5246	5209	5179	5125	4749	5141	5218	4897	5176	4926	5235	4620	5090	5243	5330	4792	4671	4667	5131	4702	5091	5641	4992	5736	5429	4724	5974	5840	5475	5632	5071	5791	6075	6238	5422	5674	6035	5722	5846	5619	5301	5885	6005	6500	5921
Cycles / Well
B8	1	2	3	4	5	6	7	8	9	10	11	12	13	14	15	16	17	18	19	20	21	22	23	24	25	26	27	28	29	30	31	32	33	34	35	36	37	38	39	40	41	42	43	44	45	46	47	48	49
Time [s]	0	30.015	60.029	90.044	120.058	150.07	180.085	210.095	240.111	270.124	300.138	330.153	360.18	390.196	420.226	450.256	480.284	510.297	540.321	570.34	600.376	630.385	660.397	690.411	720.424	750.448	780.47	810.494	840.508	870.522	900.554	930.579	960.608	990.618	1020.63	1050.64	1080.66	1110.67	1140.7	1170.72	1200.75	1230.76	1260.79	1290.8	1320.82	1350.83	1380.86	1410.87	1440.89
Temp. [°C]	27.2	27.3	27.3	27.6	27.5	27.6	27.6	27.4	27.4	27.5	27.3	27.2	27.2	27.3	27.4	27.5	27.7	27.8	27.6	27.4	27.2	27.1	27	27.2	27.3	27.4	27.6	27.7	27.7	27.6	27.4	27.4	27.2	27.2	27.2	27.4	27.6	27.8	27.8	27.6	27.4	27.3	27.1	27.1	27.2	27.4	27.7	27.9	27.8
Mean	6661	6544	6589.25	6503.25	7110.75	6429	6485.75	6783.5	6883.5	6714.5	7069.5	7083.75	6803	7030.5	6916.25	7128.25	7214	6646.25	7313.5	6975	7641.5	6842.75	7270.75	7317.75	7161.75	7579.75	7474.25	7513.25	7616.25	7589.75	7553	7618.25	7144.25	7665	7689.75	8027	7581	7308.75	7589.75	7464.75	8050	7572.5	8320.75	7471	7911.5	7935.5	7749.25	8017.75	8502.25
StDev	409.014	613.628	415.662	537.949	632.35	752.791	680.165	268.544	330.762	302.084	289.411	341.56	191.498	370.105	482.821	194.759	262.083	509.681	431.467	679.831	268.934	805.665	323.712	294.925	433.425	645.568	464.948	393.359	465.64	300.885	388.641	530.055	679.541	289.879	356.47	319.337	338.973	901.741	660.249	326.087	293.03	306.693	417.129	902.18	240.952	424.915	542.921	421.874	537.079
1;1	6550	6876	6557	6366	7466	6823	6851	6561	6860	6676	7132	7104	6714	6958	7027	7012	7215	6866	7360	7341	7553	7353	7197	7155	7024	7851	7643	7609	7743	7447	7342	7686	7480	7561	7586	8069	7404	7897	7916	7159	7990	7242	8311	7874	7662	8083	8064	7892	8769
1;2	7123	7068	7187	6849	7740	7278	7217	6971	7216	7138	7447	7442	6987	7440	7504	7340	7524	7248	7728	7741	8008	7701	7727	7744	7639	8329	8053	7986	8174	8041	7933	8339	7916	8037	8178	8435	8074	8261	8362	7890	8470	7984	8900	8541	8207	8437	8352	8592	9130
2;1	6813	6551	6300	6994	6929	5968	6181	7057	7020	6619	6913	7168	6934	7163	6788	7240	7234	6110	7456	6521	7637	6075	7197	7281	7352	7287	7047	7416	7485	7437	7822	7161	6412	7714	7668	7937	7322	6535	7012	7542	7950	7519	8146	6577	7997	7781	7268	8003	8061
2;2	6158	5681	6313	5804	6308	5647	5694	6545	6438	6425	6786	6621	6577	6561	6346	6921	6883	6361	6710	6297	7368	6242	6962	7091	6632	6852	7154	7042	7063	7434	7115	7287	6769	7348	7327	7667	7524	6542	7069	7268	7790	7545	7926	6892	7780	7441	7313	7584	8049
Cycles / Well
B9	1	2	3	4	5	6	7	8	9	10	11	12	13	14	15	16	17	18	19	20	21	22	23	24	25	26	27	28	29	30	31	32	33	34	35	36	37	38	39	40	41	42	43	44	45	46	47	48	49
Time [s]	0	30.015	60.029	90.044	120.058	150.07	180.085	210.095	240.111	270.124	300.138	330.153	360.18	390.196	420.226	450.256	480.284	510.297	540.321	570.34	600.376	630.385	660.397	690.411	720.424	750.448	780.47	810.494	840.508	870.522	900.554	930.579	960.608	990.618	1020.63	1050.64	1080.66	1110.67	1140.7	1170.72	1200.75	1230.76	1260.79	1290.8	1320.82	1350.83	1380.86	1410.87	1440.89
Temp. [°C]	27.2	27.3	27.3	27.6	27.5	27.6	27.6	27.4	27.4	27.5	27.3	27.2	27.2	27.3	27.4	27.5	27.7	27.8	27.6	27.4	27.2	27.1	27	27.2	27.3	27.4	27.6	27.7	27.7	27.6	27.4	27.4	27.2	27.2	27.2	27.4	27.6	27.8	27.8	27.6	27.4	27.3	27.1	27.1	27.2	27.4	27.7	27.9	27.8
Mean	5766.25	5622.5	5630.75	5776	5737.25	5552	6041.75	6069.75	5993	5700.75	6035.5	6157.5	6085	6259	6350.75	6190	6420.75	6352	6344.75	6534	6685.5	6395	6455.75	6195	6074.5	6473.75	6501.75	6306.5	6278	6309	5918.5	6319	6789	6447.5	6823	6761	7007.25	7202.75	6569.5	7005.25	7023.75	6648.75	6310.75	7100	6995	6877	7217	6574.5	6858
StDev	306.246	531.649	379.214	139.814	467.5	365.72	365.122	453.382	126.378	73.4637	456.62	343.104	329.423	346.78	135.466	196.219	275.586	331.34	384.892	267.291	340.596	390.344	184.339	181.804	332.376	384.785	304.281	373.506	576.825	285.763	564.358	639.954	328.762	643.074	114.158	120.872	660.997	184.091	416.569	235.038	174.95	272.911	219.787	207.511	187.895	203.935	239.07	204.987	444.758
1;1	5698	5717	5818	5777	5907	5701	5755	5805	5875	5726	6407	5906	6132	5972	6372	6107	6220	6224	6592	6580	6994	6412	6329	6402	5869	6786	6658	6530	6822	6048	6292	6823	6572	7075	6803	6813	7752	7308	6862	7105	7181	6357	6524	7115	7076	6665	7317	6720	7201
1;2	6174	6242	5891	5903	6060	5976	5995	5886	5994	5782	6271	5950	6003	6130	6415	5984	6382	6295	6637	6341	6822	6275	6367	6290	6106	6733	6758	6505	6667	6528	6510	6917	6504	6910	6889	6792	7376	7291	6973	7237	7019	6531	6470	6980	7057	6765	7349	6742	7253
2;1	5434	5582	5069	5843	5939	5133	6569	6748	6168	5607	6084	6653	6500	6763	6461	6445	6821	6827	6351	6894	6723	6914	6729	6073	6531	6429	6522	6442	6052	6583	5452	5698	7227	5763	6929	6855	6441	7285	6099	6993	7114	6996	6076	7386	7130	7125	7343	6300	6335
2;2	5759	4949	5745	5581	5043	5398	5848	5840	5935	5688	5380	6121	5705	6171	6155	6224	6260	6062	5799	6321	6203	5979	6398	6015	5792	5947	6069	5749	5571	6077	5420	5838	6853	6042	6671	6584	6460	6927	6344	6686	6781	6711	6173	6919	6717	6953	6859	6536	6643
Cycles / Well
B10	1	2	3	4	5	6	7	8	9	10	11	12	13	14	15	16	17	18	19	20	21	22	23	24	25	26	27	28	29	30	31	32	33	34	35	36	37	38	39	40	41	42	43	44	45	46	47	48	49
Time [s]	0	30.015	60.029	90.044	120.058	150.07	180.085	210.095	240.111	270.124	300.138	330.153	360.18	390.196	420.226	450.256	480.284	510.297	540.321	570.34	600.376	630.385	660.397	690.411	720.424	750.448	780.47	810.494	840.508	870.522	900.554	930.579	960.608	990.618	1020.63	1050.64	1080.66	1110.67	1140.7	1170.72	1200.75	1230.76	1260.79	1290.8	1320.82	1350.83	1380.86	1410.87	1440.89
Temp. [°C]	27.2	27.2	27.3	27.5	27.5	27.6	27.6	27.4	27.4	27.5	27.3	27.2	27.2	27.3	27.4	27.5	27.7	27.8	27.6	27.4	27.2	27.1	27	27.2	27.3	27.4	27.6	27.7	27.7	27.6	27.4	27.4	27.2	27.2	27.2	27.4	27.6	27.8	27.8	27.6	27.4	27.3	27.1	27.1	27.2	27.4	27.7	27.9	27.8
Mean	8451.25	8101.75	8037	8238.75	8307.25	8443	8036.25	8755	8109.75	8581	8546.75	8433	8294	8569.75	8296.25	8921.25	8622.25	8969.75	8302	9210.75	8668	8781.75	9101.75	8709.25	9508	9147.25	9276.25	8795	8631.25	8938.75	8919.25	9479.25	9463.25	9545.75	9553.5	9561.5	9993.5	9445.5	10081	9327.25	9612	9875.25	9305.25	10346.2	10265	10342.2	9805	10123	10426.5
StDev	617.854	307.016	374.211	531.356	705.999	291.926	582.395	281.361	501.862	289.212	291.515	682.287	429.339	359.836	662.637	328.773	380.141	364.181	1200.71	327.654	527.296	439.263	551.163	776.092	412.256	502.412	452.35	281.682	1017.54	1167.97	1080.42	299.066	414.479	391.583	642.654	368.19	222.575	918.941	303.106	1119.67	506.779	510.568	636.205	353.941	417.888	569.075	1036.71	331.726	517.864
1;1	8442	8148	8088	8318	8462	8328	8264	8610	8308	8265	8514	8830	8261	8379	8691	8626	8187	8923	9329	9184	8879	9130	9433	9185	9778	9289	9562	8578	9541	10033	9930	9623	9528	9214	9958	9306	9768	10227	10308	10263	9924	10157	9773	10552	10036	9854	10537	9989	10389
1;2	9161	8518	8547	8565	8758	8684	8736	8976	8723	8754	8633	9031	8517	8731	9022	8978	8558	9093	9296	9278	9120	9193	9704	9543	9844	9368	9457	9125	9443	9861	9695	9659	9464	9413	10111	9562	10072	10255	10370	10312	10007	10108	9795	10485	10219	9995	10854	10114	10592
2;1	8546	7856	7761	8607	8741	8677	7724	9004	7630	8888	8870	8375	8691	8988	7677	9361	9112	9366	6945	9588	8764	8398	8595	7936	9470	9524	9485	8933	7508	8006	7650	9603	9935	10113	9461	10082	10268	8679	9884	8556	9624	10126	9212	10531	10867	11123	8882	10583	10982
2;2	7656	7885	7752	7465	7268	8083	7421	8430	7778	8417	8170	7496	7707	8181	7795	8720	8632	8497	7638	8793	7909	8406	8675	8173	8940	8408	8601	8544	8033	7855	8402	9032	8926	9443	8684	9296	9866	8621	9762	8178	8893	9110	8441	9817	9938	10397	8947	9806	9743
Cycles / Well
B11	1	2	3	4	5	6	7	8	9	10	11	12	13	14	15	16	17	18	19	20	21	22	23	24	25	26	27	28	29	30	31	32	33	34	35	36	37	38	39	40	41	42	43	44	45	46	47	48	49
Time [s]	0	30.015	60.029	90.044	120.058	150.07	180.085	210.095	240.111	270.124	300.138	330.153	360.18	390.196	420.226	450.256	480.284	510.297	540.321	570.34	600.376	630.385	660.397	690.411	720.424	750.448	780.47	810.494	840.508	870.522	900.554	930.579	960.608	990.618	1020.63	1050.64	1080.66	1110.67	1140.7	1170.72	1200.75	1230.76	1260.79	1290.8	1320.82	1350.83	1380.86	1410.87	1440.89
Temp. [°C]	27.2	27.2	27.3	27.5	27.5	27.6	27.6	27.4	27.4	27.5	27.3	27.2	27.2	27.3	27.4	27.5	27.7	27.8	27.6	27.4	27.2	27.1	27	27.1	27.3	27.4	27.6	27.7	27.7	27.6	27.4	27.4	27.2	27.2	27.2	27.4	27.6	27.8	27.8	27.6	27.4	27.3	27.1	27.1	27.2	27.4	27.7	27.9	27.8
Mean	8609	8403	8640.75	9146.25	8988	9283	9681	9093.25	8663.75	9368	9593.25	9035.75	9294	9715.25	9935.75	9933.25	10001	9802.25	9675.75	9829.25	10313.2	11144.5	10333.8	10612	10884.5	10181.5	10265.8	10114.5	10704.2	10988	10177	10841	11081	10997	10565	10945.8	11465.8	11238.2	10740.8	11379	10890.2	11352.2	11582	11367.8	11646.8	11475.5	11155.8	11656	11852.8
StDev	798.278	879.884	283.014	655.906	660.866	720.862	313.865	497.569	1029.04	285.859	435.128	519.203	707.518	414.088	441.366	766.619	335.291	415.854	791.653	532.624	136.539	999.004	427.592	301.307	488.283	351.888	400.942	1237.21	398.405	538.898	419.593	1055.45	371.479	707.78	776.501	537.297	445.77	490.284	830.228	633.254	450.318	774.54	440.139	591.537	247.663	343.997	570.752	505.118	682.923
1;1	8700	8669	8353	9391	9034	9451	9731	9115	9204	9192	9021	8889	9681	9781	9564	10466	10090	9293	10047	9955	10215	10836	10170	10246	10854	9986	9824	11025	10744	11290	9568	11384	11249	11463	10655	10209	11678	11321	11212	11403	10248	11578	11675	11692	11359	11234	10970	11589	12388
1;2	9625	9442	9024	9689	9592	9720	10054	9553	9784	9753	9838	9405	10046	10244	10002	10714	10294	9744	10581	10382	10514	11410	10964	10859	11491	10702	10427	11320	11041	11419	10259	12059	11512	11740	11514	11168	11954	11849	11593	12253	11151	12241	12104	11953	11624	11873	11811	12311	12480
2;1	8415	7350	8538	9312	9268	9741	9649	9308	7479	9412	10009	9484	8987	9582	10533	9217	10102	10304	8805	9103	10243	9977	10189	10859	10897	9950	10739	9245	10897	11025	10364	9880	10680	10355	9621	11469	10932	11116	9730	11063	11247	10384	11510	11220	11964	11649	10472	11644	11419
2;2	7696	8151	8648	8193	8058	8220	9290	8397	8188	9115	9505	8365	8462	9254	9644	9336	9518	9868	9270	9877	10281	12355	10012	10484	10296	10088	10073	8868	10135	10218	10517	10041	10883	10430	10470	10937	11299	10667	10428	10797	10915	11206	11039	10606	11640	11146	11370	11080	11124
Cycles / Well
FL 1	1	2	3	4	5	6	7	8	9	10	11	12	13	14	15	16	17	18	19	20	21	22	23	24	25	26	27	28	29	30	31	32	33	34	35	36	37	38	39	40	41	42	43	44	45	46	47	48	49
Time [s]	0	30.015	60.029	90.044	120.058	150.07	180.085	210.095	240.111	270.124	300.138	330.153	360.18	390.196	420.226	450.256	480.284	510.297	540.321	570.34	600.376	630.385	660.397	690.411	720.424	750.448	780.47	810.494	840.508	870.522	900.554	930.579	960.608	990.618	1020.63	1050.64	1080.66	1110.67	1140.7	1170.72	1200.75	1230.76	1260.79	1290.8	1320.82	1350.83	1380.86	1410.87	1440.89
Temp. [°C]	27.2	27.2	27.3	27.5	27.5	27.6	27.6	27.4	27.4	27.5	27.3	27.2	27.2	27.3	27.4	27.5	27.7	27.8	27.6	27.4	27.2	27.1	27	27.1	27.3	27.4	27.6	27.7	27.7	27.6	27.4	27.4	27.2	27.2	27.2	27.4	27.6	27.8	27.8	27.6	27.4	27.3	27.1	27.1	27.2	27.4	27.7	27.9	27.8
Mean	7806.25	8256	8202.25	8033.25	8660.25	7926	7981.75	8877.5	7926.75	8486.75	8492.5	8467.75	8411.25	8341.75	8624.5	8963.75	9299	8666	9212.25	9536.25	8990.75	9159.25	9445	9274.75	9094.75	9020.5	9196.5	9422.75	10011	9713	9746.25	9919.5	10428	10107	9774.5	9955.5	10370	10284	10377.2	9944.25	9588.75	10268.2	10262.5	10532.2	10494.8	10845.8	10681.8	10690.8	10418
StDev	1376.74	2742.13	2183.39	2019.94	1619.18	1633.7	2324.16	1082.26	3000.47	1260.36	1411.31	1637.73	1522.91	2026.59	1965.49	2166.83	1115.27	2202.64	1749.11	1923.32	2600.96	2004.03	2001.18	986.626	2186.43	1033.97	1278.82	1115.18	1333.55	2814.81	1984.98	2564.67	2273.13	1322.59	1667.34	991.456	2066.58	2337.99	2434.85	2611.04	1479.49	1443.13	1440.22	2147.95	1921.35	1589.94	2700.72	1245.04	1749.17
1;1	11073	11468	11304	11648	11591	11493	11548	11600	12141	11614	11443	11345	11932	11772	11547	12334	11987	12007	11922	12309	12777	12256	12133	11885	12116	12373	12665	12373	12835	13322	12449	12829	13067	13061	13367	12743	13446	13428	13799	13503	13781	13950	13865	13712	14119	13868	13832	13666	14056
1;2	11452	12144	11857	11895	12107	12053	12089	12156	12695	12516	12503	11978	12588	12376	12358	12565	12516	12470	12558	12827	13295	12843	12563	12652	12947	12779	13199	12715	13186	14163	12997	13807	13883	13367	13874	13414	14557	13945	14556	14568	14491	14875	14626	14583	14869	14920	14810	14322	14521
2;1	9428	6635	8228	8845	9335	9534	7618	10531	6741	10263	10012	9237	10213	8440	8765	8856	10757	8434	9312	9274	8441	9010	8749	11307	8624	11408	11290	10870	11296	8820	9108	8762	9336	11027	10740	11796	10298	9880	9901	9309	12079	12532	12181	10405	11505	12048	9603	12378	11249
2;2	8531	7632	7484	7852	8845	8575	8025	9736	7850	9754	9370	8565	9283	8754	8444	8556	10079	8441	9179	9240	8656	9202	9055	10311	8973	10468	10396	10435	10337	8990	9532	9112	9860	10847	10770	11178	10750	9450	10092	9880	11292	11637	11527	10555	10958	11495	9790	11560	11305
Cycles / Well
FL 0.5	1	2	3	4	5	6	7	8	9	10	11	12	13	14	15	16	17	18	19	20	21	22	23	24	25	26	27	28	29	30	31	32	33	34	35	36	37	38	39	40	41	42	43	44	45	46	47	48	49
Time [s]	0	30.015	60.029	90.044	120.058	150.07	180.085	210.095	240.111	270.124	300.138	330.153	360.18	390.196	420.226	450.256	480.284	510.297	540.321	570.34	600.376	630.385	660.397	690.411	720.424	750.448	780.47	810.494	840.508	870.522	900.554	930.579	960.608	990.618	1020.63	1050.64	1080.66	1110.67	1140.7	1170.72	1200.75	1230.76	1260.79	1290.8	1320.82	1350.83	1380.86	1410.87	1440.89
Temp. [°C]	27.2	27.3	27.3	27.6	27.6	27.6	27.5	27.4	27.5	27.5	27.3	27.2	27.2	27.3	27.4	27.5	27.7	27.8	27.6	27.4	27.3	27.1	27.1	27.2	27.3	27.4	27.7	27.7	27.7	27.6	27.4	27.4	27.3	27.2	27.3	27.4	27.7	27.8	27.8	27.6	27.4	27.3	27.1	27.1	27.2	27.5	27.7	27.9	27.8
Mean	7396	7743	7296.5	7703.25	7484.75	7952.5	7323.25	8001.5	7867.75	7473	7768.75	8120	8467.25	8205.75	8841.25	8745.25	8488.25	8893.5	8915	8831.5	9235	8493.25	8694.75	8962	9167.25	9138.75	9355.25	9091	9130.25	9093	9027.5	9332.75	9711.5	9012.25	9262.25	9888.75	9740.5	10211.2	9796.5	9649.5	10260.2	9464.5	9538	10183.2	10177	10019.5	10427.2	9756.75	9981.5
StDev	1879.04	3028.87	2371.42	1394.81	2392.47	2607.76	1026.41	2337.48	1910.43	1363.88	1708.36	2817.79	2672.34	1598.44	2083.44	2474.92	1307.69	751.855	2225.27	2245.44	2458.38	1422.49	2289.5	1189.19	821.97	1345.48	1806.1	2199.58	976.279	2439.91	1334.56	1449.47	670.957	2389.03	851.21	1776.38	988.728	3711.33	1574.02	1083.89	3005.27	1386.53	1723.11	2681.87	1555.52	1534.55	1291.05	1318.48	1119.94
1;1	11795	11838	11806	11674	12376	11410	11907	11796	12190	12975	12467	12924	12742	12771	13928	13263	12964	13019	13248	14299	13979	14112	14051	14638	14175	14283	14830	14478	14547	15724	15733	16179	14188	15664	15531	15994	15799	17182	16792	15166	16863	16170	17310	17637	16991	17501	17319	17231	17342
1;2	11742	11821	11819	12004	12036	11835	11901	11986	12544	12992	13286	13402	12132	12351	13300	13315	12919	13198	13359	13809	14064	14297	14259	14539	13992	14826	14754	14367	14266	15756	15302	15892	14518	16208	15971	16186	16323	17089	17323	14551	16322	16321	16992	17043	17540	17182	17691	17679	17503
2;1	8765	6128	8184	9996	8538	7017	10424	8049	9232	11263	9868	7727	7985	9825	10188	8517	10991	12926	9264	10951	10481	12528	9720	13295	13451	12730	11741	11202	13427	11414	13489	13423	13946	11590	14951	13458	15176	10209	14913	13583	11020	14246	14551	12737	15829	15737	15759	16055	17191
2;2	8297	7136	7318	9059	7688	7219	9905	7659	8918	10217	10090	9040	7682	9792	9890	9635	10432	11561	9656	9636	9232	11285	10818	12117	12348	11925	11591	10167	12375	11619	13013	13654	12960	12070	14001	12675	14025	11299	13969	12701	11849	13549	13876	12691	14022	14149	14957	14735	15120
Cycles / Well
FL 2	1	2	3	4	5	6	7	8	9	10	11	12	13	14	15	16	17	18	19	20	21	22	23	24	25	26	27	28	29	30	31	32	33	34	35	36	37	38	39	40	41	42	43	44	45	46	47	48	49
Time [s]	0	30.015	60.029	90.044	120.058	150.07	180.085	210.095	240.111	270.124	300.138	330.153	360.18	390.196	420.226	450.256	480.284	510.297	540.321	570.34	600.376	630.385	660.397	690.411	720.424	750.448	780.47	810.494	840.508	870.522	900.554	930.579	960.608	990.618	1020.63	1050.64	1080.66	1110.67	1140.7	1170.72	1200.75	1230.76	1260.79	1290.8	1320.82	1350.83	1380.86	1410.87	1440.89
Temp. [°C]	27.2	27.3	27.3	27.6	27.6	27.6	27.5	27.4	27.5	27.5	27.3	27.2	27.2	27.3	27.4	27.5	27.7	27.8	27.6	27.4	27.3	27.1	27.1	27.2	27.3	27.4	27.7	27.7	27.7	27.6	27.4	27.4	27.3	27.2	27.3	27.4	27.7	27.8	27.8	27.6	27.4	27.3	27.1	27.1	27.2	27.5	27.7	27.9	27.8
Mean	10620	9609.5	10763	9646.5	10128.2	11019.8	9897	10018.2	10201.2	10360.5	11244.5	11329	10098.8	10917.8	11050.2	10561.8	10756	10851	11586	10977.8	11528.8	11084.5	11040	10772.5	11889.2	11954.8	11314.2	11213.2	11002	11600.8	12536.2	12111	12653.2	12807.8	12187	12814.2	11318.2	12546.5	12883.5	11796.8	13198.8	12352	12127.8	12611.8	11811.5	11660.8	12948	12192.2	13302.8
StDev	791.147	370.658	551.963	443.468	477.201	605.802	562.585	431.784	393.125	507.924	395.062	267.789	843.543	477.297	616.521	437.542	417.633	468.567	450.553	446.496	382.234	274.754	457.785	431.947	576.119	342.534	602.418	273.377	362.669	532.151	379.558	445.653	441.811	777.782	485.793	471.764	391.216	534.727	404.319	513.414	378.504	335.443	275.984	564.832	493.528	685.967	355.155	397.12	509.038
1;1	5734	5868	5807	5361	5936	5726	5434	5335	5336	5299	5625	5916	6076	5591	6041	5605	5654	5656	5729	6227	5932	5781	5705	5698	5804	5917	6214	5901	6055	5704	6166	5868	5869	6194	5895	5596	5932	5835	5777	6009	5873	6137	6147	5882	5639	5985	5646	5996	5779
1;2	6628	6684	6478	6386	6872	6767	6142	6139	6264	6225	6495	6542	7042	6566	6925	6603	6514	6461	6548	7022	6758	6293	6822	6334	6645	6590	7201	6512	6842	6680	6953	6739	6756	7262	6790	6498	6851	7037	6463	7004	6714	6838	6766	6771	6466	6730	6469	6686	6471
2;1	4693	6423	5293	6167	6087	5485	6810	5375	6006	5391	6387	6365	5276	6428	6031	5889	6527	5820	5534	7208	6636	6324	6347	6703	7205	6091	6245	6346	6369	5501	6268	6658	6770	5414	6023	6636	6626	6309	6720	6761	6164	6650	6492	7219	6407	5988	6255	6860	6355
2;2	5633	6031	5333	5873	5811	5513	6187	5171	5789	5057	6012	6370	5259	5784	5428	5786	6058	5350	5737	6548	6209	6365	6308	6006	6591	5820	5771	6434	6094	5691	6166	6001	6200	5937	5671	6442	6453	5986	6178	6011	5956	6227	6249	6421	5533	5055	5988	6242	5383
Cycles / Well
C3	1	2	3	4	5	6	7	8	9	10	11	12	13	14	15	16	17	18	19	20	21	22	23	24	25	26	27	28	29	30	31	32	33	34	35	36	37	38	39	40	41	42	43	44	45	46	47	48	49
Time [s]	0	30.015	60.029	90.044	120.058	150.07	180.085	210.095	240.111	270.124	300.138	330.153	360.18	390.196	420.226	450.256	480.284	510.297	540.321	570.34	600.376	630.385	660.397	690.411	720.424	750.448	780.47	810.494	840.508	870.522	900.554	930.579	960.608	990.618	1020.63	1050.64	1080.66	1110.67	1140.7	1170.72	1200.75	1230.76	1260.79	1290.8	1320.82	1350.83	1380.86	1410.87	1440.89
Temp. [°C]	27.2	27.3	27.3	27.5	27.6	27.5	27.5	27.4	27.5	27.5	27.3	27.2	27.2	27.3	27.4	27.5	27.7	27.8	27.6	27.4	27.3	27.1	27.1	27.2	27.3	27.4	27.7	27.7	27.7	27.6	27.4	27.4	27.3	27.2	27.3	27.4	27.7	27.8	27.8	27.6	27.4	27.3	27.1	27.1	27.2	27.5	27.7	27.9	27.8
Mean	-3.5	-4.5	-3.5	-4.25	-3.75	-3.75	-4.25	-4.75	-4	-4	-4	-3.75	-3.75	-4.25	-3.5	-4	-3.75	-4	-4.5	-4.25	-4.75	-4.25	-5	-4	-3.75	-4	-4	-3.5	-4	-3.75	-3.75	-4.25	-3.75	-3.75	-3.75	-3.5	-4	-3.5	-3.5	-3	-3.25	-4	-3.75	-2.75	-3	-3.25	-2.75	-3	-3.5
StDev	0.57735	0.57735	1.29099	0.5	0.5	0.957427	1.25831	0.957427	0	0.816497	0.816497	0.5	0.5	0.5	0.57735	0.816497	0.957427	0.816497	1	0.957427	0.5	0.5	0.816497	1.82574	0.5	0	0.816497	0.57735	0.816497	0.5	0.5	0.957427	0.5	0.957427	0.957427	0.57735	0.816497	0.57735	0.57735	0.816497	0.5	0.816497	0.957427	0.5	0	0.5	0.5	0	0.57735
1;1	-4	-4	-2	-5	-4	-3	-3	-4	-4	-5	-4	-4	-4	-4	-4	-4	-4	-4	-4	-5	-5	-4	-5	-6	-4	-4	-5	-4	-3	-3	-4	-4	-4	-3	-3	-4	-4	-4	-3	-3	-3	-3	-5	-2	-3	-4	-2	-3	-3
1;2	-3	-5	-5	-4	-4	-5	-4	-5	-4	-4	-5	-3	-4	-4	-4	-5	-5	-5	-4	-5	-5	-4	-4	-5	-3	-4	-4	-4	-4	-4	-3	-5	-4	-4	-5	-3	-4	-3	-4	-2	-3	-4	-3	-3	-3	-3	-3	-3	-4
2;1	-4	-4	-4	-4	-3	-4	-4	-6	-4	-3	-4	-4	-4	-5	-3	-3	-3	-4	-6	-3	-5	-5	-5	-2	-4	-4	-4	-3	-5	-4	-4	-5	-4	-5	-4	-4	-3	-3	-3	-3	-3	-4	-3	-3	-3	-3	-3	-3	-4
2;2	-3	-5	-3	-4	-4	-3	-6	-4	-4	-4	-3	-4	-3	-4	-3	-4	-3	-3	-4	-4	-4	-4	-6	-3	-4	-4	-3	-3	-4	-4	-4	-3	-3	-3	-3	-3	-5	-4	-4	-4	-4	-5	-4	-3	-3	-3	-3	-3	-3
Cycles / Well
C4	1	2	3	4	5	6	7	8	9	10	11	12	13	14	15	16	17	18	19	20	21	22	23	24	25	26	27	28	29	30	31	32	33	34	35	36	37	38	39	40	41	42	43	44	45	46	47	48	49
Time [s]	0	30.015	60.029	90.044	120.058	150.07	180.085	210.095	240.111	270.124	300.138	330.153	360.18	390.196	420.226	450.256	480.284	510.297	540.321	570.34	600.376	630.385	660.397	690.411	720.424	750.448	780.47	810.494	840.508	870.522	900.554	930.579	960.608	990.618	1020.63	1050.64	1080.66	1110.67	1140.7	1170.72	1200.75	1230.76	1260.79	1290.8	1320.82	1350.83	1380.86	1410.87	1440.89
Temp. [°C]	27.2	27.3	27.3	27.5	27.6	27.5	27.5	27.4	27.5	27.5	27.3	27.2	27.2	27.3	27.4	27.5	27.7	27.8	27.6	27.4	27.3	27.1	27.1	27.2	27.3	27.4	27.7	27.7	27.7	27.6	27.4	27.4	27.3	27.2	27.3	27.4	27.7	27.8	27.8	27.6	27.4	27.3	27.1	27.1	27.2	27.5	27.7	27.9	27.8
Mean	-4.25	-4	-3.25	-4	-3.75	-4.25	-4	-4.5	-4.25	-4.25	-4.5	-3.75	-4.25	-4	-4.25	-3.5	-4.5	-3.75	-3.5	-3.25	-4.25	-4.5	-4.5	-3.5	-4	-3.75	-3.25	-4.5	-3.75	-4	-4.25	-3.5	-3.5	-3.5	-3.25	-4	-3.25	-3.75	-3.5	-3.25	-3.5	-3.5	-3.75	-3.75	-3.25	-3	-2.75	-3	-3.25
StDev	0.5	0	0.5	0	0.957427	0.5	0.816497	0.57735	2.06155	0.5	0.57735	0.5	0.957427	0	1.25831	0.57735	0.57735	0.5	0.57735	0.957427	0.5	0.57735	0.57735	0.57735	1.41421	0.957427	0.5	1.29099	0.5	0	0.957427	0.57735	0.57735	0.57735	0.957427	0	0.5	0.957427	1.29099	0.5	0.57735	1	0.957427	0.957427	0.5	0.816497	0.5	0	0.957427
1;1	-4	-4	-3	-4	-5	-4	-3	-4	-6	-4	-4	-3	-3	-4	-4	-4	-4	-4	-4	-2	-4	-5	-5	-3	-4	-3	-3	-6	-4	-4	-4	-3	-4	-3	-3	-4	-3	-3	-3	-3	-3	-3	-3	-3	-3	-4	-3	-3	-2
1;2	-4	-4	-3	-4	-3	-4	-4	-5	-2	-4	-4	-4	-5	-4	-6	-3	-4	-4	-3	-3	-4	-4	-4	-4	-2	-5	-4	-4	-4	-4	-5	-4	-3	-4	-2	-4	-3	-4	-2	-3	-3	-3	-5	-4	-3	-3	-3	-3	-4
2;1	-4	-4	-4	-4	-4	-5	-5	-4	-3	-5	-5	-4	-5	-4	-3	-4	-5	-4	-3	-4	-5	-4	-4	-4	-5	-3	-3	-3	-4	-4	-3	-4	-4	-4	-4	-4	-4	-5	-5	-4	-4	-3	-3	-5	-3	-2	-2	-3	-3
2;2	-5	-4	-3	-4	-3	-4	-4	-5	-6	-4	-5	-4	-4	-4	-4	-3	-5	-3	-4	-4	-4	-5	-5	-3	-5	-4	-3	-5	-3	-4	-5	-3	-3	-3	-4	-4	-3	-3	-4	-3	-4	-5	-4	-3	-4	-3	-3	-3	-4
Cycles / Well
C5	1	2	3	4	5	6	7	8	9	10	11	12	13	14	15	16	17	18	19	20	21	22	23	24	25	26	27	28	29	30	31	32	33	34	35	36	37	38	39	40	41	42	43	44	45	46	47	48	49
Time [s]	0	30.015	60.029	90.044	120.058	150.07	180.085	210.095	240.111	270.124	300.138	330.153	360.18	390.196	420.226	450.256	480.284	510.297	540.321	570.34	600.376	630.385	660.397	690.411	720.424	750.448	780.47	810.494	840.508	870.522	900.554	930.579	960.608	990.618	1020.63	1050.64	1080.66	1110.67	1140.7	1170.72	1200.75	1230.76	1260.79	1290.8	1320.82	1350.83	1380.86	1410.87	1440.89
Temp. [°C]	27.2	27.3	27.3	27.5	27.6	27.5	27.5	27.4	27.5	27.5	27.3	27.2	27.2	27.3	27.4	27.5	27.7	27.8	27.6	27.4	27.3	27.1	27.1	27.2	27.3	27.4	27.7	27.7	27.7	27.6	27.4	27.4	27.3	27.2	27.3	27.4	27.7	27.8	27.8	27.6	27.4	27.3	27.1	27.1	27.2	27.5	27.7	27.9	27.8
Mean	-3.5	-3	-3.5	-4	-4.75	-4.25	-4.25	-3.75	-5	-4.75	-4	-4.5	-3.75	-2.75	-4.25	-4	-4.5	-4.5	-4.75	-3.75	-3.75	-4.25	-4.25	-3.75	-4	-4	-3.5	-4.25	-4.5	-4	-4.25	-3.75	-4	-3.5	-3.5	-3.5	-3.25	-3.25	-3.25	-3.75	-3.25	-4	-3.75	-3.25	-3.25	-3.75	-3.75	-3	-3.5
StDev	0.57735	0.816497	0.57735	0.816497	1.5	0.957427	0.5	0.5	0	0.5	1.41421	1	0.5	1.89297	0.5	0.816497	0.57735	0.57735	0.5	0.5	0.957427	0.957427	0.5	0.957427	0	0	1	1.5	0.57735	0.816497	0.957427	0.5	0	0.57735	0.57735	1	0.5	0.5	1.25831	0.5	0.5	0	0.957427	0.957427	0.957427	0.5	0.5	0	1
1;1	-3	-3	-3	-4	-7	-3	-4	-4	-5	-4	-6	-5	-4	0	-4	-4	-5	-4	-5	-3	-3	-5	-4	-3	-4	-4	-3	-3	-5	-4	-5	-3	-4	-4	-4	-4	-3	-3	-5	-3	-3	-4	-3	-4	-4	-4	-3	-3	-3
1;2	-3	-2	-4	-4	-4	-4	-4	-3	-5	-5	-4	-5	-4	-3	-4	-4	-4	-5	-4	-4	-3	-4	-4	-3	-4	-4	-5	-3	-4	-3	-3	-4	-4	-4	-3	-2	-3	-4	-3	-4	-3	-4	-3	-3	-3	-4	-4	-3	-5
2;1	-4	-4	-3	-5	-4	-5	-4	-4	-5	-5	-3	-3	-3	-4	-5	-3	-4	-4	-5	-4	-5	-3	-5	-5	-4	-4	-3	-5	-5	-5	-5	-4	-4	-3	-3	-4	-3	-3	-3	-4	-3	-4	-5	-4	-2	-4	-4	-3	-3
2;2	-4	-3	-4	-3	-4	-5	-5	-4	-5	-5	-3	-5	-4	-4	-4	-5	-5	-5	-5	-4	-4	-5	-4	-4	-4	-4	-3	-6	-4	-4	-4	-4	-4	-3	-4	-4	-4	-3	-2	-4	-4	-4	-4	-2	-4	-3	-4	-3	-3
Cycles / Well
C6	1	2	3	4	5	6	7	8	9	10	11	12	13	14	15	16	17	18	19	20	21	22	23	24	25	26	27	28	29	30	31	32	33	34	35	36	37	38	39	40	41	42	43	44	45	46	47	48	49
Time [s]	0	30.015	60.029	90.044	120.058	150.07	180.085	210.095	240.111	270.124	300.138	330.153	360.18	390.196	420.226	450.256	480.284	510.297	540.321	570.34	600.376	630.385	660.397	690.411	720.424	750.448	780.47	810.494	840.508	870.522	900.554	930.579	960.608	990.618	1020.63	1050.64	1080.66	1110.67	1140.7	1170.72	1200.75	1230.76	1260.79	1290.8	1320.82	1350.83	1380.86	1410.87	1440.89
Temp. [°C]	27.2	27.3	27.3	27.5	27.6	27.5	27.5	27.4	27.5	27.5	27.3	27.2	27.2	27.3	27.4	27.5	27.7	27.8	27.6	27.4	27.3	27.1	27.1	27.2	27.3	27.4	27.7	27.7	27.7	27.6	27.4	27.4	27.3	27.2	27.3	27.4	27.7	27.8	27.8	27.6	27.4	27.3	27.1	27.1	27.2	27.5	27.7	27.9	27.8
Mean	-3.75	-3.75	-4	-4	-4.25	-4	-4.25	-4	-4.75	-4.75	-3.75	-4.25	-3.5	-4	-4	-3.75	-4.25	-3.5	-4.5	-4.5	-4	-3.5	-4.25	-4.25	-4	-4.5	-4.25	-4.5	-3	-4	-4.75	-3.5	-3	-3.5	-4	-3.5	-3.25	-4	-3.5	-3.5	-3.25	-4.25	-3.5	-3.75	-4	-2.75	-3.5	-2.75	-3.25
StDev	0.5	0.5	0.816497	0.816497	0.5	0	0.957427	0.816497	0.5	0.5	0.5	0.5	0.57735	0.816497	0.816497	0.5	0.957427	1.29099	0.57735	0.57735	0.816497	0.57735	0.957427	1.25831	0.816497	0.57735	0.957427	0.57735	0.816497	0.816497	0.957427	0.57735	0.816497	0.57735	0	1.29099	0.5	0.816497	0.57735	0.57735	0.5	0.957427	0.57735	0.957427	1.41421	0.957427	0.57735	1.25831	0.957427
1;1	-3	-4	-3	-4	-4	-4	-5	-4	-5	-5	-4	-5	-3	-5	-4	-4	-5	-4	-5	-5	-4	-4	-5	-6	-5	-5	-5	-5	-3	-4	-5	-3	-4	-3	-4	-3	-3	-4	-3	-4	-3	-5	-4	-3	-3	-2	-4	-3	-2
1;2	-4	-4	-5	-5	-5	-4	-3	-3	-5	-4	-4	-4	-4	-4	-3	-3	-5	-2	-4	-4	-5	-4	-4	-4	-4	-4	-4	-4	-2	-3	-4	-3	-3	-3	-4	-4	-3	-4	-3	-3	-3	-3	-3	-3	-6	-3	-3	-1	-3
2;1	-4	-3	-4	-3	-4	-4	-5	-5	-5	-5	-4	-4	-3	-3	-5	-4	-3	-5	-5	-5	-4	-3	-5	-4	-3	-5	-5	-4	-3	-4	-6	-4	-2	-4	-4	-2	-3	-3	-4	-4	-4	-5	-4	-4	-3	-4	-3	-3	-4
2;2	-4	-4	-4	-4	-4	-4	-4	-4	-4	-5	-3	-4	-4	-4	-4	-4	-4	-3	-4	-4	-3	-3	-3	-3	-4	-4	-3	-5	-4	-5	-4	-4	-3	-4	-4	-5	-4	-5	-4	-3	-3	-4	-3	-5	-4	-2	-4	-4	-4
Cycles / Well
C7	1	2	3	4	5	6	7	8	9	10	11	12	13	14	15	16	17	18	19	20	21	22	23	24	25	26	27	28	29	30	31	32	33	34	35	36	37	38	39	40	41	42	43	44	45	46	47	48	49
Time [s]	0	30.015	60.029	90.044	120.058	150.07	180.085	210.095	240.111	270.124	300.138	330.153	360.18	390.196	420.226	450.256	480.284	510.297	540.321	570.34	600.376	630.385	660.397	690.411	720.424	750.448	780.47	810.494	840.508	870.522	900.554	930.579	960.608	990.618	1020.63	1050.64	1080.66	1110.67	1140.7	1170.72	1200.75	1230.76	1260.79	1290.8	1320.82	1350.83	1380.86	1410.87	1440.89
Temp. [°C]	27.2	27.3	27.3	27.5	27.6	27.5	27.5	27.4	27.5	27.5	27.3	27.2	27.2	27.3	27.4	27.5	27.7	27.8	27.6	27.4	27.3	27.1	27.1	27.2	27.3	27.4	27.7	27.7	27.7	27.6	27.4	27.4	27.3	27.2	27.3	27.4	27.7	27.8	27.7	27.6	27.4	27.3	27.1	27.1	27.3	27.5	27.8	27.9	27.8
Mean	5142.75	5383	5189.5	5355.25	5257	5496.5	5551.25	5158	4876.75	5255.25	5387.5	5558.25	5738.25	5409.5	5474.75	6120.75	5287.25	5066.5	5483	5677.5	5433	5882.75	5662	5585	5588	6141.25	5649.5	5693.25	5536.75	5456.5	5395.25	5864.75	5527.75	5973	5788.75	5831.5	5284	5900.75	6083.5	5808.25	6138	6145.75	5811.75	6318.25	6393.5	5866.5	5933	6053.75	6181.25
StDev	364.191	616.781	624.545	531.144	261.926	540.168	371.246	325.685	288.746	472.893	593.095	524.112	625.609	415.798	360.369	807.94	453.309	447.13	584.354	544.433	527.445	529.038	343.058	516.424	600.254	572.424	522.718	341.032	347.164	356.076	467.517	480.498	376.445	361.51	251.334	452.176	273.58	592	465.774	429.871	440.528	426.622	454.06	628.225	713.158	436.774	272.156	274.627	525.491
1;1	4783	5037	4674	4861	5019	4995	5085	4739	4721	5059	5174	5096	5131	4909	5016	5216	4871	5145	5155	5287	5296	5296	5248	5429	4956	5515	5345	5245	5453	5373	5299	5569	5498	5648	5665	5263	5257	5263	5777	5733	5661	5869	5775	5627	5738	5400	5972	5916	6023
1;2	5631	5803	5277	5454	5585	5711	5674	5499	5302	5917	5736	5779	5715	5436	5743	5828	5424	5654	5791	5794	5970	6095	5805	5909	5723	6282	6138	5661	5668	5981	5842	5866	6052	6118	6150	5772	5654	5704	6215	6155	6091	6226	6464	6268	6179	5982	6303	6444	6550
2;1	4974	5995	6038	6060	5349	6158	5970	5305	4808	5230	5983	6195	6604	5925	5781	6309	5866	4849	6134	6400	5706	6506	6047	6074	6356	6860	6043	6059	5923	5259	5659	6542	5164	6416	5582	6357	4994	6677	6683	6115	6728	6715	5470	7152	7408	6416	5737	6035	6644
2;2	5183	4697	4769	5046	5075	5122	5476	5089	4676	4815	4657	5163	5503	5368	5359	7130	4988	4618	4852	5229	4760	5634	5548	4928	5317	5908	5072	5808	5103	5213	4781	5482	5397	5710	5758	5934	5231	5959	5659	5230	6072	5773	5538	6226	6249	5668	5720	5820	5508
Cycles / Well
C8	1	2	3	4	5	6	7	8	9	10	11	12	13	14	15	16	17	18	19	20	21	22	23	24	25	26	27	28	29	30	31	32	33	34	35	36	37	38	39	40	41	42	43	44	45	46	47	48	49
Time [s]	0	30.015	60.029	90.044	120.058	150.07	180.085	210.095	240.111	270.124	300.138	330.153	360.18	390.196	420.226	450.256	480.284	510.297	540.321	570.34	600.376	630.385	660.397	690.411	720.424	750.448	780.47	810.494	840.508	870.522	900.554	930.579	960.608	990.618	1020.63	1050.64	1080.66	1110.67	1140.7	1170.72	1200.75	1230.76	1260.79	1290.8	1320.82	1350.83	1380.86	1410.87	1440.89
Temp. [°C]	27.2	27.3	27.3	27.5	27.6	27.5	27.5	27.4	27.5	27.5	27.3	27.2	27.2	27.3	27.4	27.5	27.7	27.8	27.6	27.4	27.3	27.1	27.1	27.2	27.3	27.4	27.7	27.7	27.7	27.6	27.4	27.4	27.3	27.2	27.3	27.4	27.7	27.8	27.7	27.6	27.4	27.3	27.1	27.1	27.3	27.5	27.8	27.9	27.8
Mean	6491.5	6696	6624.5	6330.25	6685	6315.5	6479.75	6010.25	6299.75	6122.25	6554	6688.5	6727.25	6758.75	6555.75	7046.5	6676	6481	6902	7031.25	6612.75	6662.25	7170.25	7163.5	7102.5	6897.5	6988	6937	7121.25	6759.25	6322.25	6587.5	6978.25	7098.5	7011.25	7133.5	7305.5	7283	7276.25	6950.25	6978.5	7283.5	7279.75	7377.5	7365	7244	7444.75	6915.75	7071.5
StDev	532.223	624.687	540.978	842.865	436.607	489.048	407.868	699.688	535.868	543.402	671.098	509.325	565.254	492.147	467.316	573.982	779.422	808.057	603.35	442.785	724.628	651.223	473.523	547.812	469.647	474.646	671.322	696.431	492.539	607.674	480.512	534.324	431.533	495.147	480.927	431.441	420.863	396.477	483.251	409.595	673.865	574.375	460.621	293.368	493.419	530.438	389.202	499.751	720.091
1;1	5986	6045	6028	6032	6285	6166	6210	5968	6027	5829	6449	6277	6609	6256	6300	6401	6653	6606	6676	6454	6612	6667	6638	6436	6754	6411	6745	6782	6837	6719	6058	6659	6399	6940	6717	6957	6935	6974	7039	6372	7102	7113	6608	6948	6692	6720	6928	6756	7208
1;2	7167	7286	6808	7309	7083	7027	7082	6932	6983	6927	7372	7115	7344	7268	7120	7142	7671	7576	7645	7302	7545	7572	7460	7731	7601	7151	7928	7932	7853	7601	7006	7303	7187	7783	7601	7729	7884	7739	7897	7335	7877	8025	7505	7514	7553	7811	7870	7590	8026
2;1	6655	7172	7280	6643	7042	5910	6249	5910	6438	5763	6654	7143	6947	7083	6736	7775	6614	5874	7065	7444	6516	6090	7663	7378	7402	7431	6928	6307	6822	6163	6296	6072	7399	7063	7192	7130	7064	7490	7389	7014	6561	7350	7635	7602	7857	7574	7525	6397	6402
2;2	6158	6281	6382	5337	6330	6159	6378	5231	5751	5970	5741	6219	6009	6428	6067	6868	5766	5868	6222	6925	5778	6320	6920	7109	6653	6597	6351	6727	6973	6554	5929	6316	6928	6608	6535	6718	7339	6929	6780	7080	6374	6646	7371	7446	7358	6871	7456	6920	6650
Cycles / Well
C9	1	2	3	4	5	6	7	8	9	10	11	12	13	14	15	16	17	18	19	20	21	22	23	24	25	26	27	28	29	30	31	32	33	34	35	36	37	38	39	40	41	42	43	44	45	46	47	48	49
Time [s]	0	30.015	60.029	90.044	120.058	150.07	180.085	210.095	240.111	270.124	300.138	330.153	360.18	390.196	420.226	450.256	480.284	510.297	540.321	570.34	600.376	630.385	660.397	690.411	720.424	750.448	780.47	810.494	840.508	870.522	900.554	930.579	960.608	990.618	1020.63	1050.64	1080.66	1110.67	1140.7	1170.72	1200.75	1230.76	1260.79	1290.8	1320.82	1350.83	1380.86	1410.87	1440.89
Temp. [°C]	27.2	27.3	27.3	27.5	27.6	27.5	27.5	27.4	27.5	27.5	27.3	27.2	27.2	27.3	27.4	27.5	27.7	27.8	27.6	27.4	27.3	27.1	27.1	27.2	27.3	27.4	27.7	27.7	27.7	27.6	27.4	27.4	27.3	27.2	27.3	27.4	27.7	27.8	27.7	27.6	27.4	27.3	27.1	27.1	27.3	27.5	27.8	27.9	27.8
Mean	6979.5	6693	6456.75	7120.25	7017.25	6850.75	6746.25	6638.25	6314.5	6604.25	6871	7479.25	7015.5	6748.5	7294.75	7070.75	7143.75	7397.75	7621	7440.75	6891.25	6898	6993.25	6788.5	7192.25	7327.5	7234.75	7626.5	7324.5	7532.75	7246.75	7762	7580.25	7741.25	7363.25	8104	7882.75	7537.5	7966.75	7215.5	8127	7522	8044.25	7428.5	8095.75	7653.25	8320.5	7532.75	7386.5
StDev	798.086	917.344	782.799	639.08	590.172	769.113	648.682	453.201	1111.75	954.949	954.417	583.047	879.467	1023.41	642.865	694.132	736.302	641.808	638.544	630.587	943.387	752.757	615.853	707.753	450.259	568.524	861.167	446.805	360.55	656.094	973.221	496.953	707.015	632.25	664.313	417.362	458.453	793.663	578.448	650.757	546.414	612.577	464.43	655.55	520.136	803.871	457.381	589.046	632.923
1;1	6179	6613	6418	6475	6259	6639	6440	6040	6593	6672	6819	6888	7044	7052	6490	7047	6958	7068	7231	6854	7074	6976	7019	6924	6754	6941	7205	7158	7034	7321	7445	7116	7574	7726	7296	7542	7291	7553	7649	7246	7688	7102	7442	7421	7454	7856	7811	7434	7284
1;2	8028	8013	7572	7714	7507	7951	7365	7142	7765	7838	8067	7995	8057	7989	7533	8002	8064	8245	8263	7951	8142	7934	7845	7707	7465	7910	8450	7941	7717	8292	8544	7894	8463	8637	8209	8363	8197	8642	8691	8101	8883	8232	8283	8356	8175	8704	8683	8333	8261
2;1	7120	6014	5836	7623	7463	6656	7197	6690	5324	6379	6867	7965	7056	6376	8011	6905	7264	7510	8055	8020	6025	6336	6670	6468	7680	7710	6493	8070	7544	7769	6522	8314	7552	7368	7362	8472	8289	6832	8148	6576	8170	7826	8510	6915	8720	7089	8730	7451	6747
2;2	6591	6132	6001	6669	6840	6157	5983	6681	5576	5528	5731	7069	5905	5577	7145	6329	6289	6768	6935	6938	6324	6346	6439	6055	6870	6749	6791	7337	7003	6749	6476	7724	6732	7234	6586	8039	7754	7123	7379	6939	7767	6928	7942	7022	8034	6964	8058	6913	7254
Cycles / Well
C10	1	2	3	4	5	6	7	8	9	10	11	12	13	14	15	16	17	18	19	20	21	22	23	24	25	26	27	28	29	30	31	32	33	34	35	36	37	38	39	40	41	42	43	44	45	46	47	48	49
Time [s]	0	30.015	60.029	90.044	120.058	150.07	180.085	210.095	240.111	270.124	300.138	330.153	360.18	390.196	420.226	450.256	480.284	510.297	540.321	570.34	600.376	630.385	660.397	690.411	720.424	750.448	780.47	810.494	840.508	870.522	900.554	930.579	960.608	990.618	1020.63	1050.64	1080.66	1110.67	1140.7	1170.72	1200.75	1230.76	1260.79	1290.8	1320.82	1350.83	1380.86	1410.87	1440.89
Temp. [°C]	27.2	27.3	27.3	27.5	27.6	27.5	27.5	27.4	27.5	27.5	27.3	27.2	27.2	27.3	27.4	27.5	27.7	27.8	27.6	27.4	27.3	27.1	27.1	27.2	27.3	27.4	27.7	27.7	27.7	27.6	27.4	27.4	27.3	27.2	27.3	27.4	27.7	27.8	27.7	27.6	27.4	27.3	27.1	27.1	27.3	27.5	27.8	27.9	27.8
Mean	6320.5	6191.75	6623.25	6780	6101	6008.5	6218	6979	6191	6764.5	6943.25	6448.75	6786.5	6556.5	6833.75	7402.5	7538.75	7345	7224.5	7376	6653	7313.75	7370.75	6749	6887	6934	6585	7710	7156	6738.5	7954.5	7164.25	8358.5	7674.5	8112.25	7170.75	8323.25	7800.25	7521.5	7525.75	7805.25	7205	8159.75	7515.5	8391.5	7678.75	8443.75	7560.75	8432.5
StDev	917.149	594.141	737.007	862.886	833.279	719.089	703.162	875.886	1305.76	711.987	691.907	864.276	968.343	766.598	885.039	897.385	857.832	834.255	944.434	869.792	1305.92	842.519	954.954	829.441	982.817	753.235	439.805	868.622	866.447	813.409	746.301	1001.59	826.054	572.013	765.997	723.622	715.975	633.396	438.072	739.805	682.722	851.079	845.583	492.28	1011.89	1007.13	870.288	744.009	617.279
1;1	6320	5685	5914	5778	6024	5517	5747	6048	6282	6207	6117	6362	6680	6335	6031	6506	6637	6431	6136	6366	6791	6467	6164	6439	6869	6167	6298	7045	7236	6595	7176	7319	7385	7311	7328	6777	7493	7158	7100	6965	7166	7039	7366	7109	7230	7862	7459	6922	8059
1;2	7534	7044	7030	7143	7302	7044	7254	7462	7900	7798	7261	7697	8186	7691	7145	7840	8323	7971	7401	7920	8404	7928	7643	7701	8241	7605	7101	8118	8320	7924	8041	8450	8866	8209	8763	7920	8802	8534	8129	8019	8224	8452	8465	8225	8602	9028	8448	8352	9331
2;1	5317	5929	7451	7768	5578	5525	5816	7945	4759	6646	7709	5849	6200	6029	7942	8443	8219	8129	8403	8259	5357	8140	8458	7082	6512	7556	6791	8739	6776	6307	8940	6828	9197	8113	8776	7622	9027	8107	7505	8295	8544	6609	9211	7285	9650	6998	9575	8039	8341
2;2	6111	6109	6098	6431	5500	5948	6055	6461	5823	6407	6686	5887	6080	6171	6217	6821	6976	6849	6958	6959	6060	6720	7218	5774	5926	6408	6150	6938	6292	6128	7661	6060	7986	7065	7582	6364	7971	7402	7352	6824	7287	6720	7597	7443	8084	6827	8293	6930	7999
Cycles / Well
C11	1	2	3	4	5	6	7	8	9	10	11	12	13	14	15	16	17	18	19	20	21	22	23	24	25	26	27	28	29	30	31	32	33	34	35	36	37	38	39	40	41	42	43	44	45	46	47	48	49
Time [s]	0	30.015	60.029	90.044	120.058	150.07	180.085	210.095	240.111	270.124	300.138	330.153	360.18	390.196	420.226	450.256	480.284	510.297	540.321	570.34	600.376	630.385	660.397	690.411	720.424	750.448	780.47	810.494	840.508	870.522	900.554	930.579	960.608	990.618	1020.63	1050.64	1080.66	1110.67	1140.7	1170.72	1200.75	1230.76	1260.79	1290.8	1320.82	1350.83	1380.86	1410.87	1440.89
Temp. [°C]	27.2	27.3	27.3	27.5	27.6	27.5	27.5	27.4	27.5	27.5	27.3	27.2	27.2	27.3	27.4	27.5	27.7	27.8	27.6	27.4	27.3	27.1	27.1	27.2	27.3	27.4	27.7	27.7	27.7	27.6	27.4	27.4	27.3	27.2	27.3	27.4	27.7	27.8	27.7	27.6	27.4	27.3	27.1	27.1	27.3	27.5	27.8	27.9	27.8
Mean	8253.25	8635	8155.75	8944.25	9118.5	8273.75	8436	8908	8504.75	9480	9443	9609.25	8568.25	9832	9068	9309	9024.5	8724.5	9248.25	9978	8957.5	9493.75	9379.25	9304.5	9772.5	10428.2	9853.25	9370.75	10225.8	10126.2	10672.8	10653.2	10647.2	10526.5	10715	10368.8	9947.5	10203.8	10881.8	11227.2	10470	10500.2	10521.2	10754	11234	11260.8	11254	10344	10273.5
StDev	1681.99	1008.34	1429.88	962.075	843.839	1040.14	1714.75	936.354	1859.9	649.93	796.146	596.984	1785.33	861.882	1350.89	1091.62	1230.78	1069.14	779.877	628.386	2002.72	1042.49	1113.51	1641.3	1218.18	691.49	1141.71	862.963	998.677	603.99	575.509	524.955	639.345	741.505	625.115	867.46	1015.53	1027.42	571.797	717.774	762.016	1259.87	1334.93	820.247	641.899	663.145	566.954	1272.16	1533.18
1;1	8411	8210	8392	8571	8247	8020	8775	8418	8916	8853	9218	8888	9157	9114	9421	9195	9201	8821	9137	9455	9643	9453	9422	9702	9890	9807	10081	9132	10217	9517	10225	10038	9801	9559	10206	10292	10058	10165	10250	10603	10207	10688	10738	10544	10829	10337	10730	10423	10617
1;2	10507	9918	10073	10078	9923	9802	10722	10115	10961	10295	10484	10222	10827	10980	10747	10822	10633	10079	10354	10810	11468	10977	10939	11430	11429	11260	11356	10475	11625	10852	11468	11310	11136	11296	11578	11529	11280	11606	11573	12203	11521	12200	12257	11950	12165	11889	12044	12068	12239
2;1	6560	8860	6875	9293	9755	7507	7256	9131	7250	9696	9501	9953	7317	10006	8535	8993	8540	8515	8533	10116	7636	8868	8555	8377	8640	10732	9215	9478	9347	10376	10723	10722	11148	10851	10768	9428	9590	9155	11078	11318	9717	9389	9981	10431	11154	11526	11244	9797	9569
2;2	7535	7552	7283	7835	8549	7766	6991	7968	6892	9076	8569	9374	6972	9228	7569	8226	7724	7483	8969	9531	7083	8677	8601	7709	9131	9914	8761	8398	9714	9760	10275	10543	10504	10400	10308	10226	8862	9889	10626	10785	10435	9724	9109	10091	10788	11291	10998	9088	8669
Cycles / Well
C12	1	2	3	4	5	6	7	8	9	10	11	12	13	14	15	16	17	18	19	20	21	22	23	24	25	26	27	28	29	30	31	32	33	34	35	36	37	38	39	40	41	42	43	44	45	46	47	48	49
Time [s]	0	30.015	60.029	90.044	120.058	150.07	180.085	210.095	240.111	270.124	300.138	330.153	360.18	390.196	420.226	450.256	480.284	510.297	540.321	570.34	600.376	630.385	660.397	690.411	720.424	750.448	780.47	810.494	840.508	870.522	900.554	930.579	960.608	990.618	1020.63	1050.64	1080.66	1110.67	1140.7	1170.72	1200.75	1230.76	1260.79	1290.8	1320.82	1350.83	1380.86	1410.87	1440.89
Temp. [°C]	27.2	27.3	27.3	27.5	27.6	27.5	27.5	27.4	27.5	27.5	27.3	27.2	27.2	27.3	27.4	27.5	27.7	27.8	27.6	27.4	27.3	27.1	27.1	27.2	27.3	27.4	27.7	27.7	27.7	27.6	27.4	27.4	27.3	27.2	27.3	27.4	27.7	27.8	27.7	27.6	27.4	27.3	27.1	27.1	27.3	27.5	27.8	27.9	27.8
Mean	8280.75	8901.25	8544.25	8706.25	9405	9815	9401.75	8653.25	9697.25	9695.5	9295.5	9947.5	9071.5	9635.25	9100.25	9737.75	10241.5	9651	9848.25	10467.5	10134.5	10455.2	10696.8	9838.5	10666	9993.75	10281.5	10498.2	10523.2	11539.5	10248.5	11132.2	11466.5	11266.8	11249.8	11410.8	11324.2	11716.2	10632.5	11677.5	11813.2	11455	10928.2	11789	11349.2	11127.5	11851.5	11289.2	10837
StDev	2211.43	1291.71	1671.21	950.658	1035.36	945.035	1312.04	1846.42	976.873	865.429	1522.21	826.422	2005.6	844.818	1659.16	1189.69	787.748	1537.61	1142	765.061	1422.16	753.93	759.662	1662.32	763.643	900.916	846.637	1408.92	813.863	1440.12	1567.57	757.298	855.081	725.5	761.991	756.571	1224.64	818.68	1334.03	823.308	735.472	826.987	1803.75	1338.83	1330.93	1571.06	790.925	1788.46	1940.88
1;1	8766	8550	8749	7889	8243	9360	9284	9371	9033	8701	9377	9563	9781	8996	9470	9522	9466	9807	9864	9694	9915	9528	9893	10006	9994	9655	9818	10725	9992	9953	10716	10169	10410	10650	10275	10511	11041	10907	10675	10981	11011	10928	11454	11784	11316	11483	11190	11585	11209
1;2	11012	10813	10801	10031	10291	11178	11287	10936	11044	10580	11324	11050	11586	10879	11246	11470	11242	11710	11417	11172	12159	11160	11557	12065	11742	11262	11331	12334	11677	11881	12245	11860	12158	12317	12032	12302	13090	12838	12416	12752	12710	12680	13220	13676	13216	13150	12911	13653	13423
2;1	5723	8051	6986	8735	10265	9679	8649	7144	9789	10235	8790	10051	7608	9371	8263	8823	10471	8977	8743	11076	9614	10969	11083	9110	10635	9155	10564	9918	9912	10976	9273	11593	12165	11079	11630	11653	10901	11716	10214	11890	12058	10984	9882	10999	10704	10363	11997	10398	9582
2;2	7622	8191	7641	8170	8821	9043	8387	7162	8923	9266	7691	9126	7311	9295	7422	9136	9787	8110	9369	9928	8850	10164	10254	8173	10293	9903	9413	9016	10512	13348	8760	10907	11133	11021	11062	11177	10265	11404	9225	11087	11474	11228	9157	10697	10161	9514	11308	9521	9134
Cycles / Well
D1	1	2	3	4	5	6	7	8	9	10	11	12	13	14	15	16	17	18	19	20	21	22	23	24	25	26	27	28	29	30	31	32	33	34	35	36	37	38	39	40	41	42	43	44	45	46	47	48	49
Time [s]	0	30.015	60.029	90.044	120.058	150.07	180.085	210.095	240.111	270.124	300.138	330.153	360.18	390.196	420.226	450.256	480.284	510.297	540.321	570.34	600.376	630.385	660.397	690.411	720.424	750.448	780.47	810.494	840.508	870.522	900.554	930.579	960.608	990.618	1020.63	1050.64	1080.66	1110.67	1140.7	1170.72	1200.75	1230.76	1260.79	1290.8	1320.82	1350.83	1380.86	1410.87	1440.89
Temp. [°C]	27.2	27.2	27.3	27.6	27.6	27.5	27.5	27.4	27.5	27.5	27.3	27.2	27.2	27.3	27.4	27.5	27.8	27.8	27.5	27.3	27.3	27	27.1	27.2	27.4	27.5	27.7	27.7	27.7	27.5	27.4	27.4	27.3	27.2	27.3	27.4	27.8	27.8	27.7	27.5	27.4	27.2	27.1	27.2	27.3	27.5	27.8	27.9	27.8
Mean	4928	4634.5	4838.5	4916.5	5160	4546	4943	4863.25	4906.75	4839.25	4950	4835.5	4893.75	5254.5	4783.75	4710.5	5377.75	5347.25	4928.5	4924.25	4738	4791	4933.25	5023.75	5146.5	5076.75	5125.75	4764.5	4872.25	4939.75	4925.5	4853.25	4836	5250.75	4927.25	5212.75	4976	4941.25	5406	5102.5	5145	4896	4917.75	5596	5038.75	5112.75	5041.75	5017.5	5234.5
StDev	180.257	509.062	134.088	162.564	318.395	473.774	340.542	405.696	329.012	342.662	595.612	229.013	279.875	309.462	227.594	246.804	237.024	362.413	354.894	323.668	300.834	610.539	409.537	303.814	441.649	148.697	585.046	149.587	541.717	272.911	216.656	429.401	162.651	288.57	779.973	416.004	392.922	586.193	716.639	432.613	311.967	270.056	185.947	490.916	249.189	523.585	266.568	159.22	668.099
1;1	5143	5279	5014	5041	5113	4932	4911	5350	5338	5302	5786	5049	5096	5499	4993	4948	5644	5579	5207	5157	4952	5479	5014	5473	5012	5169	5682	4629	5274	5175	5158	5380	5018	5470	5836	5704	5550	5770	5314	5740	5342	5188	5185	5857	5301	5306	5433	5194	5198
1;2	4950	4800	4754	4913	4996	4970	4583	4830	4966	4676	4847	4539	4535	5362	4488	4437	5419	5197	5160	4631	4316	5116	5473	4914	4756	5235	5571	4849	5396	4560	5040	5024	4639	4974	5319	5357	4666	4942	4499	4858	4711	4935	4756	6131	5156	4684	4876	4912	6189
2;1	4703	4172	4716	4688	5621	4050	5404	4360	4575	4507	4376	4978	5135	5356	4726	4569	5380	5703	4915	5248	4956	4399	4543	4906	5781	4978	4719	4932	4500	5094	4834	4545	4783	5528	4285	5061	4881	4525	6230	5001	5399	4927	4848	5359	4975	5766	4989	5107	4724
2;2	4916	4287	4870	5024	4910	4232	4874	4913	4748	4872	4791	4776	4809	4801	4928	4888	5068	4910	4432	4661	4728	4170	4703	4802	5037	4925	4531	4648	4319	4930	4670	4464	4904	5031	4269	4729	4807	4528	5581	4811	5128	4534	4882	5037	4723	4695	4869	4857	4827
Cycles / Well
D2	1	2	3	4	5	6	7	8	9	10	11	12	13	14	15	16	17	18	19	20	21	22	23	24	25	26	27	28	29	30	31	32	33	34	35	36	37	38	39	40	41	42	43	44	45	46	47	48	49
Time [s]	0	30.015	60.029	90.044	120.058	150.07	180.085	210.095	240.111	270.124	300.138	330.153	360.18	390.196	420.226	450.256	480.284	510.297	540.321	570.34	600.376	630.385	660.397	690.411	720.424	750.448	780.47	810.494	840.508	870.522	900.554	930.579	960.608	990.618	1020.63	1050.64	1080.66	1110.67	1140.7	1170.72	1200.75	1230.76	1260.79	1290.8	1320.82	1350.83	1380.86	1410.87	1440.89
Temp. [°C]	27.2	27.2	27.3	27.6	27.6	27.5	27.5	27.4	27.5	27.5	27.3	27.2	27.2	27.3	27.4	27.5	27.8	27.8	27.5	27.3	27.3	27	27.1	27.2	27.4	27.5	27.7	27.7	27.7	27.5	27.4	27.3	27.3	27.2	27.3	27.4	27.8	27.8	27.7	27.5	27.4	27.3	27.1	27.1	27.3	27.5	27.8	27.9	27.8
Mean	4818.75	4896.75	4702.75	4784.25	4595.5	4815.75	4932.75	5028	4904	4939	4801.5	4850.25	4860.5	4698.75	4790	5008	4702	4943.25	4813.5	5035.25	5165.25	5186.5	4977.25	4987.75	5050	5080.5	5683.5	4930.75	5189	5232.25	5268.75	5172.5	4883.75	5057	4855.25	5279.5	5000	4961	4868.5	4857	5008	5787.5	4919.75	5040	4949.25	5297.25	4983.75	5108.25	5322.25
StDev	254.889	229.24	231.529	189.472	378.789	312.641	484.717	287.707	402.24	326.764	306.69	431.573	279.363	412.333	180.568	381.46	338.95	587.095	368.096	213.966	364.953	305.633	684.153	608.32	752.012	405.461	258.553	461.143	531.987	322.629	650.465	140.827	95.4127	218.753	250.236	226.357	489.545	360.789	515.16	454.353	318.339	466.482	358.017	859.258	389.154	448.07	523.424	430.134	1029.44
1;1	4889	5067	4815	4771	4966	5116	5513	5423	5368	5344	4950	5453	5273	5182	4879	5564	5123	5594	4960	5112	5559	5405	5718	5730	5744	5426	5826	5074	5339	5235	6039	5014	5025	5204	5122	5164	5706	5345	5500	5318	5317	5510	5452	5769	5396	5667	5428	5741	5933
1;2	4995	5013	4742	4817	4878	4962	5043	5060	4982	5008	4623	4708	4775	4897	4559	4874	4788	5259	5258	5041	5265	5083	5380	5210	5657	5422	5507	5470	5863	5184	5575	5283	4815	5079	4940	5365	4955	5180	5016	5175	5161	5470	4778	5796	5058	5192	5317	4909	6454
2;1	4442	4946	4367	4544	4260	4390	4345	4807	4391	4842	5154	4434	4737	4408	4976	4898	4574	4608	4598	5247	5156	5457	4546	4356	4409	4840	5973	4806	4905	5648	4768	5299	4846	5204	4834	5552	4674	4578	4669	4434	4975	5699	4675	4366	4461	5623	4920	4789	4391
2;2	4949	4561	4887	5005	4278	4795	4830	4822	4875	4562	4479	4806	4657	4308	4746	4696	4323	4312	4438	4741	4681	4801	4265	4655	4390	4634	5428	4373	4649	4862	4693	5094	4849	4741	4525	5037	4665	4741	4289	4501	4579	6471	4774	4229	4882	4707	4270	4994	4511
Cycles / Well
D3	1	2	3	4	5	6	7	8	9	10	11	12	13	14	15	16	17	18	19	20	21	22	23	24	25	26	27	28	29	30	31	32	33	34	35	36	37	38	39	40	41	42	43	44	45	46	47	48	49
Time [s]	0	30.015	60.029	90.044	120.058	150.07	180.085	210.095	240.111	270.124	300.138	330.153	360.18	390.196	420.226	450.256	480.284	510.297	540.321	570.34	600.376	630.385	660.397	690.411	720.424	750.448	780.47	810.494	840.508	870.522	900.554	930.579	960.608	990.618	1020.63	1050.64	1080.66	1110.67	1140.7	1170.72	1200.75	1230.76	1260.79	1290.8	1320.82	1350.83	1380.86	1410.87	1440.89
Temp. [°C]	27.2	27.2	27.3	27.6	27.6	27.5	27.5	27.4	27.5	27.5	27.3	27.2	27.2	27.3	27.4	27.5	27.8	27.8	27.5	27.3	27.3	27	27.1	27.2	27.4	27.5	27.7	27.7	27.7	27.5	27.4	27.3	27.3	27.2	27.3	27.4	27.8	27.8	27.7	27.5	27.4	27.3	27.1	27.1	27.3	27.5	27.8	27.9	27.8
Mean	-4	-4	-3.75	-4.25	-4	-4.25	-4	-3.75	-4.75	-3.75	-4	-4.25	-3.75	-4	-4.5	-4.25	-4.25	-4.25	-4.5	-4	-4.25	-4.5	-3.5	-3.75	-3.25	-3.25	-3.25	-3.5	-3.75	-3.75	-5	-3.25	-3.5	-3	-3	-3	-3.75	-3.5	-3.5	-3.5	-2.75	-3.5	-3.25	-3	-3	-2.75	-3	-3.25	-2.5
StDev	0.816497	0	0.5	0.5	0	0.5	0	0.5	0.5	0.957427	0.816497	0.5	0.5	0.816497	1.29099	0.5	0.5	0.5	1	0	1.25831	1.73205	0.57735	0.5	0.5	1.25831	0.5	0.57735	0.957427	0.957427	0.816497	0.957427	0.57735	0.816497	0.816497	0	0.957427	0.57735	1.29099	1.29099	0.5	1	0.5	0	0	0.5	0	1.25831	0.57735
1;1	-3	-4	-4	-5	-4	-5	-4	-4	-5	-5	-4	-5	-3	-3	-3	-4	-4	-4	-4	-4	-3	-3	-3	-4	-3	-3	-3	-4	-4	-3	-5	-3	-3	-3	-4	-3	-5	-3	-2	-3	-2	-3	-3	-3	-3	-3	-3	-3	-3
1;2	-5	-4	-4	-4	-4	-4	-4	-3	-5	-3	-3	-4	-4	-4	-5	-5	-4	-4	-6	-4	-4	-7	-4	-3	-4	-3	-4	-3	-3	-4	-5	-4	-4	-3	-3	-3	-3	-4	-4	-5	-3	-5	-4	-3	-3	-3	-3	-3	-2
2;1	-4	-4	-4	-4	-4	-4	-4	-4	-4	-4	-5	-4	-4	-5	-6	-4	-5	-5	-4	-4	-4	-4	-4	-4	-3	-5	-3	-4	-5	-5	-6	-2	-3	-4	-3	-3	-4	-4	-3	-4	-3	-3	-3	-3	-3	-3	-3	-5	-2
2;2	-4	-4	-3	-4	-4	-4	-4	-4	-5	-3	-4	-4	-4	-4	-4	-4	-4	-4	-4	-4	-6	-4	-3	-4	-3	-2	-3	-3	-3	-3	-4	-4	-4	-2	-2	-3	-3	-3	-5	-2	-3	-3	-3	-3	-3	-2	-3	-2	-3
Cycles / Well
D4	1	2	3	4	5	6	7	8	9	10	11	12	13	14	15	16	17	18	19	20	21	22	23	24	25	26	27	28	29	30	31	32	33	34	35	36	37	38	39	40	41	42	43	44	45	46	47	48	49
Time [s]	0	30.015	60.029	90.044	120.058	150.07	180.085	210.095	240.111	270.124	300.138	330.153	360.18	390.196	420.226	450.256	480.284	510.297	540.321	570.34	600.376	630.385	660.397	690.411	720.424	750.448	780.47	810.494	840.508	870.522	900.554	930.579	960.608	990.618	1020.63	1050.64	1080.66	1110.67	1140.7	1170.72	1200.75	1230.76	1260.79	1290.8	1320.82	1350.83	1380.86	1410.87	1440.89
Temp. [°C]	27.2	27.2	27.3	27.6	27.6	27.5	27.5	27.4	27.5	27.5	27.3	27.2	27.2	27.3	27.4	27.5	27.8	27.8	27.5	27.3	27.3	27	27.1	27.2	27.4	27.5	27.7	27.7	27.7	27.5	27.4	27.3	27.3	27.2	27.3	27.4	27.8	27.8	27.7	27.5	27.4	27.3	27.1	27.1	27.3	27.5	27.8	27.9	27.8
Mean	-3.75	-3.75	-3.75	-4.75	-4	-4.75	-4.5	-4.25	-4.5	-4.25	-4	-4	-4	-4.25	-4.25	-3.5	-3.5	-3.75	-3.5	-4.25	-3.75	-3.75	-3.75	-3.75	-4.25	-4	-4.5	-4.25	-4.25	-4.5	-4	-4	-4.25	-3.75	-3.5	-3.5	-3.5	-3.25	-3.75	-4	-3.5	-4	-2.75	-3.75	-3.25	-2.75	-3	-3.25	-2
StDev	0.5	0.5	0.957427	1.70783	0.816497	0.5	1.29099	1.25831	0.57735	0.5	0	0.816497	0.816497	0.957427	0.5	0.57735	0.57735	0.5	1	0.5	0.5	0.5	0.5	0.957427	0.957427	0	1.29099	0.957427	0.957427	0.57735	0.816497	0.816497	0.957427	0.5	0.57735	0.57735	0.57735	0.5	0.957427	0	0.57735	0.816497	0.957427	1.25831	0.5	0.5	0	0.5	0.816497
1;1	-4	-4	-3	-3	-4	-5	-3	-4	-4	-4	-4	-4	-5	-3	-4	-3	-3	-4	-4	-5	-3	-3	-4	-3	-5	-4	-5	-3	-5	-5	-3	-5	-3	-3	-4	-3	-4	-4	-3	-4	-4	-3	-2	-2	-3	-2	-3	-3	-3
1;2	-4	-3	-3	-7	-5	-5	-5	-3	-4	-4	-4	-4	-4	-5	-4	-4	-3	-4	-2	-4	-4	-4	-3	-3	-3	-4	-3	-5	-5	-5	-4	-4	-4	-4	-3	-4	-4	-3	-3	-4	-4	-4	-4	-5	-3	-3	-3	-4	-1
2;1	-4	-4	-4	-4	-4	-5	-4	-6	-5	-5	-4	-5	-4	-4	-5	-3	-4	-3	-4	-4	-4	-4	-4	-5	-4	-4	-4	-5	-3	-4	-5	-3	-5	-4	-3	-3	-3	-3	-4	-4	-3	-5	-3	-4	-3	-3	-3	-3	-2
2;2	-3	-4	-5	-5	-3	-4	-6	-4	-5	-4	-4	-3	-3	-5	-4	-4	-4	-4	-4	-4	-4	-4	-4	-4	-5	-4	-6	-4	-4	-4	-4	-4	-5	-4	-4	-4	-3	-3	-5	-4	-3	-4	-2	-4	-4	-3	-3	-3	-2
Cycles / Well
D5	1	2	3	4	5	6	7	8	9	10	11	12	13	14	15	16	17	18	19	20	21	22	23	24	25	26	27	28	29	30	31	32	33	34	35	36	37	38	39	40	41	42	43	44	45	46	47	48	49
Time [s]	0	30.015	60.029	90.044	120.058	150.07	180.085	210.095	240.111	270.124	300.138	330.153	360.18	390.196	420.226	450.256	480.284	510.297	540.321	570.34	600.376	630.385	660.397	690.411	720.424	750.448	780.47	810.494	840.508	870.522	900.554	930.579	960.608	990.618	1020.63	1050.64	1080.66	1110.67	1140.7	1170.72	1200.75	1230.76	1260.79	1290.8	1320.82	1350.83	1380.86	1410.87	1440.89
Temp. [°C]	27.2	27.2	27.3	27.6	27.6	27.5	27.5	27.4	27.5	27.5	27.3	27.2	27.2	27.3	27.4	27.5	27.8	27.8	27.5	27.3	27.3	27	27.1	27.2	27.4	27.5	27.7	27.7	27.7	27.5	27.4	27.3	27.3	27.2	27.3	27.4	27.8	27.8	27.7	27.5	27.4	27.3	27.1	27.1	27.3	27.5	27.8	27.9	27.8
Mean	-4	-3.75	-4.5	-4.75	-4.25	-4.5	-4.75	-4.5	-4.25	-4	-3.75	-4.75	-4	-4.5	-4.25	-4	-4.5	-4.25	-4	-4.25	-4	-3.5	-4.25	-3.25	-3.5	-4.5	-4.25	-4	-4	-3.75	-3.5	-4	-4	-3.75	-4	-3.25	-4.75	-4	-4.25	-3.75	-4.25	-3.25	-3	-3.25	-3	-3.25	-3	-3.5	-3
StDev	0	1.70783	0.57735	0.957427	0.957427	0.57735	0.5	0.57735	0.5	1.1547	0.5	0.957427	0	0.57735	0.5	0.816497	0.57735	0.5	0.816497	1.25831	0	0.57735	0.957427	0.5	1.29099	0.57735	0.957427	0	0.816497	0.957427	0.57735	0.816497	1.41421	0.5	1.41421	0.957427	1.5	0.816497	0.957427	0.5	1.25831	1.25831	0	0.5	0	0.5	0	1	0.816497
1;1	-4	-4	-4	-5	-4	-5	-4	-5	-4	-5	-3	-5	-4	-4	-4	-5	-5	-5	-4	-3	-4	-3	-5	-3	-3	-4	-3	-4	-4	-3	-3	-4	-3	-4	-5	-4	-4	-5	-5	-4	-4	-3	-3	-3	-3	-3	-3	-3	-3
1;2	-4	-6	-5	-6	-5	-4	-5	-4	-4	-3	-4	-6	-4	-5	-4	-3	-5	-4	-4	-4	-4	-4	-3	-3	-5	-4	-5	-4	-5	-5	-4	-5	-6	-4	-2	-3	-7	-4	-4	-4	-6	-2	-3	-4	-3	-3	-3	-3	-2
2;1	-4	-3	-5	-4	-5	-5	-5	-5	-4	-3	-4	-4	-4	-5	-4	-4	-4	-4	-5	-6	-4	-4	-4	-4	-4	-5	-4	-4	-4	-4	-4	-4	-3	-3	-4	-4	-4	-4	-3	-4	-4	-3	-3	-3	-3	-4	-3	-5	-4
2;2	-4	-2	-4	-4	-3	-4	-5	-4	-5	-5	-4	-4	-4	-4	-5	-4	-4	-4	-3	-4	-4	-3	-5	-3	-2	-5	-5	-4	-3	-3	-3	-3	-4	-4	-5	-2	-4	-3	-5	-3	-3	-5	-3	-3	-3	-3	-3	-3	-3
Cycles / Well
D6	1	2	3	4	5	6	7	8	9	10	11	12	13	14	15	16	17	18	19	20	21	22	23	24	25	26	27	28	29	30	31	32	33	34	35	36	37	38	39	40	41	42	43	44	45	46	47	48	49
Time [s]	0	30.015	60.029	90.044	120.058	150.07	180.085	210.095	240.111	270.124	300.138	330.153	360.18	390.196	420.226	450.256	480.284	510.297	540.321	570.34	600.376	630.385	660.397	690.411	720.424	750.448	780.47	810.494	840.508	870.522	900.554	930.579	960.608	990.618	1020.63	1050.64	1080.66	1110.67	1140.7	1170.72	1200.75	1230.76	1260.79	1290.8	1320.82	1350.83	1380.86	1410.87	1440.89
Temp. [°C]	27.2	27.2	27.3	27.6	27.6	27.5	27.5	27.4	27.5	27.5	27.3	27.2	27.2	27.3	27.4	27.5	27.8	27.8	27.5	27.3	27.3	27	27.1	27.2	27.4	27.5	27.7	27.7	27.7	27.5	27.4	27.3	27.3	27.2	27.3	27.4	27.8	27.8	27.7	27.5	27.4	27.3	27.1	27.1	27.3	27.5	27.8	27.9	27.8
Mean	-4	-4.25	-4.25	-5	-4	-4.25	-4.5	-4.5	-4.25	-4.5	-4.5	-4.5	-4.25	-4.5	-4.5	-3.75	-4	-4	-4.25	-3.75	-4.5	-4	-4.5	-4.25	-4.25	-4.5	-4.25	-4.25	-4.5	-3.25	-3.75	-4.25	-3.75	-5	-4.25	-3.75	-4.25	-3.5	-3.75	-3.75	-4	-4.25	-4	-4	-4	-2.75	-3.5	-2.75	-3.25
StDev	0	0.5	0.5	0.816497	0.816497	0.957427	1.29099	1	0.5	0.57735	0.57735	0.57735	0.957427	1.29099	1	1.25831	0.816497	0	0.5	1.25831	0.57735	0.816497	1.29099	0.5	0.5	0.57735	0.5	0.5	1	0.5	0.5	1.25831	0.5	2.16025	0.957427	0.957427	0.957427	0.57735	0.5	0.5	0	0.957427	1.1547	0.816497	0.816497	0.957427	0.57735	0.5	0.5
1;1	-4	-5	-4	-5	-3	-5	-3	-4	-4	-5	-5	-4	-3	-5	-5	-5	-3	-4	-5	-2	-4	-3	-3	-4	-4	-4	-4	-4	-4	-3	-4	-4	-4	-3	-4	-3	-3	-3	-4	-3	-4	-3	-3	-5	-3	-2	-4	-3	-3
1;2	-4	-4	-4	-6	-4	-5	-6	-4	-4	-4	-5	-5	-5	-3	-5	-4	-4	-4	-4	-4	-4	-4	-4	-4	-4	-4	-4	-4	-4	-3	-4	-3	-4	-8	-3	-4	-5	-4	-4	-4	-4	-5	-3	-3	-4	-4	-4	-3	-3
2;1	-4	-4	-5	-5	-5	-3	-5	-6	-4	-4	-4	-5	-5	-4	-3	-2	-4	-4	-4	-5	-5	-5	-6	-5	-4	-5	-4	-5	-4	-3	-3	-4	-4	-5	-5	-3	-5	-4	-4	-4	-4	-5	-5	-4	-4	-2	-3	-2	-3
2;2	-4	-4	-4	-4	-4	-4	-4	-4	-5	-5	-4	-4	-4	-6	-5	-4	-5	-4	-4	-4	-5	-4	-5	-4	-5	-5	-5	-4	-6	-4	-4	-6	-3	-4	-5	-5	-4	-3	-3	-4	-4	-4	-5	-4	-5	-3	-3	-3	-4
Cycles / Well
D7	1	2	3	4	5	6	7	8	9	10	11	12	13	14	15	16	17	18	19	20	21	22	23	24	25	26	27	28	29	30	31	32	33	34	35	36	37	38	39	40	41	42	43	44	45	46	47	48	49
Time [s]	0	30.015	60.029	90.044	120.058	150.07	180.085	210.095	240.111	270.124	300.138	330.153	360.18	390.196	420.226	450.256	480.284	510.297	540.321	570.34	600.376	630.385	660.397	690.411	720.424	750.448	780.47	810.494	840.508	870.522	900.554	930.579	960.608	990.618	1020.63	1050.64	1080.66	1110.67	1140.7	1170.72	1200.75	1230.76	1260.79	1290.8	1320.82	1350.83	1380.86	1410.87	1440.89
Temp. [°C]	27.2	27.2	27.3	27.6	27.6	27.5	27.5	27.4	27.5	27.5	27.3	27.2	27.2	27.3	27.4	27.5	27.7	27.8	27.6	27.3	27.3	27	27.1	27.2	27.3	27.5	27.7	27.7	27.7	27.5	27.4	27.3	27.3	27.2	27.3	27.4	27.8	27.8	27.7	27.5	27.4	27.3	27.1	27.1	27.3	27.5	27.8	27.9	27.8
Mean	6401	6633	6878.5	7163	6809.5	6843.25	6780	7207.5	7209.5	6194.5	7083.5	6652.5	7226.5	7211.75	6708.25	7115	6989.25	7430.5	7210	7480.25	7231	7040.25	7434.25	7489.5	7620	7418.5	7382.5	7272.25	7458.75	6990	7581.5	7170.25	7149	7382.25	7129	7643	7360	7030.25	7877.75	7263.75	7802.25	7746.75	7771.25	7460.5	8107	7849.5	7644.25	7950	8024
StDev	555.473	422.285	307.923	429.174	187.44	159.349	716.791	627.204	72.6567	927.967	111.575	671.454	317.875	528.559	622.311	92.459	347.846	176.949	320.153	362.724	285.268	563.138	509.379	490.887	215.751	531.018	438.915	681.834	207.318	559.548	258.227	877.908	664.228	242.798	541.541	549.14	760.629	687.755	342.581	760.276	333.632	178.479	178.718	409.026	641.444	682.545	678.9	137.712	483.833
1;1	6591	6701	6792	7195	6877	6749	7185	6803	7194	7014	7131	7152	7554	7520	7075	7126	7203	7577	7330	7304	7432	7427	7792	7944	7422	7810	7650	7650	7413	7216	7612	7832	7601	7398	7433	8115	7885	7320	7708	7810	8061	7716	7774	7497	7730	8253	8093	7954	8295
1;2	6836	7116	7305	7222	7034	7027	7561	6956	7268	6979	7131	7304	7437	7762	7386	7035	7354	7510	7543	7501	7520	7604	7932	7878	7715	7922	7838	8007	7730	7656	7894	8011	7811	7716	7675	8063	8105	7855	7939	8007	8090	8005	8023	7953	7921	8550	8320	8063	8543
2;1	6591	6627	6845	7639	6726	6920	6008	8143	7263	5463	7155	5987	6899	6972	6080	7241	6608	7460	7183	7977	6977	6692	6871	7139	7879	7110	7158	6500	7464	6391	7556	6280	6418	7162	6451	6965	6503	6343	8328	6458	7661	7665	7639	6953	9059	7038	6867	8028	7783
2;2	5586	6088	6572	6596	6601	6677	6366	6928	7113	5322	6917	6167	7016	6593	6292	7058	6792	7175	6784	7139	6995	6438	7142	6997	7464	6832	6884	6932	7228	6697	7264	6558	6766	7253	6957	7429	6947	6603	7536	6780	7397	7601	7649	7439	7718	7557	7297	7755	7475
Cycles / Well
D8	1	2	3	4	5	6	7	8	9	10	11	12	13	14	15	16	17	18	19	20	21	22	23	24	25	26	27	28	29	30	31	32	33	34	35	36	37	38	39	40	41	42	43	44	45	46	47	48	49
Time [s]	0	30.015	60.029	90.044	120.058	150.07	180.085	210.095	240.111	270.124	300.138	330.153	360.18	390.196	420.226	450.256	480.284	510.297	540.321	570.34	600.376	630.385	660.397	690.411	720.424	750.448	780.47	810.494	840.508	870.522	900.554	930.579	960.608	990.618	1020.63	1050.64	1080.66	1110.67	1140.7	1170.72	1200.75	1230.76	1260.79	1290.8	1320.82	1350.83	1380.86	1410.87	1440.89
Temp. [°C]	27.2	27.2	27.3	27.6	27.6	27.5	27.5	27.4	27.5	27.5	27.3	27.2	27.2	27.3	27.4	27.5	27.7	27.8	27.6	27.3	27.3	27	27.1	27.2	27.3	27.5	27.7	27.7	27.7	27.5	27.4	27.3	27.3	27.2	27.3	27.4	27.7	27.8	27.7	27.5	27.4	27.3	27.1	27.1	27.3	27.5	27.8	27.9	27.8
Mean	5618.5	5824.5	5858.75	6007.5	6088.25	6058.75	6067.5	5813.5	5562.5	5751.5	5622.5	6143.5	5863	5760.25	6193.5	6017	6345	6056	6123.5	6412.5	6443.5	6405.5	6379.25	6236.75	6606.5	6430	6541.25	5878.5	6445.5	6511.75	6554.75	6608.75	6237	6640	6702.5	6414.25	6531.75	6581.25	6566.25	6602.75	6617.75	6723	6495.25	6263.5	6335.5	6463.5	7119.5	6525	6400.25
StDev	380.51	426.124	299.421	168.33	114.433	133.769	349.392	154.075	566.337	493.166	331.271	79.8269	332.992	776.952	151.663	155.388	99.9533	207.39	567.822	276.813	211.03	342.658	533.416	329.358	259.192	314.828	268.255	708.958	304.384	120.45	202.118	171.054	504.298	250.805	213.764	205.395	273.499	420.46	50.2817	133.07	135.792	173.038	210.02	405.899	146.88	554.461	126.958	267.341	614.556
1;1	5776	6039	5894	5962	6103	5955	6187	5932	6037	6195	5817	6042	5996	6393	6040	5896	6306	6224	6613	6658	6544	6576	6809	6432	6681	6589	6698	6275	6550	6484	6520	6561	6598	6384	6753	6338	6349	6949	6602	6655	6499	6733	6247	6521	6375	6931	7164	6400	6822
1;2	5988	6158	6256	6211	6230	6084	6504	5961	6032	6160	5940	6191	6112	6472	6137	6244	6236	6240	6582	6549	6673	6778	6856	6583	6907	6792	6769	6672	6728	6596	6828	6762	6726	6557	6984	6708	6736	6939	6494	6708	6709	6894	6726	6655	6472	6955	7150	6908	7016
2;1	5614	5895	5733	6049	6068	6238	5848	5676	5279	5286	5539	6221	5972	5079	6399	5946	6472	5830	5465	6419	6369	6270	6050	5864	6552	6118	6530	5364	6489	6614	6531	6724	5685	6981	6546	6379	6794	6174	6599	6640	6759	6781	6411	5760	6127	6018	7228	6493	6019
2;2	5096	5206	5552	5808	5952	5958	5731	5685	4902	5365	5194	6120	5372	5097	6198	5982	6366	5930	5834	6024	6188	5998	5802	6068	6286	6221	6168	5203	6015	6353	6340	6388	5939	6638	6527	6232	6248	6263	6570	6408	6504	6484	6597	6118	6368	5950	6936	6299	5744
Cycles / Well
D9	1	2	3	4	5	6	7	8	9	10	11	12	13	14	15	16	17	18	19	20	21	22	23	24	25	26	27	28	29	30	31	32	33	34	35	36	37	38	39	40	41	42	43	44	45	46	47	48	49
Time [s]	0	30.015	60.029	90.044	120.058	150.07	180.085	210.095	240.111	270.124	300.138	330.153	360.18	390.196	420.226	450.256	480.284	510.297	540.321	570.34	600.376	630.385	660.397	690.411	720.424	750.448	780.47	810.494	840.508	870.522	900.554	930.579	960.608	990.618	1020.63	1050.64	1080.66	1110.67	1140.7	1170.72	1200.75	1230.76	1260.79	1290.8	1320.82	1350.83	1380.86	1410.87	1440.89
Temp. [°C]	27.2	27.2	27.3	27.6	27.6	27.5	27.5	27.4	27.5	27.5	27.3	27.2	27.2	27.3	27.4	27.5	27.7	27.8	27.6	27.3	27.3	27	27.1	27.2	27.3	27.5	27.7	27.7	27.7	27.5	27.4	27.3	27.3	27.2	27.3	27.4	27.7	27.8	27.7	27.5	27.4	27.3	27.1	27.1	27.3	27.5	27.8	27.9	27.8
Mean	6095	6015.25	6089.5	6423.5	6101	5986.5	6278.75	6476.75	6370.5	6308.75	6165.25	6443.25	6479.25	6444.25	6584.25	6433.75	6065.5	6133.25	6723	6752	6304	6539.5	6707.75	6796.5	6753.25	6842.5	6557.5	5861.25	6855	6761.25	6680	6886.75	6762.25	6743.75	7021.5	6785.25	6997.75	6502	6449.5	6803	6852.75	6818.25	6783	6746.25	6923.5	6986.75	6891.75	6352	6929.75
StDev	273.693	406.388	212.177	212.01	685.322	453.88	559.855	147.821	99.1783	235.784	476.026	385.337	192.529	344.193	99.3122	499.475	501.842	481.553	234.622	88.5024	542.404	347.788	240.555	108.856	274.763	146.366	380.712	875.741	179.007	219.233	290.649	250.151	420.545	187.912	212.892	108.779	180.006	474.175	291.971	81.5639	381.493	169.246	291.472	437.776	479.72	322.348	558.674	770.63	317.044
1;1	6160	6139	6213	6502	6571	6191	6561	6368	6238	5960	6614	6782	6338	6551	6576	6846	6175	6402	6692	6734	6680	6687	6708	6802	6880	6826	6763	6283	6947	6859	6893	6641	7224	6566	7143	6897	7084	6903	6679	6858	6658	6844	6860	7064	6949	7139	6879	6968	6927
1;2	6286	6362	6321	6673	6791	6524	6871	6365	6464	6427	6532	6735	6706	6850	6664	6841	6679	6633	6827	6795	6809	6918	7007	6897	7063	7032	6936	6888	7054	7001	6956	6836	6883	6637	7199	6860	7199	6915	6720	6850	6618	7038	7118	6975	7073	7131	6562	7059	7111
2;1	6242	6133	5872	6180	5661	5538	5589	6679	6425	6472	5682	6281	6571	6343	6650	5828	5474	5551	6961	6842	5642	6449	6698	6843	6633	6837	6464	5236	6763	6492	6514	7236	6729	6992	7022	6696	6917	6018	6249	6821	7422	6754	6738	6842	7407	7173	7683	5574	7196
2;2	5692	5427	5952	6339	5381	5693	6094	6495	6355	6376	5833	5975	6302	6033	6447	6220	5934	5947	6412	6637	6085	6104	6418	6644	6437	6675	6067	5038	6656	6693	6357	6834	6213	6780	6722	6688	6791	6172	6150	6683	6713	6637	6416	6104	6265	6504	6443	5807	6485
Cycles / Well
D10	1	2	3	4	5	6	7	8	9	10	11	12	13	14	15	16	17	18	19	20	21	22	23	24	25	26	27	28	29	30	31	32	33	34	35	36	37	38	39	40	41	42	43	44	45	46	47	48	49
Time [s]	0	30.015	60.029	90.044	120.058	150.07	180.085	210.095	240.111	270.124	300.138	330.153	360.18	390.196	420.226	450.256	480.284	510.297	540.321	570.34	600.376	630.385	660.397	690.411	720.424	750.448	780.47	810.494	840.508	870.522	900.554	930.579	960.608	990.618	1020.63	1050.64	1080.66	1110.67	1140.7	1170.72	1200.75	1230.76	1260.79	1290.8	1320.82	1350.83	1380.86	1410.87	1440.89
Temp. [°C]	27.2	27.2	27.3	27.6	27.6	27.5	27.5	27.4	27.5	27.5	27.3	27.2	27.2	27.3	27.4	27.5	27.7	27.8	27.6	27.3	27.3	27	27.1	27.2	27.3	27.5	27.7	27.7	27.7	27.5	27.4	27.3	27.3	27.2	27.3	27.4	27.7	27.8	27.7	27.5	27.4	27.3	27.1	27.1	27.3	27.5	27.8	27.9	27.8
Mean	7396	7743	7296.5	7703.25	7484.75	7952.5	7323.25	8001.5	7867.75	7473	7768.75	8120	8467.25	8205.75	8841.25	8745.25	8488.25	8893.5	8915	8831.5	9235	8493.25	8694.75	8962	9167.25	9138.75	9355.25	9091	9130.25	9093	9027.5	9332.75	9711.5	9012.25	9262.25	9888.75	9740.5	10211.2	9796.5	9649.5	10260.2	9464.5	9538	10183.2	10177	10019.5	10427.2	9756.75	9981.5
StDev	694.122	224.981	830.315	1005.75	536.125	738.652	1037.94	183.275	197.601	1051.6	533.099	129.159	85.4298	668.699	193.038	172.33	409.791	194.761	238.06	59.7913	261.321	274.705	709.426	118.071	372.035	424.798	207.204	301.354	351.711	587.472	1006.87	318.468	339.038	848.397	905.574	253.403	529.201	185.369	234.661	197.831	93.557	1105.51	388.322	342.608	478.973	334.095	352.918	900.324	239.001
1;1	7406	7617	7720	8351	7661	8360	8074	7841	7816	8374	8192	8055	8410	8705	8730	8541	8792	8742	8885	8773	9154	8401	9124	8842	9496	9221	9283	8820	8900	8965	9934	9147	9459	9631	10074	9522	9957	10319	9935	9595	10225	10300	9548	10402	10460	9917	10607	9955	9963
1;2	8028	7941	8214	8572	7912	8612	8354	8084	8153	8386	8239	8292	8590	8835	8960	8759	8879	8804	9150	8906	9485	8644	9432	8992	9481	9574	9475	9517	9543	9932	9848	9795	9666	9817	10013	9923	10297	10307	10054	9817	10388	10534	10082	10531	10630	10189	10770	10917	10297
2;1	7723	7924	6898	7541	7666	7902	6335	8221	7697	6682	7485	8139	8408	7814	9044	8961	8235	9178	9028	8852	9397	8775	8337	8901	8812	9205	9564	9066	9295	8561	7998	9289	10203	8060	8573	10026	9050	10285	9573	9393	10261	8583	9299	9793	9552	10369	10375	9326	9716
2;2	6427	7490	6354	6349	6700	6936	6530	7860	7805	6450	7159	7994	8461	7469	8631	8720	8047	8850	8597	8795	8904	8153	7886	9113	8880	8555	9099	8961	8783	8914	8330	9100	9518	8541	8389	10084	9658	9934	9624	9793	10167	8441	9223	10007	10066	9603	9957	8829	9950
Cycles / Well
D11	1	2	3	4	5	6	7	8	9	10	11	12	13	14	15	16	17	18	19	20	21	22	23	24	25	26	27	28	29	30	31	32	33	34	35	36	37	38	39	40	41	42	43	44	45	46	47	48	49
Time [s]	0	30.015	60.029	90.044	120.058	150.07	180.085	210.095	240.111	270.124	300.138	330.153	360.18	390.196	420.226	450.256	480.284	510.297	540.321	570.34	600.376	630.385	660.397	690.411	720.424	750.448	780.47	810.494	840.508	870.522	900.554	930.579	960.608	990.618	1020.63	1050.64	1080.66	1110.67	1140.7	1170.72	1200.75	1230.76	1260.79	1290.8	1320.82	1350.83	1380.86	1410.87	1440.89
Temp. [°C]	27.2	27.2	27.3	27.6	27.6	27.5	27.5	27.4	27.5	27.5	27.3	27.2	27.2	27.3	27.4	27.5	27.7	27.8	27.6	27.3	27.3	27	27.1	27.2	27.3	27.5	27.7	27.7	27.7	27.5	27.4	27.3	27.3	27.2	27.3	27.4	27.7	27.8	27.7	27.5	27.4	27.3	27.1	27.1	27.3	27.5	27.8	27.9	27.8
Mean	7806.25	8256	8202.25	8033.25	8660.25	7926	7981.75	8877.5	7926.75	8486.75	8492.5	8467.75	8411.25	8341.75	8624.5	8963.75	9299	8666	9212.25	9536.25	8990.75	9159.25	9445	9274.75	9094.75	9020.5	9196.5	9422.75	10011	9713	9746.25	9919.5	10428	10107	9774.5	9955.5	10370	10284	10377.2	9944.25	9588.75	10268.2	10262.5	10532.2	10494.8	10845.8	10681.8	10690.8	10418
StDev	835.289	275.167	207.649	723.568	413.925	655.046	593.237	237.662	532.003	373.332	487.676	659.437	741.956	512.196	528.567	1009.2	159.46	205.917	326.841	228.245	848.917	520.693	353.671	755.889	510.403	569.398	353.987	907.473	434.325	851.905	373.8	336.205	106.911	169.537	205.533	352.255	405.385	306.132	292.329	762.204	783.26	851.541	379.137	217.754	1162.24	289.991	306.394	1137.28	728.678
1;1	7984	8084	8062	8248	8617	8200	8291	8544	7856	8627	7947	8916	8724	8570	8838	9714	9130	8444	9025	9470	9530	9231	9302	9465	9342	9405	8904	10018	10279	10301	9361	9488	10395	9974	9503	10062	10639	9916	10007	10378	9921	10802	9778	10231	11381	10848	10316	11329	11013
1;2	8672	8667	8511	8687	9124	8536	8622	8979	8447	8908	8227	9080	9197	8805	9156	9942	9364	8829	9125	9607	9832	9755	9896	10170	9597	9578	9525	10242	10426	10526	9613	9835	10404	10290	9993	10320	10788	10647	10673	10797	10472	11038	10414	10676	11499	11255	10668	11870	10950
2;1	7904	8130	8109	8199	8773	7958	7284	9096	8188	8384	8989	8226	7454	7621	8593	8244	9489	8853	9696	9805	8625	9165	9519	9111	8414	8362	9480	9187	9880	9320	10249	10257	10581	10212	9845	9478	10097	10370	10535	9301	8656	9143	10672	10707	9064	10632	11066	9318	10255
2;2	6665	8143	8127	6999	8127	7010	7730	8891	7216	8028	8807	7649	8270	8371	7911	7955	9213	8538	9003	9263	7976	8486	9063	8353	9026	8737	8877	8244	9459	8705	9762	10098	10332	9952	9757	9962	9956	10203	10294	9301	9306	10090	10186	10515	10035	10648	10677	10246	9454
Cycles / Well
D12	1	2	3	4	5	6	7	8	9	10	11	12	13	14	15	16	17	18	19	20	21	22	23	24	25	26	27	28	29	30	31	32	33	34	35	36	37	38	39	40	41	42	43	44	45	46	47	48	49
Time [s]	0	30.015	60.029	90.044	120.058	150.07	180.085	210.095	240.111	270.124	300.138	330.153	360.18	390.196	420.226	450.256	480.284	510.297	540.321	570.34	600.376	630.385	660.397	690.411	720.424	750.448	780.47	810.494	840.508	870.522	900.554	930.579	960.608	990.618	1020.63	1050.64	1080.66	1110.67	1140.7	1170.72	1200.75	1230.76	1260.79	1290.8	1320.82	1350.83	1380.86	1410.87	1440.89
Temp. [°C]	27.2	27.3	27.3	27.5	27.6	27.5	27.5	27.4	27.5	27.5	27.3	27.2	27.2	27.3	27.4	27.5	27.7	27.8	27.6	27.4	27.3	27	27.1	27.2	27.3	27.5	27.7	27.7	27.7	27.5	27.4	27.3	27.3	27.2	27.3	27.4	27.7	27.8	27.7	27.5	27.4	27.3	27.1	27.1	27.3	27.5	27.8	27.9	27.8
Mean	10620	9609.5	10763	9646.5	10128.2	11019.8	9897	10018.2	10201.2	10360.5	11244.5	11329	10098.8	10917.8	11050.2	10561.8	10756	10851	11586	10977.8	11528.8	11084.5	11040	10772.5	11889.2	11954.8	11314.2	11213.2	11002	11600.8	12536.2	12111	12653.2	12807.8	12187	12814.2	11318.2	12546.5	12883.5	11796.8	13198.8	12352	12127.8	12611.8	11811.5	11660.8	12948	12192.2	13302.8
StDev	1534.3	2326.96	1619.75	2430.96	2039.27	1088.7	2738.38	2451.86	2042	2541.42	1034.03	982.237	3189.23	1680.48	2329.01	2795.84	1888.74	2405.15	1267.32	2353.64	1204.83	1903.66	2283.55	2186.42	1553.08	1517.88	2558.45	3009.16	2613.11	3344.65	1512.3	1674.37	1135.68	1227.3	1725.3	1275.84	2934.57	1812.11	1994.89	2297.67	1302.84	1908.75	2957.16	2475.37	2453.87	2851.22	1336.42	3331.18	1492.41
1;1	11247	11488	11683	11807	11861	11847	12011	11658	11751	12213	11802	12048	12403	12158	12845	12573	12293	12874	12227	12837	12236	12523	12968	12386	12954	13002	13128	13505	13139	14357	13284	13601	13170	13506	13396	13706	13442	13877	13952	13596	13962	13890	14262	14478	13882	13968	14050	14498	14185
1;2	12354	11756	12557	11664	11917	12042	12510	12552	12175	12884	12351	12259	13253	12573	13277	13265	12464	12970	12996	13185	12847	12930	13045	12919	13411	13470	13881	14114	13379	14628	14243	13514	13725	14094	13941	14074	14243	14337	15152	13951	14530	14115	15082	15016	13979	14246	14107	15603	14830
2;1	10101	7659	9654	7920	8176	10336	7417	7602	8393	8204	10792	10781	6947	9438	9099	7503	8853	9091	10958	9049	10697	9489	8780	9068	11066	11017	9411	8523	8945	8902	11743	10528	12631	12267	10738	12044	8678	10937	11419	9551	12673	10765	9635	10462	9915	9669	12167	9308	12676
2;2	8778	7535	9158	7195	8559	9854	7650	8261	8486	8141	10033	10228	7792	9502	8980	8906	9414	8469	10163	8840	10335	9396	9367	8717	10126	10330	8837	8711	8545	8516	10875	10801	11087	11364	10673	11433	8910	11035	11011	10089	11630	10638	9532	10491	9470	8760	11468	9360	11520
Cycles / Well
Cdc42 alone	1	2	3	4	5	6	7	8	9	10	11	12	13	14	15	16	17	18	19	20	21	22	23	24	25	26	27	28	29	30	31	32	33	34	35	36	37	38	39	40	41	42	43	44	45	46	47	48	49
Time [s]	0	30.015	60.028	90.062	120.092	150.108	180.051	210.073	240.081	270.086	300.092	330.097	360.11	390.118	420.127	450.135	480.143	510.148	540.162	570.175	600.183	630.188	660.195	690.206	720.21	750.235	780.256	810.264	840.283	870.293	900.298	930.305	960.322	990.345	1020.35	1050.36	1080.37	1110.39	1140.39	1170.41	1200.42	1230.43	1260.44	1290.44	1320.46	1350.46	1380.49	1410.49	1440.5
Temp. [°C]	27.5	27.7	27.8	27.7	27.6	27.5	27.4	27.4	27.6	27.7	27.9	28	28	27.9	27.6	27.5	27.3	27.2	27.4	27.5	27.7	28	27.9	27.9	27.7	27.5	27.4	27.3	27.3	27.5	27.6	27.8	27.9	27.8	27.7	27.5	27.6	27.4	27.4	27.4	27.7	27.9	27.9	27.8	27.7	27.6	27.5	27.3	27.3
Mean	2780	2759	2825	2853	2841	2869	2885	2915	2983	2993	3029	3060	3106	3077	3139	3150	3159	3203	3231	3232	3250	3294	3316	3369	3407	3418	3488	3487	3564	3573	3585	3624	3712	3691	3724	3708	3836	3807	3840	3895	3910	3960	4006	4004	4135	4081	4118	4192	4210
[truncated: 16 more columns]
