# Supplementary material for: ERK3/MAPK6 dictates CDC42/RAC1 activity and ARP2/3-dependent actin polymerization
Source: eLife journal article supplement (doi:10.7554/elife.85167), 2023-04-14
Supplement: fig4-data2 [file Figure 4F and 4G-source data.xlsx]

## Sheet: Sheet1
Image	Pearson	Spearman				Pearson above	Pearson below
1	0.79	0.832				0.69	0.12
2	0.71	0.7514				0.61	-0.01
3	0.74	0.7745				0.65	-0.02
4
5	0.63	0.6745				0.47	0
6
7	0.69	0.7261				0.54	0.07
8	0.57	0.6535				0.45	0
9	0.55	0.6042				0.29	0
10
11	0.63	0.6812				0.44	-0.01
