# Supplementary material for: ERK3/MAPK6 dictates CDC42/RAC1 activity and ARP2/3-dependent actin polymerization
Source: eLife journal article supplement (doi:10.7554/elife.85167), 2023-04-14
Supplement: fig5-data2 [file Figure 5E-source data.xlsx]

## Sheet: Sheet1
shERK3						CrispR ERK3
						run 2/11/2020		Rep3
run 14/09/20	Rep1
							F actin	G actin	F/G ratio
	F	G	F/G			CrC	16978844	11718619	1.44888
shCo	16495146	11521083	1.43174			CrERK3	6022983	15286205	0.394014
shERK3	5047527	9664497	0.522275
run 20/01/21	Rep2					Rerun only CrC/CCrERK3 run 13/11/2020				Rep4
							F actin	G actin	F/G ratio
	F	G	F/G			CrC	17942347	13199205	1.35935
shCo	28084095	17022874	1.64979			CrERK3	8076355	16793175	0.480931
shERK3	12256631	26252832	0.466869
						run 16/11/20					Rep5
							F actin	G actin	F/G ratio
						CrC	22039004	20981631	1.0504
						CrERK3	11276012	22227146	0.507308
