# Supplementary material for: ERK3/MAPK6 dictates CDC42/RAC1 activity and ARP2/3-dependent actin polymerization
Source: eLife journal article supplement (doi:10.7554/elife.85167), 2023-04-14
Supplement: fig5-data3 [file Figure 5F-source data.xlsx]

## Sheet: all replicates
	Time	0	30.012	60.024	90.036	120.05	150.086	180.098	210.111	240.123	270.136	300.143	330.154	360.183	390.197	420.21	450.224	480.236	510.249	540.263	570.309	600.325	630.338	660.35	690.368	720.382	750.395	780.409	810.422	840.433	870.446	900.459	930.471	960.482	990.495	1020.51	1050.52	1080.54	1110.55	1140.56	1170.58	1200.59	1230.6	1260.62	1290.67	1320.68	1350.7	1380.71	1410.74
	Buffer	559.75	569.25	549.5	547.5	540.25	534.5	536.75	535.5	534	533.75	529	528.75	528.75	527.75	526.25	527.75	524.25	525.25	524	522.75	523.5	520.75	520.25	516.75	516.25	515.75	516.5	516.25	512.75	515.25	514	512.75	513	510.75	513.75	513.5	513.5	516	512.5	512.5	513.75	513.25	512.25	511.75	512	512	511.75	513.25
	Actin	7928	7955.5	8179.75	8497.75	8818.5	9164.75	9508.75	9865.75	10236	10574.8	10944.5	11310.8	11632.2	11929.2	12270.8	12568.8	12866.2	13161.5	13490.8	13722.5	14039.2	14217	14483.2	14771.5	14970.2	15219	15371.5	15604.2	15778	15950.2	16160	16347.8	16505.8	16631	16808.2	17008.8	17143.2	17256.5	17471.2	17599.2	17605.8	17843.8	17910.5	18046.2	18100	18185.8	18274.8	18402.2
	Actin+ARP2/3	7353.25	7565.75	7801.5	8076.25	8346.25	8595.5	8884.5	9131.25	9414.75	9663	9952.75	10184	10436.8	10689	10939.8	11227.5	11459.5	11674	11939.2	12176.5	12364.2	12631.2	12899.5	13055.8	13347.2	13477.8	13735.5	13967.2	14144	14334.2	14561.5	14728.2	14954.2	15124.5	15361.5	15573.2	15711	15942	16062	16294	16446.8	16568.5	16779.2	16947.8	17102	17233	17342.8	17528
	Actin+ERK3	8459.25	8641.75	8896.75	9230.75	9597.5	9950	10293.2	10703.8	11085	11431.5	11818.5	12193	12587.8	12958.5	13326.2	13717	14026.8	14395	14722.8	15018	15283	15562	15862.2	16078.2	16371	16620.8	16849.8	17129	17380.8	17584	17791.5	18004.2	18221	18462.5	18653.5	18907	19075.5	19252	19420	19564.8	19778.8	19947.2	20100.8	20223.2	20361.2	20481.8	20634.8	20821.2
	Actin	7716	7897	8118.5	8364.25	8653	8928.75	9243	9522.75	9873	10135.5	10434.2	10729.2	11044.2	11318.5	11622	11877.2	12183.8	12442.5	12705	12951.2	13220	13493.5	13703.8	13915.8	14188	14363.8	14578.2	14823.8	15010.8	15201.8	15378	15534	15744.2	15954	16086.8	16292.8	16440	16644.5	16689.2	16872.2	17012.2	17173	17309	17532.8	17568	17642.2	17774	17919.5
	Actin+ARP2/3	8017.25	8210.25	8454.5	8750.25	9091.5	9418.75	9775.5	10107	10450.8	10822.2	11186.2	11555	11881.5	12207.2	12580	12897.5	13182.8	13495	13798.2	14110.5	14347.2	14613.2	14937	15154	15413	15641.8	15828.8	16047.2	16287.2	16486.5	16655	16812	17002.5	17195.5	17331.2	17505.5	17722	17857	17988.2	18165.5	18264.2	18383.2	18555	18670.2	18758.8	18881.8	18991.5	19103
	Actin	7207.5	7272.5	7456.25	7705.75	7996.5	8305.5	8595.5	8911	9228.25	9524.75	9873.25	10181.8	10490.2	10835	11145.5	11447.8	11735.8	12029.5	12242.5	12552.2	12824.8	12957.2	13209.8	13424.5	13684.8	13865.5	14066.5	14251.8	14430.5	14588	14781.2	14960.8	15131	15304.2	15460.2	15590	15753.5	15890	16016	16189	16277	16411.8	16546	16620	16710	16831.8	16935	17086.2
	Actin+ERK3	7256.25	7360.5	7593.25	7849.25	8142.75	8457.25	8752.75	9137	9440.25	9779	10097.5	10407.8	10730.5	11032.2	11324.2	11653.2	11946.5	12214.8	12474.5	12802.8	13005	13235	13529.8	13759	13955	14179.8	14361.8	14528.5	14776.8	14971.2	15135.8	15314.8	15481.8	15675	15794.5	15963	16128.8	16254.8	16394.5	16505.2	16670.5	16773.2	16838.2	16973.5	17080	17215.2	17348.2	17414.5
	Actin+ERK3	7353.25	7565.75	7801.5	8076.25	8346.25	8595.5	8884.5	9131.25	9414.75	9663	9952.75	10184	10436.8	10689	10939.8	11227.5	11459.5	11674	11939.2	12176.5	12364.2	12631.2	12899.5	13055.8	13347.2	13477.8	13735.5	13967.2	14144	14334.2	14561.5	14728.2	14954.2	15124.5	15361.5	15573.2	15711	15942	16062	16294	16446.8	16568.5	16779.2	16947.8	17102	17233	17342.8	17528
minus buffer
	Actin	7368.25	7386.25	7630.25	7950.25	8278.25	8630.25	8972	9330.25	9702	10041	10415.5	10782	11103.5	11401.5	11744.5	12041	12342	12636.2	12966.8	13199.8	13515.8	13696.2	13963	14254.8	14454	14703.2	14855	15088	15265.2	15435	15646	15835	15992.8	16120.2	16294.5	16495.2	16629.8	16740.5	16958.8	17086.8	17092	17330.5	17398.2	17534.5	17588	17673.8	17763	17889
	Actin+ARP2/3	6793.5	6996.5	7252	7528.75	7806	8061	8347.75	8595.75	8880.75	9129.25	9423.75	9655.25	9908	10161.2	10413.5	10699.8	10935.2	11148.8	11415.2	11653.8	11840.8	12110.5	12379.2	12539	12831	12962	13219	13451	13631.2	13819	14047.5	14215.5	14441.2	14613.8	14847.8	15059.8	15197.5	15426	15549.5	15781.5	15933	16055.2	16267	16436	16590	16721	16831	17014.8
	Actin+ERK3	7899.5	8072.5	8347.25	8683.25	9057.25	9415.5	9756.5	10168.2	10551	10897.8	11289.5	11664.2	12059	12430.8	12800	13189.2	13502.5	13869.8	14198.8	14495.2	14759.5	15041.2	15342	15561.5	15854.8	16105	16333.2	16612.8	16868	17068.8	17277.5	17491.5	17708	17951.8	18139.8	18393.5	18562	18736	18907.5	19052.2	19265	19434	19588.5	19711.5	19849.2	19969.8	20123	20308
	Actin	7156.25	7327.75	7569	7816.75	8112.75	8394.25	8706.25	8987.25	9339	9601.75	9905.25	10200.5	10515.5	10790.8	11095.8	11349.5	11659.5	11917.2	12181	12428.5	12696.5	12972.8	13183.5	13399	13671.8	13848	14061.8	14307.5	14498	14686.5	14864	15021.2	15231.2	15443.2	15573	15779.2	15926.5	16128.5	16176.8	16359.8	16498.5	16659.8	16796.8	17021	17056	17130.2	17262.2	17406.2
	Actin+ARP2/3	7457.5	7641	7905	8202.75	8551.25	8884.25	9238.75	9571.5	9916.75	10288.5	10657.2	11026.2	11352.8	11679.5	12053.8	12369.8	12658.5	12969.8	13274.2	13587.8	13823.8	14092.5	14416.8	14637.2	14896.8	15126	15312.2	15531	15774.5	15971.2	16141	16299.2	16489.5	16684.8	16817.5	16992	17208.5	17341	17475.8	17653	17750.5	17870	18042.8	18158.5	18246.8	18369.8	18479.8	18589.8
	Actin	6647.75	6703.25	6906.75	7158.25	7456.25	7771	8058.75	8375.5	8694.25	8991	9344.25	9653	9961.5	10307.2	10619.2	10920	11211.5	11504.2	11718.5	12029.5	12301.2	12436.5	12689.5	12907.8	13168.5	13349.8	13550	13735.5	13917.8	14072.8	14267.2	14448	14618	14793.5	14946.5	15076.5	15240	15374	15503.5	15676.5	15763.2	15898.5	16033.8	16108.2	16198	16319.8	16423.2	16573
	Actin+ERK3	6696.5	6791.25	7043.75	7301.75	7602.5	7922.75	8216	8601.5	8906.25	9245.25	9568.5	9879	10201.8	10504.5	10798	11125.5	11422.2	11689.5	11950.5	12280	12481.5	12714.2	13009.5	13242.2	13438.8	13664	13845.2	14012.2	14264	14456	14621.8	14802	14968.8	15164.2	15280.8	15449.5	15615.2	15738.8	15882	15992.8	16156.8	16260	16326	16461.8	16568	16703.2	16836.5	16901.2
	Actin+ERK3	6793.5	6996.5	7252	7528.75	7806	8061	8347.75	8595.75	8880.75	9129.25	9423.75	9655.25	9908	10161.2	10413.5	10699.8	10935.2	11148.8	11415.2	11653.8	11840.8	12110.5	12379.2	12539	12831	12962	13219	13451	13631.2	13819	14047.5	14215.5	14441.2	14613.8	14847.8	15059.8	15197.5	15426	15549.5	15781.5	15933	16055.2	16267	16436	16590	16721	16831	17014.8
	Time	0	30.012	60.024	90.036	120.05	150.086	180.098	210.111	240.123	270.136	300.143	330.154	360.183	390.197	420.21	450.224	480.236	510.249	540.263	570.309	600.325	630.338	660.35	690.368	720.382	750.395	780.409	810.422	840.433	870.446	900.459	930.471	960.482	990.495	1020.51	1050.52	1080.54	1110.55	1140.56	1170.58	1200.59	1230.6	1260.62	1290.67	1320.68	1350.7	1380.71	1410.74
	Buffer	559.75	569.25	549.5	547.5	540.25	534.5	536.75	535.5	534	533.75	529	528.75	528.75	527.75	526.25	527.75	524.25	525.25	524	522.75	523.5	520.75	520.25	516.75	516.25	515.75	516.5	516.25	512.75	515.25	514	512.75	513	510.75	513.75	513.5	513.5	516	512.5	512.5	513.75	513.25	512.25	511.75	512	512	511.75	513.25
	Actin	3624	3732.5	3894.75	4081.75	4280.25	4513.25	4745.5	5000	5242	5506.75	5776.5	6048	6341.75	6628.25	6889.25	7182	7473.25	7774	8060.75	8335	8595.5	8903.75	9163.5	9427.75	9713.75	9941.75	10185.2	10467.8	10705.8	10934	11133	11371.8	11624.2	11806.5	12012.5	12202	12395.8	12597.2	12811	12980.8	13186	13366.2	13516	13713.2	13907.8	14058.8	14234	14448.8
	Actin+ARP2/3+WASP (VCA)	3676	3794.75	3968.25	4164.75	4355.75	4574.5	4798	5021	5226	5473.5	5703	5926.5	6149.75	6378	6638.5	6863.25	7087.25	7338.25	7574.75	7810.75	8051.75	8283.75	8517.75	8753.75	8994.75	9236.5	9460.25	9694	9923.5	10133	10348.2	10561.2	10773.8	10989.5	11209.5	11381.8	11584.2	11805.5	12001	12161.8	12337.8	12529.2	12689.8	12892.5	13096.8	13242.8	13459.2	13617.5
	Actin+ARP2/3+WASP (VCA)	3662.75	3778.75	3962.5	4142.25	4334.75	4554.75	4765.75	4983.25	5186.5	5417	5658.25	5874.25	6091.5	6308	6547.25	6774.25	6995	7234.75	7472.75	7726.5	7957	8207	8431	8672.25	8897	9125	9361.5	9566.25	9821	10023.8	10259	10478.2	10669.8	10903.2	11097.8	11347	11536.5	11744.2	11944	12082.5	12293.8	12532.2	12696.5	12906.8	13054.5	13272	13502	13633.2
	Actin+ERK3 4,8nM+ARP2/3	3616.25	3760.75	3957.75	4184.75	4426	4672.5	4962.75	5243.75	5541	5839	6132.25	6446	6768.75	7091.5	7393.5	7701.25	8020	8340	8680	8984.75	9268.5	9585	9897.25	10160	10475	10753.5	11036.8	11296.8	11519	11808.2	12055.5	12255	12514.2	12721	12951.5	13164.5	13382.5	13569.2	13782.2	13900.5	14062.8	14250.8	14467	14649	14826.5	14995.2	15182.5	15323.5
minus buffer
	Actin+ARP2/3+WASP (VCA)	3116.25	3225.5	3418.75	3617.25	3815.5	4040	4261.25	4485.5	4692	4939.75	5174	5397.75	5621	5850.25	6112.25	6335.5	6563	6813	7050.75	7288	7528.25	7763	7997.5	8237	8478.5	8720.75	8943.75	9177.75	9410.75	9617.75	9834.25	10048.5	10260.8	10478.8	10695.8	10868.2	11070.8	11289.5	11488.5	11649.2	11824	12016	12177.5	12380.8	12584.8	12730.8	12947.5	13104.2
	Actin+ARP2/3+WASP (VCA)	3103	3209.5	3413	3594.75	3794.5	4020.25	4229	4447.75	4652.5	4883.25	5129.25	5345.5	5562.75	5780.25	6021	6246.5	6470.75	6709.5	6948.75	7203.75	7433.5	7686.25	7910.75	8155.5	8380.75	8609.25	8845	9050	9308.25	9508.5	9745	9965.5	10156.8	10392.5	10584	10833.5	11023	11228.2	11431.5	11570	11780	12019	12184.2	12395	12542.5	12760	12990.2	13120
	Actin+ERK3 4,8nM+ARP2/3	3056.5	3191.5	3408.25	3637.25	3885.75	4138	4426	4708.25	5007	5305.25	5603.25	5917.25	6240	6563.75	6867.25	7173.5	7495.75	7814.75	8156	8462	8745	9064.25	9377	9643.25	9958.75	10237.8	10520.2	10780.5	11006.2	11293	11541.5	11742.2	12001.2	12210.2	12437.8	12651	12869	13053.2	13269.8	13388	13549	13737.5	13954.8	14137.2	14314.5	14483.2	14670.8	14810.2
		0	30.044	60.057	90.071	120.081	150.094	180.107	210.118	240.128	270.138	300.164	330.181	360.193	390.202	420.215	450.226	480.252	510.264	540.279	570.291	600.304	630.331	660.358	690.368	720.381	750.39	780.403	810.412	840.425	870.436	900.449	930.462	960.479	990.488	1020.5	1050.51	1080.52	1110.54	1140.55	1170.56	1200.57	1230.58	1260.62	1290.63	1320.64	1350.66	1380.67	1410.68
	Buffer	532.75	506.5	506.25	505.25	505.75	506.25	500	506	507.5	513.25	514.5	517.5	520.75	523.5	523.75	531.75	536.75	540.75	543.5	546.5	548.25	553	551.75	548.75	545.75	543.75	543	541.25	542	541.25	540.5	542.5	549.5	555	572	594.5	612.75	641.75	659.75	675	681.25	692.5	695.75	701.5	702.25	697.5	693.25	687.75
	Actin+ARP2/3	4782.25	4269.5	4576	5026	4811.5	5333.5	5161.75	5538	5865.75	6008.75	6292	6800	6920.5	7483	8200.25	8025.25	8466	8871.25	8994	9460.25	9802.25	10167.8	10257.5	10678	10951.2	11237.2	11396.5	11679.2	11881.2	12294	12416	12833.8	13050.8	13213.8	13567	13649	14217.5	14088.8	14724.5	14657	14918.2	15424	15356	15532.2	15901.2	15726.2	15726.8	16192.2
	Actin+ARP2/3+ERK3	3704.25	3803	3952.25	4133.5	4328	4523	4736.5	4966.5	5187	5448.5	5686.25	5942.5	6193.25	6458	6738.25	7011.25	7289.25	7586.5	7863.5	8166	8443.75	8732	9036.75	9307.5	9610	9907	10213	10465.8	10691.2	10998.8	11261.2	11518.2	11780.5	12024	12276	12516	12735.8	12981.8	13199.2	13442.8	13643.8	13870.8	14093.2	14344	14531	14694.5	14866.2	15087
	Actin+ARP2/3+WASP (VCA)	3951.25	4089	4199	4379.75	4552.25	4745.5	4950	5189.25	5372.75	5593.5	5817.25	6047.25	6282.75	6536.5	6807.5	7063	7329.25	7585.25	7887.75	8162.25	8445	8736.25	8995.75	9295.25	9524	9820.25	10079.8	10353.2	10601.5	10906	11128.5	11407.2	11684	11919.8	12193	12434.2	12659.8	12926.5	13144.8	13357.2	13643	13850.5	14046.2	14269	14472.5	14698.2	14866	15078.8
	Actin+ERK3 4,8nM+ARP2/3	3665.75	3768	3973	4213.5	4448.75	4701.75	4970.75	5262.75	5563.25	5899.5	6202.5	6543.25	6878.25	7220.75	7580	7928.75	8268	8620	8928.75	9278.25	9581.25	9909.25	10243.5	10541.2	10850.8	11143.5	11455.5	11734.5	11987.8	12258	12541.8	12797	13021	13353.5	13497.5	13697.8	13923.2	14157.2	14366.8	14564.5	14696.2	14945	15136.2	15280.5	15495	15631.2	15810.8	15973
	Actin+ARP2/3+WASP (VCA)	3936.75	4040.5	4206.75	4402.25	4661.75	4933.25	5214	5527.5	5821.5	6142.75	6489	6859.75	7212	7542.25	7887.5	8257.25	8623.75	8918.75	9300.75	9644.75	9996	10321.8	10637.8	10971.8	11267	11567	11862.5	12184.2	12402.2	12667	12912.5	13230.8	13404.8	13675.5	13887.5	14082.8	14326.8	14494.8	14731.5	14958.2	15111.2	15290.2	15465.8	15658.8	15796.5	15901.5	16140.2	16258.2
minus buffer
	Actin+ARP2/3	4249.5	3763	4069.75	4520.75	4305.75	4827.25	4661.75	5032	5358.25	5495.5	5777.5	6282.5	6399.75	6959.5	7676.5	7493.5	7929.25	8330.5	8450.5	8913.75	9254	9614.75	9705.75	10129.2	10405.5	10693.5	10853.5	11138	11339.2	11752.8	11875.5	12291.2	12501.2	12658.8	12995	13054.5	13604.8	13447	14064.8	13982	14237	14731.5	14660.2	14830.8	15199	15028.8	15033.5	15504.5
	Actin+ARP2/3+ERK3	3171.5	3296.5	3446	3628.25	3822.25	4016.75	4236.5	4460.5	4679.5	4935.25	5171.75	5425	5672.5	5934.5	6214.5	6479.5	6752.5	7045.75	7320	7619.5	7895.5	8179	8485	8758.75	9064.25	9363.25	9670	9924.5	10149.2	10457.5	10720.8	10975.8	11231	11469	11704	11921.5	12123	12340	12539.5	12767.8	12962.5	13178.2	13397.5	13642.5	13828.8	13997	14173	14399.2
	Actin+ARP2/3+WASP (VCA)	3418.5	3582.5	3692.75	3874.5	4046.5	4239.25	4450	4683.25	4865.25	5080.25	5302.75	5529.75	5762	6013	6283.75	6531.25	6792.5	7044.5	7344.25	7615.75	7896.75	8183.25	8444	8746.5	8978.25	9276.5	9536.75	9812	10059.5	10364.8	10588	10864.8	11134.5	11364.8	11621	11839.8	12047	12284.8	12485	12682.2	12961.8	13158	13350.5	13567.5	13770.2	14000.8	14172.8	14391
	Actin+ERK3 4,8nM+ARP2/3	3133	3261.5	3466.75	3708.25	3943	4195.5	4470.75	4756.75	5055.75	5386.25	5688	6025.75	6357.5	6697.25	7056.25	7397	7731.25	8079.25	8385.25	8731.75	9033	9356.25	9691.75	9992.5	10305	10599.8	10912.5	11193.2	11445.8	11716.8	12001.2	12254.5	12471.5	12798.5	12925.5	13103.2	13310.5	13515.5	13707	13889.5	14015	14252.5	14440.5	14579	14792.8	14933.8	15117.5	15285.2
	Actin+ARP2/3+WASP (VCA)	3404	3534	3700.5	3897	4156	4427	4714	5021.5	5314	5629.5	5974.5	6342.25	6691.25	7018.75	7363.75	7725.5	8087	8378	8757.25	9098.25	9447.75	9768.75	10086	10423	10721.2	11023.2	11319.5	11643	11860.2	12125.8	12372	12688.2	12855.2	13120.5	13315.5	13488.2	13714	13853	14071.8	14283.2	14430	14597.8	14770	14957.2	15094.2	15204	15447	15570.5
Fold change
	Average	1	0.980001	1.0284	1.09066	1.10298	1.17128	1.18822	1.2443	1.29931	1.33888	1.39194	1.4594	1.49559	1.56653	1.65188	1.66569	1.72434	1.7802	1.8163	1.87835	1.92476	1.97831	2.01313	2.06404	2.11164	2.1509	2.18439	2.22787	2.26338	2.31382	2.34225	2.39018	2.42623	2.45578	2.49957	2.52244	2.58203	2.58679	2.64733	2.66015	2.69194	2.74207	2.75459	2.78143	2.82182	2.82039	2.83108	2.88196
2	Actin+ARP2/3	1	0.885516	0.957701	1.06383	1.01324	1.13596	1.09701	1.18414	1.26091	1.29321	1.35957	1.47841	1.506	1.63772	1.80645	1.76338	1.86593	1.96035	1.98859	2.0976	2.17767	2.26256	2.28397	2.38363	2.44864	2.51641	2.55407	2.62101	2.66837	2.76568	2.79456	2.8924	2.94182	2.97888	3.05801	3.07201	3.20149	3.16437	3.30974	3.29027	3.35028	3.46664	3.44988	3.49	3.57666	3.53659	3.53771	3.64855
1	Actin+ARP2/3	1	1.02988	1.06749	1.10823	1.14904	1.18658	1.22878	1.26529	1.30724	1.34382	1.38717	1.42125	1.45845	1.49573	1.53286	1.575	1.60966	1.64109	1.68032	1.71543	1.74295	1.78266	1.82222	1.84573	1.88872	1.908	1.94583	1.97998	2.00651	2.03415	2.06779	2.09251	2.12575	2.15114	2.18558	2.21679	2.23706	2.2707	2.28888	2.32303	2.34533	2.36333	2.39449	2.41937	2.44204	2.46132	2.47752	2.50456
3	Actin+ARP2/3	1	1.02461	1.06001	1.09993	1.14666	1.19132	1.23885	1.28347	1.32977	1.37962	1.42906	1.47855	1.52233	1.56614	1.61633	1.6587	1.69742	1.73916	1.77999	1.82202	1.85367	1.88971	1.93319	1.96276	1.99755	2.02829	2.05327	2.0826	2.11525	2.14164	2.1644	2.18562	2.21113	2.23731	2.25511	2.27851	2.30754	2.32531	2.34338	2.36715	2.38022	2.39625	2.41941	2.43493	2.44677	2.46326	2.47801	2.49276
	minus Actin	0	-0.0315844	-0.0156656	0.00797169	-0.0232805	0.00020402	-0.0272844	-0.0163784	-0.0105561	-0.0134352	-0.00917423	0.0124765	0.00398328	0.0312826	0.0712615	0.0447635	0.0607325	0.0765981	0.0747178	0.0991072	0.105116	0.130846	0.131094	0.147828	0.160631	0.171323	0.177946	0.190134	0.199618	0.225828	0.22669	0.24968	0.260291	0.265394	0.287586	0.285248	0.323704	0.307326	0.349251	0.339077	0.359821	0.384867	0.381162	0.387657	0.419493	0.404621	0.399932	0.430894
	Average	1	1.04153	1.10272	1.17254	1.24501	1.31983	1.40362	1.48837	1.57578	1.67035	1.75981	1.85661	1.95311	2.05211	2.15283	2.25033	2.34973	2.45237	2.55097	2.65268	2.7446	2.84361	2.94557	3.03538	3.13514	3.22836	3.32468	3.40968	3.48479	3.57729	3.66233	3.73797	3.81613	3.89873	3.96175	4.02678	4.09378	4.15849	4.22344	4.27975	4.33113	4.39963	4.46637	4.52676	4.5884	4.63949	4.69799	4.75483
3	Actin+ERK3+ARP2/3	1	1.04102	1.10653	1.18361	1.25854	1.33913	1.42699	1.51827	1.61371	1.7192	1.81551	1.92332	2.02921	2.13765	2.25223	2.361	2.46768	2.57876	2.67643	2.78703	2.88318	2.98635	3.09344	3.18944	3.28918	3.38326	3.48308	3.57269	3.65329	3.73979	3.83059	3.91143	3.98069	4.08506	4.1256	4.18233	4.24848	4.31392	4.37504	4.43329	4.47335	4.54915	4.60916	4.65337	4.72159	4.7666	4.82525	4.87879
2	Actin+ERK3 4,8nM+ARP2/3	1	1.04417	1.11508	1.19	1.27131	1.35384	1.44806	1.54041	1.63815	1.73573	1.83322	1.93596	2.04155	2.14747	2.24677	2.34697	2.4524	2.55676	2.66841	2.76853	2.86112	2.96557	3.06789	3.155	3.25822	3.3495	3.44193	3.52707	3.60093	3.69475	3.77605	3.84173	3.92647	3.99485	4.06928	4.13905	4.21037	4.27065	4.34149	4.38017	4.43285	4.49452	4.5656	4.62531	4.6833	4.73851	4.79985	4.84549
4	Actin+ARP2/3+ERK3	1	1.03941	1.08655	1.14402	1.20519	1.26651	1.3358	1.40643	1.47548	1.55612	1.6307	1.71055	1.78859	1.8712	1.95948	2.04304	2.12912	2.22158	2.30806	2.40249	2.48952	2.57891	2.67539	2.76171	2.85803	2.95231	3.04903	3.12928	3.20014	3.29734	3.38034	3.46074	3.54123	3.61627	3.69037	3.75895	3.82248	3.8909	3.95381	4.02578	4.08718	4.15521	4.22434	4.30159	4.36032	4.41337	4.46886	4.5402
	minus Actin	0	0.0299467	0.0586555	0.0898515	0.11875	0.148748	0.188116	0.227691	0.265917	0.318032	0.3587	0.409682	0.461504	0.516857	0.572212	0.629403	0.686129	0.748769	0.809386	0.873438	0.924955	0.996146	1.06354	1.11917	1.18414	1.24878	1.31824	1.37195	1.42103	1.4893	1.54677	1.59747	1.65019	1.70834	1.74977	1.78959	1.83545	1.87902	1.92536	1.95868	1.999	2.04242	2.09293	2.13298	2.18608	2.22372	2.26684	2.30377
	Average	1	1.01159	1.04407	1.08269	1.12626	1.17108	1.2155	1.26068	1.30986	1.35232	1.40111	1.44692	1.49161	1.53525	1.58062	1.62093	1.6636	1.7036	1.74158	1.77924	1.81965	1.84746	1.88203	1.91621	1.95101	1.97958	2.00644	2.03773	2.06376	2.08799	2.11556	2.1405	2.16594	2.19038	2.21198	2.23719	2.25833	2.27947	2.29808	2.32107	2.33212	2.3572	2.37343	2.39378	2.40233	2.41577	2.43115	2.45106
Rep3	Actin	1	1.00244	1.03556	1.07899	1.1235	1.17128	1.21766	1.26628	1.31673	1.36274	1.41356	1.46331	1.50694	1.54738	1.59393	1.63417	1.67502	1.71496	1.75981	1.79144	1.83432	1.85882	1.89502	1.93462	1.96166	1.99549	2.01608	2.0477	2.07176	2.0948	2.12344	2.14909	2.1705	2.1878	2.21145	2.23869	2.25695	2.27198	2.3016	2.31897	2.31968	2.35205	2.36125	2.37974	2.387	2.39864	2.41075	2.42785
Rep2	Actin	1	1.02397	1.05768	1.0923	1.13366	1.173	1.21659	1.25586	1.30501	1.34173	1.38414	1.4254	1.46941	1.50788	1.5505	1.58596	1.62928	1.66529	1.70215	1.73673	1.77418	1.81279	1.84224	1.87235	1.91046	1.93509	1.96496	1.9993	2.02592	2.05226	2.07707	2.09904	2.12838	2.15801	2.17614	2.20496	2.22554	2.25376	2.26051	2.28608	2.30547	2.328	2.34714	2.37848	2.38337	2.39375	2.41219	2.43231
1Rep1	Actin	1	1.00835	1.03896	1.07679	1.12162	1.16897	1.21225	1.2599	1.30785	1.35249	1.40563	1.45207	1.49848	1.55049	1.59742	1.64266	1.68651	1.73055	1.76278	1.80956	1.85044	1.87078	1.90884	1.94167	1.9809	2.00816	2.03828	2.06619	2.0936	2.11692	2.14618	2.17337	2.19894	2.22534	2.24835	2.26791	2.2925	2.31266	2.33214	2.35817	2.37122	2.39156	2.41191	2.42311	2.43661	2.45493	2.4705	2.49302
		1	1.02198	1.05868	1.09928	1.14363	1.1872	1.23026	1.27899	1.32429	1.36799	1.41506	1.45769	1.50282	1.546	1.58857	1.63534	1.67488	1.71416	1.75411	1.79473	1.82508	1.86179	1.90237	1.93105	1.96754	1.99574	2.027	2.05849	2.09064	2.11788	2.14615	2.17239	2.20091	2.22939	2.2546	2.28411	2.30623	2.33093	2.35136	2.37436	2.39894	2.41721	2.4374	2.45764	2.4763	2.49454	2.51304	2.53308
3	Actin+ERK3	1	1.0219	1.05668	1.09922	1.14656	1.19191	1.23508	1.2872	1.33565	1.37955	1.42914	1.47658	1.52655	1.57361	1.62036	1.66963	1.70929	1.75578	1.79742	1.83496	1.86841	1.90408	1.94215	1.96993	2.00706	2.03874	2.06763	2.10301	2.13533	2.16074	2.18716	2.21425	2.24166	2.27252	2.29632	2.32844	2.34977	2.3718	2.39351	2.41183	2.43876	2.46016	2.47971	2.49528	2.51272	2.52798	2.54738	2.5708
2	Actin+ERK3	1	1.01415	1.05186	1.09038	1.13529	1.18312	1.22691	1.28448	1.32999	1.38061	1.42888	1.47525	1.52345	1.56866	1.61248	1.66139	1.7057	1.74561	1.78459	1.83379	1.86388	1.89864	1.94273	1.97749	2.00683	2.04047	2.06754	2.09247	2.13007	2.15874	2.18349	2.21041	2.23531	2.2645	2.2819	2.3071	2.33185	2.35029	2.37169	2.38823	2.41272	2.42813	2.43799	2.45826	2.47413	2.49433	2.51422	2.52389
1	Actin+ERK3	1	1.02988	1.06749	1.10823	1.14904	1.18658	1.22878	1.26529	1.30724	1.34382	1.38717	1.42125	1.45845	1.49573	1.53286	1.575	1.60966	1.64109	1.68032	1.71543	1.74295	1.78266	1.82222	1.84573	1.88872	1.908	1.94583	1.97998	2.00651	2.03415	2.06779	2.09251	2.12575	2.15114	2.18558	2.21679	2.23706	2.2707	2.28888	2.32303	2.34533	2.36333	2.39449	2.41937	2.44204	2.46132	2.47752	2.50456
	minus Actin	0	0.0103914	0.0146106	0.0165831	0.0173705	0.0161221	0.0147565	0.0183104	0.01443	0.0156747	0.0139542	0.0107681	0.0112067	0.0107505	0.00795024	0.0144095	0.0112811	0.01056	0.012531	0.0154829	0.00543396	0.0143293	0.0203332	0.0148395	0.0165293	0.0161554	0.0205566	0.0207579	0.0268738	0.0298827	0.0305876	0.0318952	0.0349656	0.0390037	0.0426189	0.0469211	0.047899	0.0514621	0.0532749	0.0532899	0.066814	0.060001	0.0639675	0.0638623	0.0739691	0.0787713	0.0818923	0.0820214
		1	1.04041	1.08813	1.14633	1.20967	1.27902	1.35134	1.42818	1.49666	1.57502	1.65555	1.73763	1.81834	1.8994	1.98761	2.07105	2.15626	2.23607	2.32786	2.41311	2.50043	2.58491	2.66649	2.7546	2.83224	2.91681	2.99505	3.07859	3.14892	3.22683	3.29587	3.37674	3.4421	3.51385	3.58114	3.63784	3.70181	3.76201	3.82424	3.88138	3.94169	3.99779	4.05071	4.11194	4.16695	4.21579	4.27954	4.32968
1	Actin+ARP2/3+WASP (VCA)	1	1.03819	1.0871	1.14483	1.22092	1.30053	1.38484	1.47518	1.5611	1.65379	1.75514	1.86318	1.9657	2.06191	2.16326	2.26954	2.37573	2.46122	2.57264	2.67281	2.77548	2.86979	2.96298	3.06199	3.1496	3.23832	3.32535	3.42039	3.48421	3.56221	3.63455	3.72745	3.77651	3.85444	3.91172	3.96247	4.02879	4.06962	4.13389	4.19602	4.23913	4.28841	4.33901	4.39402	4.43427	4.46651	4.5379	4.57418
3	Actin+ARP2/3+WASP (VCA)	1	1.04797	1.08023	1.13339	1.18371	1.24009	1.30174	1.36997	1.42321	1.48611	1.55119	1.6176	1.68553	1.75896	1.83816	1.91056	1.98698	2.0607	2.14838	2.2278	2.31	2.39381	2.47009	2.55858	2.62637	2.71362	2.78975	2.87026	2.94266	3.03196	3.09726	3.17822	3.25713	3.32448	3.39944	3.46343	3.52406	3.59361	3.65219	3.70989	3.79165	3.84906	3.90537	3.96885	4.02816	4.09558	4.1459	4.20974
4	Actin+ARP2/3+WASP (VCA)	1	1.03506	1.09707	1.16077	1.22439	1.29643	1.36743	1.43939	1.50566	1.58516	1.66033	1.73213	1.80377	1.87734	1.96141	2.03305	2.10606	2.18628	2.26258	2.33871	2.4158	2.49114	2.56639	2.64324	2.72074	2.79848	2.87004	2.94513	3.0199	3.08632	3.1558	3.22455	3.29266	3.36262	3.43225	3.48761	3.55259	3.62278	3.68664	3.73823	3.7943	3.85592	3.90774	3.97296	4.03843	4.08528	4.15483	4.20513
2	Actin+ARP2/3+WASP (VCA)	1	1.03432	1.0999	1.15848	1.22285	1.2956	1.36287	1.43337	1.49936	1.57372	1.653	1.72269	1.7927	1.86279	1.94038	2.01305	2.08532	2.16226	2.23937	2.32154	2.39558	2.47704	2.54939	2.62826	2.70085	2.77449	2.85047	2.91653	2.99976	3.06429	3.14051	3.21157	3.2732	3.34918	3.41089	3.4913	3.55237	3.61851	3.68402	3.72865	3.79633	3.87335	3.9266	3.99452	4.04206	4.11215	4.18635	4.22817
	minus Actin	0	0.028822	0.0440684	0.0636381	0.0834096	0.107937	0.135836	0.1675	0.186793	0.222699	0.254444	0.290709	0.326726	0.364154	0.406995	0.450119	0.492655	0.532468	0.586285	0.633865	0.680783	0.737448	0.784453	0.838389	0.881231	0.937225	0.988603	1.04086	1.08516	1.13884	1.18031	1.23624	1.27616	1.32346	1.36916	1.40065	1.44348	1.48254	1.52616	1.56031	1.60957	1.64059	1.67728	1.71817	1.76462	1.80002	1.8484	1.87862
[truncated: 149 more columns]

## Sheet: originals from Tecan
Method name: Actin polymerization (Modified)
Application: SparkControl				V3.1
Device: Spark				Serial number: 2007011179
Firmware:				LUM:V5.2.4|ABS:V4.3.2|ABS_MEX:V5.1.1|MTP:V14.2.11|FLUOR:V5.1.4|FLUOR_BOTTOM:V5.0.2|PODI:V1.11.2
Date:				2021-02-09
Time:				2:33 PM
System				CBUMAINZ-HP
User				CBUMainz-HP\User
Plate				[GRE96fb_chimney] - Greiner 96 Flat Black Cat. No.: 655079/655086/655077/655076
Lid lifter				No lid
Humidity Cassette				No humidity cassette
Smooth mode				Not selected
List of actions in this measurement script:
Plate
	Shaking
	Kinetic
		Fluorescence Top Reading				Actin
Name				GRE96fb_chimney
Plate layout
Plate area				A1-G2;H1
Start Time				2021-02-09 11:57:11
Shaking (Orbital) Duration [s]				5
Shaking (Orbital) Position				Current
Shaking (Orbital) Amplitude [mm]				1
Shaking (Orbital) Frequency [rpm]				510
End Time				2021-02-09 11:57:16
Mode	Kinetic
Kinetic cycles				240
Interval time [hhmmss]				00:00:30
Mode	Fluorescence Top Reading
Name	Actin
Excitation				Filter
Excitation wavelength [nm]				360
Excitation bandwidth [nm]				35
Emission				Filter
Emission wavelength [nm]				415
Emission bandwidth [nm]				20
Gain Manual				50
Mirror				Automatic (50% Mirror)
Number of flashes				30
Integration time [µs]				40
Lag time [µs]				0
Settle time [ms]				0
Z-Position [μm]				17500
Z-Position mode				Manual
Multiple Reads per Well (Circle (filled))				2 x 2
Multiple Reads per Well (Border) [μm]				500
Part of Plate				A1-G2;H1
Start Time				2021-02-09 11:57:22
Actin
1;1	1;2
2;1	2;2
Cycles / Well
	1	2	3	4	5	6	7	8	9	10	11	12	13	14	15	16	17	18	19	20	21	22	23	24	25	26	27	28	29	30	31	32	33	34	35	36	37	38	39	40	41	42	43	44	45	46	47	48	49
Time [s]	0	39.661	78.83	117.885	156.986	196.095	235.134	274.274	313.473	352.783	391.898	430.973	470.1	509.201	548.362	587.563	626.734	665.886	704.921	744.142	783.271	822.381	861.489	900.614	939.754	978.828	1017.94	1057.08	1096.25	1135.41	1174.43	1213.49	1252.61	1291.75	1330.86	1369.95	1409.11	1448.17	1487.28	1526.44	1565.64	1604.77	1643.89	1682.94	1722.01	1761.02	1800.11	1839.16	1878.23
Temp. [°C]	25.7	25.7	25.6	25.6	25.6	25.7	25.7	25.7	25.8	25.8	25.8	25.9	25.9	25.9	25.9	25.9	26	26	26.1	26.1	26.1	26.2	26.2	26.3	26.3	26.3	26.3	26.3	26.2	26.2	26.3	26.3	26.3	26.4	26.3	26.4	26.4	26.3	26.4	26.3	26.3	26.3	26.4	26.3	26.4	26.4	26.5	26.5	26.4
Mean	7207.5	7272.5	7456.25	7705.75	7996.5	8305.5	8595.5	8911	9228.25	9524.75	9873.25	10181.8	10490.2	10835	11145.5	11447.8	11735.8	12029.5	12242.5	12552.2	12824.8	12957.2	13209.8	13424.5	13684.8	13865.5	14066.5	14251.8	14430.5	14588	14781.2	14960.8	15131	15304.2	15460.2	15590	15753.5	15890	16016	16189	16277	16411.8	16546	16620	16710	16831.8	16935	17086.2	17121.2
StDev	342.139	365.629	370.106	409.559	403.12	407.066	432.227	446.834	489.732	467.312	471.146	519.573	530.722	513.601	490.715	511.446	554.115	532.309	605.493	578.706	570.627	662.009	733.158	708.871	666.071	735.659	742.739	762.338	764.546	723.397	752.325	762.735	776.148	810.697	803.505	806.948	784.276	885.445	821.545	877.923	835.666	864.471	869.324	851.836	889.603	820.815	855.479	851.418	905.557
1;1	7003	7075	7247	7444	7704	8006	8262	8570	8856	9142	9493	9741	10048	10495	10824	11157	11431	11720	11791	12238	12497	12370	12573	12797	13192	13197	13432	13566	13741	13963	14062	14283	14394	14556	14690	14833	15045	15048	15296	15346	15456	15626	15742	15794	15867	16063	16058	16323	16315
1;2	7459	7540	7714	7972	8295	8597	8923	9235	9570	9827	10155	10530	10901	11140	11471	11788	12038	12356	12572	12911	13159	13367	13658	13875	14091	14410	14513	14749	14953	15081	15289	15483	15624	15772	15970	16089	16228	16426	16456	16727	16782	16934	17033	17139	17162	17223	17379	17490	17524
2;1	6834	6858	7045	7277	7598	7908	8185	8485	8762	9110	9455	9733	10016	10313	10637	10883	11130	11452	11679	11907	12206	12419	12601	12844	13050	13267	13441	13636	13810	13973	14216	14331	14549	14685	14866	14978	15132	15234	15358	15546	15688	15732	15888	16006	16074	16244	16398	16440	16438
2;2	7534	7617	7819	8130	8389	8711	9012	9354	9725	10020	10390	10723	10996	11392	11650	11963	12344	12590	12928	13153	13437	13673	14007	14182	14406	14588	14880	15056	15218	15335	15558	15746	15957	16204	16315	16460	16609	16852	16954	17137	17182	17355	17521	17541	17737	17797	17905	18092	18208
Cycles / Well
	1	2	3	4	5	6	7	8	9	10	11	12	13	14	15	16	17	18	19	20	21	22	23	24	25	26	27	28	29	30	31	32	33	34	35	36	37	38	39	40	41	42	43	44	45	46	47	48	49
Time [s]	0	39.661	78.83	117.885	156.986	196.095	235.134	274.274	313.473	352.783	391.898	430.973	470.1	509.201	548.362	587.563	626.734	665.886	704.921	744.142	783.271	822.381	861.489	900.614	939.754	978.828	1017.94	1057.08	1096.25	1135.41	1174.43	1213.49	1252.61	1291.75	1330.86	1369.95	1409.11	1448.17	1487.28	1526.44	1565.64	1604.77	1643.89	1682.94	1722.01	1761.02	1800.11	1839.16	1878.23
Temp. [°C]	25.7	25.7	25.7	25.6	25.6	25.7	25.7	25.7	25.8	25.8	25.8	25.9	25.9	25.9	25.9	26	26	26	26.1	26.1	26.1	26.2	26.2	26.3	26.3	26.3	26.3	26.3	26.3	26.3	26.3	26.3	26.4	26.4	26.3	26.4	26.4	26.3	26.4	26.3	26.4	26.3	26.4	26.3	26.4	26.5	26.5	26.5	26.4
Mean	559.75	569.25	549.5	547.5	540.25	534.5	536.75	535.5	534	533.75	529	528.75	528.75	527.75	526.25	527.75	524.25	525.25	524	522.75	523.5	520.75	520.25	516.75	516.25	515.75	516.5	516.25	512.75	515.25	514	512.75	513	510.75	513.75	513.5	513.5	516	512.5	512.5	513.75	513.25	512.25	511.75	512	512	511.75	513.25	512.75
StDev	583.261	592.045	568.93	576.695	586.957	566.677	557.113	572.054	553.641	569.773	566.506	546.782	555.744	543.824	567.359	558.346	569.313	553.989	544.765	551.201	552.078	568.246	549.56	541.751	554.415	560.736	529.079	550.769	545.18	546.041	546.924	552.586	564.592	564.722	556.473	531.762	556.58	538.09	550.758	529.459	528.415	538.61	534.368	542.95	522.584	542.74	525.329	529.141	536.672
1;1	7538	7450	7442	7446	7414	7406	7445	7398	7411	7387	7382	7390	7399	7356	7328	7363	7386	7344	7365	7340	7367	7313	7348	7357	7291	7289	7322	7295	7312	7273	7306	7277	7275	7282	7293	7275	7289	7270	7268	7287	7248	7232	7246	7247	7258	7255	7242	7284	7216
1;2	8503	8380	8322	8315	8294	8282	8271	8296	8248	8257	8253	8244	8240	8212	8239	8207	8259	8219	8195	8210	8202	8222	8159	8212	8184	8160	8136	8173	8172	8142	8150	8147	8135	8134	8160	8121	8156	8111	8149	8095	8090	8103	8108	8102	8073	8098	8056	8085	8037
2;1	7252	7106	7104	7066	7040	7063	7081	7072	7075	7052	7050	7094	7055	7068	7060	7061	7039	7056	7052	7069	7031	7027	7015	7053	7024	6996	7051	7037	7046	7028	7025	7014	6990	6992	7012	7025	7017	7000	6995	6996	7009	7003	7008	7005	7003	6976	6970	6969	6970
2;2	8228	8139	8113	8096	8105	8064	8099	8076	8081	8082	8066	8071	8059	8034	8061	8097	8054	8039	8044	8057	8033	8024	8041	8000	7995	8011	8022	8019	8025	8009	8025	8012	8039	8049	8021	7975	8031	7973	7964	7966	7956	7958	7953	7993	7954	7961	7925	7933	7973
Cycles / Well
	1	2	3	4	5	6	7	8	9	10	11	12	13	14	15	16	17	18	19	20	21	22	23	24	25	26	27	28	29	30	31	32	33	34	35	36	37	38	39	40	41	42	43	44	45	46	47	48	49
Time [s]	0	39.661	78.83	117.885	156.986	196.095	235.134	274.274	313.473	352.783	391.898	430.973	470.1	509.201	548.362	587.563	626.734	665.886	704.921	744.142	783.271	822.381	861.489	900.614	939.754	978.828	1017.94	1057.08	1096.25	1135.41	1174.43	1213.49	1252.61	1291.75	1330.86	1369.95	1409.11	1448.17	1487.28	1526.44	1565.64	1604.77	1643.89	1682.94	1722.01	1761.02	1800.11	1839.16	1878.23
Temp. [°C]	25.7	25.7	25.7	25.6	25.6	25.7	25.7	25.7	25.8	25.8	25.8	25.9	25.9	25.9	25.9	26	26	26	26.1	26.1	26.1	26.2	26.2	26.3	26.3	26.3	26.3	26.3	26.2	26.3	26.3	26.3	26.4	26.4	26.3	26.4	26.4	26.3	26.4	26.3	26.3	26.3	26.4	26.3	26.4	26.5	26.5	26.5	26.4
Mean	7256.25	7360.5	7593.25	7849.25	8142.75	8457.25	8752.75	9137	9440.25	9779	10097.5	10407.8	10730.5	11032.2	11324.2	11653.2	11946.5	12214.8	12474.5	12802.8	13005	13235	13529.8	13759	13955	14179.8	14361.8	14528.5	14776.8	14971.2	15135.8	15314.8	15481.8	15675	15794.5	15963	16128.8	16254.8	16394.5	16505.2	16670.5	16773.2	16838.2	16973.5	17080	17215.2	17348.2	17414.5	17480.8
StDev	436.783	477.238	462.078	498.623	522.637	524.22	534.186	565.434	582.558	612.089	601.302	616.682	646.742	680.631	676.117	712.062	737.156	721.363	754.95	804.549	800.467	828.425	882.468	863.297	880.29	860.332	893.38	937.94	905.492	922.268	984.609	945.886	940.699	982.118	957.443	987.952	1025.26	1005.35	1013.41	1020.88	1048.41	994.021	1056.06	996.295	1029.21	1012.47	1063.51	1026.69	1091.82
1;1	6848	6926	7156	7400	7645	7970	8227	8610	8883	9191	9525	9796	10146	10375	10680	10965	11285	11502	11749	12060	12206	12429	12686	12965	13095	13304	13492	13618	13874	14077	14170	14370	14525	14723	14778	15012	15106	15248	15320	15472	15573	15745	15751	15968	16018	16200	16255	16395	16362
1;2	7597	7732	7943	8202	8531	8848	9138	9583	9883	10264	10532	10888	11157	11503	11785	12105	12434	12692	12938	13358	13502	13786	14157	14314	14584	14755	14951	15114	15377	15531	15758	15902	16123	16292	16406	16561	16688	16883	17101	17195	17306	17414	17469	17546	17750	17883	17984	18008	18041
2;1	6911	6971	7235	7442	7742	8042	8364	8688	8995	9312	9638	9960	10210	10526	10813	11133	11348	11701	11922	12167	12452	12630	12861	13082	13308	13596	13711	13850	14141	14307	14433	14662	14840	14962	15203	15244	15442	15563	15754	15804	16012	16124	16155	16311	16403	16512	16658	16711	16797
2;2	7669	7813	8039	8353	8653	8969	9282	9667	10000	10349	10695	10987	11409	11725	12019	12410	12719	12964	13289	13626	13860	14095	14415	14675	14833	15064	15293	15532	15715	15970	16182	16325	16439	16723	16791	17035	17279	17325	17403	17550	17791	17810	17978	18069	18149	18266	18496	18544	18723
Cycles / Well
	1	2	3	4	5	6	7	8	9	10	11	12	13	14	15	16	17	18	19	20	21	22	23	24	25	26	27	28	29	30	31	32	33	34	35	36	37	38	39	40	41	42	43	44	45	46	47	48	49
Time [s]	0	39.661	78.83	117.885	156.986	196.095	235.134	274.274	313.473	352.783	391.898	430.973	470.1	509.201	548.362	587.563	626.734	665.886	704.921	744.142	783.271	822.381	861.489	900.614	939.754	978.828	1017.94	1057.08	1096.25	1135.41	1174.43	1213.49	1252.61	1291.75	1330.86	1369.95	1409.11	1448.17	1487.28	1526.44	1565.64	1604.77	1643.89	1682.94	1722.01	1761.02	1800.11	1839.16	1878.23
Temp. [°C]	25.7	25.6	25.6	25.6	25.7	25.6	25.7	25.7	25.8	25.8	25.8	25.8	25.8	25.9	25.9	26	26	26.1	26.1	26.1	26.1	26.2	26.2	26.3	26.2	26.3	26.3	26.3	26.2	26.3	26.3	26.3	26.4	26.3	26.4	26.3	26.3	26.4	26.3	26.3	26.3	26.3	26.3	26.3	26.4	26.5	26.5	26.5	26.5
Mean	7716	7897	8118.5	8364.25	8653	8928.75	9243	9522.75	9873	10135.5	10434.2	10729.2	11044.2	11318.5	11622	11877.2	12183.8	12442.5	12705	12951.2	13220	13493.5	13703.8	13915.8	14188	14363.8	14578.2	14823.8	15010.8	15201.8	15378	15534	15744.2	15954	16086.8	16292.8	16440	16644.5	16689.2	16872.2	17012.2	17173	17309	17532.8	17568	17642.2	17774	17919.5	18087.5
StDev	556.118	569.639	568.691	571.187	606.775	632.711	674.085	658.564	707.578	705.185	732.745	796.357	788.796	825.691	855.928	861.13	906.216	897.172	931.484	954.57	987.766	990.919	996.866	982.09	1017.5	998.657	1049.71	1041.98	1100.12	1100.8	1108.47	1082.42	1114.83	1173.37	1141.52	1193.5	1190.16	1221.91	1177.62	1195.84	1249.62	1227.19	1262.04	1172.14	1225.61	1286.71	1290.95	1271.48	1310.67
1;1	7487	7635	7878	8128	8385	8643	8927	9226	9500	9822	10065	10341	10609	10886	11154	11460	11694	11994	12238	12410	12697	12964	13152	13390	13615	13790	14009	14282	14384	14567	14753	14971	15148	15313	15477	15632	15791	15968	16016	16247	16327	16605	16665	16841	16868	16992	17094	17221	17437
1;2	8396	8599	8803	9039	9395	9681	10064	10320	10715	10958	11295	11673	11967	12300	12651	12925	13254	13497	13777	14077	14415	14646	14883	15055	15360	15524	15816	16002	16236	16450	16685	16732	16984	17258	17390	17685	17789	18075	18055	18238	18407	18522	18692	18878	18934	19073	19163	19351	19513
2;1	7096	7280	7481	7714	7986	8224	8510	8797	9117	9339	9635	9857	10206	10434	10724	10948	11219	11462	11677	11951	12177	12426	12652	12857	13106	13314	13461	13677	13829	14033	14214	14333	14520	14674	14846	15024	15151	15348	15448	15564	15653	15765	15896	16306	16253	16205	16334	16542	16605
2;2	7885	8074	8312	8576	8846	9167	9471	9748	10160	10423	10742	11046	11395	11654	11959	12176	12568	12817	13128	13367	13591	13938	14128	14361	14671	14827	15027	15334	15594	15757	15860	16100	16325	16571	16634	16830	17029	17187	17238	17440	17662	17800	17983	18106	18217	18299	18505	18564	18795
Cycles / Well
	1	2	3	4	5	6	7	8	9	10	11	12	13	14	15	16	17	18	19	20	21	22	23	24	25	26	27	28	29	30	31	32	33	34	35	36	37	38	39	40	41	42	43	44	45	46	47	48	49
Time [s]	0	39.661	78.83	117.885	156.986	196.095	235.134	274.274	313.473	352.783	391.898	430.973	470.1	509.201	548.362	587.563	626.734	665.886	704.921	744.142	783.271	822.381	861.489	900.614	939.754	978.828	1017.94	1057.08	1096.25	1135.41	1174.43	1213.49	1252.61	1291.75	1330.86	1369.95	1409.11	1448.17	1487.28	1526.44	1565.64	1604.77	1643.89	1682.94	1722.01	1761.02	1800.11	1839.16	1878.23
Temp. [°C]	25.7	25.6	25.6	25.6	25.7	25.6	25.7	25.7	25.8	25.8	25.8	25.8	25.8	25.9	25.9	26	26	26.1	26.1	26.1	26.1	26.2	26.2	26.3	26.2	26.3	26.3	26.3	26.2	26.3	26.3	26.3	26.4	26.3	26.4	26.3	26.3	26.4	26.3	26.3	26.3	26.3	26.3	26.3	26.4	26.5	26.5	26.5	26.5
Mean	7716	7897	8118.5	8364.25	8653	8928.75	9243	9522.75	9873	10135.5	10434.2	10729.2	11044.2	11318.5	11622	11877.2	12183.8	12442.5	12705	12951.2	13220	13493.5	13703.8	13915.8	14188	14363.8	14578.2	14823.8	15010.8	15201.8	15378	15534	15744.2	15954	16086.8	16292.8	16440	16644.5	16689.2	16872.2	17012.2	17173	17309	17532.8	17568	17642.2	17774	17919.5	18087.5
StDev	556.118	569.639	568.691	571.187	606.775	632.711	674.085	658.564	707.578	705.185	732.745	796.357	788.796	825.691	855.928	861.13	906.216	897.172	931.484	954.57	987.766	990.919	996.866	982.09	1017.5	998.657	1049.71	1041.98	1100.12	1100.8	1108.47	1082.42	1114.83	1173.37	1141.52	1193.5	1190.16	1221.91	1177.62	1195.84	1249.62	1227.19	1262.04	1172.14	1225.61	1286.71	1290.95	1271.48	1310.67
1;1	7487	7635	7878	8128	8385	8643	8927	9226	9500	9822	10065	10341	10609	10886	11154	11460	11694	11994	12238	12410	12697	12964	13152	13390	13615	13790	14009	14282	14384	14567	14753	14971	15148	15313	15477	15632	15791	15968	16016	16247	16327	16605	16665	16841	16868	16992	17094	17221	17437
1;2	8396	8599	8803	9039	9395	9681	10064	10320	10715	10958	11295	11673	11967	12300	12651	12925	13254	13497	13777	14077	14415	14646	14883	15055	15360	15524	15816	16002	16236	16450	16685	16732	16984	17258	17390	17685	17789	18075	18055	18238	18407	18522	18692	18878	18934	19073	19163	19351	19513
2;1	7096	7280	7481	7714	7986	8224	8510	8797	9117	9339	9635	9857	10206	10434	10724	10948	11219	11462	11677	11951	12177	12426	12652	12857	13106	13314	13461	13677	13829	14033	14214	14333	14520	14674	14846	15024	15151	15348	15448	15564	15653	15765	15896	16306	16253	16205	16334	16542	16605
2;2	7885	8074	8312	8576	8846	9167	9471	9748	10160	10423	10742	11046	11395	11654	11959	12176	12568	12817	13128	13367	13591	13938	14128	14361	14671	14827	15027	15334	15594	15757	15860	16100	16325	16571	16634	16830	17029	17187	17238	17440	17662	17800	17983	18106	18217	18299	18505	18564	18795
Cycles / Well
	1	2	3	4	5	6	7	8	9	10	11	12	13	14	15	16	17	18	19	20	21	22	23	24	25	26	27	28	29	30	31	32	33	34	35	36	37	38	39	40	41	42	43	44	45	46	47	48	49
Time [s]	0	39.661	78.83	117.885	156.986	196.095	235.134	274.274	313.473	352.783	391.898	430.973	470.1	509.201	548.362	587.563	626.734	665.886	704.921	744.142	783.271	822.381	861.489	900.614	939.754	978.828	1017.94	1057.08	1096.25	1135.41	1174.43	1213.49	1252.61	1291.75	1330.86	1369.95	1409.11	1448.17	1487.28	1526.44	1565.64	1604.77	1643.89	1682.94	1722.01	1761.02	1800.11	1839.16	1878.23
Temp. [°C]	25.7	25.7	25.7	25.6	25.6	25.7	25.7	25.7	25.8	25.8	25.8	25.9	25.9	25.9	25.9	26	26	26.1	26.1	26.1	26.1	26.2	26.2	26.3	26.3	26.3	26.3	26.3	26.3	26.3	26.3	26.3	26.4	26.4	26.3	26.4	26.4	26.3	26.4	26.3	26.3	26.3	26.4	26.3	26.4	26.5	26.5	26.5	26.4
Mean	8017.25	8210.25	8454.5	8750.25	9091.5	9418.75	9775.5	10107	10450.8	10822.2	11186.2	11555	11881.5	12207.2	12580	12897.5	13182.8	13495	13798.2	14110.5	14347.2	14613.2	14937	15154	15413	15641.8	15828.8	16047.2	16287.2	16486.5	16655	16812	17002.5	17195.5	17331.2	17505.5	17722	17857	17988.2	18165.5	18264.2	18383.2	18555	18670.2	18758.8	18881.8	18991.5	19103	19236.8
StDev	499.609	519.912	533.124	531.437	592.182	567.005	587.395	617.016	598.835	589.882	630.716	639.918	619.357	635.478	701.276	684.79	717.183	715.995	758.349	731.127	763.284	766.454	794.634	832.748	800.92	850.537	863.929	931.29	925.842	893.124	953.438	985.154	968.06	1036.34	1008.35	1020.65	1060.63	1071.16	1105.06	1061.44	1117.87	1133.35	1093.61	1162.46	1136.17	1242.73	1179.96	1174.75	1204.01
1;1	7653	7841	8101	8405	8704	9043	9394	9735	10079	10451	10804	11190	11580	11853	12191	12491	12797	13186	13375	13766	13937	14152	14445	14656	14903	15091	15219	15368	15541	15792	15852	15957	16190	16247	16411	16617	16822	16936	17001	17216	17174	17321	17514	17633	17691	17738	17927	18018	18114
1;2	8497	8732	8954	9249	9643	9953	10265	10628	10921	11245	11583	12003	12311	12661	13063	13375	13694	13973	14316	14559	14843	15119	15487	15686	15886	16185	16372	16557	16827	17004	17293	17404	17604	17848	18017	18204	18450	18581	18758	18969	19086	19194	19359	19570	19656	19802	19868	20004	20190
2;1	7524	7692	7898	8190	8469	8827	9154	9432	9805	10194	10512	10846	11159	11496	11796	12151	12370	12636	12953	13259	13489	13787	14087	14257	14583	14759	14976	15166	15468	15673	15826	15996	16168	16381	16525	16644	16803	16943	17079	17284	17437	17500	17717	17700	17866	17886	18023	18162	18281
2;2	8395	8576	8865	9157	9550	9852	10289	10633	10998	11399	11846	12181	12476	12819	13270	13573	13870	14185	14549	14858	15120	15395	15729	16017	16280	16532	16748	17098	17313	17477	17649	17891	18048	18306	18372	18557	18813	18968	19115	19193	19360	19518	19630	19778	19822	20101	20148	20228	20362
Cycles / Well
	1	2	3	4	5	6	7	8	9	10	11	12	13	14	15	16	17	18	19	20	21	22	23	24	25	26	27	28	29	30	31	32	33	34	35	36	37	38	39	40	41	42	43	44	45	46	47	48	49
Time [s]	0	39.661	78.83	117.885	156.986	196.095	235.134	274.274	313.473	352.783	391.898	430.973	470.1	509.201	548.362	587.563	626.734	665.886	704.921	744.142	783.271	822.381	861.489	900.614	939.754	978.828	1017.94	1057.08	1096.25	1135.41	1174.43	1213.49	1252.61	1291.75	1330.86	1369.95	1409.11	1448.17	1487.28	1526.44	1565.64	1604.77	1643.89	1682.94	1722.01	1761.02	1800.11	1839.16	1878.23
Temp. [°C]	25.7	25.6	25.6	25.6	25.7	25.6	25.7	25.7	25.8	25.8	25.8	25.9	25.9	25.9	26	26	26	26.1	26.1	26.1	26.1	26.2	26.2	26.3	26.3	26.3	26.3	26.3	26.2	26.3	26.3	26.3	26.4	26.4	26.3	26.3	26.4	26.5	26.3	26.3	26.3	26.3	26.3	26.4	26.4	26.5	26.5	26.5	26.5
Mean	7353.25	7565.75	7801.5	8076.25	8346.25	8595.5	8884.5	9131.25	9414.75	9663	9952.75	10184	10436.8	10689	10939.8	11227.5	11459.5	11674	11939.2	12176.5	12364.2	12631.2	12899.5	13055.8	13347.2	13477.8	13735.5	13967.2	14144	14334.2	14561.5	14728.2	14954.2	15124.5	15361.5	15573.2	15711	15942	16062	16294	16446.8	16568.5	16779.2	16947.8	17102	17233	17342.8	17528	17699.8
StDev	602.746	592.286	592.983	590.123	590.436	620.88	640.802	662.103	650.499	681.888	692.232	736.933	755.308	721.347	746.216	780.245	838.284	812.668	861.265	862.96	870.998	936.025	948.488	925.285	956.882	976.205	991.413	981.552	986.883	1031.96	1020.61	1039.28	1058.76	1087.44	1082.02	1118.12	1124.24	1109.79	1148.65	1199.6	1222.87	1172.49	1212.76	1276.74	1315.26	1286.75	1305.89	1290.74	1260.75
1;1	7142	7299	7507	7805	8094	8313	8559	8797	9069	9269	9600	9798	10012	10298	10473	10791	10980	11212	11423	11704	11872	12076	12368	12526	12868	12929	13187	13356	13563	13690	13910	14047	14251	14454	14683	14841	14942	15201	15266	15426	15596	15778	15951	16091	16220	16312	16463	16655	16876
1;2	8057	8276	8513	8761	9064	9322	9637	9902	10156	10460	10732	11045	11297	11511	11799	12094	12413	12551	12890	13136	13329	13626	13861	14079	14363	14511	14777	15037	15200	15372	15621	15794	16074	16243	16491	16755	16832	17074	17276	17575	17742	17819	18071	18296	18518	18653	18754	18922	19089
2;1	6644	6909	7160	7413	7690	7899	8187	8406	8706	8950	9185	9387	9629	9908	10179	10383	10568	10791	11029	11236	11424	11626	11848	12061	12260	12407	12640	12942	13083	13236	13493	13651	13872	13966	14221	14422	14565	14801	14914	15129	15228	15382	15560	15649	15771	15989	16026	16229	16417
2;2	7570	7779	8026	8326	8537	8848	9155	9420	9728	9973	10294	10506	10809	11039	11308	11642	11877	12142	12415	12630	12832	13197	13521	13557	13898	14064	14338	14534	14730	15039	15222	15421	15620	15835	16051	16275	16505	16692	16792	17046	17221	17295	17535	17755	17899	17978	18128	18306	18417
	1	2	3	4	5	6	7	8	9	10	11	12	13	14	15	16	17	18	19	20	21	22	23	24	25	26	27	28	29	30	31	32	33	34	35	36	37	38	39	40	41	42	43	44	45	46	47	48	49
Time [s]	0	39.661	78.83	117.885	156.986	196.095	235.134	274.274	313.473	352.783	391.898	430.973	470.1	509.201	548.362	587.563	626.734	665.886	704.921	744.142	783.271	822.381	861.489	900.614	939.754	978.828	1017.94	1057.08	1096.25	1135.41	1174.43	1213.49	1252.61	1291.75	1330.86	1369.95	1409.11	1448.17	1487.28	1526.44	1565.64	1604.77	1643.89	1682.94	1722.01	1761.02	1800.11	1839.16	1878.23
Temp. [°C]	25.7	25.7	25.6	25.6	25.6	25.7	25.6	25.7	25.8	25.8	25.8	25.9	25.8	25.9	25.9	25.9	26	26.1	26.1	26.1	26.1	26.1	26.2	26.3	26.3	26.3	26.3	26.3	26.2	26.2	26.3	26.3	26.3	26.4	26.3	26.4	26.4	26.3	26.4	26.3	26.3	26.3	26.4	26.3	26.4	26.4	26.5	26.5	26.4
Mean	7928	7955.5	8179.75	8497.75	8818.5	9164.75	9508.75	9865.75	10236	10574.8	10944.5	11310.8	11632.2	11929.2	12270.8	12568.8	12866.2	13161.5	13490.8	13722.5	14039.2	14217	14483.2	14771.5	14970.2	15219	15371.5	15604.2	15778	15950.2	16160	16347.8	16505.8	16631	16808.2	17008.8	17143.2	17256.5	17471.2	17599.2	17605.8	17843.8	17910.5	18046.2	18100	18185.8	18274.8	18402.2	18538
StDev	567.09	425.833	458.216	449.022	512.261	523.069	544.835	585.294	604.093	636.143	638.245	694.29	741.35	697.136	714.049	747.746	783.388	811.083	793.05	806.646	864.413	824.714	881.374	885.333	905.637	876.579	878.535	883.882	918.664	843.83	913.199	893.939	921.537	916.51	931.897	949.668	940.826	971.421	978.486	962.434	1000.66	984.731	952.019	985.577	989.087	973.966	1014.66	996.361	996.911
1;1	7629	7621	7794	8149	8388	8708	9027	9324	9694	10006	10383	10754	11016	11301	11677	11902	12194	12439	12839	13038	13304	13458	13714	14015	14188	14468	14591	14817	14913	15182	15317	15549	15730	15790	16006	16195	16319	16373	16585	16711	16704	16956	17077	17222	17215	17272	17369	17497	17586
1;2	8483	8329	8577	8871	9254	9597	9972	10340	10713	11132	11476	11844	12282	12509	12857	13195	13566	13836	14120	14417	14849	14877	15166	15562	15696	15959	16059	16328	16573	16641	16829	17028	17241	17334	17527	17768	17826	18000	18231	18334	18360	18590	18643	18888	18888	18863	19086	19136	19200
2;1	7283	7554	7772	8071	8362	8716	9047	9396	9734	10042	10401	10670	10965	11351	11629	11941	12182	12480	12772	13010	13280	13551	13730	13995	14186	14452	14634	14862	15055	15259	15432	15604	15688	15891	16001	16180	16348	16464	16668	16828	16782	17033	17100	17164	17275	17431	17426	17592	17790
2;2	8317	8318	8576	8900	9270	9638	9989	10403	10803	11119	11518	11975	12266	12556	12920	13237	13523	13891	14232	14425	14724	14982	15323	15514	15811	15997	16202	16410	16571	16719	17062	17210	17364	17509	17699	17892	18080	18189	18401	18524	18577	18796	18822	18911	19022	19177	19218	19384	19576
	1	2	3	4	5	6	7	8	9	10	11	12	13	14	15	16	17	18	19	20	21	22	23	24	25	26	27	28	29	30	31	32	33	34	35	36	37	38	39	40	41	42	43	44	45	46	47	48	49
Time [s]	0	39.661	78.83	117.885	156.986	196.095	235.134	274.274	313.473	352.783	391.898	430.973	470.1	509.201	548.362	587.563	626.734	665.886	704.921	744.142	783.271	822.381	861.489	900.614	939.754	978.828	1017.94	1057.08	1096.25	1135.41	1174.43	1213.49	1252.61	1291.75	1330.86	1369.95	1409.11	1448.17	1487.28	1526.44	1565.64	1604.77	1643.89	1682.94	1722.01	1761.02	1800.11	1839.16	1878.23
Temp. [°C]	25.7	25.6	25.6	25.6	25.7	25.6	25.8	25.8	25.8	25.8	25.9	25.8	25.8	25.9	25.9	26	26	26.1	26.1	26.1	26.1	26.2	26.3	26.3	26.3	26.3	26.3	26.2	26.2	26.2	26.3	26.3	26.5	26.3	26.4	26.3	26.3	26.4	26.3	26.3	26.3	26.3	26.3	26.4	26.4	26.5	26.5	26.4	26.5
Mean	8459.25	8641.75	8896.75	9230.75	9597.5	9950	10293.2	10703.8	11085	11431.5	11818.5	12193	12587.8	12958.5	13326.2	13717	14026.8	14395	14722.8	15018	15283	15562	15862.2	16078.2	16371	16620.8	16849.8	17129	17380.8	17584	17791.5	18004.2	18221	18462.5	18653.5	18907	19075.5	19252	19420	19564.8	19778.8	19947.2	20100.8	20223.2	20361.2	20481.8	20634.8	20821.2	20949
StDev	494.379	466.119	539.654	549.279	593.777	596.679	604.905	640.026	675.805	633.227	630.688	645.912	624.668	629.108	612.281	649.421	592.448	615.991	647.687	689.073	734.754	778.377	827.6	844.816	901.174	892.117	927.172	919.124	964.292	954.304	918.646	980.703	979.506	1011.73	1041.42	990.726	1026.93	1038.41	1013.12	1033.6	1023.98	1088.12	1071.86	1068.6	1053.17	1069.4	1044.66	1097.87	1102.6
1;1	8707	8609	8897	9226	9555	9913	10214	10643	11053	11422	11772	12053	12516	12838	13172	13518	13905	14301	14590	14853	15157	15444	15753	16016	16287	16531	16661	17106	17244	17562	17710	18007	18164	18461	18579	18782	19026	19227	19437	19482	19724	19902	20066	20171	20321	20418	20745	20772	20783
1;2	8991	9268	9577	9895	10358	10701	11061	11531	11935	12209	12621	13063	13428	13837	14182	14633	14860	15232	15617	15960	16283	16607	16948	17167	17533	17762	18032	18257	18615	18737	18963	19195	19469	19724	19957	20166	20357	20500	20641	20825	20999	21218	21395	21470	21602	21716	21823	22106	22258
2;1	7863	8142	8257	8550	8907	9241	9585	9969	10281	10658	11079	11505	11917	12341	12728	13104	13458	13747	14067	14307	14513	14723	14934	15104	15333	15583	15782	16006	16264	16401	16718	16793	17074	17247	17409	17748	17843	17959	18160	18299	18498	18565	18772	18866	19031	19116	19276	19429	19586
2;2	8276	8548	8856	9252	9570	9945	10313	10672	11071	11437	11802	12151	12490	12818	13223	13613	13884	14300	14617	14952	15179	15474	15814	16026	16331	16607	16924	17147	17400	17636	17775	18022	18177	18418	18669	18932	19076	19322	19442	19653	19894	20104	20170	20386	20491	20677	20695	20978	21169
Time:				12:33 PM
System				CBUMAINZ-HP
User				CBUMainz-HP\User
Plate				[GRE96fb_chimney] - Greiner 96 Flat Black Cat. No.: 655079/655086/655077/655076
Lid lifter				No lid
Humidity Cassette				No humidity cassette
Smooth mode				Not selected
List of actions in this measurement script:
Plate
	Shaking
	Kinetic
		Fluorescence Top Reading				Actin
Name				GRE96fb_chimney
Plate layout
Plate area				A1-B2;C1-H1
Start Time				2020-12-11 10:54:37
Shaking (Orbital) Duration [s]				5
Shaking (Orbital) Position				Current
Shaking (Orbital) Amplitude [mm]				1
Shaking (Orbital) Frequency [rpm]				510
End Time				2020-12-11 10:54:42
Mode	Kinetic
Kinetic cycles				240
Interval time [hhmmss]				00:00:30
Mode	Fluorescence Top Reading
Name	Actin
Excitation				Filter
Excitation wavelength [nm]				360
Excitation bandwidth [nm]				35
Emission				Filter
Emission wavelength [nm]				415
Emission bandwidth [nm]				20
Gain Manual				50
Mirror				Automatic (50% Mirror)
Number of flashes				30
Integration time [µs]				40
Lag time [µs]				0
Settle time [ms]				0
Z-Position [μm]				17500
Z-Position mode				Manual
Multiple Reads per Well (Circle (filled))				2 x 2
Multiple Reads per Well (Border) [μm]				500
Part of Plate				A1-B2;C1-H1
Start Time				2020-12-11 10:54:47
Actin
1;1	1;2
2;1	2;2
Cycles / Well
	1	2	3	4	5	6	7	8	9	10	11	12	13	14	15	16	17	18	19	20	21	22	23	24	25	26	27	28	29	30	31	32	33	34	35	36	37	38	39	40	41	42	43	44	45	46	47	48	49
Time [s]	0	30.012	60.024	90.036	120.05	150.086	180.098	210.111	240.123	270.136	300.143	330.154	360.183	390.197	420.21	450.224	480.236	510.249	540.263	570.309	600.325	630.338	660.35	690.368	720.382	750.395	780.409	810.422	840.433	870.446	900.459	930.471	960.482	990.495	1020.51	1050.52	1080.54	1110.55	1140.56	1170.58	1200.59	1230.6	1260.62	1290.67	1320.68	1350.7	1380.71	1410.74	1440.75
Temp. [°C]	26.6	26.7	26.7	26.7	26.6	26.5	26.4	26.4	26.6	26.4	26.4	26.6	26.4	26.4	26.5	26.6	26.5	26.5	26.6	26.5	26.5	26.6	26.5	26.4	26.5	26.5	26.5	26.4	26.6	26.5	26.5	26.6	26.6	26.6	26.5	26.5	26.5	26.5	26.5	26.5	26.6	26.8	26.7	26.6	26.7	26.7	26.7	26.6	26.7
Mean	559.75	569.25	549.5	547.5	540.25	534.5	536.75	535.5	534	533.75	529	528.75	528.75	527.75	526.25	527.75	524.25	525.25	524	522.75	523.5	520.75	520.25	516.75	516.25	515.75	516.5	516.25	512.75	515.25	514	512.75	513	510.75	513.75	513.5	513.5	516	512.5	512.5	513.75	513.25	512.25	511.75	512	512	511.75	513.25	512.75
StDev	113.67	154.995	110.434	97.7019	79.6926	71.9004	75.2169	73.1688	72.1434	70.637	71.054	72.1035	70.3817	70.0779	69.8636	67.9871	71.2618	71.5839	68.7556	71.037	71.4073	68.1536	70.358	67.0591	68.5584	68.0361	67.5993	68.5584	68.9511	69.3656	71.6705	67.1832	65.4115	62.4733	64.6961	65.8964	63.6998	64.7611	62.5486	60.025	61.6299	61.9375	59.7962	60.8516	62.3912	62.0699	62.436	66.2539	65.8553
1;1	473	472	476	474	476	476	478	475	474	472	472	471	469	470	470	477	469	467	469	467	466	468	468	468	467	470	469	467	464	467	466	465	466	465	466	465	464	465	464	466	466	465	466	464	464	467	467	465	464
1;2	523	542	542	539	535	530	529	537	528	528	522	518	523	516	517	515	511	512	510	510	511	508	507	508	506	505	506	506	507	506	505	505	504	504	503	505	503	505	504	506	505	504	503	502	505	504	505	506	505
2;1	516	467	472	489	496	495	495	492	497	501	491	493	494	496	491	492	489	493	493	488	490	487	483	477	476	473	476	476	468	472	467	471	474	473	478	475	481	484	479	479	481	481	481	481	477	475	473	473	474
2;2	727	796	708	688	654	637	645	638	637	634	631	633	629	629	627	627	628	629	624	626	627	620	623	614	616	615	615	616	612	616	618	610	608	601	608	609	606	610	603	599	603	603	599	600	602	602	602	609	608
Cycles / Well
	1	2	3	4	5	6	7	8	9	10	11	12	13	14	15	16	17	18	19	20	21	22	23	24	25	26	27	28	29	30	31	32	33	34	35	36	37	38	39	40	41	42	43	44	45	46	47	48	49
Time [s]	0	30.012	60.024	90.036	120.05	150.086	180.098	210.111	240.123	270.136	300.143	330.154	360.183	390.197	420.21	450.224	480.236	510.249	540.263	570.309	600.325	630.338	660.35	690.368	720.382	750.395	780.409	810.422	840.433	870.446	900.459	930.471	960.482	990.495	1020.51	1050.52	1080.54	1110.55	1140.56	1170.58	1200.59	1230.6	1260.62	1290.67	1320.68	1350.7	1380.71	1410.74	1440.75
Temp. [°C]	26.5	26.6	26.7	26.7	26.6	26.5	26.4	26.5	26.6	26.4	26.4	26.6	26.4	26.4	26.5	26.6	26.5	26.6	26.6	26.5	26.5	26.5	26.5	26.5	26.5	26.5	26.5	26.5	26.6	26.5	26.5	26.7	26.6	26.6	26.5	26.5	26.5	26.5	26.5	26.6	26.7	26.7	26.7	26.6	26.7	26.7	26.7	26.6	26.7
Mean	3980	3777	3900.5	4064.75	4278.25	4503	4750	5005.25	5265.25	5548.75	5829	6103.25	6395.75	6691.75	6987.25	7291	7559.5	7863.75	8157.75	8424.5	8743	9009	9283.75	9541.5	9835	10045	10317.8	10567.8	10768	11031.8	11255.5	11492.2	11713	11903.8	12106.5	12288.2	12484	12704	12922.5	13115.2	13284.2	13382.2	13572.5	13719.8	13873.2	14046.2	14204.2	14377.2	14524
StDev	686.147	162.419	107.028	113.244	115.808	130.466	128.01	138.305	145.397	153.42	152.217	176.96	175.929	177.344	180.959	198.237	196.898	213.361	208.082	233.039	242.237	233.415	237.722	281.075	283.428	273.81	309.636	322.445	301.712	313.961	317.369	348.943	325.015	334.205	362.725	388.374	375.258	368.989	339.675	390.916	373.691	372.051	360.909	384.222	419.857	392.667	439.331	414.204	458.995
1;1	3600	3666	3822	3973	4173	4373	4616	4867	5119	5385	5657	5909	6200	6482	6788	7064	7338	7628	7935	8164	8470	8737	9029	9236	9525	9738	9983	10206	10414	10669	10897	11093	11319	11502	11725	11847	12090	12301	12544	12697	12877	12981	13202	13306	13395	13641	13732	13962	14037
1;2	5007	3994	4001	4172	4358	4591	4834	5095	5365	5633	5918	6177	6462	6756	7052	7355	7608	7879	8229	8449	8796	9051	9327	9560	9872	10080	10332	10559	10781	11068	11252	11508	11705	11873	12036	12279	12440	12656	12913	13052	13230	13314	13519	13646	13816	13926	14143	14282	14446
2;1	3612	3640	3795	3961	4185	4411	4668	4909	5164	5459	5751	6016	6316	6631	6904	7216	7488	7806	8055	8360	8660	8949	9189	9459	9741	9966	10229	10516	10727	10961	11204	11427	11713	11921	12066	12234	12412	12663	12864	13070	13247	13353	13501	13692	13864	14039	14147	14314	14468
2;2	3701	3808	3984	4153	4397	4637	4882	5150	5413	5718	5990	6311	6605	6898	7205	7529	7804	8142	8412	8725	9046	9299	9590	9911	10202	10396	10727	10990	11150	11429	11669	11941	12115	12319	12599	12793	12994	13196	13369	13642	13783	13881	14068	14235	14418	14579	14795	14951	15145
Cycles / Well
	1	2	3	4	5	6	7	8	9	10	11	12	13	14	15	16	17	18	19	20	21	22	23	24	25	26	27	28	29	30	31	32	33	34	35	36	37	38	39	40	41	42	43	44	45	46	47	48	49
Time [s]	0	30.012	60.024	90.036	120.05	150.086	180.098	210.111	240.123	270.136	300.143	330.154	360.183	390.197	420.21	450.224	480.236	510.249	540.263	570.309	600.325	630.338	660.35	690.368	720.382	750.395	780.409	810.422	840.433	870.446	900.459	930.471	960.482	990.495	1020.51	1050.52	1080.54	1110.55	1140.56	1170.58	1200.59	1230.6	1260.62	1290.67	1320.68	1350.7	1380.71	1410.74	1440.75
Temp. [°C]	26.6	26.7	26.7	26.6	26.5	26.5	26.4	26.5	26.5	26.4	26.5	26.6	26.4	26.5	26.5	26.6	26.5	26.5	26.6	26.5	26.5	26.5	26.5	26.5	26.5	26.5	26.5	26.5	26.6	26.5	26.5	26.7	26.7	26.5	26.5	26.6	26.5	26.5	26.6	26.6	26.7	26.8	26.8	26.6	26.7	26.7	26.7	26.6	26.7
Mean	3624	3732.5	3894.75	4081.75	4280.25	4513.25	4745.5	5000	5242	5506.75	5776.5	6048	6341.75	6628.25	6889.25	7182	7473.25	7774	8060.75	8335	8595.5	8903.75	9163.5	9427.75	9713.75	9941.75	10185.2	10467.8	10705.8	10934	11133	11371.8	11624.2	11806.5	12012.5	12202	12395.8	12597.2	12811	12980.8	13186	13366.2	13516	13713.2	13907.8	14058.8	14234	14448.8	14565.5
StDev	185.467	206.447	199.03	226.506	227.318	236.991	257.227	250.381	275.024	302.67	307.356	319.665	333.098	346.13	350.465	367.675	378.702	381.889	411.904	419.104	426.241	420.724	477.912	473.964	453.11	491.094	514.987	480.197	491.828	532.958	517.259	537.861	567.486	565.772	537.395	542.715	591.491	562.204	573.879	604.616	584.61	639.788	655.933	626.302	616.142	649.004	677.807	670.448	651.038
1;1	3407	3493	3660	3807	4007	4228	4437	4690	4907	5138	5411	5655	5945	6205	6465	6729	7015	7302	7564	7823	8074	8392	8602	8861	9179	9364	9558	9897	10131	10309	10512	10712	10939	11159	11367	11581	11698	11929	12128	12249	12454	12558	12706	12947	13132	13247	13392	13618	13741
1;2	3689	3778	3924	4118	4318	4562	4781	5060	5305	5575	5841	6123	6409	6733	6973	7258	7557	7844	8120	8395	8676	8997	9251	9514	9754	10009	10314	10555	10762	11006	11225	11491	11720	11832	12077	12253	12447	12652	12859	13072	13322	13493	13619	13827	14064	14208	14324	14594	14678
2;1	3558	3672	3853	4045	4238	4463	4702	4956	5186	5446	5703	5988	6265	6544	6811	7122	7393	7721	7994	8279	8525	8819	9047	9329	9640	9840	10073	10362	10606	10821	11031	11273	11523	11701	11931	12079	12300	12510	12730	12884	13101	13303	13437	13613	13817	13964	14175	14343	14518
2;2	3842	3987	4142	4357	4558	4800	5062	5294	5570	5868	6151	6426	6748	7031	7308	7619	7928	8229	8565	8843	9107	9407	9754	10007	10282	10554	10796	11057	11324	11600	11764	12011	12315	12534	12675	12895	13138	13298	13527	13718	13867	14111	14302	14466	14618	14816	15045	15240	15325
Cycles / Well
	1	2	3	4	5	6	7	8	9	10	11	12	13	14	15	16	17	18	19	20	21	22	23	24	25	26	27	28	29	30	31	32	33	34	35	36	37	38	39	40	41	42	43	44	45	46	47	48	49
Time [s]	0	30.012	60.024	90.036	120.05	150.086	180.098	210.111	240.123	270.136	300.143	330.154	360.183	390.197	420.21	450.224	480.236	510.249	540.263	570.309	600.325	630.338	660.35	690.368	720.382	750.395	780.409	810.422	840.433	870.446	900.459	930.471	960.482	990.495	1020.51	1050.52	1080.54	1110.55	1140.56	1170.58	1200.59	1230.6	1260.62	1290.67	1320.68	1350.7	1380.71	1410.74	1440.75
Temp. [°C]	26.6	26.7	26.6	26.6	26.5	26.4	26.4	26.5	26.5	26.4	26.5	26.5	26.5	26.5	26.5	26.6	26.5	26.5	26.6	26.5	26.5	26.5	26.5	26.6	26.6	26.6	26.4	26.5	26.5	26.5	26.5	26.7	26.7	26.5	26.5	26.6	26.5	26.5	26.6	26.6	26.7	26.8	26.7	26.6	26.7	26.7	26.7	26.6	26.7
Mean	3676	3794.75	3968.25	4164.75	4355.75	4574.5	4798	5021	5226	5473.5	5703	5926.5	6149.75	6378	6638.5	6863.25	7087.25	7338.25	7574.75	7810.75	8051.75	8283.75	8517.75	8753.75	8994.75	9236.5	9460.25	9694	9923.5	10133	10348.2	10561.2	10773.8	10989.5	11209.5	11381.8	11584.2	11805.5	12001	12161.8	12337.8	12529.2	12689.8	12892.5	13096.8	13242.8	13459.2	13617.5	13821.8
StDev	207.954	203.018	215.56	222.164	224.55	238.652	257.132	255.334	248.23	285.912	294.551	287.943	311.418	322.2	330.142	329.595	329.621	337.865	351.201	386.523	369.605	402.278	394.129	420.923	424.681	449.442	475.534	457.258	506.978	506.94	506.125	512.562	502.843	532.122	531.647	567.562	585.62	542.602	603.818	564.36	579.022	589.986	582.839	595.251	614.29	628.05	635.103	679.808	648.584
1;1	3520	3625	3791	3990	4182	4380	4584	4824	5047	5251	5451	5691	5900	6121	6388	6619	6857	7085	7324	7502	7785	7981	8210	8404	8672	8902	9122	9363	9582	9744	9969	10190	10434	10594	10868	10954	11137	11429	11578	11678	11832	12041	12186	12443	12625	12747	12930	13111	13317
1;2	3871	3974	4170	4371	4562	4783	5030	5241	5448	5720	5967	6189	6409	6668	6955	7166	7388	7641	7894	8147	8389	8672	8891	9158	9380	9671	9911	10144	10374	10616	10820	11029	11246	11511	11696	11897	12112	12289	12470	12703	12903	13070	13197	13401	13701	13803	14057	14264	14431
2;1	3474	3613	3773	3956	4142	4356	4567	4777	4978	5202	5445	5664	5861	6078	6321	6540	6752	7009	7222	7451	7683	7895	8146	8377	8585	8799	8983	9242	9397	9649	9856	10051	10254	10472	10645	10831	11021	11251	11389	11671	11845	11997	12184	12315	12513	12653	12891	12955	13208
2;2	3839	3967	4139	4342	4537	4779	5011	5242	5431	5721	5949	6162	6429	6645	6890	7128	7352	7618	7859	8143	8350	8587	8824	9076	9342	9574	9825	10027	10341	10523	10748	10975	11161	11381	11629	11845	12067	12253	12567	12595	12771	13009	13192	13411	13548	13768	13959	14140	14331
Cycles / Well
	1	2	3	4	5	6	7	8	9	10	11	12	13	14	15	16	17	18	19	20	21	22	23	24	25	26	27	28	29	30	31	32	33	34	35	36	37	38	39	40	41	42	43	44	45	46	47	48	49
Time [s]	0	30.012	60.024	90.036	120.05	150.086	180.098	210.111	240.123	270.136	300.143	330.154	360.183	390.197	420.21	450.224	480.236	510.249	540.263	570.309	600.325	630.338	660.35	690.368	720.382	750.395	780.409	810.422	840.433	870.446	900.459	930.471	960.482	990.495	1020.51	1050.52	1080.54	1110.55	1140.56	1170.58	1200.59	1230.6	1260.62	1290.67	1320.68	1350.7	1380.71	1410.74	1440.75
Temp. [°C]	26.6	26.7	26.6	26.6	26.5	26.4	26.4	26.5	26.5	26.4	26.5	26.5	26.5	26.5	26.6	26.6	26.6	26.5	26.6	26.5	26.6	26.5	26.5	26.6	26.5	26.6	26.5	26.5	26.5	26.5	26.6	26.7	26.7	26.5	26.5	26.6	26.5	26.5	26.6	26.6	26.7	26.8	26.7	26.6	26.7	26.7	26.7	26.6	26.7
Mean	3662.75	3778.75	3962.5	4142.25	4334.75	4554.75	4765.75	4983.25	5186.5	5417	5658.25	5874.25	6091.5	6308	6547.25	6774.25	6995	7234.75	7472.75	7726.5	7957	8207	8431	8672.25	8897	9125	9361.5	9566.25	9821	10023.8	10259	10478.2	10669.8	10903.2	11097.8	11347	11536.5	11744.2	11944	12082.5	12293.8	12532.2	12696.5	12906.8	13054.5	13272	13502	13633.2	13909.2
StDev	183.663	190.523	196.24	201.992	216.98	218.698	237.098	218.886	228.685	246.597	252.703	243.891	260.344	264.183	274.726	261.643	243.221	251.206	256.813	223.238	264.284	273.574	275.519	293.153	318.752	301.268	318.97	336.108	343.714	362.084	342.262	391.646	382.686	382.13	402.232	429.912	416.482	426.598	416.693	412.964	419.483	429.412	471.846	435.762	436.411	476.37	455.014	470.129	394.566
1;1	3509	3623	3803	3993	4171	4389	4595	4814	5013	5210	5470	5692	5894	6108	6361	6610	6811	7053	7286	7533	7775	8025	8220	8488	8675	8913	9191	9343	9618	9815	10062	10228	10391	10641	10846	11083	11211	11475	11703	11755	11994	12243	12360	12618	12734	12946	13213	13306	13516
1;2	3849	3970	4161	4351	4567	4776	5007	5203	5421	5651	5918	6120	6354	6556	6832	7049	7238	7486	7728	7970	8228	8485	8710	8966	9213	9437	9672	9930	10173	10377	10605	10883	11053	11302	11520	11818	11964	12194	12365	12537	12741	13002	13155	13356	13510	13791	13972	14139	14314
2;1	3501	3607	3785	3947	4130	4346	4532	4777	4969	5198	5415	5639	5843	6053	6268	6499	6762	6987	7220	7541	7690	7925	8170	8361	8575	8825	9000	9225	9448	9624	9883	10068	10294	10518	10674	10896	11149	11297	11487	11711	11883	12101	12225	12458	12632	12797	13024	13167	13631
2;2	3792	3915	4101	4278	4471	4708	4929	5139	5343	5609	5830	6046	6275	6515	6728	6939	7169	7413	7657	7862	8135	8393	8624	8874	9125	9325	9583	9767	10045	10279	10486	10734	10941	11152	11351	11591	11822	12011	12221	12327	12557	12783	13046	13195	13342	13554	13799	13921	14176
Cycles / Well
	1	2	3	4	5	6	7	8	9	10	11	12	13	14	15	16	17	18	19	20	21	22	23	24	25	26	27	28	29	30	31	32	33	34	35	36	37	38	39	40	41	42	43	44	45	46	47	48	49
Time [s]	0	30.012	60.024	90.036	120.05	150.086	180.098	210.111	240.123	270.136	300.143	330.154	360.183	390.197	420.21	450.224	480.236	510.249	540.263	570.309	600.325	630.338	660.35	690.368	720.382	750.395	780.409	810.422	840.433	870.446	900.459	930.471	960.482	990.495	1020.51	1050.52	1080.54	1110.55	1140.56	1170.58	1200.59	1230.6	1260.62	1290.67	1320.68	1350.7	1380.71	1410.74	1440.75
Temp. [°C]	26.7	26.7	26.6	26.6	26.5	26.4	26.4	26.4	26.5	26.4	26.5	26.5	26.5	26.5	26.6	26.6	26.6	26.5	26.6	26.5	26.6	26.5	26.5	26.6	26.5	26.6	26.5	26.5	26.5	26.5	26.6	26.7	26.7	26.5	26.5	26.6	26.5	26.5	26.6	26.6	26.7	26.8	26.7	26.7	26.7	26.7	26.7	26.6	26.7
Mean	3713.25	3815.25	3976	4167.25	4355.75	4569	4795.75	5040	5301.5	5548	5807.25	6061.5	6329.5	6606.5	6898.25	7151.5	7433	7689.25	7979.5	8261.5	8520	8744.5	9051.25	9280.75	9514	9789	10039.5	10276.5	10496.8	10710.8	10945.5	11136.8	11342.8	11533	11774.2	11966	12110.8	12293.2	12470	12666.5	12825.2	13008.2	13117.2	13331	13455.8	13624	13746.8	13919.8	14075.2
StDev	170.363	190.89	187.689	207.22	193.923	210.151	216.314	225.69	224.841	244.042	260.048	256.569	274.656	292.923	288.272	316.896	306.492	339.953	320.762	336.492	337.849	360.243	382.435	408.053	445.708	398.568	479.267	410.615	463.524	476.065	468.758	455.217	503.409	490.836	509.962	499.39	551.378	540.151	544.159	544.514	537.56	522.208	527.654	582.952	614.028	563.992	644.139	584.348	681.796
1;1	3556	3653	3807	4005	4197	4387	4613	4828	5101	5339	5571	5840	6106	6350	6649	6871	7186	7413	7718	7958	8240	8455	8696	8949	9147	9453	9632	9937	10105	10342	10584	10765	10982	11165	11351	11612	11737	11866	12061	12266	12406	12585	12689	12893	13048	13233	13235	13465	13619
1;2	3902	4041	4202	4425	4592	4826	5057	5310	5571	5832	6112	6372	6662	6960	7269	7524	7812	8097	8375	8678	8939	9189	9523	9774	10055	10262	10598	10762	11057	11281	11504	11666	11954	12109	12393	12584	12739	12937	13085	13288	13451	13642	13726	14081	14161	14287	14461	14664	14851
2;1	3583	3661	3837	3994	4197	4408	4623	4882	5132	5350	5612	5862	6102	6382	6692	6906	7182	7405	7719	8021	8252	8448	8789	8942	9150	9465	9648	9935	10127	10295	10533	10749	10882	11087	11361	11513	11568	11828	11966	12157	12349	12575	12663	12846	12847	13085	13170	13442	13399
2;2	3812	3906	4058	4245	4437	4655	4890	5140	5402	5671	5934	6172	6448	6734	6983	7305	7552	7842	8106	8389	8649	8886	9197	9458	9704	9976	10280	10472	10698	10925	11161	11367	11553	11771	11992	12155	12399	12542	12768	12955	13095	13231	13391	13504	13767	13891	14121	14108	14432
Cycles / Well
	1	2	3	4	5	6	7	8	9	10	11	12	13	14	15	16	17	18	19	20	21	22	23	24	25	26	27	28	29	30	31	32	33	34	35	36	37	38	39	40	41	42	43	44	45	46	47	48	49
Time [s]	0	30.012	60.024	90.036	120.05	150.086	180.098	210.111	240.123	270.136	300.143	330.154	360.183	390.197	420.21	450.224	480.236	510.249	540.263	570.309	600.325	630.338	660.35	690.368	720.382	750.395	780.409	810.422	840.433	870.446	900.459	930.471	960.482	990.495	1020.51	1050.52	1080.54	1110.55	1140.56	1170.58	1200.59	1230.6	1260.62	1290.67	1320.68	1350.7	1380.71	1410.74	1440.75
Temp. [°C]	26.7	26.7	26.6	26.6	26.6	26.4	26.5	26.5	26.4	26.4	26.6	26.4	26.4	26.5	26.6	26.6	26.6	26.5	26.5	26.5	26.6	26.5	26.4	26.6	26.5	26.5	26.4	26.5	26.5	26.5	26.6	26.7	26.7	26.5	26.5	26.6	26.5	26.5	26.6	26.6	26.8	26.7	26.7	26.6	26.7	26.8	26.6	26.6	26.7
Mean	3616.25	3760.75	3957.75	4184.75	4426	4672.5	4962.75	5243.75	5541	5839	6132.25	6446	6768.75	7091.5	7393.5	7701.25	8020	8340	8680	8984.75	9268.5	9585	9897.25	10160	10475	10753.5	11036.8	11296.8	11519	11808.2	12055.5	12255	12514.2	12721	12951.5	13164.5	13382.5	13569.2	13782.2	13900.5	14062.8	14250.8	14467	14649	14826.5	14995.2	15182.5	15323.5	15447
StDev	102.295	113.562	97.9605	115.595	124.435	116.093	117.247	145.264	124.062	139.363	153.487	151.012	156.751	164.784	166.59	163.689	149.314	184.23	174.501	180.622	182.272	198.553	177.092	210.233	218.615	186.738	221.233	227.774	223.836	207.246	209.032	186.785	217.472	298.437	223.681	261.644	256.89	214.486	219.543	255.74	290.399	268.3	261.41	306.315	298.687	237.581	305.494	288.83	278.291
1;1	3621	3756	3958	4164	4405	4644	4946	5211	5519	5809	6099	6413	6719	7054	7352	7643	7965	8274	8620	8921	9200	9526	9875	10062	10439	10704	11047	11285	11444	11779	12053	12224	12513	12712	12965	13139	13304	13543	13741	13909	14156	14322	14517	14684	14912	15050	15207	15345	15469
1;2	3744	3913	4087	4346	4595	4827	5125	5446	5705	6037	6351	6657	6993	7311	7627	7940	8239	8613	8934	9248	9539	9877	10148	10470	10792	11026	11341	11614	11852	12102	12341	12525	12822	13142	13263	13542	13760	13880	14104	14248	14424	14595	14816	15063	15212	15309	15605	15724	15826
2;1	3494	3639	3850	4071	4295	4547	4845	5100	5404	5710	5992	6298	6628	6913	7232	7568	7903	8209	8536	8837	9141	9434	9735	10007	10302	10603	10831	11080	11374	11618	11845	12102	12351	12465	12783	12977	13185	13415	13638	13645	13763	13988	14244	14361	14571	14812	14937	15099	15184
2;2	3606	3735	3936	4158	4409	4672	4935	5218	5536	5800	6087	6416	6735	7088	7363	7654	7973	8264	8630	8933	9194	9503	9831	10101	10367	10681	10928	11208	11406	11734	11983	12169	12371	12565	12795	13000	13281	13439	13646	13800	13908	14098	14291	14488	14611	14810	14981	15126	15309
Cycles / Well
	1	2	3	4	5	6	7	8	9	10	11	12	13	14	15	16	17	18	19	20	21	22	23	24	25	26	27	28	29	30	31	32	33	34	35	36	37	38	39	40	41	42	43	44	45	46	47	48	49
Time [s]	0	30.044	60.057	90.071	120.081	150.094	180.107	210.118	240.128	270.138	300.164	330.181	360.193	390.202	420.215	450.226	480.252	510.264	540.279	570.291	600.304	630.331	660.358	690.368	720.381	750.39	780.403	810.412	840.425	870.436	900.449	930.462	960.479	990.488	1020.5	1050.51	1080.52	1110.54	1140.55	1170.56	1200.57	1230.58	1260.62	1290.63	1320.64	1350.66	1380.67	1410.68	1440.69
Temp. [°C]	27.3	27.1	27.1	27	27.1	27	27	27	27	27	27	27.1	27	27	27.1	27	26.9	27	26.9	26.9	26.9	27.1	27	27	27.1	26.9	27	26.9	27.1	27.2	27	26.9	26.9	27	27	26.9	26.9	27	26.9	27	27	27	27	27	27	27	26.9	26.9	26.9
Mean	3704.25	3803	3952.25	4133.5	4328	4523	4736.5	4966.5	5187	5448.5	5686.25	5942.5	6193.25	6458	6738.25	7011.25	7289.25	7586.5	7863.5	8166	8443.75	8732	9036.75	9307.5	9610	9907	10213	10465.8	10691.2	10998.8	11261.2	11518.2	11780.5	12024	12276	12516	12735.8	12981.8	13199.2	13442.8	13643.8	13870.8	14093.2	14344	14531	14694.5	14866.2	15087	15301.2
StDev	193.97	185.858	192.614	199.894	217.752	225.31	213.755	224.048	240.154	245.768	237.243	268.875	264.481	274.948	301.072	292.346	307.674	326.914	332.355	337.695	342.833	351.383	386.162	395.719	395.913	412.844	460.987	459.28	475.784	501.731	483.954	506.129	492.879	527.743	524.878	557.473	555.27	541.378	597.777	564.756	567.787	618.788	620.569	645.642	640.382	618.758	642.426	647.081	704.623
1;1	3574	3675	3822	4013	4190	4383	4584	4826	5036	5289	5544	5775	6057	6290	6553	6858	7103	7377	7658	7996	8245	8596	8832	9128	9404	9703	9966	10201	10454	10721	11012	11295	11549	11789	12093	12226	12506	12684	12905	13201	13404	13569	13792	14034	14278	14404	14539	14823	15016
1;2	3900	3997	4146	4324	4548	4760	4951	5203	5441	5698	5940	6199	6432	6724	7072	7312	7618	7917	8196	8509	8807	9103	9442	9747	10004	10341	10679	10916	11189	11545	11789	12059	12307	12582	12834	13086	13293	13553	13870	14062	14215	14539	14782	15018	15245	15353	15549	15802	16112
2;1	3505	3616	3755	3916	4098	4285	4524	4731	4935	5192	5433	5654	5888	6161	6424	6681	6962	7243	7508	7779	8072	8309	8604	8853	9159	9435	9694	9959	10148	10450	10720	10926	11212	11406	11635	11884	12068	12383	12529	12783	12964	13166	13392	13599	13776	13980	14140	14326	14485
2;2	3838	3924	4086	4281	4476	4664	4887	5106	5336	5615	5828	6142	6396	6657	6904	7194	7474	7809	8092	8380	8651	8920	9269	9502	9873	10149	10513	10787	10974	11279	11524	11793	12054	12319	12542	12868	13076	13307	13493	13725	13992	14209	14407	14725	14825	15041	15237	15397	15592
Method name: Actin polymerization
Application: SparkControl				V3.1
Device: Spark				Serial number: 2007011179
Firmware:				LUM:V5.2.4|ABS:V4.3.2|ABS_MEX:V5.1.1|MTP:V14.2.11|FLUOR:V5.1.4|FLUOR_BOTTOM:V5.0.2|PODI:V1.11.2
Date:				2020-12-11
Time:				3:02 PM
System				CBUMAINZ-HP
User				CBUMainz-HP\User
Plate				[GRE96fb_chimney] - Greiner 96 Flat Black Cat. No.: 655079/655086/655077/655076
Lid lifter				No lid
Humidity Cassette				No humidity cassette
Smooth mode				Not selected
List of actions in this measurement script:
Plate
	Shaking
	Kinetic
		Fluorescence Top Reading				Actin
Name				GRE96fb_chimney
Plate layout
Plate area				A1-B2;C1-H1
Start Time				2020-12-11 13:02:13
Shaking (Orbital) Duration [s]				5
Shaking (Orbital) Position				Current
Shaking (Orbital) Amplitude [mm]				1
Shaking (Orbital) Frequency [rpm]				510
End Time				2020-12-11 13:02:18
Mode	Kinetic
Kinetic cycles				240
Interval time [hhmmss]				00:00:30
Mode	Fluorescence Top Reading
Name	Actin
Excitation				Filter
Excitation wavelength [nm]				360
Excitation bandwidth [nm]				35
Emission				Filter
Emission wavelength [nm]				415
Emission bandwidth [nm]				20
Gain Manual				50
Mirror				Automatic (50% Mirror)
Number of flashes				30
Integration time [µs]				40
Lag time [µs]				0
Settle time [ms]				0
Z-Position [μm]				17500
Z-Position mode				Manual
Multiple Reads per Well (Circle (filled))				2 x 2
Multiple Reads per Well (Border) [μm]				500
Part of Plate				A1-B2;C1-H1
Start Time				2020-12-11 13:02:23
Actin
1;1	1;2
2;1	2;2
Cycles / Well
A1	1	2	3	4	5	6	7	8	9	10	11	12	13	14	15	16	17	18	19	20	21	22	23	24	25	26	27	28	29	30	31	32	33	34	35	36	37	38	39	40	41	42	43	44	45	46	47	48	49
Time [s]	0	30.044	60.057	90.071	120.081	150.094	180.107	210.118	240.128	270.138	300.164	330.181	360.193	390.202	420.215	450.226	480.252	510.264	540.279	570.291	600.304	630.331	660.358	690.368	720.381	750.39	780.403	810.412	840.425	870.436	900.449	930.462	960.479	990.488	1020.5	1050.51	1080.52	1110.54	1140.55	1170.56	1200.57	1230.58	1260.62	1290.63	1320.64	1350.66	1380.67	1410.68	1440.69
Temp. [°C]	27.2	27.2	27.1	27	27	27	27	26.9	27	27	27	27.1	27.1	26.9	26.9	26.9	27	26.9	26.9	26.9	26.9	27	27	26.9	27	26.9	27	26.9	27	27.1	27.1	26.9	26.8	26.9	26.9	26.9	26.9	26.8	27	26.9	26.9	26.9	27	27	27	27	26.9	26.9	26.9
Mean	532.75	506.5	506.25	505.25	505.75	506.25	500	506	507.5	513.25	514.5	517.5	520.75	523.5	523.75	531.75	536.75	540.75	543.5	546.5	548.25	553	551.75	548.75	545.75	543.75	543	541.25	542	541.25	540.5	542.5	549.5	555	572	594.5	612.75	641.75	659.75	675	681.25	692.5	695.75	701.5	702.25	697.5	693.25	687.75	676
StDev	168.027	161.927	160.776	160.768	159.161	159.157	146.075	153.627	153.927	166.568	170.977	173.66	177.41	191.368	186.403	200.91	212.268	214.208	226.354	227.04	239.839	230.245	240.835	240.864	243.604	245.145	246.33	244.943	243.944	244.467	239.841	243.17	241.526	241.81	235.753	235.55	243.467	268.1	287.094	305.281	314.188	331.389	335.108	343.042	337.146	337.801	329.128	319.66	304.047
1;1	778	749	747	746	744	744	718	735	737	762	770	777	786	810	803	833	855	862	883	887	908	898	913	910	911	911	912	908	907	907	899	906	909	913	910	903	901	910	902	897	898	885	888	902	905	891	898	901	898
1;2	416	416	414	412	412	408	409	409	409	410	410	413	415	413	419	426	423	438	432	439	429	453	432	423	414	404	402	399	396	395	393	394	395	393	393	395	393	393	393	394	394	396	394	394	399	394	395	396	396
2;1	432	423	437	433	435	443	445	451	450	448	446	450	450	442	442	439	439	435	433	430	430	430	430	430	428	432	428	424	431	427	431	428	426	427	430	427	430	430	430	431	430	429	432	429	434	431	432	433	433
2;2	505	438	427	430	432	430	428	429	434	433	432	430	432	429	431	429	430	428	426	430	426	431	432	432	430	428	430	434	434	436	439	442	468	487	555	653	727	834	914	978	1003	1060	1069	1081	1071	1074	1048	1021	977
C1	1	2	3	4	5	6	7	8	9	10	11	12	13	14	15	16	17	18	19	20	21	22	23	24	25	26	27	28	29	30	31	32	33	34	35	36	37	38	39	40	41	42	43	44	45	46	47	48	49
Time [s]	0	30.044	60.057	90.071	120.081	150.094	180.107	210.118	240.128	270.138	300.164	330.181	360.193	390.202	420.215	450.226	480.252	510.264	540.279	570.291	600.304	630.331	660.358	690.368	720.381	750.39	780.403	810.412	840.425	870.436	900.449	930.462	960.479	990.488	1020.5	1050.51	1080.52	1110.54	1140.55	1170.56	1200.57	1230.58	1260.62	1290.63	1320.64	1350.66	1380.67	1410.68	1440.69
Temp. [°C]	27.2	27.1	27.2	27	27.1	27	27	27	27	27	27	27.1	27.1	27	27	27	26.9	27	26.9	26.9	26.9	27.1	27	27	27.1	26.9	27	26.9	27.1	27.2	27.1	26.9	26.9	27	27	26.9	26.9	27	26.9	27	26.9	27	27	27	27	27	27	26.9	26.9
Mean	4782.25	4269.5	4576	5026	4811.5	5333.5	5161.75	5538	5865.75	6008.75	6292	6800	6920.5	7483	8200.25	8025.25	8466	8871.25	8994	9460.25	9802.25	10167.8	10257.5	10678	10951.2	11237.2	11396.5	11679.2	11881.2	12294	12416	12833.8	13050.8	13213.8	13567	13649	14217.5	14088.8	14724.5	14657	14918.2	15424	15356	15532.2	15901.2	15726.2	15726.8	16192.2	16484.8
StDev	867.982	653.623	760.954	446.836	636.766	655.251	231.125	570.947	445.456	274.359	338.586	486.957	339	691.223	406.611	549.516	676.193	470.283	577.228	658.379	519.074	358.561	612.48	655.447	552.353	426.502	556.876	598.099	619.906	682.726	611.917	499.914	677.088	713.489	615.509	763.583	473.208	805.043	316.638	1144.51	1108.15	374.519	1319.14	1078.73	370.498	1196.75	903.162	1093.33	477.445
1;1	5598	3769	3909	5331	4287	4516	4901	5031	5319	5714	5890	6180	6541	6833	8586	7478	7765	8252	8401	8751	9067	10165	9599	9934	10144	10768	10742	11007	11158	11554	11708	12212	12150	12401	12810	12755	13669	13151	14394	13531	13711	15109	14154	14324	15560	14526	14718	14898	15967
1;2	3979	5228	4610	4883	5736	5187	5458	6347	5974	6353	6666	6910	7331	7601	7931	8760	8708	9046	9758	9759	10067	10651	11037	11110	11355	11752	12047	12316	12579	13116	13106	13391	13765	14002	14255	14457	14825	14867	15154	16152	15558	15940	17184	16162	16428	17313	16780	16951	17121
2;1	5465	3979	4154	5431	4554	5557	5100	5285	6392	5886	6161	7359	6779	7095	8508	7775	8097	9368	8751	9107	10246	9792	10001	10334	11251	11042	11200	11369	11627	11960	12155	12707	13009	12876	13392	13309	14180	13696	14642	14049	14292	15456	14698	14965	15827	15170	15305	15688	16470
2;2	4087	4102	5631	4459	4669	6074	5188	5489	5778	6082	6451	6751	7031	8403	7776	8088	9294	8819	9066	10224	9829	10063	10393	11334	11055	11387	11597	12025	12161	12546	12695	13025	13279	13576	13811	14075	14196	14641	14708	14896	16112	15191	15388	16678	15790	15896	16104	17232	16381
Cycles / Well
D1	1	2	3	4	5	6	7	8	9	10	11	12	13	14	15	16	17	18	19	20	21	22	23	24	25	26	27	28	29	30	31	32	33	34	35	36	37	38	39	40	41	42	43	44	45	46	47	48	49
Time [s]	0	30.044	60.057	90.071	120.081	150.094	180.107	210.118	240.128	270.138	300.164	330.181	360.193	390.202	420.215	450.226	480.252	510.264	540.279	570.291	600.304	630.331	660.358	690.368	720.381	750.39	780.403	810.412	840.425	870.436	900.449	930.462	960.479	990.488	1020.5	1050.51	1080.52	1110.54	1140.55	1170.56	1200.57	1230.58	1260.62	1290.63	1320.64	1350.66	1380.67	1410.68	1440.69
Temp. [°C]	27.3	27.1	27.1	27	27.1	27	27	27	27	27	27	27.1	27	27	27.1	27	26.9	27	26.9	26.9	26.9	27.1	27	27	27.1	26.9	27	26.9	27.1	27.2	27	26.9	26.9	27	27	26.9	26.9	27	26.9	27	27	27	27	27	27	27	26.9	26.9	26.9
Mean	3704.25	3803	3952.25	4133.5	4328	4523	4736.5	4966.5	5187	5448.5	5686.25	5942.5	6193.25	6458	6738.25	7011.25	7289.25	7586.5	7863.5	8166	8443.75	8732	9036.75	9307.5	9610	9907	10213	10465.8	10691.2	10998.8	11261.2	11518.2	11780.5	12024	12276	12516	12735.8	12981.8	13199.2	13442.8	13643.8	13870.8	14093.2	14344	14531	14694.5	14866.2	15087	15301.2
StDev	193.97	185.858	192.614	199.894	217.752	225.31	213.755	224.048	240.154	245.768	237.243	268.875	264.481	274.948	301.072	292.346	307.674	326.914	332.355	337.695	342.833	351.383	386.162	395.719	395.913	412.844	460.987	459.28	475.784	501.731	483.954	506.129	492.879	527.743	524.878	557.473	555.27	541.378	597.777	564.756	567.787	618.788	620.569	645.642	640.382	618.758	642.426	647.081	704.623
1;1	3574	3675	3822	4013	4190	4383	4584	4826	5036	5289	5544	5775	6057	6290	6553	6858	7103	7377	7658	7996	8245	8596	8832	9128	9404	9703	9966	10201	10454	10721	11012	11295	11549	11789	12093	12226	12506	12684	12905	13201	13404	13569	13792	14034	14278	14404	14539	14823	15016
1;2	3900	3997	4146	4324	4548	4760	4951	5203	5441	5698	5940	6199	6432	6724	7072	7312	7618	7917	8196	8509	8807	9103	9442	9747	10004	10341	10679	10916	11189	11545	11789	12059	12307	12582	12834	13086	13293	13553	13870	14062	14215	14539	14782	15018	15245	15353	15549	15802	16112
2;1	3505	3616	3755	3916	4098	4285	4524	4731	4935	5192	5433	5654	5888	6161	6424	6681	6962	7243	7508	7779	8072	8309	8604	8853	9159	9435	9694	9959	10148	10450	10720	10926	11212	11406	11635	11884	12068	12383	12529	12783	12964	13166	13392	13599	13776	13980	14140	14326	14485
2;2	3838	3924	4086	4281	4476	4664	4887	5106	5336	5615	5828	6142	6396	6657	6904	7194	7474	7809	8092	8380	8651	8920	9269	9502	9873	10149	10513	10787	10974	11279	11524	11793	12054	12319	12542	12868	13076	13307	13493	13725	13992	14209	14407	14725	14825	15041	15237	15397	15592
Cycles / Well
E1	1	2	3	4	5	6	7	8	9	10	11	12	13	14	15	16	17	18	19	20	21	22	23	24	25	26	27	28	29	30	31	32	33	34	35	36	37	38	39	40	41	42	43	44	45	46	47	48	49
Time [s]	0	30.044	60.057	90.071	120.081	150.094	180.107	210.118	240.128	270.138	300.164	330.181	360.193	390.202	420.215	450.226	480.252	510.264	540.279	570.291	600.304	630.331	660.358	690.368	720.381	750.39	780.403	810.412	840.425	870.436	900.449	930.462	960.479	990.488	1020.5	1050.51	1080.52	1110.54	1140.55	1170.56	1200.57	1230.58	1260.62	1290.63	1320.64	1350.66	1380.67	1410.68	1440.69
Temp. [°C]	27.3	27.1	27.1	27	27.1	27	27	27	27	27	27	27.1	27	27	27.1	27	26.9	27	26.9	26.9	26.9	27.1	27	27	27.1	26.9	27	27	27.1	27.1	27	26.9	26.9	27	27	26.9	26.9	27	26.9	27	27	27	27	27	27	27.1	26.9	26.9	26.9
Mean	3951.25	4089	4199	4379.75	4552.25	4745.5	4950	5189.25	5372.75	5593.5	5817.25	6047.25	6282.75	6536.5	6807.5	7063	7329.25	7585.25	7887.75	8162.25	8445	8736.25	8995.75	9295.25	9524	9820.25	10079.8	10353.2	10601.5	10906	11128.5	11407.2	11684	11919.8	12193	12434.2	12659.8	12926.5	13144.8	13357.2	13643	13850.5	14046.2	14269	14472.5	14698.2	14866	15078.8	15268
StDev	453.71	439.723	433.234	422.232	386.878	385.602	368.956	337.602	357.391	335.981	325.74	326.67	324.938	310.274	318.511	317.996	317.493	346.648	373.164	384.874	381.349	382.51	377.917	376.556	437.768	406.733	406.105	464.146	465.977	483.281	469.148	484.234	523.336	501.708	503.97	526.504	538.234	578.311	540.333	555.211	554.695	612.36	558.675	593.14	635.438	613.421	618.374	624.528	642.508
1;1	4569	4676	4780	4933	5054	5239	5409	5607	5779	5967	6156	6377	6584	6766	7044	7290	7539	7818	8165	8455	8704	8977	9217	9464	9679	9955	10156	10340	10569	10877	11081	11298	11524	11778	12071	12264	12543	12776	12968	13231	13514	13701	13889	14126	14268	14540	14728	14958	15122
1;2	3958	4065	4204	4402	4598	4789	5002	5263	5491	5711	5956	6215	6468	6774	7014	7298	7569	7856	8164	8428	8750	9045	9334	9665	9969	10239	10535	10902	11139	11482	11679	12006	12320	12533	12826	13069	13310	13618	13802	14054	14310	14599	14710	14986	15251	15425	15598	15861	16009
2;1	3496	3612	3742	3915	4128	4309	4515	4800	4928	5168	5391	5626	5848	6115	6354	6620	6881	7103	7375	7626	7921	8202	8483	8786	8930	9270	9549	9768	10007	10302	10539	10836	11073	11332	11609	11820	12012	12234	12519	12711	12976	13125	13379	13560	13739	13959	14113	14345	14475
2;2	3782	4003	4070	4269	4429	4645	4874	5087	5293	5528	5766	5971	6231	6491	6818	7044	7328	7564	7847	8140	8405	8721	8949	9266	9518	9817	10079	10403	10691	10963	11215	11489	11819	12036	12266	12584	12774	13078	13290	13433	13772	13977	14207	14404	14632	14869	15025	15151	15466
H1	1	2	3	4	5	6	7	8	9	10	11	12	13	14	15	16	17	18	19	20	21	22	23	24	25	26	27	28	29	30	31	32	33	34	35	36	37	38	39	40	41	42	43	44	45	46	47	48	49
Time [s]	0	30.044	60.057	90.071	120.081	150.094	180.107	210.118	240.128	270.138	300.164	330.181	360.193	390.202	420.215	450.226	480.252	510.264	540.279	570.291	600.304	630.331	660.358	690.368	720.381	750.39	780.403	810.412	840.425	870.436	900.449	930.462	960.479	990.488	1020.5	1050.51	1080.52	1110.54	1140.55	1170.56	1200.57	1230.58	1260.62	1290.63	1320.64	1350.66	1380.67	1410.68	1440.69
Temp. [°C]	27.3	27.1	27	27	27.1	27	27	27	27	27	27	27.1	27	26.9	27	27	26.9	27	26.9	26.9	26.9	27.1	27	27	27	27	27	27	27.1	27.1	27	26.9	26.9	27	27	27	26.9	27.1	26.9	27	27	27	27	27	27.1	27	27	26.9	26.9
Mean	3665.75	3768	3973	4213.5	4448.75	4701.75	4970.75	5262.75	5563.25	5899.5	6202.5	6543.25	6878.25	7220.75	7580	7928.75	8268	8620	8928.75	9278.25	9581.25	9909.25	10243.5	10541.2	10850.8	11143.5	11455.5	11734.5	11987.8	12258	12541.8	12797	13021	13353.5	13497.5	13697.8	13923.2	14157.2	14366.8	14564.5	14696.2	14945	15136.2	15280.5	15495	15631.2	15810.8	15973	16109
StDev	156.274	176.863	159.921	235.622	217.512	228.563	216.649	204.267	186.632	189.345	193.779	206.342	187.135	192.424	186.723	188.834	174.427	200.496	205.318	195.865	198.396	187.171	221.017	202.33	239.728	224.349	200.39	244.492	238.293	269.79	236.243	197.415	264.244	261.149	272.911	250.026	261.011	256.912	318.517	277.787	301.333	267.491	298.703	272.15	298.737	314.976	275.639	297.954	298.187
1;1	3622	3747	3890	4088	4348	4591	4846	5136	5433	5788	6076	6412	6751	7091	7453	7822	8175	8479	8816	9218	9476	9802	10085	10415	10738	11032	11353	11527	11814	12154	12424	12734	12874	13211	13350	13607	13831	14082	14200	14454	14527	14869	15025	15127	15338	15499	15726	15907	16000
1;2	3708	3844	4030	4215	4458	4707	5015	5342	5620	5996	6296	6671	6998	7380	7743	8107	8428	8805	9128	9466	9816	10134	10513	10783	11125	11401	11687	12034	12313	12620	12862	13067	13384	13576	13866	14061	14311	14513	14792	14963	15124	15336	15574	15666	15924	16093	16212	16384	16522
2;1	3853	3533	4168	4543	4747	5018	5256	5512	5802	6114	6428	6762	7075	7391	7737	8068	8400	8779	9073	9399	9664	9985	10334	10628	10959	11246	11546	11834	12019	12276	12564	12790	13041	13570	13531	13633	13806	14132	14414	14518	14684	14844	15045	15272	15464	15546	15722	15930	16095
2;2	3480	3948	3804	4008	4242	4491	4766	5061	5398	5700	6010	6328	6689	7021	7387	7718	8069	8417	8698	9030	9369	9716	10042	10339	10581	10895	11236	11543	11805	11982	12317	12597	12785	13057	13243	13490	13745	13902	14061	14323	14450	14731	14901	15057	15254	15387	15583	15671	15819
[truncated: 148 more columns]
