# Supplementary material for: ERK3/MAPK6 dictates CDC42/RAC1 activity and ARP2/3-dependent actin polymerization
Source: eLife journal article supplement (doi:10.7554/elife.85167), 2023-04-14
Supplement: fig5-figsupp1-data2 [file Figure 5-figure supplement 1C-source data.xlsx]

## Sheet: Sheet1
F/G Actin in vivo assay from 200107
Rep1
run 7/1/20
	F	G	F/G
shCo	9846326	19884196	0.495184
shERK3	4558305	21114681	0.215883
Rep2
Run 4/9/20
	F-Actin	G-Actin	F/G
shCo	11201125	6521803	1.71749
shERK3	1161627	16154794	0.071906
Rep3
run 14/10/20
	F-Actin	G-Actin	F/G
shCo	25666045	14753995	1.7396
shERK3	7797539	25747116	0.302851
