# Supplementary material for: ERK3/MAPK6 dictates CDC42/RAC1 activity and ARP2/3-dependent actin polymerization
Source: eLife journal article supplement (doi:10.7554/elife.85167), 2023-04-14
Supplement: fig5-figsupp2-data2 [file Figure 5-figure supplement 2C and 2D-source data.xlsx]

## Sheet: Sheet1
Image	Pearson	Spearman	Manders	Kendall		Pearson above	Pearson below
1
2	0.28	0.3062	0.614	0.2092		-0.29	0
3	0.12	0.1561	0.388	0.106		-0.47	0
4	0.23	0.2467	0.601	0.1687		-0.36	0
5	0.19	0.2152	0.448	0.1468		-0.46	0
6	0.12	0.1411	0.412	0.0953		-0.45	-0.01
7	0.22	0.2262	0.591	0.1548		-0.37	0
8	0.47	0.3607	0.854	0.2487		-0.04	0
9	0.4	0.3942	0.756	0.2726		-0.05	0
10	0.38	0.398	0.764	0.2756		-0.06	0
11	0.25	0.2263	0.559	0.1557		-0.33	0
12	0.34	0.3414	0.644	0.232		-0.26	-0.01
13	0.43	0.4057	0.879	0.2761		0.04	0
14
15
16
17
18
19
20
21
22
23
24
25
26
