# Supplementary material for: ERK3/MAPK6 dictates CDC42/RAC1 activity and ARP2/3-dependent actin polymerization
Source: eLife journal article supplement (doi:10.7554/elife.85167), 2023-04-14
Supplement: fig5-figsupp3-data1 [file Figure 5-figure supplement 3-source data.xlsx]

## Sheet: Result sheet
Method name: Actin polymerization (Modified)
Application: SparkControl				V3.1
Device: Spark				Serial number: 2007011179
Firmware:				LUM:V5.2.4|ABS:V4.3.2|ABS_MEX:V5.1.1|MTP:V14.2.11|FLUOR:V5.1.4|FLUOR_BOTTOM:V5.0.2|PODI:V1.11.2
Date:				2021-02-09
Time:				2:33 PM
System				CBUMAINZ-HP
User				CBUMainz-HP\User
Plate				[GRE96fb_chimney] - Greiner 96 Flat Black Cat. No.: 655079/655086/655077/655076
Lid lifter				No lid
Humidity Cassette				No humidity cassette
Smooth mode				Not selected
List of actions in this measurement script:
Plate
	Shaking
	Kinetic
		Fluorescence Top Reading				Actin
Name				GRE96fb_chimney
Plate layout
Plate area				A1-G2;H1
Start Time				2021-02-09 11:57:11
Shaking (Orbital) Duration [s]				5
Shaking (Orbital) Position				Current
Shaking (Orbital) Amplitude [mm]				1
Shaking (Orbital) Frequency [rpm]				510
End Time				2021-02-09 11:57:16
Mode	Kinetic
Kinetic cycles				240
Interval time [hhmmss]				00:00:30
Mode	Fluorescence Top Reading
Name	Actin
Excitation				Filter
Excitation wavelength [nm]				360
Excitation bandwidth [nm]				35
Emission				Filter
Emission wavelength [nm]				415
Emission bandwidth [nm]				20
Gain Manual				50
Mirror				Automatic (50% Mirror)
Number of flashes				30
Integration time [µs]				40
Lag time [µs]				0
Settle time [ms]				0
Z-Position [μm]				17500
Z-Position mode				Manual
Multiple Reads per Well (Circle (filled))				2 x 2
Multiple Reads per Well (Border) [μm]				500
Part of Plate				A1-G2;H1
Start Time				2021-02-09 11:57:22
Actin
1;1	1;2
2;1	2;2
Cycles / Well
A1	1	2	3	4	5	6	7	8	9	10	11	12	13	14	15	16	17	18	19	20	21	22	23	24	25	26	27	28	29	30	31	32	33	34	35	36	37	38	39	40	41	42	43	44	45	46	47	48	49
Time [s]	0	39.661	78.83	117.885	156.986	196.095	235.134	274.274	313.473	352.783	391.898	430.973	470.1	509.201	548.362	587.563	626.734	665.886	704.921	744.142	783.271	822.381	861.489	900.614	939.754	978.828	1017.94	1057.08	1096.25	1135.41	1174.43	1213.49	1252.61	1291.75	1330.86	1369.95	1409.11	1448.17	1487.28	1526.44	1565.64	1604.77	1643.89	1682.94	1722.01	1761.02	1800.11	1839.16	1878.23
Temp. [°C]	25.7	25.7	25.6	25.6	25.6	25.7	25.6	25.7	25.8	25.8	25.8	25.9	25.8	25.9	25.9	25.9	26	26.1	26.1	26.1	26.1	26.1	26.2	26.3	26.3	26.3	26.3	26.3	26.2	26.2	26.3	26.3	26.3	26.4	26.3	26.4	26.4	26.3	26.4	26.3	26.3	26.3	26.4	26.3	26.4	26.4	26.5	26.5	26.4
Mean	7928	7955.5	8179.75	8497.75	8818.5	9164.75	9508.75	9865.75	10236	10574.8	10944.5	11310.8	11632.2	11929.2	12270.8	12568.8	12866.2	13161.5	13490.8	13722.5	14039.2	14217	14483.2	14771.5	14970.2	15219	15371.5	15604.2	15778	15950.2	16160	16347.8	16505.8	16631	16808.2	17008.8	17143.2	17256.5	17471.2	17599.2	17605.8	17843.8	17910.5	18046.2	18100	18185.8	18274.8	18402.2	18538
StDev	567.09	425.833	458.216	449.022	512.261	523.069	544.835	585.294	604.093	636.143	638.245	694.29	741.35	697.136	714.049	747.746	783.388	811.083	793.05	806.646	864.413	824.714	881.374	885.333	905.637	876.579	878.535	883.882	918.664	843.83	913.199	893.939	921.537	916.51	931.897	949.668	940.826	971.421	978.486	962.434	1000.66	984.731	952.019	985.577	989.087	973.966	1014.66	996.361	996.911
1;1	7629	7621	7794	8149	8388	8708	9027	9324	9694	10006	10383	10754	11016	11301	11677	11902	12194	12439	12839	13038	13304	13458	13714	14015	14188	14468	14591	14817	14913	15182	15317	15549	15730	15790	16006	16195	16319	16373	16585	16711	16704	16956	17077	17222	17215	17272	17369	17497	17586
1;2	8483	8329	8577	8871	9254	9597	9972	10340	10713	11132	11476	11844	12282	12509	12857	13195	13566	13836	14120	14417	14849	14877	15166	15562	15696	15959	16059	16328	16573	16641	16829	17028	17241	17334	17527	17768	17826	18000	18231	18334	18360	18590	18643	18888	18888	18863	19086	19136	19200
2;1	7283	7554	7772	8071	8362	8716	9047	9396	9734	10042	10401	10670	10965	11351	11629	11941	12182	12480	12772	13010	13280	13551	13730	13995	14186	14452	14634	14862	15055	15259	15432	15604	15688	15891	16001	16180	16348	16464	16668	16828	16782	17033	17100	17164	17275	17431	17426	17592	17790
2;2	8317	8318	8576	8900	9270	9638	9989	10403	10803	11119	11518	11975	12266	12556	12920	13237	13523	13891	14232	14425	14724	14982	15323	15514	15811	15997	16202	16410	16571	16719	17062	17210	17364	17509	17699	17892	18080	18189	18401	18524	18577	18796	18822	18911	19022	19177	19218	19384	19576
Cycles / Well
Actin	1	2	3	4	5	6	7	8	9	10	11	12	13	14	15	16	17	18	19	20	21	22	23	24	25	26	27	28	29	30	31	32	33	34	35	36	37	38	39	40	41	42	43	44	45	46	47	48	49
Time [s]	0	39.661	78.83	117.885	156.986	196.095	235.134	274.274	313.473	352.783	391.898	430.973	470.1	509.201	548.362	587.563	626.734	665.886	704.921	744.142	783.271	822.381	861.489	900.614	939.754	978.828	1017.94	1057.08	1096.25	1135.41	1174.43	1213.49	1252.61	1291.75	1330.86	1369.95	1409.11	1448.17	1487.28	1526.44	1565.64	1604.77	1643.89	1682.94	1722.01	1761.02	1800.11	1839.16	1878.23
Temp. [°C]	25.7	25.7	25.6	25.6	25.6	25.7	25.7	25.7	25.8	25.8	25.8	25.9	25.9	25.9	25.9	25.9	26	26	26.1	26.1	26.1	26.2	26.2	26.3	26.3	26.3	26.3	26.3	26.2	26.2	26.3	26.3	26.3	26.4	26.3	26.4	26.4	26.3	26.4	26.3	26.3	26.3	26.4	26.3	26.4	26.4	26.5	26.5	26.4
Mean	7207.5	7272.5	7456.25	7705.75	7996.5	8305.5	8595.5	8911	9228.25	9524.75	9873.25	10181.8	10490.2	10835	11145.5	11447.8	11735.8	12029.5	12242.5	12552.2	12824.8	12957.2	13209.8	13424.5	13684.8	13865.5	14066.5	14251.8	14430.5	14588	14781.2	14960.8	15131	15304.2	15460.2	15590	15753.5	15890	16016	16189	16277	16411.8	16546	16620	16710	16831.8	16935	17086.2	17121.2
StDev	342.139	365.629	370.106	409.559	403.12	407.066	432.227	446.834	489.732	467.312	471.146	519.573	530.722	513.601	490.715	511.446	554.115	532.309	605.493	578.706	570.627	662.009	733.158	708.871	666.071	735.659	742.739	762.338	764.546	723.397	752.325	762.735	776.148	810.697	803.505	806.948	784.276	885.445	821.545	877.923	835.666	864.471	869.324	851.836	889.603	820.815	855.479	851.418	905.557
1;1	7003	7075	7247	7444	7704	8006	8262	8570	8856	9142	9493	9741	10048	10495	10824	11157	11431	11720	11791	12238	12497	12370	12573	12797	13192	13197	13432	13566	13741	13963	14062	14283	14394	14556	14690	14833	15045	15048	15296	15346	15456	15626	15742	15794	15867	16063	16058	16323	16315
1;2	7459	7540	7714	7972	8295	8597	8923	9235	9570	9827	10155	10530	10901	11140	11471	11788	12038	12356	12572	12911	13159	13367	13658	13875	14091	14410	14513	14749	14953	15081	15289	15483	15624	15772	15970	16089	16228	16426	16456	16727	16782	16934	17033	17139	17162	17223	17379	17490	17524
2;1	6834	6858	7045	7277	7598	7908	8185	8485	8762	9110	9455	9733	10016	10313	10637	10883	11130	11452	11679	11907	12206	12419	12601	12844	13050	13267	13441	13636	13810	13973	14216	14331	14549	14685	14866	14978	15132	15234	15358	15546	15688	15732	15888	16006	16074	16244	16398	16440	16438
2;2	7534	7617	7819	8130	8389	8711	9012	9354	9725	10020	10390	10723	10996	11392	11650	11963	12344	12590	12928	13153	13437	13673	14007	14182	14406	14588	14880	15056	15218	15335	15558	15746	15957	16204	16315	16460	16609	16852	16954	17137	17182	17355	17521	17541	17737	17797	17905	18092	18208
Cycles / Well
Buffer	1	2	3	4	5	6	7	8	9	10	11	12	13	14	15	16	17	18	19	20	21	22	23	24	25	26	27	28	29	30	31	32	33	34	35	36	37	38	39	40	41	42	43	44	45	46	47	48	49
Time [s]	0	39.661	78.83	117.885	156.986	196.095	235.134	274.274	313.473	352.783	391.898	430.973	470.1	509.201	548.362	587.563	626.734	665.886	704.921	744.142	783.271	822.381	861.489	900.614	939.754	978.828	1017.94	1057.08	1096.25	1135.41	1174.43	1213.49	1252.61	1291.75	1330.86	1369.95	1409.11	1448.17	1487.28	1526.44	1565.64	1604.77	1643.89	1682.94	1722.01	1761.02	1800.11	1839.16	1878.23
Temp. [°C]	25.7	25.7	25.7	25.6	25.6	25.7	25.7	25.7	25.8	25.8	25.8	25.9	25.9	25.9	25.9	26	26	26	26.1	26.1	26.1	26.2	26.2	26.3	26.3	26.3	26.3	26.3	26.3	26.3	26.3	26.3	26.4	26.4	26.3	26.4	26.4	26.3	26.4	26.3	26.4	26.3	26.4	26.3	26.4	26.5	26.5	26.5	26.4
Mean	559.75	569.25	549.5	547.5	540.25	534.5	536.75	535.5	534	533.75	529	528.75	528.75	527.75	526.25	527.75	524.25	525.25	524	522.75	523.5	520.75	520.25	516.75	516.25	515.75	516.5	516.25	512.75	515.25	514	512.75	513	510.75	513.75	513.5	513.5	516	512.5	512.5	513.75	513.25	512.25	511.75	512	512	511.75	513.25	512.75
StDev	583.261	592.045	568.93	576.695	586.957	566.677	557.113	572.054	553.641	569.773	566.506	546.782	555.744	543.824	567.359	558.346	569.313	553.989	544.765	551.201	552.078	568.246	549.56	541.751	554.415	560.736	529.079	550.769	545.18	546.041	546.924	552.586	564.592	564.722	556.473	531.762	556.58	538.09	550.758	529.459	528.415	538.61	534.368	542.95	522.584	542.74	525.329	529.141	536.672
1;1	7538	7450	7442	7446	7414	7406	7445	7398	7411	7387	7382	7390	7399	7356	7328	7363	7386	7344	7365	7340	7367	7313	7348	7357	7291	7289	7322	7295	7312	7273	7306	7277	7275	7282	7293	7275	7289	7270	7268	7287	7248	7232	7246	7247	7258	7255	7242	7284	7216
1;2	8503	8380	8322	8315	8294	8282	8271	8296	8248	8257	8253	8244	8240	8212	8239	8207	8259	8219	8195	8210	8202	8222	8159	8212	8184	8160	8136	8173	8172	8142	8150	8147	8135	8134	8160	8121	8156	8111	8149	8095	8090	8103	8108	8102	8073	8098	8056	8085	8037
2;1	7252	7106	7104	7066	7040	7063	7081	7072	7075	7052	7050	7094	7055	7068	7060	7061	7039	7056	7052	7069	7031	7027	7015	7053	7024	6996	7051	7037	7046	7028	7025	7014	6990	6992	7012	7025	7017	7000	6995	6996	7009	7003	7008	7005	7003	6976	6970	6969	6970
2;2	8228	8139	8113	8096	8105	8064	8099	8076	8081	8082	8066	8071	8059	8034	8061	8097	8054	8039	8044	8057	8033	8024	8041	8000	7995	8011	8022	8019	8025	8009	8025	8012	8039	8049	8021	7975	8031	7973	7964	7966	7956	7958	7953	7993	7954	7961	7925	7933	7973
Cycles / Well
B2	1	2	3	4	5	6	7	8	9	10	11	12	13	14	15	16	17	18	19	20	21	22	23	24	25	26	27	28	29	30	31	32	33	34	35	36	37	38	39	40	41	42	43	44	45	46	47	48	49
Time [s]	0	39.661	78.83	117.885	156.986	196.095	235.134	274.274	313.473	352.783	391.898	430.973	470.1	509.201	548.362	587.563	626.734	665.886	704.921	744.142	783.271	822.381	861.489	900.614	939.754	978.828	1017.94	1057.08	1096.25	1135.41	1174.43	1213.49	1252.61	1291.75	1330.86	1369.95	1409.11	1448.17	1487.28	1526.44	1565.64	1604.77	1643.89	1682.94	1722.01	1761.02	1800.11	1839.16	1878.23
Temp. [°C]	25.7	25.7	25.7	25.6	25.6	25.7	25.7	25.7	25.8	25.8	25.8	25.9	25.9	25.9	25.9	26	26	26	26.1	26.1	26.1	26.2	26.2	26.3	26.3	26.3	26.3	26.3	26.2	26.3	26.3	26.3	26.4	26.4	26.3	26.4	26.4	26.3	26.4	26.3	26.3	26.3	26.4	26.3	26.4	26.5	26.5	26.5	26.4
Mean	7256.25	7360.5	7593.25	7849.25	8142.75	8457.25	8752.75	9137	9440.25	9779	10097.5	10407.8	10730.5	11032.2	11324.2	11653.2	11946.5	12214.8	12474.5	12802.8	13005	13235	13529.8	13759	13955	14179.8	14361.8	14528.5	14776.8	14971.2	15135.8	15314.8	15481.8	15675	15794.5	15963	16128.8	16254.8	16394.5	16505.2	16670.5	16773.2	16838.2	16973.5	17080	17215.2	17348.2	17414.5	17480.8
StDev	436.783	477.238	462.078	498.623	522.637	524.22	534.186	565.434	582.558	612.089	601.302	616.682	646.742	680.631	676.117	712.062	737.156	721.363	754.95	804.549	800.467	828.425	882.468	863.297	880.29	860.332	893.38	937.94	905.492	922.268	984.609	945.886	940.699	982.118	957.443	987.952	1025.26	1005.35	1013.41	1020.88	1048.41	994.021	1056.06	996.295	1029.21	1012.47	1063.51	1026.69	1091.82
1;1	6848	6926	7156	7400	7645	7970	8227	8610	8883	9191	9525	9796	10146	10375	10680	10965	11285	11502	11749	12060	12206	12429	12686	12965	13095	13304	13492	13618	13874	14077	14170	14370	14525	14723	14778	15012	15106	15248	15320	15472	15573	15745	15751	15968	16018	16200	16255	16395	16362
1;2	7597	7732	7943	8202	8531	8848	9138	9583	9883	10264	10532	10888	11157	11503	11785	12105	12434	12692	12938	13358	13502	13786	14157	14314	14584	14755	14951	15114	15377	15531	15758	15902	16123	16292	16406	16561	16688	16883	17101	17195	17306	17414	17469	17546	17750	17883	17984	18008	18041
2;1	6911	6971	7235	7442	7742	8042	8364	8688	8995	9312	9638	9960	10210	10526	10813	11133	11348	11701	11922	12167	12452	12630	12861	13082	13308	13596	13711	13850	14141	14307	14433	14662	14840	14962	15203	15244	15442	15563	15754	15804	16012	16124	16155	16311	16403	16512	16658	16711	16797
2;2	7669	7813	8039	8353	8653	8969	9282	9667	10000	10349	10695	10987	11409	11725	12019	12410	12719	12964	13289	13626	13860	14095	14415	14675	14833	15064	15293	15532	15715	15970	16182	16325	16439	16723	16791	17035	17279	17325	17403	17550	17791	17810	17978	18069	18149	18266	18496	18544	18723
Cycles / Well
C1	1	2	3	4	5	6	7	8	9	10	11	12	13	14	15	16	17	18	19	20	21	22	23	24	25	26	27	28	29	30	31	32	33	34	35	36	37	38	39	40	41	42	43	44	45	46	47	48	49
Time [s]	0	39.661	78.83	117.885	156.986	196.095	235.134	274.274	313.473	352.783	391.898	430.973	470.1	509.201	548.362	587.563	626.734	665.886	704.921	744.142	783.271	822.381	861.489	900.614	939.754	978.828	1017.94	1057.08	1096.25	1135.41	1174.43	1213.49	1252.61	1291.75	1330.86	1369.95	1409.11	1448.17	1487.28	1526.44	1565.64	1604.77	1643.89	1682.94	1722.01	1761.02	1800.11	1839.16	1878.23
Temp. [°C]	25.7	25.7	25.7	25.6	25.6	25.7	25.7	25.7	25.8	25.8	25.8	25.9	25.9	25.9	25.9	26	26	26.1	26.1	26.1	26.1	26.2	26.2	26.3	26.3	26.3	26.3	26.3	26.3	26.3	26.3	26.3	26.4	26.4	26.3	26.4	26.4	26.3	26.4	26.3	26.3	26.3	26.4	26.3	26.4	26.5	26.5	26.5	26.4
Mean	8017.25	8210.25	8454.5	8750.25	9091.5	9418.75	9775.5	10107	10450.8	10822.2	11186.2	11555	11881.5	12207.2	12580	12897.5	13182.8	13495	13798.2	14110.5	14347.2	14613.2	14937	15154	15413	15641.8	15828.8	16047.2	16287.2	16486.5	16655	16812	17002.5	17195.5	17331.2	17505.5	17722	17857	17988.2	18165.5	18264.2	18383.2	18555	18670.2	18758.8	18881.8	18991.5	19103	19236.8
StDev	499.609	519.912	533.124	531.437	592.182	567.005	587.395	617.016	598.835	589.882	630.716	639.918	619.357	635.478	701.276	684.79	717.183	715.995	758.349	731.127	763.284	766.454	794.634	832.748	800.92	850.537	863.929	931.29	925.842	893.124	953.438	985.154	968.06	1036.34	1008.35	1020.65	1060.63	1071.16	1105.06	1061.44	1117.87	1133.35	1093.61	1162.46	1136.17	1242.73	1179.96	1174.75	1204.01
1;1	7653	7841	8101	8405	8704	9043	9394	9735	10079	10451	10804	11190	11580	11853	12191	12491	12797	13186	13375	13766	13937	14152	14445	14656	14903	15091	15219	15368	15541	15792	15852	15957	16190	16247	16411	16617	16822	16936	17001	17216	17174	17321	17514	17633	17691	17738	17927	18018	18114
1;2	8497	8732	8954	9249	9643	9953	10265	10628	10921	11245	11583	12003	12311	12661	13063	13375	13694	13973	14316	14559	14843	15119	15487	15686	15886	16185	16372	16557	16827	17004	17293	17404	17604	17848	18017	18204	18450	18581	18758	18969	19086	19194	19359	19570	19656	19802	19868	20004	20190
2;1	7524	7692	7898	8190	8469	8827	9154	9432	9805	10194	10512	10846	11159	11496	11796	12151	12370	12636	12953	13259	13489	13787	14087	14257	14583	14759	14976	15166	15468	15673	15826	15996	16168	16381	16525	16644	16803	16943	17079	17284	17437	17500	17717	17700	17866	17886	18023	18162	18281
2;2	8395	8576	8865	9157	9550	9852	10289	10633	10998	11399	11846	12181	12476	12819	13270	13573	13870	14185	14549	14858	15120	15395	15729	16017	16280	16532	16748	17098	17313	17477	17649	17891	18048	18306	18372	18557	18813	18968	19115	19193	19360	19518	19630	19778	19822	20101	20148	20228	20362
Cycles / Well
C2	1	2	3	4	5	6	7	8	9	10	11	12	13	14	15	16	17	18	19	20	21	22	23	24	25	26	27	28	29	30	31	32	33	34	35	36	37	38	39	40	41	42	43	44	45	46	47	48	49
Time [s]	0	39.661	78.83	117.885	156.986	196.095	235.134	274.274	313.473	352.783	391.898	430.973	470.1	509.201	548.362	587.563	626.734	665.886	704.921	744.142	783.271	822.381	861.489	900.614	939.754	978.828	1017.94	1057.08	1096.25	1135.41	1174.43	1213.49	1252.61	1291.75	1330.86	1369.95	1409.11	1448.17	1487.28	1526.44	1565.64	1604.77	1643.89	1682.94	1722.01	1761.02	1800.11	1839.16	1878.23
Temp. [°C]	25.7	25.7	25.6	25.6	25.7	25.6	25.7	25.7	25.8	25.8	25.9	25.9	25.9	25.9	25.9	26	26	26.1	26.1	26.1	26.1	26.2	26.2	26.3	26.3	26.3	26.3	26.3	26.2	26.3	26.3	26.3	26.4	26.4	26.3	26.4	26.3	26.3	26.4	26.3	26.3	26.3	26.4	26.4	26.4	26.5	26.5	26.5	26.4
Mean	7273.75	7421.5	7603.25	7849.5	8035.5	8206.5	8397.75	8612.25	8807	9017.25	9244.5	9418.5	9639.75	9834.25	10021.5	10229.2	10457.5	10620.2	10846	11032	11267.5	11409.5	11629.2	11829	11966.5	12162.2	12348.5	12515.2	12715	12878.8	13047	13185.5	13342.5	13550.5	13676	13865	14013	14179.5	14337	14494.2	14656.2	14766	14952.2	15054	15173.5	15299	15447.2	15600.5	15697.8
StDev	437.13	482.455	527.988	560.554	549.154	519.204	536.557	539.381	523.242	518.462	541.483	554.12	551.649	575.908	594.284	607.048	656.499	611.552	622.874	606.97	689.533	645.919	718.608	689.602	720.686	740.534	750.202	744.676	769.844	772.417	748.805	793.082	768.658	814.06	818.112	819.407	822.112	883.641	859.002	861.398	914.206	897.047	904.364	911.97	905.613	867.669	900.952	942.538	975.517
1;1	7148	7196	7285	7523	7730	7874	8053	8286	8520	8723	8932	9065	9315	9464	9680	9821	10016	10244	10481	10637	10839	11020	11222	11401	11477	11698	11867	12015	12188	12372	12580	12651	12846	12980	13075	13305	13488	13569	13763	13848	14022	14159	14338	14375	14559	14671	14833	14929	15005
1;2	7626	7921	8201	8473	8605	8689	8855	9064	9239	9435	9689	9845	10082	10340	10489	10756	11058	11129	11357	11521	11838	11894	12159	12400	12530	12768	12935	13123	13365	13507	13659	13842	13942	14178	14257	14530	14709	14833	14952	15112	15315	15352	15650	15726	15822	15959	16092	16291	16400
2;1	6709	6860	7052	7252	7428	7655	7827	8023	8214	8437	8642	8829	9031	9222	9360	9598	9776	9957	10157	10391	10523	10706	10828	11084	11223	11366	11552	11741	11922	12066	12240	12362	12529	12726	12877	13021	13136	13280	13449	13664	13730	13854	14020	14168	14245	14438	14526	14659	14723
2;2	7612	7709	7875	8150	8379	8608	8856	9076	9255	9474	9715	9935	10131	10311	10557	10742	10980	11151	11389	11579	11870	12018	12308	12431	12636	12817	13040	13182	13385	13570	13709	13887	14053	14318	14495	14604	14719	15036	15184	15353	15558	15699	15801	15947	16068	16128	16338	16523	16663
Cycles / Well
D1	1	2	3	4	5	6	7	8	9	10	11	12	13	14	15	16	17	18	19	20	21	22	23	24	25	26	27	28	29	30	31	32	33	34	35	36	37	38	39	40	41	42	43	44	45	46	47	48	49
Time [s]	0	39.661	78.83	117.885	156.986	196.095	235.134	274.274	313.473	352.783	391.898	430.973	470.1	509.201	548.362	587.563	626.734	665.886	704.921	744.142	783.271	822.381	861.489	900.614	939.754	978.828	1017.94	1057.08	1096.25	1135.41	1174.43	1213.49	1252.61	1291.75	1330.86	1369.95	1409.11	1448.17	1487.28	1526.44	1565.64	1604.77	1643.89	1682.94	1722.01	1761.02	1800.11	1839.16	1878.23
Temp. [°C]	25.7	25.6	25.6	25.6	25.7	25.6	25.7	25.7	25.8	25.8	25.8	25.9	25.9	25.9	25.9	26	26	26.1	26.1	26.1	26.1	26.2	26.2	26.3	26.3	26.3	26.3	26.3	26.2	26.3	26.3	26.3	26.4	26.4	26.3	26.3	26.3	26.4	26.4	26.3	26.3	26.3	26.4	26.4	26.4	26.5	26.5	26.5	26.5
Mean	7903.5	8116	8341.5	8611.25	8907.75	9156	9425.75	9708.5	9960.75	10234	10519.2	10778.5	11021	11283.5	11539.8	11790.8	12012.5	12274.2	12529.8	12735	12975.5	13207.2	13424.2	13647	13887.8	14082	14316.2	14541.5	14718.2	14877.5	15083.5	15279	15449.8	15635.8	15841.8	15999.5	16153.5	16368.2	16547.2	16687	16849.8	16975	17097	17330.2	17406.2	17564	17711.5	17829.8	17984
StDev	589.608	610.107	588.552	585.126	597.787	623.84	623.968	652.299	677.001	692.819	721.697	696.737	746.31	730.484	760.645	783.327	784.91	823.835	824.422	821.303	854.219	877.912	902.26	924.535	927.155	910.668	940.539	958.017	990.166	996.34	977.508	995.849	1010.98	1033.28	1058.46	1058.9	1068.31	1054.79	1097.47	1091.33	1103.55	1102.41	1143.43	1185.99	1159.2	1197.27	1177.18	1221.76	1181.85
1;1	7698	7855	8102	8374	8661	8879	9172	9399	9628	9900	10166	10377	10656	10903	11106	11399	11567	11828	12092	12353	12555	12752	12923	13209	13379	13633	13856	14059	14258	14428	14587	14779	14944	15125	15321	15481	15626	15822	15941	16097	16264	16375	16424	16672	16827	16916	17152	17162	17316
1;2	8571	8829	8997	9281	9614	9877	10129	10459	10722	11019	11344	11533	11859	12091	12346	12628	12859	13156	13440	13604	13913	14154	14388	14679	14875	15095	15335	15603	15797	15995	16124	16328	16544	16731	16968	17173	17314	17517	17708	17869	18006	18189	18296	18601	18656	18828	19001	19148	19262
2;1	7199	7422	7651	7932	8227	8448	8697	8978	9202	9456	9715	10026	10183	10473	10710	10902	11159	11362	11620	11783	12010	12224	12433	12598	12864	13058	13247	13469	13580	13736	13978	14146	14307	14457	14634	14805	14943	15190	15336	15482	15613	15767	15861	16028	16094	16233	16368	16484	16698
2;2	8146	8358	8616	8858	9129	9420	9705	9998	10291	10561	10852	11178	11386	11667	11997	12234	12465	12751	12967	13200	13424	13699	13953	14102	14433	14542	14827	15035	15238	15351	15645	15863	16004	16230	16444	16539	16731	16944	17204	17300	17516	17569	17807	18020	18048	18279	18325	18525	18660
Cycles / Well
Actin+ERK3 4,.8nM+ARP2/3+VCA	1	2	3	4	5	6	7	8	9	10	11	12	13	14	15	16	17	18	19	20	21	22	23	24	25	26	27	28	29	30	31	32	33	34	35	36	37	38	39	40	41	42	43	44	45	46	47	48	49
Time [s]	0	39.661	78.83	117.885	156.986	196.095	235.134	274.274	313.473	352.783	391.898	430.973	470.1	509.201	548.362	587.563	626.734	665.886	704.921	744.142	783.271	822.381	861.489	900.614	939.754	978.828	1017.94	1057.08	1096.25	1135.41	1174.43	1213.49	1252.61	1291.75	1330.86	1369.95	1409.11	1448.17	1487.28	1526.44	1565.64	1604.77	1643.89	1682.94	1722.01	1761.02	1800.11	1839.16	1878.23
Temp. [°C]	25.7	25.7	25.6	25.6	25.7	25.6	25.7	25.7	25.8	25.8	25.9	25.9	25.9	25.9	25.9	26	26.1	26.1	26.1	26.1	26.1	26.2	26.2	26.3	26.3	26.3	26.3	26.3	26.2	26.3	26.3	26.3	26.4	26.4	26.3	26.4	26.3	26.3	26.4	26.3	26.3	26.3	26.4	26.4	26.4	26.5	26.5	26.5	26.4
Mean	6934.5	7066.5	7251	7469	7716.25	7945	8195.5	8453.75	8693.5	8953.25	9181.25	9422.5	9669.25	9905.5	10128.2	10394.2	10588.5	10831	11084.8	11275.8	11461.2	11721.8	11891.5	12135.5	12363.2	12552.8	12738.2	12958.5	13150.8	13339.2	13514	13711.2	13884.5	14066.5	14261	14408.8	14576.2	14771	14963.8	15155.8	15245	15427.8	15568.8	15758.5	15888.8	16005.5	16171.2	16341.8	16423
StDev	489.646	503.864	462.911	506.581	509.892	531.937	552.582	536.599	560.001	593.374	594.402	610.177	638.844	689.578	698.552	699.165	711.234	698.779	747.601	754.438	771.533	778.33	760.84	799.849	837.086	823.944	864.816	823.421	835.77	788.832	881.049	838.996	880.646	832.49	819.57	839.964	865.33	910.565	946.187	958.906	1004.79	962.774	988.36	1066.36	1094.45	1109.43	1065.67	1153.55	1141.27
1;1	6640	6723	6932	7118	7399	7588	7794	8092	8309	8540	8736	8987	9196	9382	9599	9887	10038	10339	10537	10758	10844	11132	11326	11556	11707	11931	12105	12339	12523	12755	12824	13122	13210	13420	13672	13797	13956	14143	14297	14474	14495	14758	14851	14996	15077	15138	15416	15469	15531
1;2	7449	7580	7728	8013	8240	8507	8754	8997	9240	9554	9746	10040	10291	10585	10808	11047	11230	11498	11783	11946	12191	12423	12594	12897	13144	13363	13524	13728	13884	14031	14308	14397	14693	14805	14972	15078	15319	15571	15798	15993	16079	16231	16426	16681	16830	16987	17166	17437	17432
2;1	6410	6554	6784	6965	7175	7404	7653	7904	8122	8356	8604	8817	9046	9245	9457	9700	9911	10126	10347	10500	10747	10969	11147	11342	11575	11760	11883	12160	12337	12564	12682	12860	13040	13275	13440	13576	13708	13837	14005	14189	14263	14445	14585	14687	14814	14956	15098	15229	15343
2;2	7239	7409	7560	7780	8051	8281	8581	8822	9103	9363	9639	9846	10144	10410	10649	10943	11175	11361	11672	11899	12063	12363	12499	12747	13027	13157	13441	13607	13859	14007	14242	14466	14595	14766	14960	15184	15322	15533	15755	15967	16143	16277	16413	16670	16834	16941	17005	17232	17386
Cycles / Well
Actin+ARP2/3+WASP (VCA)	1	2	3	4	5	6	7	8	9	10	11	12	13	14	15	16	17	18	19	20	21	22	23	24	25	26	27	28	29	30	31	32	33	34	35	36	37	38	39	40	41	42	43	44	45	46	47	48	49
Time [s]	0	39.661	78.83	117.885	156.986	196.095	235.134	274.274	313.473	352.783	391.898	430.973	470.1	509.201	548.362	587.563	626.734	665.886	704.921	744.142	783.271	822.381	861.489	900.614	939.754	978.828	1017.94	1057.08	1096.25	1135.41	1174.43	1213.49	1252.61	1291.75	1330.86	1369.95	1409.11	1448.17	1487.28	1526.44	1565.64	1604.77	1643.89	1682.94	1722.01	1761.02	1800.11	1839.16	1878.23
Temp. [°C]	25.7	25.6	25.6	25.6	25.7	25.6	25.7	25.7	25.8	25.8	25.8	25.9	25.9	25.9	26	26	26	26.1	26.1	26.1	26.1	26.2	26.2	26.3	26.3	26.3	26.3	26.3	26.2	26.3	26.3	26.3	26.4	26.4	26.3	26.3	26.4	26.5	26.3	26.3	26.3	26.3	26.3	26.4	26.4	26.5	26.5	26.5	26.5
Mean	7353.25	7565.75	7801.5	8076.25	8346.25	8595.5	8884.5	9131.25	9414.75	9663	9952.75	10184	10436.8	10689	10939.8	11227.5	11459.5	11674	11939.2	12176.5	12364.2	12631.2	12899.5	13055.8	13347.2	13477.8	13735.5	13967.2	14144	14334.2	14561.5	14728.2	14954.2	15124.5	15361.5	15573.2	15711	15942	16062	16294	16446.8	16568.5	16779.2	16947.8	17102	17233	17342.8	17528	17699.8
StDev	602.746	592.286	592.983	590.123	590.436	620.88	640.802	662.103	650.499	681.888	692.232	736.933	755.308	721.347	746.216	780.245	838.284	812.668	861.265	862.96	870.998	936.025	948.488	925.285	956.882	976.205	991.413	981.552	986.883	1031.96	1020.61	1039.28	1058.76	1087.44	1082.02	1118.12	1124.24	1109.79	1148.65	1199.6	1222.87	1172.49	1212.76	1276.74	1315.26	1286.75	1305.89	1290.74	1260.75
1;1	7142	7299	7507	7805	8094	8313	8559	8797	9069	9269	9600	9798	10012	10298	10473	10791	10980	11212	11423	11704	11872	12076	12368	12526	12868	12929	13187	13356	13563	13690	13910	14047	14251	14454	14683	14841	14942	15201	15266	15426	15596	15778	15951	16091	16220	16312	16463	16655	16876
1;2	8057	8276	8513	8761	9064	9322	9637	9902	10156	10460	10732	11045	11297	11511	11799	12094	12413	12551	12890	13136	13329	13626	13861	14079	14363	14511	14777	15037	15200	15372	15621	15794	16074	16243	16491	16755	16832	17074	17276	17575	17742	17819	18071	18296	18518	18653	18754	18922	19089
2;1	6644	6909	7160	7413	7690	7899	8187	8406	8706	8950	9185	9387	9629	9908	10179	10383	10568	10791	11029	11236	11424	11626	11848	12061	12260	12407	12640	12942	13083	13236	13493	13651	13872	13966	14221	14422	14565	14801	14914	15129	15228	15382	15560	15649	15771	15989	16026	16229	16417
2;2	7570	7779	8026	8326	8537	8848	9155	9420	9728	9973	10294	10506	10809	11039	11308	11642	11877	12142	12415	12630	12832	13197	13521	13557	13898	14064	14338	14534	14730	15039	15222	15421	15620	15835	16051	16275	16505	16692	16792	17046	17221	17295	17535	17755	17899	17978	18128	18306	18417
Cycles / Well
E2	1	2	3	4	5	6	7	8	9	10	11	12	13	14	15	16	17	18	19	20	21	22	23	24	25	26	27	28	29	30	31	32	33	34	35	36	37	38	39	40	41	42	43	44	45	46	47	48	49
Time [s]	0	39.661	78.83	117.885	156.986	196.095	235.134	274.274	313.473	352.783	391.898	430.973	470.1	509.201	548.362	587.563	626.734	665.886	704.921	744.142	783.271	822.381	861.489	900.614	939.754	978.828	1017.94	1057.08	1096.25	1135.41	1174.43	1213.49	1252.61	1291.75	1330.86	1369.95	1409.11	1448.17	1487.28	1526.44	1565.64	1604.77	1643.89	1682.94	1722.01	1761.02	1800.11	1839.16	1878.23
Temp. [°C]	25.7	25.6	25.6	25.6	25.7	25.6	25.7	25.7	25.8	25.8	25.8	25.8	25.9	25.9	26	26	26	26.1	26.1	26.1	26.1	26.2	26.2	26.3	26.3	26.3	26.3	26.3	26.2	26.3	26.3	26.3	26.4	26.4	26.3	26.3	26.4	26.5	26.3	26.3	26.3	26.3	26.3	26.4	26.4	26.5	26.5	26.5	26.5
Mean	7487.5	7648.75	7849.5	8104.25	8362.5	8631.75	8879	9102.25	9357.75	9633.5	9890	10161	10404.5	10655	10903	11085.8	11370.2	11608.5	11844	12069.8	12265.5	12478	12734.8	12918.2	13176.8	13361.5	13545.8	13738.5	13978.5	14185.2	14358.8	14609.8	14730	14985.8	15112	15335	15457.2	15597.2	15792.8	15957.5	16131.2	16219	16447	16578.5	16693.2	16846	17012.8	17124.8	17300
StDev	531.04	533.171	556.13	565.916	606.081	579.438	628.43	620.079	629.475	661.184	687.419	676.948	653.644	757.612	724.764	700.889	730.986	741.088	799.188	775.632	793.235	797.106	790.484	849.866	864.845	856.511	878.072	899.959	909.041	930.867	923.338	974.812	972.708	1004.38	940.317	1027.82	970.041	1036.17	1105.62	1039.68	1058.38	1034.6	1134.93	1078.75	1177.31	1057.63	1099.34	1158.39	1190.3
1;1	7518	7658	7873	8101	8435	8683	8901	9045	9332	9578	9871	10197	10429	10609	10909	11068	11407	11612	11846	12075	12246	12442	12731	12864	13250	13330	13488	13662	13922	14120	14287	14497	14639	14886	15008	15231	15403	15419	15653	15897	16013	16023	16324	16446	16456	16751	16812	16951	17138
1;2	8038	8232	8468	8727	9013	9270	9539	9813	10014	10354	10621	10882	11045	11432	11651	11780	12109	12359	12664	12863	13069	13349	13549	13800	14019	14238	14426	14689	14963	15148	15310	15571	15749	16042	16077	16401	16447	16676	16948	16998	17218	17352	17618	17766	17911	17953	18206	18348	18585
2;1	6765	6942	7117	7358	7547	7863	8030	8311	8514	8768	8973	9250	9502	9638	9921	10130	10368	10599	10760	11016	11190	11429	11665	11782	11974	12206	12361	12547	12781	12941	13125	13304	13441	13658	13863	13971	14152	14247	14337	14552	14726	14899	14941	15183	15169	15443	15603	15613	15753
2;2	7629	7763	7940	8231	8455	8711	9046	9240	9571	9834	10095	10315	10642	10941	11131	11365	11597	11864	12106	12325	12557	12692	12994	13227	13464	13672	13908	14056	14248	14532	14713	15067	15091	15357	15500	15737	15827	16047	16233	16383	16568	16602	16905	16919	17237	17237	17430	17587	17724
Cycles / Well
F1	1	2	3	4	5	6	7	8	9	10	11	12	13	14	15	16	17	18	19	20	21	22	23	24	25	26	27	28	29	30	31	32	33	34	35	36	37	38	39	40	41	42	43	44	45	46	47	48	49
Time [s]	0	39.661	78.83	117.885	156.986	196.095	235.134	274.274	313.473	352.783	391.898	430.973	470.1	509.201	548.362	587.563	626.734	665.886	704.921	744.142	783.271	822.381	861.489	900.614	939.754	978.828	1017.94	1057.08	1096.25	1135.41	1174.43	1213.49	1252.61	1291.75	1330.86	1369.95	1409.11	1448.17	1487.28	1526.44	1565.64	1604.77	1643.89	1682.94	1722.01	1761.02	1800.11	1839.16	1878.23
Temp. [°C]	25.7	25.6	25.6	25.6	25.7	25.6	25.7	25.7	25.8	25.8	25.8	25.8	25.8	25.9	25.9	26	26	26.1	26.1	26.1	26.1	26.2	26.2	26.3	26.2	26.3	26.3	26.3	26.2	26.3	26.3	26.3	26.4	26.3	26.4	26.3	26.3	26.4	26.3	26.3	26.3	26.3	26.3	26.3	26.4	26.5	26.5	26.5	26.5
Mean	7716	7897	8118.5	8364.25	8653	8928.75	9243	9522.75	9873	10135.5	10434.2	10729.2	11044.2	11318.5	11622	11877.2	12183.8	12442.5	12705	12951.2	13220	13493.5	13703.8	13915.8	14188	14363.8	14578.2	14823.8	15010.8	15201.8	15378	15534	15744.2	15954	16086.8	16292.8	16440	16644.5	16689.2	16872.2	17012.2	17173	17309	17532.8	17568	17642.2	17774	17919.5	18087.5
StDev	556.118	569.639	568.691	571.187	606.775	632.711	674.085	658.564	707.578	705.185	732.745	796.357	788.796	825.691	855.928	861.13	906.216	897.172	931.484	954.57	987.766	990.919	996.866	982.09	1017.5	998.657	1049.71	1041.98	1100.12	1100.8	1108.47	1082.42	1114.83	1173.37	1141.52	1193.5	1190.16	1221.91	1177.62	1195.84	1249.62	1227.19	1262.04	1172.14	1225.61	1286.71	1290.95	1271.48	1310.67
1;1	7487	7635	7878	8128	8385	8643	8927	9226	9500	9822	10065	10341	10609	10886	11154	11460	11694	11994	12238	12410	12697	12964	13152	13390	13615	13790	14009	14282	14384	14567	14753	14971	15148	15313	15477	15632	15791	15968	16016	16247	16327	16605	16665	16841	16868	16992	17094	17221	17437
1;2	8396	8599	8803	9039	9395	9681	10064	10320	10715	10958	11295	11673	11967	12300	12651	12925	13254	13497	13777	14077	14415	14646	14883	15055	15360	15524	15816	16002	16236	16450	16685	16732	16984	17258	17390	17685	17789	18075	18055	18238	18407	18522	18692	18878	18934	19073	19163	19351	19513
2;1	7096	7280	7481	7714	7986	8224	8510	8797	9117	9339	9635	9857	10206	10434	10724	10948	11219	11462	11677	11951	12177	12426	12652	12857	13106	13314	13461	13677	13829	14033	14214	14333	14520	14674	14846	15024	15151	15348	15448	15564	15653	15765	15896	16306	16253	16205	16334	16542	16605
2;2	7885	8074	8312	8576	8846	9167	9471	9748	10160	10423	10742	11046	11395	11654	11959	12176	12568	12817	13128	13367	13591	13938	14128	14361	14671	14827	15027	15334	15594	15757	15860	16100	16325	16571	16634	16830	17029	17187	17238	17440	17662	17800	17983	18106	18217	18299	18505	18564	18795
Cycles / Well
Actin+ARP2/3	1	2	3	4	5	6	7	8	9	10	11	12	13	14	15	16	17	18	19	20	21	22	23	24	25	26	27	28	29	30	31	32	33	34	35	36	37	38	39	40	41	42	43	44	45	46	47	48	49
Time [s]	0	39.661	78.83	117.885	156.986	196.095	235.134	274.274	313.473	352.783	391.898	430.973	470.1	509.201	548.362	587.563	626.734	665.886	704.921	744.142	783.271	822.381	861.489	900.614	939.754	978.828	1017.94	1057.08	1096.25	1135.41	1174.43	1213.49	1252.61	1291.75	1330.86	1369.95	1409.11	1448.17	1487.28	1526.44	1565.64	1604.77	1643.89	1682.94	1722.01	1761.02	1800.11	1839.16	1878.23
Temp. [°C]	25.7	25.6	25.6	25.6	25.7	25.6	25.7	25.7	25.8	25.8	25.8	25.8	25.8	25.9	25.9	26	26	26.1	26.1	26.1	26.1	26.2	26.2	26.3	26.3	26.3	26.3	26.3	26.2	26.3	26.3	26.3	26.4	26.4	26.4	26.3	26.4	26.5	26.3	26.3	26.3	26.3	26.4	26.3	26.4	26.5	26.5	26.5	26.5
Mean	7352.25	7534.25	7729	7974.25	8246.75	8518.25	8829.25	9143.75	9423.25	9757.25	10068	10351.8	10640.8	10902.8	11239.5	11531.8	11797.2	12103.8	12381.8	12609.2	12887	13131	13361	13598	13851	14032.2	14316.2	14482.2	14692.8	14886.5	15087.8	15232.8	15463.8	15645.5	15816.8	15998.8	16135.8	16293.2	16411	16589.2	16696.8	16874.5	16969.5	17087	17199.2	17334	17441.8	17564.2	17698
StDev	607.407	640.466	633.915	677.267	673.275	698.032	716.537	735.219	757.294	798.795	821.757	837.898	893.839	867.602	888.154	946.845	964.295	980.427	969.724	1020.03	1004.39	1063	1073.7	1075.43	1069.97	1144.71	1125.68	1144.65	1182.21	1209.85	1212.03	1231.89	1243.48	1275.87	1283.14	1358.65	1316.17	1312.05	1365.44	1352.99	1392.48	1387.76	1454.51	1399.55	1450.89	1397.92	1485.67	1468.51	1509.33
1;1	7102	7329	7494	7708	7966	8250	8535	8852	9118	9425	9701	9973	10222	10482	10851	11096	11351	11645	11924	12110	12426	12656	12870	13096	13318	13410	13789	13926	14146	14282	14486	14546	14812	14931	15127	15207	15381	15598	15618	15879	15962	16088	16173	16318	16411	16605	16570	16690	16913
1;2	8108	8348	8500	8807	9089	9384	9731	10086	10363	10762	11121	11388	11747	11973	12309	12684	12979	13279	13501	13836	14071	14389	14633	14815	15066	15346	15623	15768	16121	16281	16453	16656	16899	17147	17298	17570	17699	17817	17985	18153	18266	18486	18714	18749	18898	18991	19175	19255	19489
2;1	6684	6817	7007	7216	7511	7739	8048	8351	8585	8888	9202	9443	9680	9976	10251	10497	10750	11026	11296	11503	11767	11941	12166	12380	12661	12798	13057	13195	13396	13551	13734	13920	14111	14301	14432	14575	14768	14875	14976	15119	15169	15408	15442	15610	15650	15832	15896	16035	16076
2;2	7515	7643	7915	8166	8421	8700	9003	9286	9627	9954	10248	10603	10914	11180	11547	11850	12109	12465	12806	12988	13284	13538	13775	14101	14359	14575	14796	15040	15108	15432	15678	15809	16033	16203	16410	16643	16695	16883	17065	17206	17390	17516	17549	17671	17838	17908	18126	18277	18314
Cycles / Well
G1	1	2	3	4	5	6	7	8	9	10	11	12	13	14	15	16	17	18	19	20	21	22	23	24	25	26	27	28	29	30	31	32	33	34	35	36	37	38	39	40	41	42	43	44	45	46	47	48	49
Time [s]	0	39.661	78.83	117.885	156.986	196.095	235.134	274.274	313.473	352.783	391.898	430.973	470.1	509.201	548.362	587.563	626.734	665.886	704.921	744.142	783.271	822.381	861.489	900.614	939.754	978.828	1017.94	1057.08	1096.25	1135.41	1174.43	1213.49	1252.61	1291.75	1330.86	1369.95	1409.11	1448.17	1487.28	1526.44	1565.64	1604.77	1643.89	1682.94	1722.01	1761.02	1800.11	1839.16	1878.23
Temp. [°C]	25.7	25.6	25.6	25.6	25.7	25.6	25.8	25.8	25.8	25.8	25.8	25.8	25.8	25.9	25.9	26	26	26.1	26.1	26.1	26.1	26.2	26.2	26.3	26.2	26.3	26.3	26.2	26.2	26.2	26.3	26.3	26.4	26.3	26.4	26.3	26.3	26.4	26.3	26.3	26.3	26.3	26.3	26.3	26.4	26.5	26.5	26.5	26.5
Mean	7630.25	7833.75	8089	8393.5	8740	9033.25	9362.5	9669.25	10036	10362.8	10692	11059.5	11336	11688.2	11963.2	12295	12587.8	12866.5	13188.2	13377.8	13663.8	13932	14165	14365	14670.8	14890.2	15063.8	15246.2	15459.5	15686.5	15875	16005.2	16189.8	16362.2	16523.8	16703.8	16844.8	17057	17146	17307.8	17421.8	17604	17677.8	17777.8	17891	18028	18130.2	18212	18321.8
StDev	674.834	734.391	755.372	788.123	824.071	865.09	898.326	932.371	970.207	1022.38	1023.38	1066.27	1077.03	1139.02	1151.53	1174.1	1168.27	1212.07	1207.05	1224.33	1232.88	1238.6	1315.99	1312.55	1317.71	1320.06	1334.88	1368.58	1375.01	1365.18	1400.88	1369.54	1398.08	1444.78	1443.25	1433.58	1491.3	1490.52	1502.15	1544.21	1484.99	1523.12	1569.86	1534.69	1561.17	1592.1	1603.96	1599.74	1627.89
1;1	7462	7528	7793	8102	8438	8623	9005	9259	9624	9926	10248	10655	10916	11267	11487	11858	12218	12437	12769	12861	13202	13424	13607	13767	14027	14385	14501	14628	14885	15095	15249	15451	15565	15728	15905	16109	16185	16415	16519	16638	16756	16934	16987	17106	17147	17342	17380	17562	17644
1;2	8500	8792	9078	9409	9808	10146	10518	10886	11276	11675	12000	12405	12704	13109	13426	13783	14063	14391	14699	14894	15204	15470	15856	16011	16336	16518	16721	16970	17165	17393	17636	17739	17938	18108	18315	18454	18704	18883	18951	19259	19227	19483	19635	19672	19814	19983	20104	20157	20322
2;1	6870	7064	7292	7539	7851	8138	8398	8703	9000	9277	9604	9884	10161	10415	10720	11002	11270	11513	11831	12032	12290	12566	12767	12960	13294	13409	13599	13784	13947	14205	14372	14516	14683	14759	14945	15106	15230	15412	15456	15648	15788	15939	15976	16099	16214	16274	16398	16417	16517
2;2	7689	7951	8193	8524	8863	9226	9529	9829	10244	10573	10916	11294	11563	11962	12220	12537	12800	13125	13454	13724	13959	14268	14430	14722	15026	15249	15434	15603	15841	16053	16243	16315	16573	16854	16930	17146	17260	17518	17658	17686	17916	18060	18113	18234	18389	18513	18639	18712	18804
Cycles / Well
G2	1	2	3	4	5	6	7	8	9	10	11	12	13	14	15	16	17	18	19	20	21	22	23	24	25	26	27	28	29	30	31	32	33	34	35	36	37	38	39	40	41	42	43	44	45	46	47	48	49
Time [s]	0	39.661	78.83	117.885	156.986	196.095	235.134	274.274	313.473	352.783	391.898	430.973	470.1	509.201	548.362	587.563	626.734	665.886	704.921	744.142	783.271	822.381	861.489	900.614	939.754	978.828	1017.94	1057.08	1096.25	1135.41	1174.43	1213.49	1252.61	1291.75	1330.86	1369.95	1409.11	1448.17	1487.28	1526.44	1565.64	1604.77	1643.89	1682.94	1722.01	1761.02	1800.11	1839.16	1878.23
Temp. [°C]	25.7	25.6	25.6	25.6	25.7	25.6	25.8	25.8	25.8	25.8	25.9	25.8	25.8	25.9	25.9	26	26	26.1	26.1	26.1	26.1	26.2	26.2	26.2	26.3	26.3	26.3	26.2	26.2	26.2	26.3	26.3	26.4	26.3	26.4	26.3	26.3	26.4	26.3	26.3	26.3	26.3	26.3	26.4	26.4	26.5	26.5	26.4	26.5
Mean	5091.75	5016.75	4970.25	4961.5	4983.25	4982.5	5010.5	5019.25	5059.5	5083.5	5108.25	5165.5	5231.5	5267.25	5309.75	5373.5	5396.5	5447.75	5504	5512.5	5579.5	5596.75	5660.75	5683.25	5721.25	5751.75	5803	5829.25	5852	5912.5	5911	5956.5	5973.5	6009.75	6028.75	6069.75	6099.25	6121	6138	6165.75	6212.5	6236	6256.5	6292.5	6302.75	6321.25	6342	6373.75	6392.25
StDev	505.479	486.353	469.322	485.876	499.808	501.404	457.215	436.312	445.571	462.708	455.881	464.45	477.085	474.037	482.742	487.646	487.291	474.666	503.56	487.09	512.186	505.762	514.32	502.408	519.605	524.649	518.233	514.952	521.266	547.439	527.442	526.957	539.04	533.973	529.765	538.845	539.112	538.784	542.462	536.622	543.932	555.678	561.649	567.571	566.249	547.751	560.112	573.329	545.32
1;1	5213	5117	5065	5053	5085	5049	5142	5176	5217	5266	5233	5265	5291	5302	5359	5467	5477	5504	5567	5585	5639	5700	5738	5739	5819	5824	5903	5886	5946	5986	5982	6015	6083	6061	6103	6131	6156	6175	6191	6206	6252	6288	6281	6331	6337	6377	6390	6427	6460
1;2	5646	5575	5503	5509	5535	5540	5438	5381	5401	5461	5536	5642	5736	5793	5832	5889	5898	5945	6059	6013	6105	6108	6195	6198	6246	6291	6327	6386	6402	6476	6456	6507	6499	6569	6579	6627	6681	6688	6695	6727	6791	6822	6840	6871	6909	6892	6905	6963	6937
2;1	4425	4395	4364	4329	4324	4321	4363	4385	4404	4410	4463	4528	4585	4641	4663	4713	4728	4802	4836	4844	4877	4898	4958	4994	5003	5032	5087	5139	5145	5162	5189	5239	5219	5284	5305	5333	5376	5390	5395	5437	5479	5483	5494	5515	5542	5575	5570	5589	5637
2;2	5083	4980	4949	4955	4989	5020	5099	5135	5216	5197	5201	5227	5314	5333	5385	5425	5483	5540	5554	5608	5697	5681	5752	5802	5817	5860	5895	5906	5915	6026	6017	6065	6093	6125	6128	6188	6184	6231	6271	6293	6328	6351	6411	6453	6423	6441	6503	6516	6535
Cycles / Well
Actin+ERK3 4.8nM+ARP2/3	1	2	3	4	5	6	7	8	9	10	11	12	13	14	15	16	17	18	19	20	21	22	23	24	25	26	27	28	29	30	31	32	33	34	35	36	37	38	39	40	41	42	43	44	45	46	47	48	49
Time [s]	0	39.661	78.83	117.885	156.986	196.095	235.134	274.274	313.473	352.783	391.898	430.973	470.1	509.201	548.362	587.563	626.734	665.886	704.921	744.142	783.271	822.381	861.489	900.614	939.754	978.828	1017.94	1057.08	1096.25	1135.41	1174.43	1213.49	1252.61	1291.75	1330.86	1369.95	1409.11	1448.17	1487.28	1526.44	1565.64	1604.77	1643.89	1682.94	1722.01	1761.02	1800.11	1839.16	1878.23
Temp. [°C]	25.7	25.6	25.6	25.6	25.7	25.6	25.8	25.8	25.8	25.8	25.9	25.8	25.8	25.9	25.9	26	26	26.1	26.1	26.1	26.1	26.2	26.3	26.3	26.3	26.3	26.3	26.2	26.2	26.2	26.3	26.3	26.5	26.3	26.4	26.3	26.3	26.4	26.3	26.3	26.3	26.3	26.3	26.4	26.4	26.5	26.5	26.4	26.5
Mean	8459.25	8641.75	8896.75	9230.75	9597.5	9950	10293.2	10703.8	11085	11431.5	11818.5	12193	12587.8	12958.5	13326.2	13717	14026.8	14395	14722.8	15018	15283	15562	15862.2	16078.2	16371	16620.8	16849.8	17129	17380.8	17584	17791.5	18004.2	18221	18462.5	18653.5	18907	19075.5	19252	19420	19564.8	19778.8	19947.2	20100.8	20223.2	20361.2	20481.8	20634.8	20821.2	20949
StDev	494.379	466.119	539.654	549.279	593.777	596.679	604.905	640.026	675.805	633.227	630.688	645.912	624.668	629.108	612.281	649.421	592.448	615.991	647.687	689.073	734.754	778.377	827.6	844.816	901.174	892.117	927.172	919.124	964.292	954.304	918.646	980.703	979.506	1011.73	1041.42	990.726	1026.93	1038.41	1013.12	1033.6	1023.98	1088.12	1071.86	1068.6	1053.17	1069.4	1044.66	1097.87	1102.6
1;1	8707	8609	8897	9226	9555	9913	10214	10643	11053	11422	11772	12053	12516	12838	13172	13518	13905	14301	14590	14853	15157	15444	15753	16016	16287	16531	16661	17106	17244	17562	17710	18007	18164	18461	18579	18782	19026	19227	19437	19482	19724	19902	20066	20171	20321	20418	20745	20772	20783
1;2	8991	9268	9577	9895	10358	10701	11061	11531	11935	12209	12621	13063	13428	13837	14182	14633	14860	15232	15617	15960	16283	16607	16948	17167	17533	17762	18032	18257	18615	18737	18963	19195	19469	19724	19957	20166	20357	20500	20641	20825	20999	21218	21395	21470	21602	21716	21823	22106	22258
2;1	7863	8142	8257	8550	8907	9241	9585	9969	10281	10658	11079	11505	11917	12341	12728	13104	13458	13747	14067	14307	14513	14723	14934	15104	15333	15583	15782	16006	16264	16401	16718	16793	17074	17247	17409	17748	17843	17959	18160	18299	18498	18565	18772	18866	19031	19116	19276	19429	19586
2;2	8276	8548	8856	9252	9570	9945	10313	10672	11071	11437	11802	12151	12490	12818	13223	13613	13884	14300	14617	14952	15179	15474	15814	16026	16331	16607	16924	17147	17400	17636	17775	18022	18177	18418	18669	18932	19076	19322	19442	19653	19894	20104	20170	20386	20491	20677	20695	20978	21169
End Time				2021-02-09 14:33:09
[truncated: 431 more columns]
