# Supplementary material for: ERK3/MAPK6 dictates CDC42/RAC1 activity and ARP2/3-dependent actin polymerization
Source: eLife journal article supplement (doi:10.7554/elife.85167), 2023-04-14
Supplement: fig6-data2 [file Figure 6B-source data.xlsx]

## Sheet: Result sheet
Method name: Method 1
Application: SparkControl				V3.1
Device: Spark				Serial number: 2007011179
Firmware:				LUM:V5.2.4|ABS:V4.3.2|ABS_MEX:V5.1.1|MTP:V14.2.11|FLUOR:V5.1.4|FLUOR_BOTTOM:V5.0.2|PODI:V1.11.2
Date:				2021-02-03
Time:				3:58 PM
System				CBUMAINZ-HP
User				CBUMainz-HP\User
Plate				[GRE96ft] - Greiner 96 Flat Transparent Cat. No.: 655101/655161/655192
Lid lifter				No lid
Humidity Cassette				No humidity cassette
Smooth mode				Not selected
List of actions in this measurement script:
Plate
	Absorbance					Label 1
Name				GRE96ft
Plate layout
Plate area				D1-G12
Mode	Absorbance
Name	Label 1
Measurement wavelength [nm]				450
Reference wavelength [nm]				570
Number of flashes				10
Settle time [ms]				50
Part of Plate				D1-G12
Start Time				2021-02-03 15:57:53
Temperature [°C]				28.1
<>	1	2	3	4	5	6	7	8	9	10	11	12		Bait protein	Interactin protein	1st Ab	Abs Rep1	Abs Rep2	Abs Rep3
A	1.8335	1.8522	1.1835	0.8487	0.0131	0.0125	0.0129	1.1316	1.701	1.0635	0.639	0.0125		ARP2/3	ERK3 40nM	GST	1.5225	1.1699	1.1508
B	1.5225	1.3219	0.6924	0.466	0.0129	0.0124	0.0188	0.0135	0.012	0.028	0.0151	0.0132			ERK3 20nM	GST	1.3219	0.987	1.0862
C	0.0036	0.0061	0.0045	0.0034	0.0037	0.0029	0.0115	0.0125	0.0134	0.0137	0.013	0.0123			ERK3 10nM	GST	0.6924	0.5706	0.5942
D	1.3221	1.1906	0.8109	0.5905	0.0102	0.0104	0.0095	0.8578	1.2424	0.7937	0.5005	0.0072			ERK3 5nM	GST	0.466	0.3946	0.3768
E	1.1699	0.987	0.5706	0.3946	0.0069	0.0116	0.0133	0.0088	0.0087	0.023	0.011	0.0115		ARP2/3	GST 40nM	GST	0.0129	0.0069	0.0112
F	1.2752	1.1224	0.752	0.5242	0.0066	0.0059	0.0054	0.6578	0.9336	0.5688	0.319	0.0075			GST 20nM	GST	0.0124	0.0116	0.0126
G	1.1508	1.0862	0.5942	0.3768	0.0112	0.0126	0.0056	0.0538	0.0156	0.0108	0.0052	0.0106			GST 10nM	GST	0.0188	0.0133	0.0056
H															GST 5nM	GST	0.0135	0.0088	0.0538
End Time				2021-02-03 15:58:19
