# Supplementary material for: ERK3/MAPK6 dictates CDC42/RAC1 activity and ARP2/3-dependent actin polymerization
Source: eLife journal article supplement (doi:10.7554/elife.85167), 2023-04-14
Supplement: fig6-data5 [file Figure 6M-source data.xlsx]

## Sheet: Sheet1
Run 03/05/22
Rep1	F	G	F/G
shC	27280359	16891773	1.61501
sh3	633506	35318903	0.0179367
Rep2
shC	29937706	31398037	0.95349
sh3	1801648	50233279	0.0358656
Rep3	25162806	35282288	0.713185
	14511401	40015401	0.362645
