# Supplementary material for: ERK3/MAPK6 dictates CDC42/RAC1 activity and ARP2/3-dependent actin polymerization
Source: eLife journal article supplement (doi:10.7554/elife.85167), 2023-04-14
Supplement: fig6-figsupp1-data1 [file Figure 6-figure supplement 1A.xlsx]

## Sheet: Crelux
Method name: ELISA 450nm vs 570nm (Modified)
Application: SparkControl				V3.1
Device: Spark				Serial number: 2007011179
Firmware:				LUM:V5.2.4|ABS:V4.3.2|ABS_MEX:V5.1.1|MTP:V14.2.11|FLUOR:V5.1.4|FLUOR_BOTTOM:V5.0.2|PODI:V1.11.2
Date:				2021-06-09
Time:				4:23 PM
System				CBUMAINZ-HP
User				CBUMainz-HP\User
Plate				[GRE96ft] - Greiner 96 Flat Transparent Cat. No.: 655101/655161/655192
Lid lifter				No lid
Humidity Cassette				No humidity cassette
Smooth mode				Not selected
List of actions in this measurement script:
Plate
	Absorbance					Label 1
Name				GRE96ft
Plate layout
Plate area				A1-D12
Mode	Absorbance
Name	Label 1
Measurement wavelength [nm]				450
Reference wavelength [nm]				570
Number of flashes				10
Settle time [ms]				50
Part of Plate				A1-D12
Start Time				2021-06-09 16:23:28
Temperature [°C]				26.4
Difference
<>	1	2	3	4	5	6	7	8	9	10	11	12
A	0.2378	0.1549	0.0638	0.0659	0.317	0.2057	0.0822	0.0639	0.3464	0.3878	0.1879	0.086
B	0.3056	0.173	0.1348	0.1183	0.2225	0.1127	0.0477	0.0536	0.0098	0.0106	0.1043	0.0207
C	0.4066	0.3622	0.3307	0.3128	0.2887	0.2883	0.2821	0.2739	0.01	0.0104	0.0099	0.0098
D	0.6113	0.5958	0.5788	0.582	0.5471	0.5901	0.6575	0.6336	0.6	0.0109	0.0112	0.0104
E
F
G
H
End Time				2021-06-09 16:23:54

## Sheet: Full lenght
Method name: ELISA 450nm vs 570nm (Modified)
Application: SparkControl				V3.1
Device: Spark				Serial number: 2007011179
Firmware:				LUM:V5.2.4|ABS:V4.3.2|ABS_MEX:V5.1.1|MTP:V14.2.11|FLUOR:V5.1.4|FLUOR_BOTTOM:V5.0.2|PODI:V1.11.2
Date:				2021-06-08
Time:				4:49 PM
System				CBUMAINZ-HP
User				CBUMainz-HP\User
Plate				[GRE96ft] - Greiner 96 Flat Transparent Cat. No.: 655101/655161/655192
Lid lifter				No lid
Humidity Cassette				No humidity cassette
Smooth mode				Not selected
List of actions in this measurement script:
Plate
	Absorbance					Label 1
Name				GRE96ft
Plate layout
Plate area				A1-H12
Mode	Absorbance
Name	Label 1
Measurement wavelength [nm]				450
Reference wavelength [nm]				570
Number of flashes				10
Settle time [ms]				50
Part of Plate				A1-H12
Start Time				2021-06-08 16:48:52
Temperature [°C]				26.1
<>	1	2	3	4	5	6	7	8	9	10	11	12
A	0.1537	0.1091	0.0964	0.0877	0.0854	0.0632	0.0359	0.0291	0.0259	0.0231	0.0776	0.0289
B	0.146	0.1174	0.107	0.0992	0.0855	0.0454	0.0284	0.0326	0.0246	0.0234	0.0159	0.026
C	0.1457	0.1196	0.1047	0.1009	0.0847	0.0501	0.0292	0.0271	0.0224	0.0208	0.011	0.0147
D	0.057	0.0354	0.0246	0.0205	0.0265	0.0216	0.0225	0.0205	0.0108	0.0123	0.0459	0.0186
E	0.0588	0.0328	0.0236	0.0214	0.027	0.022	0.0212	0.021	0.011	0.011	0.0108	0.0109
F	0.0561	0.0342	0.0243	0.0239	0.0275	0.0244	0.0222	0.0211	0.0114	0.0111	0.0052	0.0026
G	0.9661	0.75	0.3755	0.1968	0.9464	0.5878	0.3479	0.186	0.0029	0.0029	0.0023	0.002
H	0.8898	0.651	0.438	0.1972	0.0028	0.0029	0.0032	0.0036	0.0033	0.0032	0.0031	0.0025
End Time				2021-06-08 16:49:38
