# Supplementary material for: ERK3/MAPK6 dictates CDC42/RAC1 activity and ARP2/3-dependent actin polymerization
Source: eLife journal article supplement (doi:10.7554/elife.85167), 2023-04-14

Figure 3-figure supplement 1

B

In vitro kinase assay  
Substrate- MK5

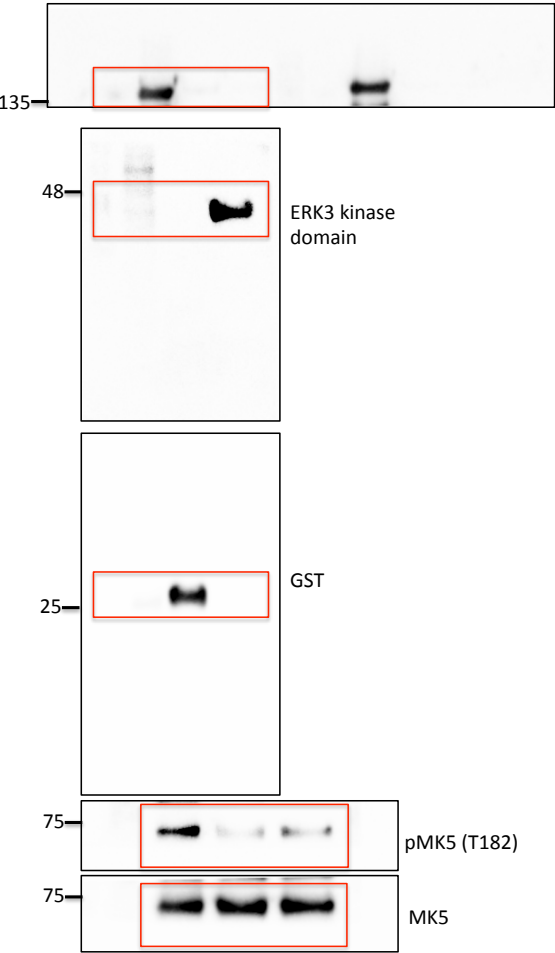

In vitro kinase assay  
Substrate- MBP

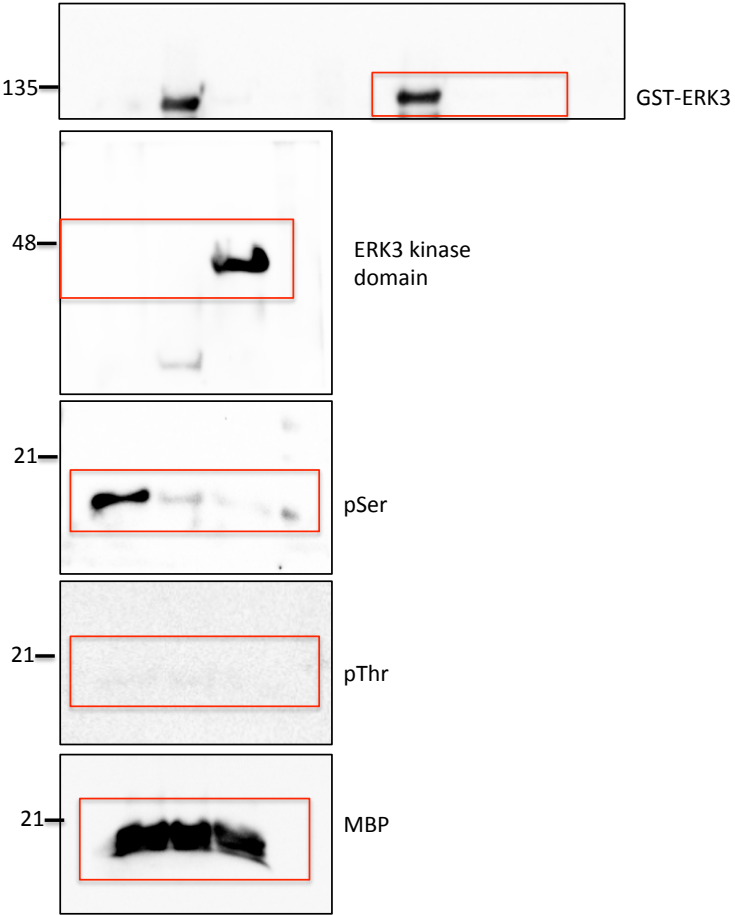

Supplement: fig6-figsupp1-data2 [file Figure 6-figure supplement 1B-source data.pdf › Figure 6-figure supplement 1-source data 2/Figure 6-figure supplement 1B-source data.pdf]
