# Supplementary material for: ERK3/MAPK6 dictates CDC42/RAC1 activity and ARP2/3-dependent actin polymerization
Source: eLife journal article supplement (doi:10.7554/elife.85167), 2023-04-14
Supplement: fig6-figsupp2-data2 [file Figure 6-figure supplement 2B-source data.xlsx]

## Sheet: Sheet1
Run 25/04/22
	Rac1 GTP	Rac1 TCL	Ratio	with shCo	Cdc42 GTP	Cdc42 TCL	Ratio	with shCo
shC	18147024	18147983	0.999947	1	16269731	17030175	0.955347	1
sh3	3537640	15566861	0.227255	0.227267	15266974	14695347	1.0389	1.08746
