# Supplementary material for: ERK3/MAPK6 dictates CDC42/RAC1 activity and ARP2/3-dependent actin polymerization
Source: eLife journal article supplement (doi:10.7554/elife.85167), 2023-04-14
Supplement: fig6-figsupp2-data3 [file Figure 6-figure supplement 2E and 2F-source data.xlsx]

## Sheet: Sheet1
Image	Pearson	Spearman	Manders	Kendall
1	0.4	0.436	0.652	0.306	EV	DMSO
2	0.7	0.781	0.961	0.589	EV	DMSO
3	0.68	0.741	0.872	0.5156	EV	DMSO
4	0.58	0.6487	0.714	0.4675	481D	DMSO
5	0.66	0.644	0.883	0.4648	481D	DMSO
6	0.65	0.649	0.903	0.4766	481D	DMSO
7	0.44	0.5145	0.714	0.3599	481D	DMSO
8	0.43	0.488	0.62	0.3389	481D	DMSO
9	0.34	0.346	0.565	0.2363	481D	CK666
10	0.65	0.711	0.878	0.5165	481D	CK666
11	0.74	0.788	0.947	0.5916	481D	CK666
12	0.41	0.479	0.678	0.3332	481D	CK666
13	0.59	0.669	0.819	0.4919	481D	CK666
14	0.43	0.524	0.693	0.3664	481D	CK666
15	0.45	0.471	0.688	0.331	481D	CK666
16	0.57	0.62	0.756	0.4516	481D	CK666
17	0.38	0.296	0.173	0.249	481D	CK666
18	0.86	0.775	0.984	0.5954	481D	CK666
19
20	0.7	0.7176	0.915	0.5286	418D	shC
21	0.44	0.486	0.68	0.338	418D	shC
22	0.47	0.559	0.729	0.3938	418D	shC
23	0.54	0.593	0.836	0.423	418D	shC
24	0.54	0.496	0.856	0.374	418D	shC
25	0.7	0.669	0.898	0.4857	418D	shC
26	0.65	0.685	0.85	0.5002	418D	shC
