# Supplementary material for: ERK3/MAPK6 dictates CDC42/RAC1 activity and ARP2/3-dependent actin polymerization
Source: eLife journal article supplement (doi:10.7554/elife.85167), 2023-04-14
Supplement: fig6-figsupp2-data4 [file Figure 6-figure supplement 2H-source data.xlsx]

## Sheet: Sheet1
Rep1
shCo		sh3	Average	Percentage of shCo
5204	4206.33	2427	2456.33	100
4049		2568		58.3961
3366		2374
Rep2
shCo		sh3		100	31.2708
1800	901	152	281.75
537		212
364		616
1115		147
Rep3
shCo		sh3
1022	1001	805	692	100	69.1309
1257		622
724		649
