# Supplementary material for: ERK3/MAPK6 dictates CDC42/RAC1 activity and ARP2/3-dependent actin polymerization
Source: eLife journal article supplement (doi:10.7554/elife.85167), 2023-04-14
Supplement: fig7-data2 [file Figure 7C-source data.xlsx]

## Sheet: Sheet1
Run 4/9/20
Rep1
	F	G	F/G
shC EV	5552790	14490347	0.383206
sh3 EV	2115355	13680740	0.154623
WT	12178347	14553761	0.836783
KD	19737569	11517660	1.71368
Run 19/08/20
Rep2
	F	G	F/G
shC EV	8459175	13943581	0.606672
sh3 EV	5480841	14641953	0.374324
WT	22895175	20682652	1.10697
KD	25299418	25963811	0.974411
Run 21/01/21
Rep3
	F	G	F/G
shC EV	21742095	16051447	1.35453
sh3 EV	3299104	8334125	0.395855
WT	9587347	10513175	0.911936
KD	9087790	9570974	0.949516
