# Supplementary material for: ERK3/MAPK6 dictates CDC42/RAC1 activity and ARP2/3-dependent actin polymerization
Source: eLife journal article supplement (doi:10.7554/elife.85167), 2023-04-14
Supplement: fig7-data3 [file Figure 7E-7I-source data.xlsx]

## Sheet: Sheet1
Run 27/04/22
	Cdc42-GTP	Cdc42 total	Ratio	Ratio with shC+EV	Ratio with sh3+EV		Rac1-GTP	Rac1 total	Ratio	Ratio with shC+EV	Ratio with sh3+EV
shC+EV	16234154	18308740	0.886689	3.77406	3.77406		15567811	17081104	0.911405	1	4.00765
sh3+EV	3869033	16467983	0.234943	1	1		2643447	11623811	0.227417	0.249523	1
sh3+WT	10654054	12824175	0.830779	3.53609	3.53609		7108397	9532790	0.745679	0.818163	3.27891
sh3+KD	12195832	8568740	1.42329	6.05804	6.05804		6905640	15594589	0.442823	0.485868	1.94719
