# Supplementary material for: ERK3/MAPK6 dictates CDC42/RAC1 activity and ARP2/3-dependent actin polymerization
Source: eLife journal article supplement (doi:10.7554/elife.85167), 2023-04-14
Supplement: fig7-figsupp1-data1 [file Figure 7-figure supplement 1B-source data.xlsx]

## Sheet: Result sheet
Method name: Actin polymerization (Modified)
Application: SparkControl				V3.1
Device: Spark				Serial number: 2007011179
Firmware:				LUM:V5.2.4|ABS:V4.3.2|ABS_MEX:V5.1.1|MTP:V14.2.11|FLUOR:V5.1.4|FLUOR_BOTTOM:V5.0.2|PODI:V1.11.2
Date:				2021-03-22
Time:				5:06 PM
System				CBUMAINZ-HP
User				CBUMainz-HP\User
Plate				[GRE96fb_chimney] - Greiner 96 Flat Black Cat. No.: 655079/655086/655077/655076
Lid lifter				No lid
Humidity Cassette				No humidity cassette
Smooth mode				Not selected
List of actions in this measurement script:
Plate
	Shaking
	Kinetic
		Fluorescence Top Reading				Actin
Name				GRE96fb_chimney
Plate layout
Plate area				A1-F2;G1-H1
Start Time				2021-03-22 14:45:49
Shaking (Orbital) Duration [s]				5
Shaking (Orbital) Position				Current
Shaking (Orbital) Amplitude [mm]				1
Shaking (Orbital) Frequency [rpm]				510
End Time				2021-03-22 14:45:54
Mode	Kinetic
Kinetic cycles				240
Interval time [hhmmss]				00:00:30
Mode	Fluorescence Top Reading
Name	Actin
Excitation				Filter
Excitation wavelength [nm]				360
Excitation bandwidth [nm]				35
Emission				Filter
Emission wavelength [nm]				415
Emission bandwidth [nm]				20
Gain Manual				47
Mirror				Automatic (50% Mirror)
Number of flashes				30
Integration time [µs]				40
Lag time [µs]				0
Settle time [ms]				0
Z-Position [μm]				17500
Z-Position mode				Manual
Multiple Reads per Well (Circle (filled))				2 x 2
Multiple Reads per Well (Border) [μm]				500
Part of Plate				A1-F2;G1-H1
Start Time				2021-03-22 14:45:59
Actin
1;1	1;2
2;1	2;2
Cycles / Well
A1	1	2	3	4	5	6	7	8	9	10	11	12	13	14	15	16	17	18	19	20	21	22	23	24	25	26	27	28	29	30	31	32	33	34	35	36	37	38	39	40	41	42	43	44	45	46	47	48	49
Time [s]	0	37.508	74.706	111.859	148.91	186.053	223.184	260.256	297.348	334.402	371.623	408.817	445.874	482.969	520.07	557.08	594.151	631.205	668.286	705.283	742.298	779.356	816.348	853.329	890.475	927.526	964.704	1001.74	1038.8	1075.83	1113.02	1150.12	1187.15	1224.41	1261.63	1298.71	1335.77	1372.96	1410.03	1447.09	1484.19	1521.2	1558.19	1595.27	1632.49	1669.57	1706.74	1743.87	1780.99
Temp. [°C]	22.7	22.8	22.8	22.8	22.8	22.8	22.8	22.9	22.9	22.9	22.9	23	23	23.1	23.2	23.2	23.2	23.2	23.3	23.4	23.4	23.4	23.4	23.5	23.5	23.6	23.7	23.7	23.7	23.8	23.8	23.8	23.9	23.9	24	24	24	24.1	24.2	24.2	24.2	24.3	24.4	24.3	24.4	24.5	24.5	24.5	24.6
Mean	677	670.25	677	687	699.25	711	724	738	750	764.25	778.25	790.25	803.75	821	835.75	850.75	862	876.25	887.75	902.25	915.5	930.75	943.75	956	965.75	981.5	990.25	1005.25	1019	1033	1043.25	1055.75	1065.5	1080.75	1091	1105.25	1116.75	1125.5	1138.25	1147.75	1159.25	1173.25	1181.25	1190.75	1204	1215.5	1224	1236.25	1244.25
StDev	38.2394	76.2556	73.0958	70.4911	80.9506	119.019	151.311	155.825	136.19	85.9961	58.9145	26.4953	19.0679	22.1585	26.3439	31.9218	42.0674	56.0022	64.2981	82.1401	96.3514	112.926	125.301	131.561	133.725	133.34	135.326	136.331	134.723	140.43	135.62	136.522	137.253	139.151	136.546	141.735	143.17	146.235	146.963	151.307	156.558	165.423	176.819	189.646	208.695	222.238	228.486	182.743	147.07
1;1	694	681	680	682	682	683	683	686	687	690	689	690	694	692	691	691	696	694	697	696	700	696	700	700	704	702	704	705	705	703	709	708	708	706	717	716	712	714	716	720	718	716	722	724	730	725	730	736	731
1;2	722	713	707	708	712	711	715	715	714	715	720	721	718	719	724	722	726	726	725	727	725	727	731	730	729	732	734	736	735	738	739	738	735	740	746	743	742	745	745	751	750	749	752	755	756	756	760	757	760
2;1	679	664	665	666	670	671	671	673	674	679	678	678	680	680	685	686	685	685	686	687	689	688	692	691	692	694	696	694	700	699	702	699	702	704	706	705	707	708	710	711	712	715	718	720	721	720	727	728	727
2;2	766	833	826	822	846	924	990	1001	962	864	808	735	719	727	740	755	779	808	827	864	895	927	956	968	974	974	980	982	981	992	986	986	988	993	994	1003	1005	1013	1016	1028	1038	1056	1083	1111	1152	1177	1195	1105	1032
Cycles / Well
A2	1	2	3	4	5	6	7	8	9	10	11	12	13	14	15	16	17	18	19	20	21	22	23	24	25	26	27	28	29	30	31	32	33	34	35	36	37	38	39	40	41	42	43	44	45	46	47	48	49
Time [s]	0	37.508	74.706	111.859	148.91	186.053	223.184	260.256	297.348	334.402	371.623	408.817	445.874	482.969	520.07	557.08	594.151	631.205	668.286	705.283	742.298	779.356	816.348	853.329	890.475	927.526	964.704	1001.74	1038.8	1075.83	1113.02	1150.12	1187.15	1224.41	1261.63	1298.71	1335.77	1372.96	1410.03	1447.09	1484.19	1521.2	1558.19	1595.27	1632.49	1669.57	1706.74	1743.87	1780.99
Temp. [°C]	22.7	22.8	22.8	22.9	22.8	22.8	22.8	22.9	22.9	23	23	23	23	23.1	23.2	23.2	23.2	23.2	23.3	23.4	23.4	23.4	23.4	23.5	23.5	23.6	23.7	23.7	23.7	23.8	23.8	23.8	23.9	23.9	24	24	24	24.1	24.2	24.2	24.3	24.3	24.4	24.4	24.4	24.5	24.5	24.6	24.6
Mean	1365.25	1403.75	1482.75	1577	1671.5	1758.75	1843.25	1939.25	2052.75	2181	2293	2408.75	2512.5	2594.25	2690	2765.75	2849	2924.25	3013.5	3052	3120.25	3184.75	3253.75	3315.75	3384.5	3439.25	3511.75	3566.5	3622.25	3666.75	3737.25	3788.5	3825	3876.25	3921	3951.75	4005	4053	4081	4134.25	4158	4186	4227	4259.75	4278	4324.25	4347	4391.75	4451.25
StDev	17.7834	44.395	51.1363	64.2566	69.8212	79.3431	88.5983	91.6242	88.4119	107.961	108.801	116.837	109.986	118.488	129.567	136.627	127.49	139.438	124.648	141.747	145.632	139.127	148.33	154.696	166.93	159.64	172.626	171.259	178.236	184.837	186.909	196.451	198.153	198.073	194.767	205.533	193.836	205.028	208.118	194.94	212.041	213.193	199.507	222.687	207.354	211.643	229.833	218.206	179.959
1;1	2083	2052	2118	2187	2289	2374	2485	2600	2684	2785	2889	2976	3082	3173	3253	3346	3452	3529	3602	3675	3750	3833	3896	3956	3988	4081	4133	4203	4251	4302	4346	4393	4429	4492	4531	4597	4616	4678	4715	4785	4777	4792	4883	4890	4948	4986	5000	5046	5260
1;2	2101	2144	2208	2309	2409	2515	2626	2748	2851	2970	3088	3204	3270	3368	3478	3591	3667	3765	3822	3932	3996	4069	4147	4215	4297	4357	4446	4489	4555	4609	4677	4712	4760	4828	4861	4933	4947	5002	5053	5098	5144	5165	5212	5248	5303	5299	5383	5419	5538
2;1	2125	2077	2134	2215	2304	2405	2492	2601	2710	2797	2921	3017	3146	3208	3299	3382	3476	3568	3666	3725	3811	3895	3945	4027	4083	4149	4212	4272	4317	4363	4427	4481	4533	4596	4624	4653	4706	4749	4791	4846	4880	4901	4959	4984	5036	5063	5113	5147	5338
2;2	2094	2134	2219	2312	2424	2534	2655	2769	2847	2985	3096	3189	3321	3415	3515	3607	3699	3808	3864	3953	4055	4126	4198	4285	4334	4412	4484	4562	4617	4682	4729	4815	4858	4918	4945	5015	5025	5111	5152	5190	5224	5242	5301	5367	5380	5445	5494	5506	5652
Cycles / Well
B1	1	2	3	4	5	6	7	8	9	10	11	12	13	14	15	16	17	18	19	20	21	22	23	24	25	26	27	28	29	30	31	32	33	34	35	36	37	38	39	40	41	42	43	44	45	46	47	48	49
Time [s]	0	37.508	74.706	111.859	148.91	186.053	223.184	260.256	297.348	334.402	371.623	408.817	445.874	482.969	520.07	557.08	594.151	631.205	668.286	705.283	742.298	779.356	816.348	853.329	890.475	927.526	964.704	1001.74	1038.8	1075.83	1113.02	1150.12	1187.15	1224.41	1261.63	1298.71	1335.77	1372.96	1410.03	1447.09	1484.19	1521.2	1558.19	1595.27	1632.49	1669.57	1706.74	1743.87	1780.99
Temp. [°C]	22.8	22.8	22.9	22.9	22.8	22.8	22.8	22.9	22.9	23	23	23	23.1	23.1	23.2	23.1	23.2	23.2	23.3	23.4	23.4	23.4	23.4	23.5	23.5	23.6	23.7	23.7	23.7	23.8	23.8	23.8	23.9	23.9	24	24.1	24	24.2	24.2	24.2	24.3	24.4	24.4	24.4	24.4	24.5	24.6	24.6	24.6
Mean	6154.25	6505.25	6920.5	7324.75	7775.5	8216.25	8623.25	9066.25	9511.25	9954	10349.2	10791.2	11147.8	11530.8	11819.2	12151.2	12413.5	12711.8	13003.5	13222	13452	13695.5	13905.2	14144.2	14329.2	14555	14734.2	14898.8	15089.5	15197.5	15361.2	15552	15689	15782.8	15981	16074.8	16161.5	16261.5	16318.2	16457	16554	16655.2	16699	16736	16846	16943	17031.8	17096.8	17187.2
StDev	29.5579	60.407	67.9626	72.8492	78.7401	91.7642	87.3575	98.37	98.7421	103.315	110.925	113.717	114.41	129.188	129.231	132.084	129.018	132.238	151.125	136.315	144.703	145.576	153.537	148.043	157.483	148.197	166.782	154.944	176.994	164.184	178.853	180.215	165.272	189.668	182.303	177.211	180.823	190.244	188.772	192.964	199.542	206.967	197.162	200.566	199.61	207.264	217.576	202.156	203.87
1;1	2042	2080	2143	2246	2337	2445	2547	2627	2728	2841	2931	3023	3131	3195	3283	3367	3464	3546	3621	3681	3756	3830	3889	3968	4028	4088	4163	4221	4259	4308	4377	4421	4477	4502	4549	4596	4639	4696	4721	4803	4789	4826	4874	4932	4940	4990	5015	5071	5094
1;2	2107	2190	2266	2361	2471	2584	2684	2786	2899	3002	3108	3206	3302	3395	3499	3576	3664	3740	3853	3917	3972	4040	4133	4198	4270	4313	4406	4452	4517	4562	4644	4675	4724	4766	4823	4844	4915	4953	4978	5059	5077	5128	5173	5207	5251	5293	5310	5335	5371
2;1	2073	2070	2144	2222	2325	2410	2519	2619	2725	2817	2911	3010	3103	3180	3294	3364	3455	3533	3614	3674	3741	3810	3894	3953	4020	4088	4132	4205	4244	4310	4359	4417	4456	4503	4565	4592	4645	4680	4718	4744	4799	4811	4881	4903	4954	4996	5022	5036	5092
2;2	2100	2166	2256	2357	2463	2585	2682	2800	2896	3012	3117	3220	3325	3425	3524	3610	3699	3791	3901	3910	4021	4097	4178	4233	4319	4370	4460	4505	4590	4619	4705	4772	4776	4877	4910	4942	4987	5063	5094	5141	5185	5215	5255	5307	5326	5396	5453	5451	5498
Cycles / Well
B2	1	2	3	4	5	6	7	8	9	10	11	12	13	14	15	16	17	18	19	20	21	22	23	24	25	26	27	28	29	30	31	32	33	34	35	36	37	38	39	40	41	42	43	44	45	46	47	48	49
Time [s]	0	37.508	74.706	111.859	148.91	186.053	223.184	260.256	297.348	334.402	371.623	408.817	445.874	482.969	520.07	557.08	594.151	631.205	668.286	705.283	742.298	779.356	816.348	853.329	890.475	927.526	964.704	1001.74	1038.8	1075.83	1113.02	1150.12	1187.15	1224.41	1261.63	1298.71	1335.77	1372.96	1410.03	1447.09	1484.19	1521.2	1558.19	1595.27	1632.49	1669.57	1706.74	1743.87	1780.99
Temp. [°C]	22.8	22.8	22.8	22.9	22.8	22.8	22.8	22.9	22.9	23	23	23	23	23.1	23.2	23.1	23.2	23.2	23.3	23.4	23.4	23.4	23.4	23.5	23.5	23.6	23.7	23.7	23.7	23.8	23.8	23.8	23.9	23.9	24	24	24	24.2	24.2	24.2	24.3	24.4	24.4	24.4	24.4	24.5	24.5	24.6	24.6
Mean	5822.75	6046.75	6399	6740	7159.75	7549.25	7937	8355.5	8785.25	9194.25	9574.75	9958.5	10310	10649.8	10988.2	11290.2	11605.5	11873.2	12125	12435	12636.5	12904.8	13091	13290.5	13492.5	13705	13864.2	14058	14183.2	14366.5	14492.5	14611.2	14775.5	14895.8	15005.8	15110.2	15239.2	15353.5	15443.8	15471.5	15630	15719.2	15769	15838.2	15954.5	16004.2	16053.8	16140	16177.5
StDev	66.7882	133.907	133.458	158.243	179.428	166.46	184.8	178.83	207.363	213.093	211.628	231.065	239.077	235.033	242.136	267.214	252.653	292.583	293.211	270.799	313.536	300.237	346.018	319.539	328.091	314.858	306.81	339.514	366.212	356.587	371.803	358.601	356.927	361.541	370.938	399.571	394.839	407.11	392.22	403.86	413.314	418.961	419.216	408.29	406.703	435.447	425.983	417.017	453.18
1;1	4300	4353	4535	4753	4948	5228	5447	5724	5937	6166	6425	6612	6854	7070	7294	7480	7693	7846	8039	8193	8339	8485	8602	8787	8931	9071	9224	9287	9387	9459	9594	9696	9776	9892	9996	10045	10129	10197	10303	10419	10399	10455	10558	10610	10712	10755	10795	10863	10886
1;2	4449	4596	4762	5003	5231	5496	5751	6015	6260	6513	6769	7007	7209	7439	7646	7879	8101	8260	8467	8596	8778	8980	9142	9278	9455	9542	9641	9825	9943	10060	10118	10249	10335	10439	10587	10670	10687	10838	10902	10968	11050	11085	11210	11226	11306	11426	11401	11537	11523
2;1	4394	4333	4505	4685	4931	5183	5443	5685	5901	6164	6386	6631	6828	7054	7273	7478	7652	7817	8013	8184	8319	8520	8663	8817	8935	9099	9213	9344	9444	9550	9631	9752	9864	9946	10020	10110	10168	10268	10382	10372	10449	10563	10634	10651	10751	10835	10926	11000	10956
2;2	4433	4548	4737	4973	5267	5488	5778	6011	6293	6553	6773	7035	7292	7495	7747	7991	8117	8397	8586	8706	8941	9058	9298	9415	9541	9696	9826	9963	10127	10168	10351	10416	10510	10622	10703	10844	10932	11012	11106	11186	11210	11333	11404	11421	11529	11638	11715	11731	11826
Cycles / Well
C1	1	2	3	4	5	6	7	8	9	10	11	12	13	14	15	16	17	18	19	20	21	22	23	24	25	26	27	28	29	30	31	32	33	34	35	36	37	38	39	40	41	42	43	44	45	46	47	48	49
Time [s]	0	37.508	74.706	111.859	148.91	186.053	223.184	260.256	297.348	334.402	371.623	408.817	445.874	482.969	520.07	557.08	594.151	631.205	668.286	705.283	742.298	779.356	816.348	853.329	890.475	927.526	964.704	1001.74	1038.8	1075.83	1113.02	1150.12	1187.15	1224.41	1261.63	1298.71	1335.77	1372.96	1410.03	1447.09	1484.19	1521.2	1558.19	1595.27	1632.49	1669.57	1706.74	1743.87	1780.99
Temp. [°C]	22.8	22.8	22.9	22.8	22.8	22.8	22.8	22.9	22.9	23	23	23	23.1	23.1	23.2	23.1	23.2	23.2	23.3	23.4	23.4	23.4	23.5	23.5	23.5	23.6	23.7	23.7	23.7	23.8	23.8	23.8	23.9	24	24	24.1	24.1	24.2	24.2	24.2	24.3	24.4	24.4	24.4	24.4	24.5	24.6	24.6	24.6
Mean	2726	2743	2804.75	2865	2931	3025.5	3096	3174.75	3267	3357.25	3437.25	3528.25	3615.5	3708.25	3807.25	3901.75	3986.75	4067.5	4149.25	4219.5	4284.25	4388.25	4452	4533.5	4606.5	4668.75	4752	4822	4890	4948.75	5019.5	5064.25	5141.25	5219.75	5252.25	5293	5400.75	5411.75	5505	5564.25	5586.75	5650.75	5702.5	5739.5	5789	5810.25	5861.75	5891	5971.25
StDev	78.2347	85.9898	94.9579	100.805	107.209	103.229	117.684	124.401	119.662	134.299	137.899	140.773	149.253	151.269	153.589	163.187	163.981	168.193	166.215	185.898	177.224	173.183	190.596	188.776	201.653	198.876	195.423	212.861	205.165	200.567	208.749	208.453	217.529	221.708	219.217	212.928	221.378	220.16	217.912	232.255	218.314	230.135	230.77	236.804	233.559	239.595	230.272	217.235	252.881
1;1	2147	2198	2291	2392	2493	2599	2711	2803	2909	3012	3096	3198	3278	3396	3506	3572	3696	3764	3838	3911	3997	4081	4109	4217	4264	4352	4423	4450	4543	4613	4646	4682	4739	4786	4855	4889	4924	4973	5052	5058	5128	5143	5155	5208	5247	5314	5366	5417	5425
1;2	2303	2348	2435	2543	2657	2752	2883	2988	3081	3210	3310	3416	3525	3616	3730	3821	3919	3997	4092	4187	4252	4336	4412	4481	4570	4646	4689	4763	4826	4880	4954	4995	5054	5116	5167	5193	5248	5309	5376	5412	5459	5488	5533	5564	5621	5683	5706	5722	5800
2;1	2158	2180	2245	2334	2428	2545	2642	2745	2854	2947	3063	3146	3255	3339	3448	3518	3610	3687	3787	3860	3928	4021	4075	4144	4198	4282	4330	4397	4466	4517	4588	4650	4700	4747	4796	4848	4905	4949	4993	5025	5085	5112	5166	5207	5238	5296	5316	5355	5369
2;2	2268	2325	2423	2521	2620	2741	2865	2983	3089	3205	3324	3410	3524	3636	3749	3829	3941	4025	4104	4222	4278	4359	4430	4523	4584	4669	4726	4814	4881	4928	4996	5053	5129	5178	5233	5271	5337	5370	5417	5470	5505	5557	5584	5660	5670	5751	5766	5791	5862
Cycles / Well
C2	1	2	3	4	5	6	7	8	9	10	11	12	13	14	15	16	17	18	19	20	21	22	23	24	25	26	27	28	29	30	31	32	33	34	35	36	37	38	39	40	41	42	43	44	45	46	47	48	49
Time [s]	0	37.508	74.706	111.859	148.91	186.053	223.184	260.256	297.348	334.402	371.623	408.817	445.874	482.969	520.07	557.08	594.151	631.205	668.286	705.283	742.298	779.356	816.348	853.329	890.475	927.526	964.704	1001.74	1038.8	1075.83	1113.02	1150.12	1187.15	1224.41	1261.63	1298.71	1335.77	1372.96	1410.03	1447.09	1484.19	1521.2	1558.19	1595.27	1632.49	1669.57	1706.74	1743.87	1780.99
Temp. [°C]	22.8	22.8	22.9	22.8	22.8	22.8	22.8	22.9	22.9	22.9	23	23	23.1	23.1	23.2	23.2	23.2	23.2	23.3	23.4	23.4	23.4	23.5	23.5	23.5	23.6	23.7	23.7	23.7	23.8	23.8	23.8	23.9	24	24	24.1	24.1	24.2	24.2	24.2	24.3	24.4	24.4	24.4	24.5	24.5	24.6	24.6	24.6
Mean	1503.75	1540	1629	1728	1822	1912	2010.5	2111	2224	2356.5	2474.5	2586.5	2692.75	2792.25	2898.25	2971.5	3070	3140	3221.5	3301.5	3361.5	3439.75	3486.75	3569	3629.25	3711.75	3763.5	3826.75	3898.75	3951.5	4012	4062.25	4122.25	4171	4222	4258.5	4312	4355.25	4412.75	4438.75	4489.75	4516	4540.75	4582.25	4604.25	4666.5	4685.5	4739.75	4801.5
StDev	246.414	247.508	263.508	279.864	295	299.392	309.275	337.451	342.235	356.181	370.587	382.614	387.647	412.07	397.405	425.745	425.781	428.182	444.908	470.895	471.268	510.214	474.538	493.783	486.897	458.968	474.941	525.789	524.46	549.832	551.184	538.409	533.835	537.409	537.902	571.026	550.341	566.754	648.994	617.947	585.245	618.793	522.995	584.747	582.49	633.93	598.765	651.121	600.029
1;1	6009	6127	6379	6716	7030	7370	7697	7984	8347	8688	8951	9247	9547	9847	10167	10423	10635	10866	11142	11409	11565	11809	11930	12244	12387	12602	12764	12813	12994	13171	13243	13463	13615	13617	13752	13778	13939	14025	14065	14151	14260	14275	14453	14562	14637	14697	14792	14855	14867
1;2	6201	6356	6635	6982	7338	7678	8059	8401	8780	9092	9452	9792	10069	10386	10641	10981	11261	11456	11756	12048	12236	12463	12623	12862	13027	13169	13377	13533	13751	13881	14007	14093	14299	14388	14463	14570	14676	14834	14964	15009	15063	15179	15217	15316	15444	15545	15624	15710	15652
2;1	5613	5782	6036	6342	6653	6984	7342	7653	7997	8315	8649	8933	9243	9485	9808	10038	10379	10558	10827	11046	11248	11404	11663	11802	12010	12208	12382	12498	12668	12745	12892	13043	13182	13322	13391	13512	13611	13759	13691	13888	13977	14054	14168	14249	14321	14394	14478	14432	14583
2;2	5997	6238	6542	6874	7192	7534	7899	8297	8616	9022	9350	9610	9988	10268	10613	10835	11178	11382	11685	11949	12141	12421	12568	12771	12968	13129	13321	13544	13664	13841	13971	14177	14241	14365	14472	14658	14722	14876	14977	15131	15157	15267	15169	15461	15481	15690	15671	15751	15823
Cycles / Well
D1	1	2	3	4	5	6	7	8	9	10	11	12	13	14	15	16	17	18	19	20	21	22	23	24	25	26	27	28	29	30	31	32	33	34	35	36	37	38	39	40	41	42	43	44	45	46	47	48	49
Time [s]	0	37.508	74.706	111.859	148.91	186.053	223.184	260.256	297.348	334.402	371.623	408.817	445.874	482.969	520.07	557.08	594.151	631.205	668.286	705.283	742.298	779.356	816.348	853.329	890.475	927.526	964.704	1001.74	1038.8	1075.83	1113.02	1150.12	1187.15	1224.41	1261.63	1298.71	1335.77	1372.96	1410.03	1447.09	1484.19	1521.2	1558.19	1595.27	1632.49	1669.57	1706.74	1743.87	1780.99
Temp. [°C]	22.8	22.8	22.8	22.8	22.8	22.8	22.8	22.9	22.9	23	23	23	23.1	23.1	23.2	23.2	23.2	23.2	23.3	23.4	23.4	23.4	23.5	23.5	23.5	23.6	23.7	23.7	23.7	23.8	23.8	23.8	23.9	23.9	24	24	24.1	24.1	24.2	24.3	24.4	24.4	24.4	24.4	24.4	24.5	24.6	24.6	24.6
Mean	1385.5	1379	1450.25	1536.25	1629	1709.75	1799.75	1910.75	2013.75	2147.25	2274.75	2390.5	2502	2586.5	2676.25	2768	2852	2939.25	3004.75	3077.75	3150.75	3221.25	3276.75	3348.5	3400.75	3474.25	3540.25	3602.25	3654.75	3706	3760.75	3817.5	3861.75	3922.75	3949.5	4007.75	4032	4090	4131	4177.25	4201.75	4216	4270	4294.75	4327	4353.75	4394.5	4448	4634.5
StDev	107.255	111.896	109.041	151.333	144.221	168.632	172.197	176.288	191.914	208.669	217.367	207.022	233.968	242.682	224.986	248.765	247.404	240.853	256.427	256.449	258.466	287.601	276.765	284.429	285.265	294.97	300.553	299.5	310.574	302.736	320.452	304.239	307.67	318.499	327.755	351.671	367.715	324.963	378.972	343.22	380.534	372.614	370.528	355.988	413.96	396.039	406.883	390.672	378.827
1;1	4373	4507	4709	4924	5177	5407	5664	5955	6142	6398	6617	6839	7100	7290	7488	7635	7879	8068	8216	8423	8579	8699	8852	9014	9125	9259	9401	9506	9570	9746	9825	9901	10040	10141	10173	10255	10378	10432	10485	10628	10608	10661	10775	10845	10869	10928	11067	11077	11114
1;2	4592	4746	4948	5249	5475	5758	6026	6287	6518	6798	7030	7248	7512	7706	7898	8104	8337	8501	8697	8840	9010	9203	9334	9482	9623	9770	9917	9998	10124	10230	10346	10403	10557	10668	10756	10855	10979	10990	11133	11158	11298	11311	11418	11478	11596	11663	11764	11763	11785
2;1	4476	4576	4735	4948	5169	5394	5658	5885	6086	6328	6533	6785	6961	7134	7378	7539	7766	7939	8108	8225	8400	8535	8694	8810	8964	9080	9214	9302	9423	9523	9604	9700	9841	9933	10014	10050	10127	10252	10269	10369	10461	10489	10573	10694	10667	10801	10833	10879	10953
2;2	4362	4511	4756	4976	5228	5525	5770	6006	6261	6456	6743	6980	7192	7426	7635	7821	8026	8200	8369	8512	8734	8900	9060	9186	9341	9448	9599	9734	9852	9968	10079	10145	10266	10399	10465	10554	10667	10724	10817	10918	11005	11053	11095	11219	11265	11354	11413	11431	11518
Cycles / Well
D2	1	2	3	4	5	6	7	8	9	10	11	12	13	14	15	16	17	18	19	20	21	22	23	24	25	26	27	28	29	30	31	32	33	34	35	36	37	38	39	40	41	42	43	44	45	46	47	48	49
Time [s]	0	37.508	74.706	111.859	148.91	186.053	223.184	260.256	297.348	334.402	371.623	408.817	445.874	482.969	520.07	557.08	594.151	631.205	668.286	705.283	742.298	779.356	816.348	853.329	890.475	927.526	964.704	1001.74	1038.8	1075.83	1113.02	1150.12	1187.15	1224.41	1261.63	1298.71	1335.77	1372.96	1410.03	1447.09	1484.19	1521.2	1558.19	1595.27	1632.49	1669.57	1706.74	1743.87	1780.99
Temp. [°C]	22.8	22.8	22.8	22.8	22.8	22.8	22.8	22.9	22.9	23	23	23	23.1	23.1	23.2	23.2	23.2	23.2	23.3	23.4	23.4	23.4	23.5	23.5	23.5	23.6	23.7	23.7	23.7	23.8	23.8	23.8	23.9	24	24	24	24	24.2	24.2	24.3	24.3	24.4	24.4	24.4	24.5	24.5	24.6	24.6	24.6
Mean	5864	6078.25	6429.5	6784.75	7148	7543.5	7904.5	8270	8626.75	9035.25	9379.25	9726.25	10109.2	10407.8	10708.5	10975	11285.8	11529	11812.2	11997.2	12231	12444.5	12667.2	12866.5	13067.8	13196	13408.5	13606.8	13762.2	13915.2	14054.5	14227.2	14367.2	14538	14600	14703	14820	14946.5	15037.5	15120.8	15233	15332.2	15387.5	15506.8	15531.8	15631.5	15714.2	15766	15859.5
StDev	84.5749	107.488	121.109	129.454	124.314	136.983	139.169	159.329	158.073	170.811	174.096	187.158	178.666	187.308	204.344	216.642	205.897	207.881	214.683	216.158	239.914	238.162	242.642	241.156	237.219	259.641	248.457	261.606	267.124	277.526	271.273	280.769	271.387	276.042	282.751	289.002	284.269	272.912	286.992	280.547	308.747	313.625	286.592	298.959	310.487	298.558	322.852	328.474	314.625
1;1	2533	2580	2680	2806	2917	3052	3184	3311	3428	3555	3698	3814	3954	4063	4163	4281	4385	4494	4582	4683	4760	4870	4940	5039	5100	5162	5257	5297	5396	5423	5493	5567	5595	5690	5752	5730	5738	5873	5961	5936	6020	5928	6111	6136	6192	6115	6263	6288	6304
1;2	2651	2739	2835	2966	3068	3223	3356	3500	3643	3786	3904	4060	4168	4282	4411	4542	4635	4754	4847	4965	5052	5151	5227	5314	5385	5503	5567	5625	5719	5802	5851	5940	5982	6072	6113	6135	6284	6244	6343	6374	6394	6529	6559	6539	6552	6670	6777	6773	6691
2;1	2452	2489	2560	2666	2786	2909	3046	3141	3287	3408	3530	3639	3771	3866	3960	4072	4186	4296	4386	4490	4552	4631	4724	4796	4873	4943	5031	5085	5159	5223	5288	5355	5415	5485	5539	5553	5740	5678	5742	5808	5781	5930	5952	5938	5930	6144	6058	6084	6083
2;2	2589	2662	2781	2896	3017	3157	3310	3442	3572	3724	3877	3982	4114	4228	4354	4498	4588	4694	4809	4899	5037	5099	5220	5281	5342	5442	5517	5612	5698	5761	5823	5906	5930	6010	6110	6117	6164	6210	6303	6322	6421	6400	6461	6532	6579	6620	6592	6694	6738
Cycles / Well
E1	1	2	3	4	5	6	7	8	9	10	11	12	13	14	15	16	17	18	19	20	21	22	23	24	25	26	27	28	29	30	31	32	33	34	35	36	37	38	39	40	41	42	43	44	45	46	47	48	49
Time [s]	0	37.508	74.706	111.859	148.91	186.053	223.184	260.256	297.348	334.402	371.623	408.817	445.874	482.969	520.07	557.08	594.151	631.205	668.286	705.283	742.298	779.356	816.348	853.329	890.475	927.526	964.704	1001.74	1038.8	1075.83	1113.02	1150.12	1187.15	1224.41	1261.63	1298.71	1335.77	1372.96	1410.03	1447.09	1484.19	1521.2	1558.19	1595.27	1632.49	1669.57	1706.74	1743.87	1780.99
Temp. [°C]	22.8	22.8	22.8	22.8	22.8	22.8	22.8	22.9	22.9	23	23	23	23.1	23.1	23.2	23.2	23.2	23.2	23.3	23.4	23.4	23.4	23.5	23.5	23.6	23.6	23.7	23.7	23.7	23.8	23.8	23.9	23.9	23.9	24	24	24.1	24.1	24.2	24.3	24.4	24.4	24.4	24.4	24.4	24.5	24.6	24.6	24.6
Mean	5239.75	5403	5678.5	6009	6325.75	6644.25	6984.5	7315	7675.75	8042.25	8376.75	8689.5	9009	9292	9597.25	9855.75	10141.8	10337.2	10618.8	10869.5	11045.2	11264.8	11426.2	11647.5	11823.2	12001.5	12182.5	12317.8	12489	12626.5	12744.2	12911.2	13051	13137.2	13228.8	13337.8	13445.5	13578.5	13627.5	13742.2	13809.8	13884.8	13933	14069.5	14131	14237	14288.2	14355.5	14418.8
StDev	355.433	407.5	435.335	463.7	458.163	512.668	514.666	542.442	588.582	622.363	618.255	641.48	679.945	732.529	696.129	744.539	720.804	771.546	743.219	816.2	820.038	799.462	847.786	842.886	885.424	914.904	890.862	852.007	916.216	801.948	901.957	935.971	847.587	891.785	824.618	837.301	915.958	863.4	883.524	897.319	928.486	935.586	902.959	893.557	871.254	882.149	896.678	987.116	1033.29
1;1	6642	6849	7173	7443	7889	8255	8630	9062	9388	9693	10066	10356	10737	11054	11342	11541	11931	12179	12445	12704	12853	13087	13286	13530	13697	13825	14054	14205	14444	14455	14614	14904	15114	15119	15273	15385	15428	15596	15602	15774	15869	15970	16082	16141	16124	16272	16435	16428	16454
1;2	7036	7327	7690	8106	8429	8939	9309	9689	10119	10542	10879	11231	11620	11992	12256	12626	12881	13170	13420	13717	13985	14175	14466	14670	14883	15005	15235	15446	15617	15657	15970	16159	16190	16428	16377	16525	16724	16804	16961	17002	17207	17297	17297	17382	17436	17520	17579	17711	17881
2;1	6194	6349	6626	6976	7307	7685	8050	8361	8678	9024	9366	9665	9966	10204	10560	10819	11123	11293	11619	11722	11992	12231	12411	12616	12744	12811	13079	13383	13392	13751	13794	13875	14115	14274	14375	14484	14509	14706	14831	14827	14950	15026	15101	15238	15351	15404	15426	15348	15401
2;2	6445	6679	7107	7492	7877	8284	8688	9043	9359	9830	10101	10477	10925	11199	11516	11768	12094	12387	12700	12820	13103	13323	13585	13739	14046	14245	14380	14510	14717	14930	14976	15102	15183	15474	15538	15585	15785	15860	15943	16090	16124	16272	16345	16576	16575	16708	16829	16903	16952
[truncated: 178 more columns]
