# Supplementary material for: ERK3/MAPK6 dictates CDC42/RAC1 activity and ARP2/3-dependent actin polymerization
Source: eLife. 2023 Apr 14;12:e85167. doi: 10.7554/eLife.85167 (PMC10191626; doi:10.7554/eLife.85167)
Supplement: Figure 5—figure supplement 2—source data 1. [file elife-85167-fig5-figsupp2-data1.zip]

Archive with 17 entries (10 files):
- Figure 5-figure supplement 2-source data 1/
- Figure 5-figure supplement 2-source data 1/.DS_Store
- __MACOSX/
- __MACOSX/Figure 5-figure supplement 2-source data 1/
- __MACOSX/Figure 5-figure supplement 2-source data 1/._.DS_Store
- Figure 5-figure supplement 2-source data 1/Figure 5-figure supplement 2A-source data.pdf
- __MACOSX/Figure 5-figure supplement 2-source data 1/._Figure 5-figure supplement 2A-source data.pdf
- Figure 5-figure supplement 2-source data 1/originals/
- Figure 5-figure supplement 2-source data 1/originals/Cdc42 Chemidoc Touch Images 2022-05-03_10.56.09/
- Figure 5-figure supplement 2-source data 1/originals/Cdc42 Chemidoc Touch Images 2022-05-03_10.56.09/.DS_Store
- __MACOSX/Figure 5-figure supplement 2-source data 1/originals/
- __MACOSX/Figure 5-figure supplement 2-source data 1/originals/Cdc42 Chemidoc Touch Images 2022-05-03_10.56.09/
- __MACOSX/Figure 5-figure supplement 2-source data 1/originals/Cdc42 Chemidoc Touch Images 2022-05-03_10.56.09/._.DS_Store
- Figure 5-figure supplement 2-source data 1/originals/Cdc42 Chemidoc Touch Images 2022-05-03_10.56.09/220503 Cdc42.scn
- __MACOSX/Figure 5-figure supplement 2-source data 1/originals/Cdc42 Chemidoc Touch Images 2022-05-03_10.56.09/._220503 Cdc42.scn
- Figure 5-figure supplement 2-source data 1/originals/Ponceau s.jpg
- __MACOSX/Figure 5-figure supplement 2-source data 1/originals/._Ponceau s.jpg
