# Supplementary material for: ERK3/MAPK6 dictates CDC42/RAC1 activity and ARP2/3-dependent actin polymerization
Source: eLife. 2023 Apr 14;12:e85167. doi: 10.7554/eLife.85167 (PMC10191626; doi:10.7554/eLife.85167)
Supplement: Supplementary file 1. — Phosphorylation of the ARP2/3 protein complex subunits by full-length ERK3 was detected by in vitro kinase assay and in-gel digestion of the respective ARP2/3 complex proteins followed by subsequent LC-MS analysis using a timsTOF Pro coupled to a nanoElute nanoflow liquid chromatography system. MS acquisition was performed in DDA-PASEF mode. [file elife-85167-supp1.xlsx]

## Sheet: Sheet1
ARP	ARP	_CJK_160715_Krishna_ARP_12 (F013873)	Actin-related protein 3 OS=Homo sapiens GN=ACTR3 PE=1 SV=3	ARP3_HUMAN	SwissProt_20160121.fasta	47,371.9	100.0%	1	1	1	0.0171%	2.15%	HNPVFGVMS	R	-	97.7%	22.5	25.2	20.8	0	1	0	0	2	1,083.4329	1,786.96		10,477.5	410	418	Empty	TRUE
ARP	ARP	_CJK_160715_Krishna_ARP_14 (F013876)	Actin-related protein 3 OS=Homo sapiens GN=ACTR3 PE=1 SV=3	ARP3_HUMAN	SwissProt_20160121.fasta	47,371.9	100.0%	1	2	2	0.0324%	2.15%	HNPVFGVMS	R	-	99.7%	40.8	26.2	37.3	0	2	0	0	2	1,067.4380	1,961.27		377456	410	418	Empty	TRUE
ARP	ARP	_CJK_160715_Krishna_ARP_15 (F013877)	Actin-related protein 3 OS=Homo sapiens GN=ACTR3 PE=1 SV=3	ARP3_HUMAN	SwissProt_20160121.fasta	47,371.9	100.0%	1	1	1	0.0159%	2.15%	HNPVFGVMS	R	-	99.4%	28.8	25.2	27.3	0	1	0	0	2	1,083.4329	1,776.25		79,432.3	410	418	Empty	TRUE
ARP	ARP	_CJK_160715_Krishna_ARP_16 (F013878)	Actin-related protein 3 OS=Homo sapiens GN=ACTR3 PE=1 SV=3	ARP3_HUMAN	SwissProt_20160121.fasta	47,371.9	100.0%	1	1	1	0.0163%	2.15%	HNPVFGVMS	R	-	99.7%	28.6	25.2	27.8	0	1	0	0	2	1,083.4329	1,775.01		43,484.5	410	418	Empty	TRUE
ARP	ARP	_CJK_160715_Krishna_ARP_17 (F013879)	Actin-related protein 3 OS=Homo sapiens GN=ACTR3 PE=1 SV=3	ARP3_HUMAN	SwissProt_20160121.fasta	47,371.9	100.0%	1	1	1	0.0163%	2.15%	HNPVFGVMS	R	-	99.2%	32.5	25.1	30.1	0	1	0	0	2	1,083.4329	1,792.78		19,227.5	410	418	Empty	TRUE
