# Supplementary figures and images for: ERK3/MAPK6 dictates CDC42/RAC1 activity and ARP2/3-dependent actin polymerization
Source: eLife journal article supplement (doi:10.7554/elife.85167), 2023-04-14

Figure 1

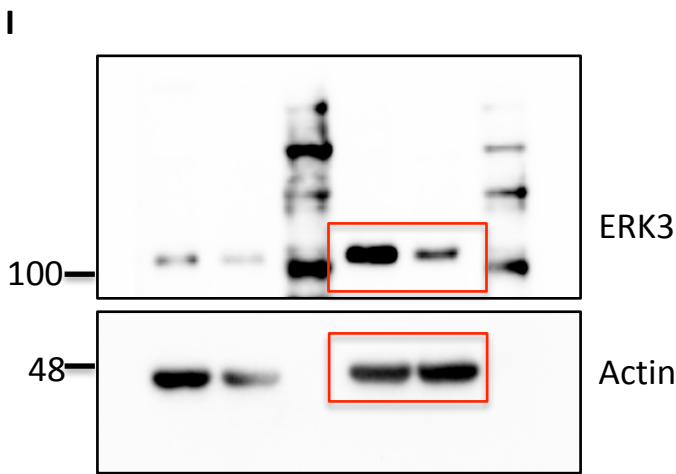

Supplement: fig1-data4 [file elife-85167-fig1-data4-v3.zip]

Figure 1-figure supplement 1

A

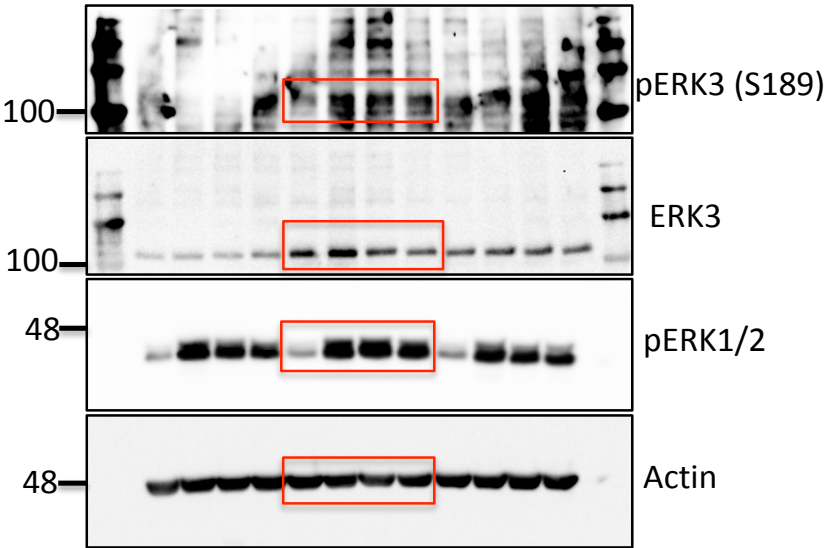

C

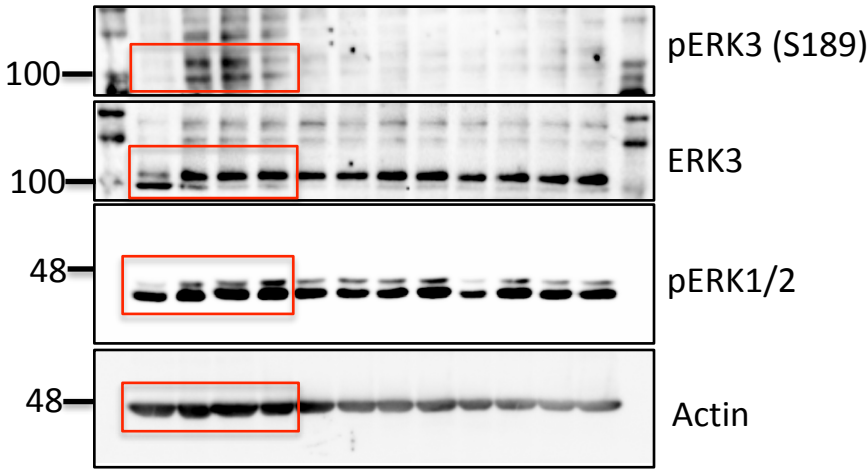

E

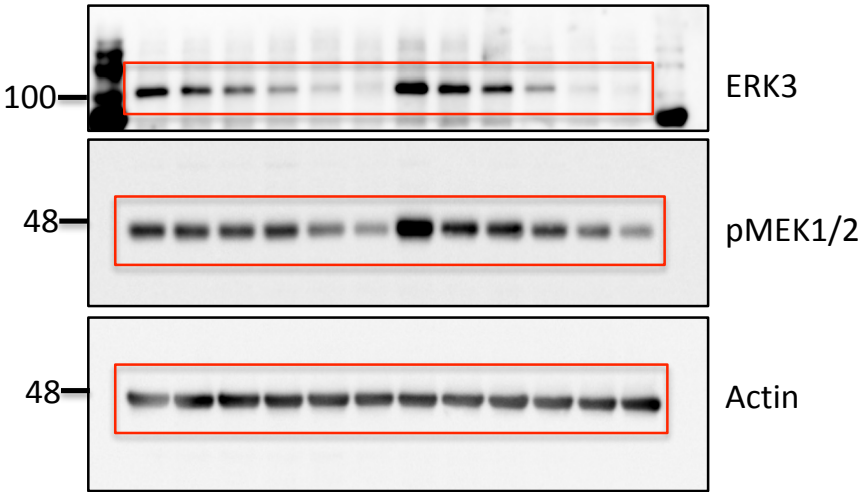

Supplement: fig1-figsupp2-data1 [file Figure 1-figure supplement 2A,2C and 2E-source data.pdf › Figure 1-figure supplement 2-source data 1/Figure 1-figure supplement 2A,2C and 2E-source data.pdf]

Figure 2

B

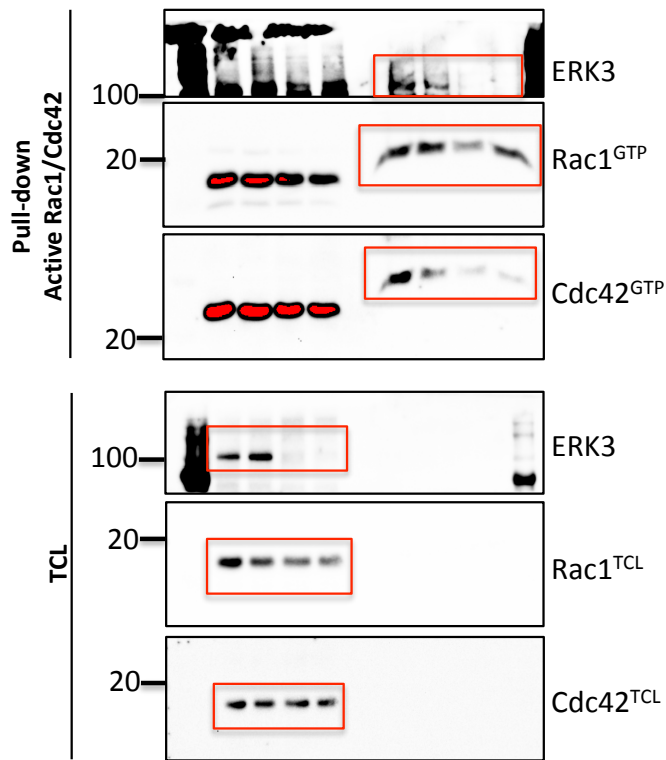

C

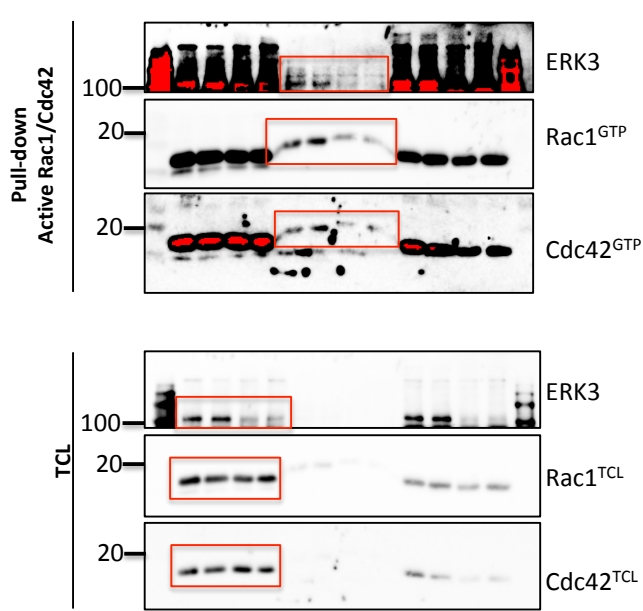

H

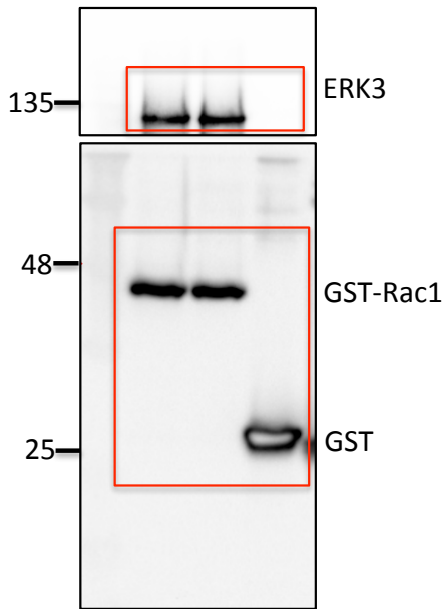

I

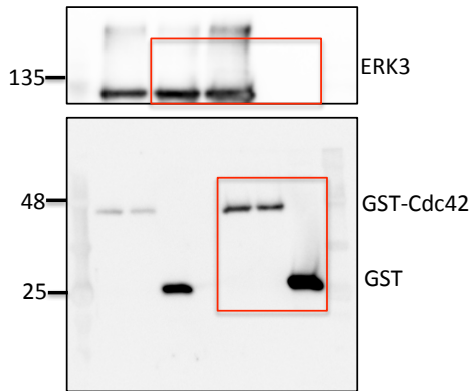

L

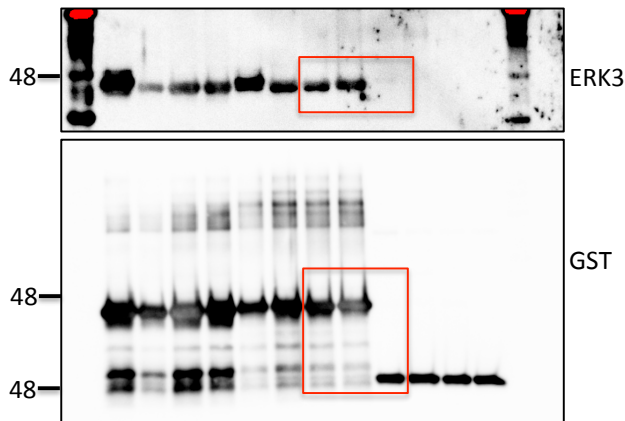

Supplement: fig2-data1 [file elife-85167-fig2-data1-v3.zip]

Figure 2-figure supplement 1

A

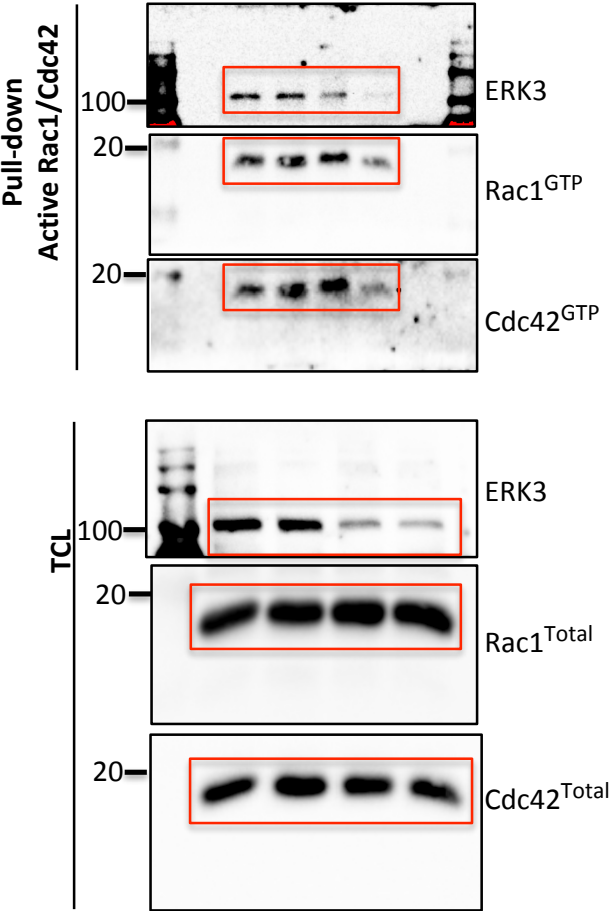

D

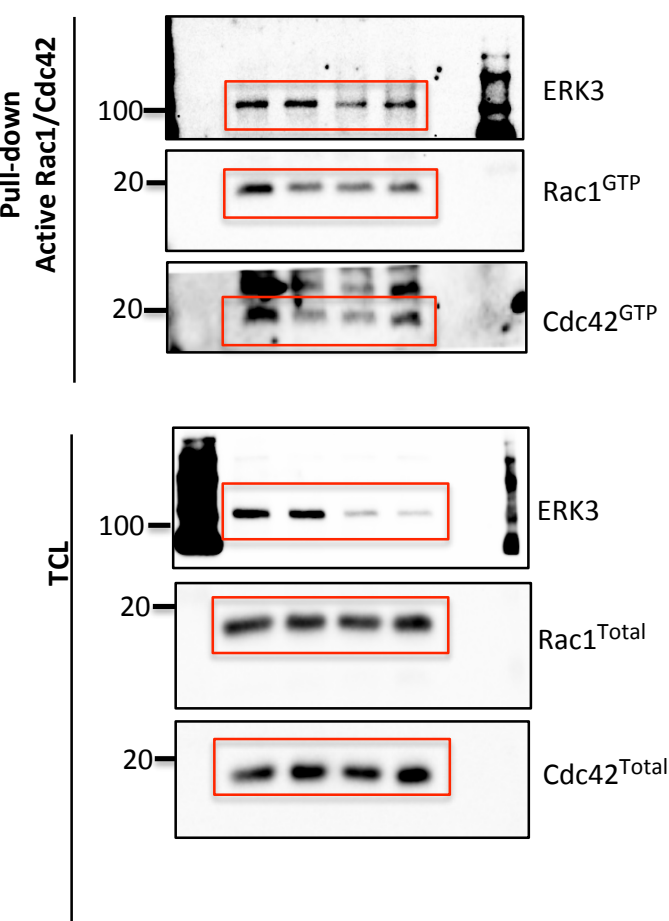

Supplement: fig2-figsupp1-data1 [file Figure 2-figure supplement 1A and 1D-source data.pdf › Figure 2-figure supplement 1-source data 1/Figure 2-figure supplement 1A and 1D-source data.pdf]

Figure 2-figure supplement 2

A

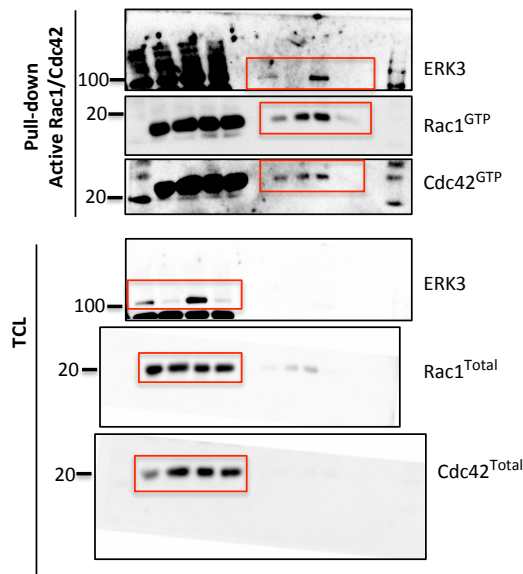

D

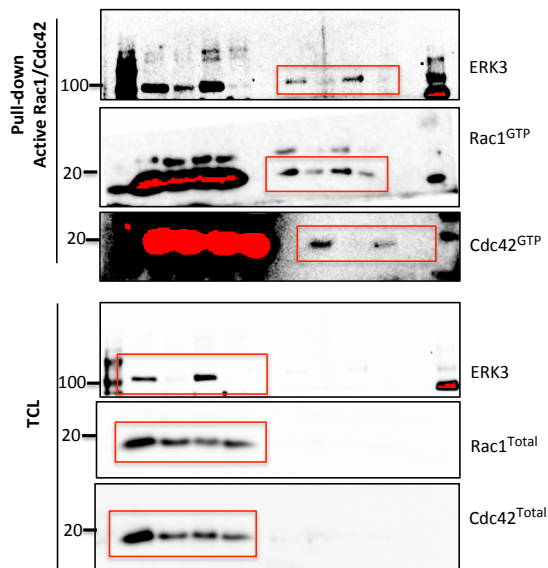

G

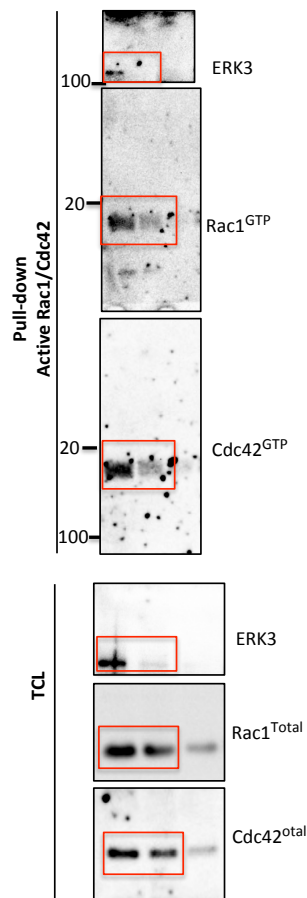

Supplement: fig2-figsupp2-data1 [file Figure 2-figure supplement 2A,2D and 2G-source data.pdf › Figure 2-figure supplement 2-source data 1/Figure 2-figure supplement 2A,2D and 2G-source data.pdf]

Figure 2-figure supplement 3

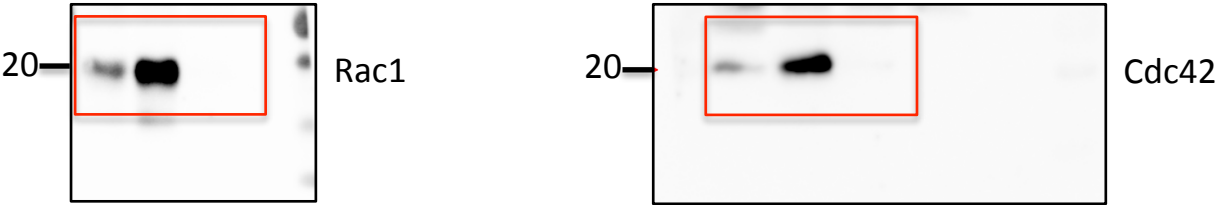

Supplement: fig2-figsupp3-data1 [file Figure 2-figure supplement 3.pdf › Figure 2-figure supplement 3-source data/Figure 2-figure supplement 3.pdf]

Figure 4

A

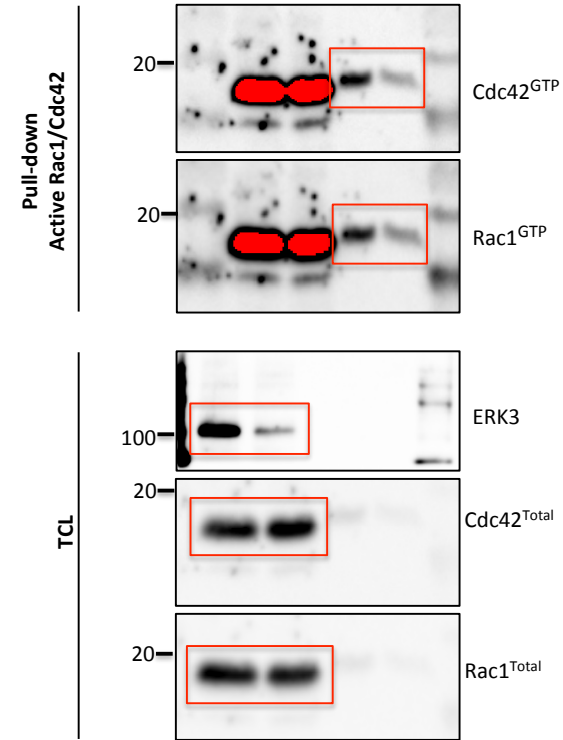

B

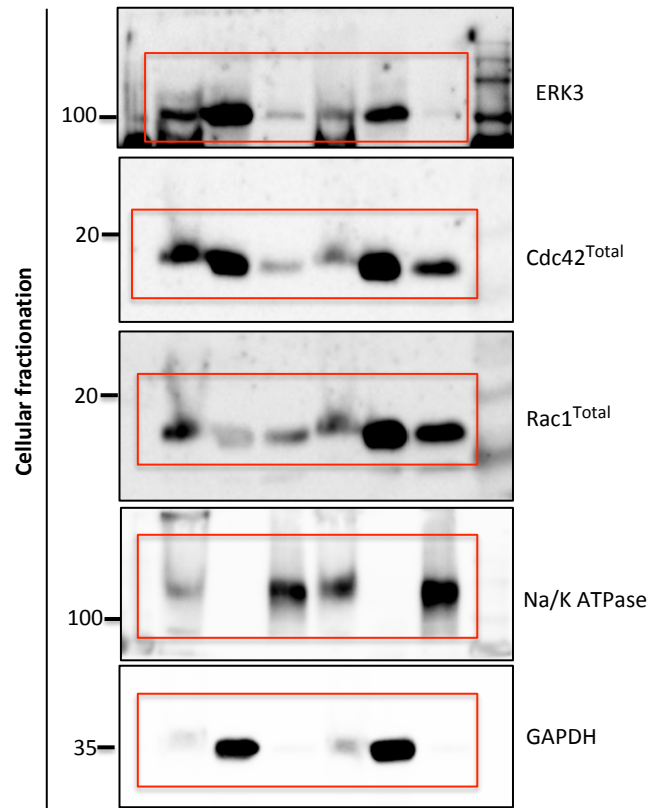

C

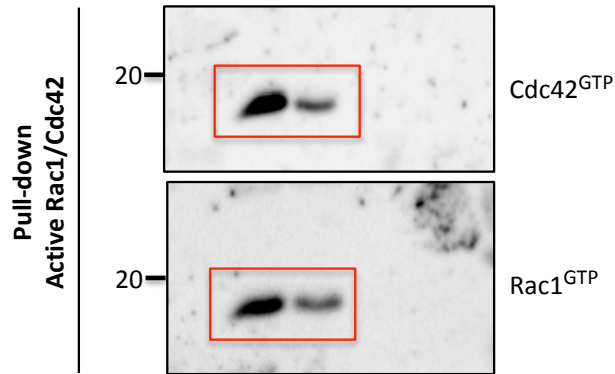

Supplement: fig4-data1 [file elife-85167-fig4-data1-v3.zip]

Figure 5

B

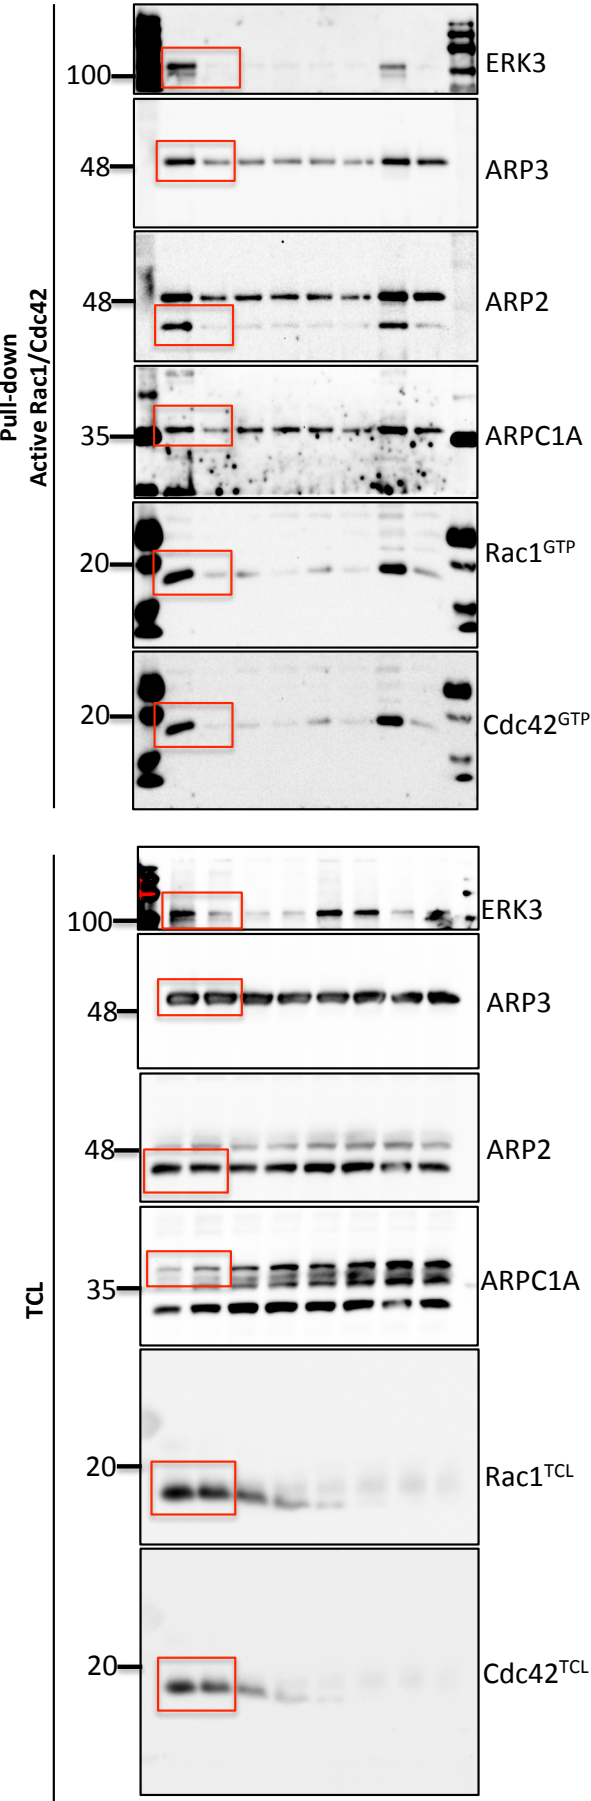

C

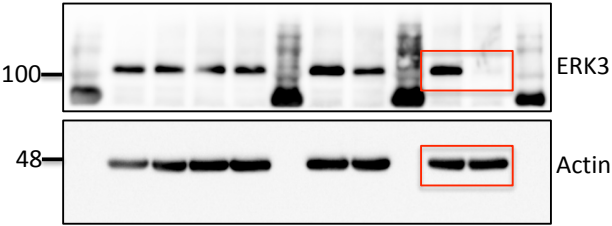

D

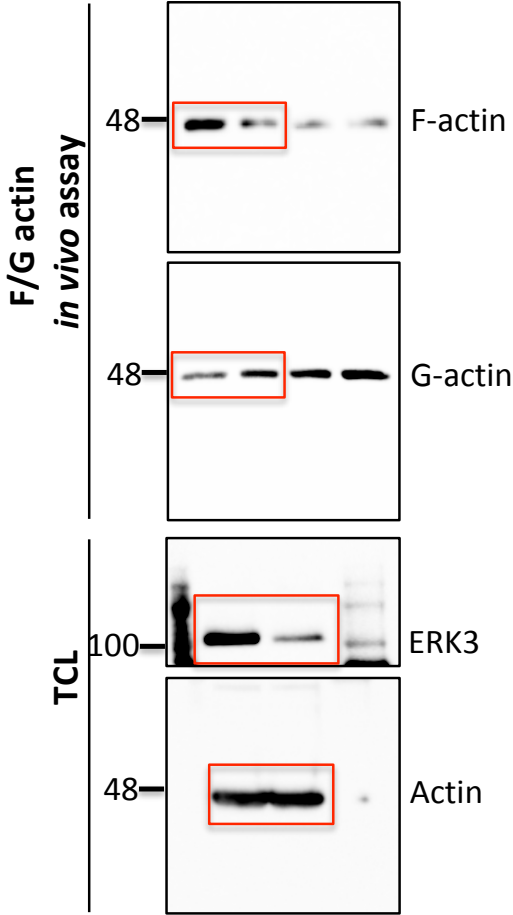

Supplement: fig5-data1 [file elife-85167-fig5-data1-v3.zip]

Figure 5-figure supplement 2

A

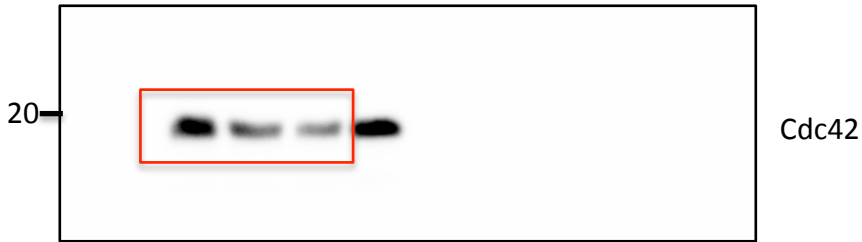

Supplement: fig5-figsupp2-data1 [file elife-85167-fig5-figsupp2-data1-v3.zip]

**Figure 6**

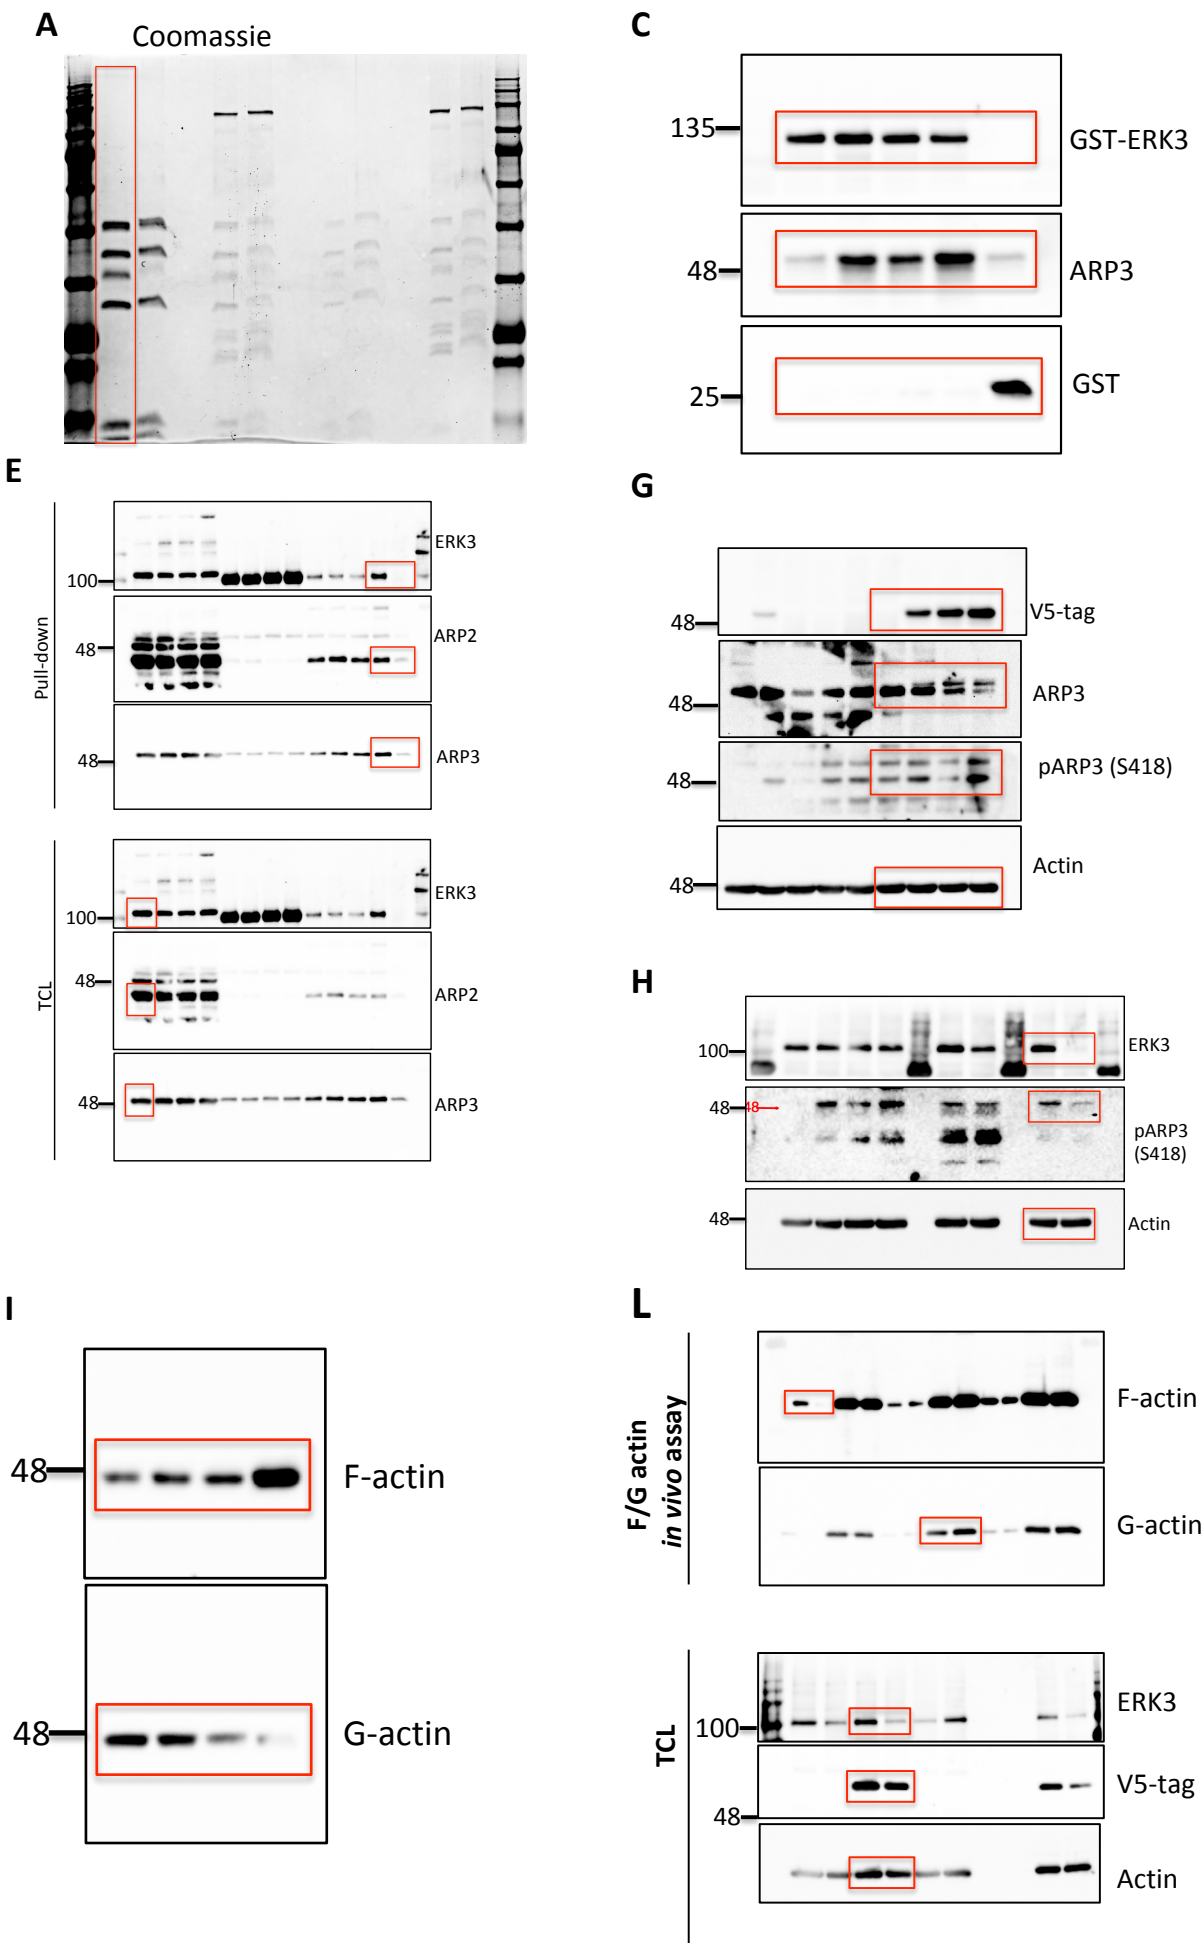

Supplement: fig6-data1 [file elife-85167-fig6-data1-v3.zip]

Figure 6-figure supplement 1

A

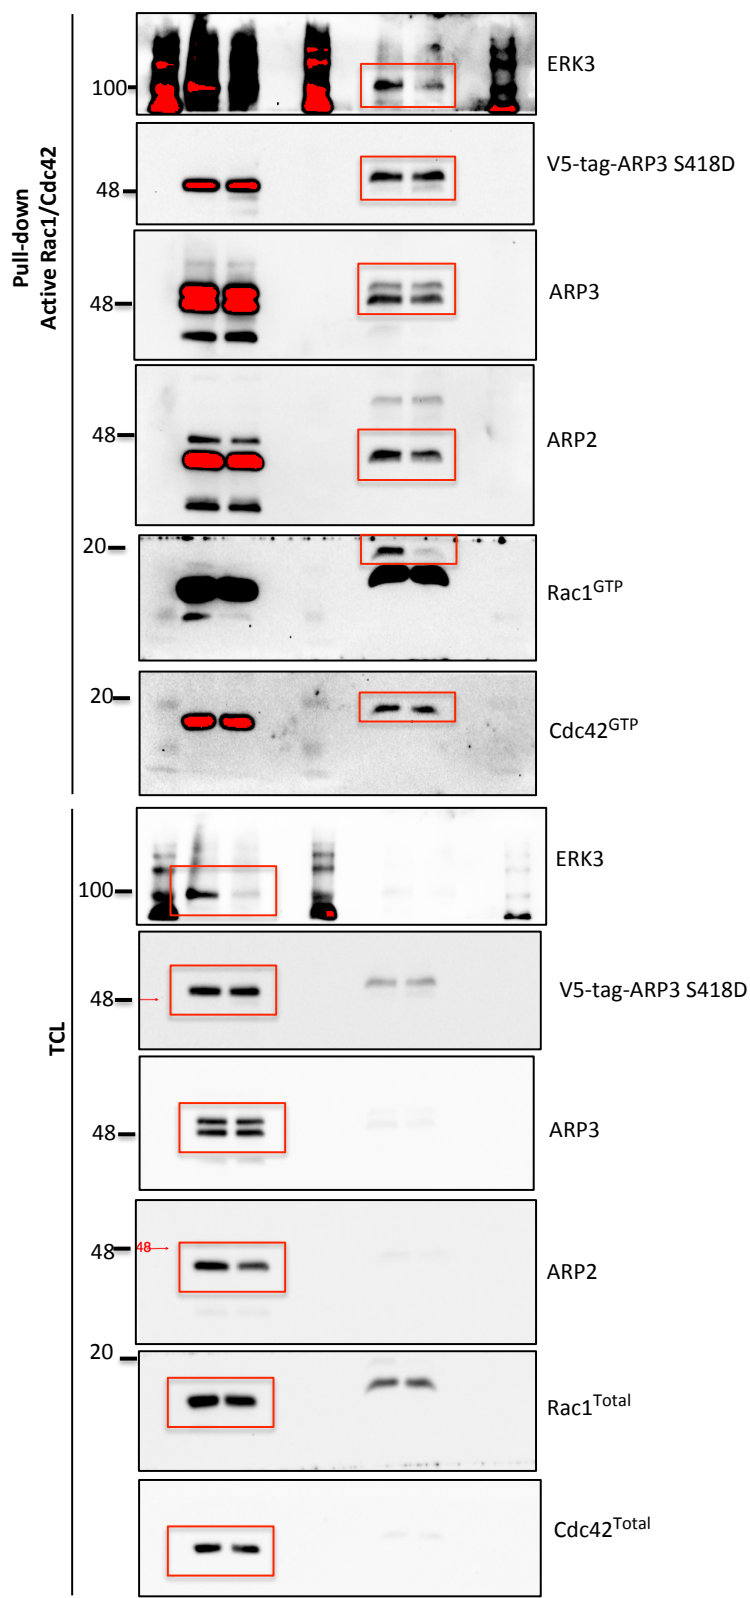

Supplement: fig6-figsupp2-data1 [file Figure 6-figure supplement 2A-source data.pdf › Figure 6-figure supplement 2-source data 1/Figure 6-figure supplement 2A-source data.pdf]

Figure 7

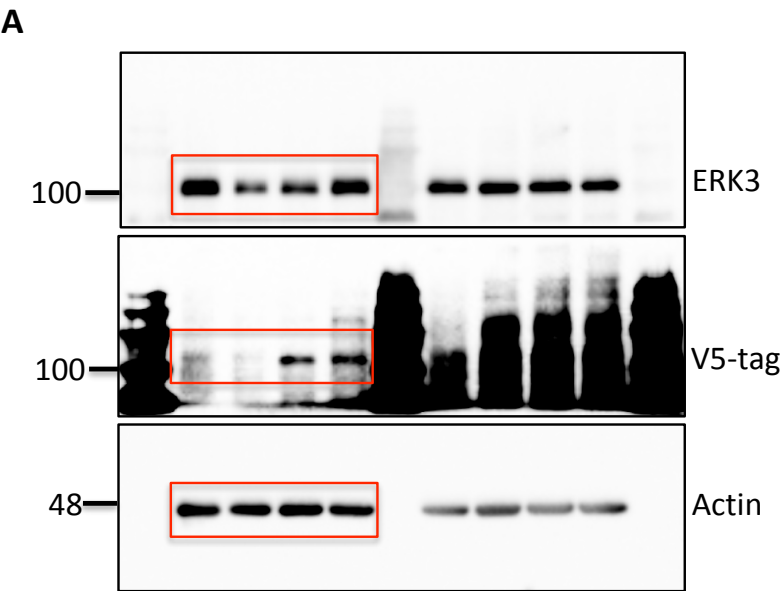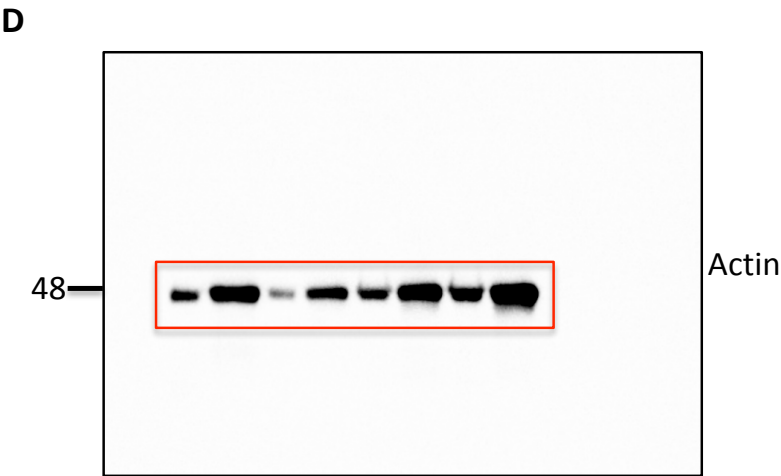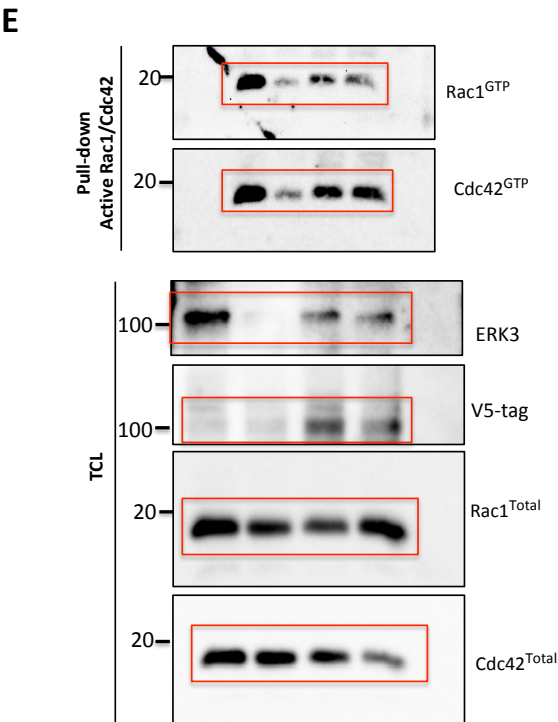

Supplement: fig7-data1 [file Figure 7A, 7D and 7E-source data.pdf › Figure 7 -source data 1/Figure 7A, 7D and 7E-source data.pdf]

Figure 7-figure supplement 1

A

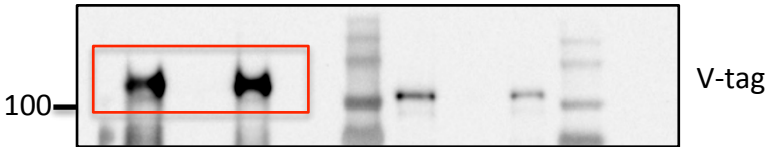

Supplement: fig7-data1 [file Figure 7-figure supplement 1A-source data.pdf › Figure 7 -source data 1/Figure 7E-source data/Figure 7-figure supplement 1A-source data.pdf]
